# Supplementary material
Source: publisher figshare collection journal article supplement (https://acs.figshare.com/ndownloader/files/7872046)
Supplement: Supplementary file 1 [file 7872046]

 
data_li0050
 
_audit_creation_method            'SHELXL-2016/4'
_shelx_SHELXL_version_number      '2016/4'
_chemical_name_systematic         ?
_chemical_name_common             ?
_chemical_melting_point           ?
_chemical_formula_moiety          'C16 H32 Cl2 Li3 N4 O2 Sb, C4 H8 O'
_chemical_formula_sum
 'C20 H40 Cl2 Li3 N4 O3 Sb' 
_chemical_formula_weight          598.03

loop_
 _atom_type_symbol
 _atom_type_description
 _atom_type_scat_dispersion_real
 _atom_type_scat_dispersion_imag
 _atom_type_scat_source
 'C'  'C'   0.0033   0.0016
 'International Tables Vol C Tables 4.2.6.8 and 6.1.1.4'
 'H'  'H'   0.0000   0.0000
 'International Tables Vol C Tables 4.2.6.8 and 6.1.1.4'
 'Li'  'Li'  -0.0003   0.0001
 'International Tables Vol C Tables 4.2.6.8 and 6.1.1.4'
 'N'  'N'   0.0061   0.0033
 'International Tables Vol C Tables 4.2.6.8 and 6.1.1.4'
 'O'  'O'   0.0106   0.0060
 'International Tables Vol C Tables 4.2.6.8 and 6.1.1.4'
 'Sb'  'Sb'  -0.5866   1.5461
 'International Tables Vol C Tables 4.2.6.8 and 6.1.1.4'
 'Cl'  'Cl'   0.1484   0.1585
 'International Tables Vol C Tables 4.2.6.8 and 6.1.1.4'
 
_space_group_crystal_system       triclinic
_space_group_IT_number            2
_space_group_name_H-M_alt         'P -1'
_space_group_name_Hall            '-P 1'
 
_shelx_space_group_comment
;
The symmetry employed for this shelxl refinement is uniquely defined
by the following loop, which should always be used as a source of
symmetry information in preference to the above space-group names.
They are only intended as comments.
;
 
loop_
 _space_group_symop_operation_xyz
 'x, y, z'
 '-x, -y, -z'
 
_cell_length_a                    11.5142(5)
_cell_length_b                    12.0844(5)
_cell_length_c                    12.4101(5)
_cell_angle_alpha                 102.187(3)
_cell_angle_beta                  111.543(3)
_cell_angle_gamma                 107.316(3)
_cell_volume                      1430.06(11)
_cell_formula_units_Z             2
_cell_measurement_temperature     153(2)
_cell_measurement_reflns_used     16064
_cell_measurement_theta_min       1.894
_cell_measurement_theta_max       29.167
 
_exptl_crystal_description        plate
_exptl_crystal_colour             'pale yellow'
_exptl_crystal_density_meas       ?
_exptl_crystal_density_method     ?
_exptl_crystal_density_diffrn     1.389          
_exptl_crystal_F_000              612
_exptl_transmission_factor_min    ?
_exptl_transmission_factor_max    ?
_exptl_crystal_size_max           0.320
_exptl_crystal_size_mid           0.250
_exptl_crystal_size_min           0.130
_exptl_absorpt_coefficient_mu     1.177
_shelx_estimated_absorpt_T_min    0.705
_shelx_estimated_absorpt_T_max    0.862
_exptl_absorpt_correction_type    numerical
_exptl_absorpt_correction_T_min   0.7163
_exptl_absorpt_correction_T_max   0.8878
_exptl_absorpt_process_details    'X-Area and X-Red (STOE & Cie, 2002)'
_exptl_absorpt_special_details    ?
_diffrn_ambient_temperature       153(2)
_diffrn_radiation_wavelength      0.71073
_diffrn_radiation_type            MoK\a
_diffrn_source                    'fine-focus sealed tube'
_diffrn_measurement_device_type   'STOE IPDS 2T'
_diffrn_measurement_method        'area detector'
_diffrn_detector_area_resol_mean  6.67
_diffrn_reflns_number             11916
_diffrn_reflns_av_unetI/netI      0.0399
_diffrn_reflns_av_R_equivalents   0.0435
_diffrn_reflns_limit_h_min        -13
_diffrn_reflns_limit_h_max        14
_diffrn_reflns_limit_k_min        -14
_diffrn_reflns_limit_k_max        14
_diffrn_reflns_limit_l_min        -15
_diffrn_reflns_limit_l_max        15
_diffrn_reflns_theta_min          2.073
_diffrn_reflns_theta_max          25.994
_diffrn_reflns_theta_full         25.242
_diffrn_measured_fraction_theta_max   0.997
_diffrn_measured_fraction_theta_full  0.996
_diffrn_reflns_Laue_measured_fraction_max    0.997
_diffrn_reflns_Laue_measured_fraction_full   0.996
_diffrn_reflns_point_group_measured_fraction_max   0.997
_diffrn_reflns_point_group_measured_fraction_full  0.996
_reflns_number_total              5600
_reflns_number_gt                 5051
_reflns_threshold_expression      'I > 2\s(I)'
_reflns_Friedel_coverage          0.000
_reflns_Friedel_fraction_max      .
_reflns_Friedel_fraction_full     .
 
_reflns_special_details
;
 Reflections were merged by SHELXL according to the crystal
 class for the calculation of statistics and refinement.
 
 _reflns_Friedel_fraction is defined as the number of unique
 Friedel pairs measured divided by the number that would be
 possible theoretically, ignoring centric projections and
 systematic absences.
;
 
_computing_data_collection        'X-Area (STOE & Cie, 2002)'
_computing_cell_refinement        'X-Area (STOE & Cie, 2002)'
_computing_data_reduction         'X-Area and X-Red (STOE & Cie, 2002)'
_computing_structure_solution     'SIR-97 (Altamore et al., 1997)'
_computing_structure_refinement 'SHELXL-2016/4 (Sheldrick, 2016)'
_computing_molecular_graphics     'Diamond (Brandenburg, 1999)'
_computing_publication_material   'SHELXL-2016/4 (Sheldrick, 2016)'
_refine_special_details           ?
_refine_ls_structure_factor_coef  Fsqd
_refine_ls_matrix_type            full
_refine_ls_weighting_scheme       calc
_refine_ls_weighting_details
'w=1/[\s^2^(Fo^2^)+(0.0250P)^2^+5.6630P] where P=(Fo^2^+2Fc^2^)/3'
_atom_sites_solution_primary      heavy
_atom_sites_solution_secondary    difmap
_atom_sites_solution_hydrogens    geom
_refine_ls_hydrogen_treatment     constr
_refine_ls_extinction_method      'SHELXL-2016/4 (Sheldrick 2016)'
_refine_ls_extinction_coef        0.0040(6)
_refine_ls_extinction_expression
 'Fc^*^=kFc[1+0.001xFc^2^\l^3^/sin(2\q)]^-1/4^'
_refine_ls_number_reflns          5600
_refine_ls_number_parameters      318
_refine_ls_number_restraints      70
_refine_ls_R_factor_all           0.0488
_refine_ls_R_factor_gt            0.0433
_refine_ls_wR_factor_ref          0.1089
_refine_ls_wR_factor_gt           0.1072
_refine_ls_goodness_of_fit_ref    1.181
_refine_ls_restrained_S_all       1.199
_refine_ls_shift/su_max           0.001
_refine_ls_shift/su_mean          0.000
 
loop_
 _atom_site_label
 _atom_site_type_symbol
 _atom_site_fract_x
 _atom_site_fract_y
 _atom_site_fract_z
 _atom_site_U_iso_or_equiv
 _atom_site_adp_type
 _atom_site_occupancy
 _atom_site_site_symmetry_order  
 _atom_site_calc_flag
 _atom_site_refinement_flags_posn
 _atom_site_refinement_flags_adp
 _atom_site_refinement_flags_occupancy
 _atom_site_disorder_assembly
 _atom_site_disorder_group
C1 C 0.8319(5) 1.0264(4) 0.7096(5) 0.0305(10) Uani 1 1 d . . . . .
H1 H 0.928336 1.038584 0.754663 0.037 Uiso 1 1 calc R U . . .
H2 H 0.815689 1.102799 0.726400 0.037 Uiso 1 1 calc R U . . .
C2 C 0.7467(5) 0.9305(5) 0.5831(4) 0.0303(10) Uani 1 1 d . . . . .
H4 H 0.677538 0.947227 0.520931 0.036 Uiso 1 1 calc R U . . .
H3 H 0.790146 0.883035 0.549184 0.036 Uiso 1 1 calc R U . . .
C3 C 0.5198(6) 0.7457(5) 0.8662(5) 0.0407(13) Uani 1 1 d . . . . .
H6 H 0.488960 0.806231 0.900834 0.049 Uiso 1 1 calc R U . . .
H5 H 0.573684 0.716244 0.926874 0.049 Uiso 1 1 calc R U . . .
C4 C 0.4277(5) 0.6560(5) 0.7358(5) 0.0371(12) Uani 1 1 d . . . . .
H7 H 0.424735 0.571162 0.715659 0.044 Uiso 1 1 calc R U . . .
H8 H 0.339967 0.661195 0.689606 0.044 Uiso 1 1 calc R U . . .
C5 C 0.2958(6) 0.7181(5) 0.4651(5) 0.0448(14) Uani 1 1 d . . . . .
H10 H 0.261099 0.758164 0.516869 0.054 Uiso 1 1 calc R U . . .
H9 H 0.233751 0.631035 0.409117 0.054 Uiso 1 1 calc R U . . .
C6 C 0.3776(6) 0.7960(5) 0.4206(5) 0.0412(13) Uani 1 1 d . . . . .
H11 H 0.367877 0.757790 0.337157 0.049 Uiso 1 1 calc R U . . .
H12 H 0.395268 0.885123 0.445082 0.049 Uiso 1 1 calc R U . . .
C7 C 0.6392(6) 1.0846(5) 0.9602(5) 0.0390(12) Uani 1 1 d . . . . .
H13 H 0.675580 1.106165 1.051086 0.047 Uiso 1 1 calc R U . . .
H14 H 0.539066 1.058527 0.913771 0.047 Uiso 1 1 calc R U . . .
C8 C 0.7260(6) 1.1541(5) 0.9151(5) 0.0384(12) Uani 1 1 d . . . . .
H16 H 0.680737 1.172093 0.840180 0.046 Uiso 1 1 calc R U . . .
H15 H 0.817261 1.219734 0.977506 0.046 Uiso 1 1 calc R U . . .
C9 C 0.5822(7) 0.6773(6) 0.2829(5) 0.0490(15) Uani 1 1 d . . . . .
H17 H 0.669978 0.674195 0.332859 0.059 Uiso 1 1 calc R U . . .
H18 H 0.592186 0.764241 0.309870 0.059 Uiso 1 1 calc R U . . .
C10 C 0.5424(9) 0.6292(9) 0.1479(6) 0.085(3) Uani 1 1 d . . . . .
H20 H 0.574786 0.698033 0.120128 0.102 Uiso 1 1 calc R U . . .
H19 H 0.581337 0.568989 0.129842 0.102 Uiso 1 1 calc R U . . .
C11 C 0.3952(8) 0.5698(8) 0.0877(6) 0.073(2) Uani 1 1 d . . . . .
H21 H 0.361223 0.497942 0.011530 0.088 Uiso 1 1 calc R U . . .
H22 H 0.356102 0.628916 0.064413 0.088 Uiso 1 1 calc R U . . .
C12 C 0.3552(6) 0.5282(6) 0.1768(5) 0.0459(14) Uani 1 1 d . . . . .
H24 H 0.275952 0.545301 0.175633 0.055 Uiso 1 1 calc R U . . .
H23 H 0.329859 0.437818 0.156162 0.055 Uiso 1 1 calc R U . . .
C13A C 0.8015(6) 0.9563(7) 1.2060(6) 0.0546(16) Uani 0.36(3) 1 d . U P A 1
H25A H 0.788428 0.872390 1.159760 0.066 Uiso 0.36(3) 1 calc R U P A 1
H26A H 0.709883 0.957759 1.180003 0.066 Uiso 0.36(3) 1 calc R U P A 1
C13B C 0.8015(6) 0.9563(7) 1.2060(6) 0.0546(16) Uani 0.64(3) 1 d . U P A 2
H25B H 0.823129 0.882528 1.199186 0.066 Uiso 0.64(3) 1 calc R U P A 2
H26B H 0.701928 0.929668 1.154768 0.066 Uiso 0.64(3) 1 calc R U P A 2
C14B C 0.8521(16) 1.0366(19) 1.3452(13) 0.064(3) Uani 0.64(3) 1 d . U P A 2
H27B H 0.776038 1.015280 1.367206 0.076 Uiso 0.64(3) 1 calc R U P A 2
H28B H 0.927365 1.021429 1.401729 0.076 Uiso 0.64(3) 1 calc R U P A 2
C14A C 0.863(2) 0.978(3) 1.336(2) 0.059(5) Uani 0.36(3) 1 d . U P A 1
H27A H 0.934988 0.946896 1.360610 0.071 Uiso 0.36(3) 1 calc R U P A 1
H28A H 0.794115 0.943002 1.363252 0.071 Uiso 0.36(3) 1 calc R U P A 1
C15B C 0.8996(17) 1.1646(18) 1.3551(14) 0.071(4) Uani 0.64(3) 1 d . U P A 2
H29B H 0.823198 1.191030 1.330955 0.085 Uiso 0.64(3) 1 calc R U P A 2
H30B H 0.970805 1.220208 1.440502 0.085 Uiso 0.64(3) 1 calc R U P A 2
C15A C 0.919(3) 1.114(3) 1.379(2) 0.058(5) Uani 0.36(3) 1 d . U P A 1
H29A H 1.003946 1.149702 1.458810 0.069 Uiso 0.36(3) 1 calc R U P A 1
H30A H 0.852019 1.143131 1.393397 0.069 Uiso 0.36(3) 1 calc R U P A 1
C16A C 0.9534(8) 1.1633(7) 1.2716(6) 0.0587(17) Uani 0.36(3) 1 d . U P A 1
H31A H 0.914966 1.223763 1.251414 0.070 Uiso 0.36(3) 1 calc R U P A 1
H32A H 1.052759 1.198638 1.296479 0.070 Uiso 0.36(3) 1 calc R U P A 1
C16B C 0.9534(8) 1.1633(7) 1.2716(6) 0.0587(17) Uani 0.64(3) 1 d . U P A 2
H31B H 1.051723 1.180413 1.314894 0.070 Uiso 0.64(3) 1 calc R U P A 2
H32B H 0.945640 1.229149 1.237194 0.070 Uiso 0.64(3) 1 calc R U P A 2
C17 C 0.0679(12) 0.3337(9) -0.2283(12) 0.105(3) Uani 1 1 d D U . . .
H34 H 0.125826 0.296616 -0.182209 0.126 Uiso 1 1 calc R U . . .
H33 H -0.006039 0.267559 -0.307643 0.126 Uiso 1 1 calc R U . . .
C18 C 0.0087(11) 0.3818(8) -0.1566(11) 0.101(3) Uani 1 1 d D U . . .
H35 H 0.049326 0.380247 -0.071764 0.121 Uiso 1 1 calc R U . . .
H36 H -0.091741 0.333219 -0.196852 0.121 Uiso 1 1 calc R U . . .
C19 C 0.0415(11) 0.5072(9) -0.1534(11) 0.107(3) Uani 1 1 d D U . . .
H38 H 0.107459 0.566259 -0.067704 0.129 Uiso 1 1 calc R U . . .
H37 H -0.042483 0.522790 -0.179514 0.129 Uiso 1 1 calc R U . . .
C20 C 0.1006(11) 0.5256(9) -0.2360(12) 0.101(3) Uani 1 1 d D U . . .
H40 H 0.179694 0.607365 -0.198297 0.121 Uiso 1 1 calc R U . . .
H39 H 0.031964 0.519641 -0.316274 0.121 Uiso 1 1 calc R U . . .
LI1 Li 0.7306(8) 0.7629(7) 0.7505(7) 0.0264(16) Uani 1 1 d . . . . .
LI2 Li 0.4810(8) 0.6037(7) 0.4591(7) 0.0294(17) Uani 1 1 d . . . . .
LI3 Li 0.8756(8) 1.0126(7) 1.0075(7) 0.0278(16) Uani 1 1 d . . . . .
N1 N 0.7234(4) 0.9087(3) 0.6868(3) 0.0220(7) Uani 1 1 d . . . . .
N2 N 0.5551(4) 0.7595(3) 0.7671(3) 0.0239(8) Uani 1 1 d . . . . .
N3 N 0.4398(4) 0.7511(3) 0.5178(3) 0.0262(8) Uani 1 1 d . . . . .
N4 N 0.7034(4) 1.0260(3) 0.9000(3) 0.0239(8) Uani 1 1 d . . . . .
O1 O 0.4730(4) 0.5972(3) 0.2968(3) 0.0371(8) Uani 1 1 d . . . . .
O2 O 0.8812(4) 1.0455(3) 1.1734(3) 0.0347(8) Uani 1 1 d . . . . .
O3 O 0.1439(9) 0.4238(8) -0.2518(10) 0.140(3) Uani 1 1 d D U . . .
SB Sb 0.55050(3) 0.90332(3) 0.70324(3) 0.02254(12) Uani 1 1 d . . . . .
CL1 Cl 0.68710(11) 0.59414(10) 0.58471(10) 0.0273(2) Uani 1 1 d . . . . .
CL2 Cl 0.91040(11) 0.82965(10) 0.95094(10) 0.0262(2) Uani 1 1 d . . . . .
 
loop_
 _atom_site_aniso_label
 _atom_site_aniso_U_11
 _atom_site_aniso_U_22
 _atom_site_aniso_U_33
 _atom_site_aniso_U_23
 _atom_site_aniso_U_13
 _atom_site_aniso_U_12
C1 0.026(2) 0.024(2) 0.035(3) 0.009(2) 0.015(2) 0.0032(19)
C2 0.034(3) 0.036(3) 0.027(2) 0.013(2) 0.019(2) 0.014(2)
C3 0.056(3) 0.039(3) 0.043(3) 0.020(2) 0.036(3) 0.019(3)
C4 0.033(3) 0.030(3) 0.049(3) 0.016(2) 0.024(2) 0.006(2)
C5 0.037(3) 0.038(3) 0.038(3) -0.002(2) 0.005(2) 0.014(2)
C6 0.048(3) 0.037(3) 0.028(3) 0.010(2) 0.001(2) 0.026(3)
C7 0.042(3) 0.044(3) 0.028(3) 0.004(2) 0.015(2) 0.023(3)
C8 0.047(3) 0.025(2) 0.036(3) 0.004(2) 0.014(2) 0.018(2)
C9 0.054(4) 0.042(3) 0.033(3) 0.007(2) 0.021(3) -0.001(3)
C10 0.080(6) 0.108(7) 0.036(4) 0.020(4) 0.031(4) -0.002(5)
C11 0.078(5) 0.091(6) 0.028(3) 0.016(3) 0.017(3) 0.021(5)
C12 0.041(3) 0.049(3) 0.027(3) 0.002(2) 0.010(2) 0.006(3)
C13A 0.041(3) 0.071(4) 0.058(3) 0.036(3) 0.029(3) 0.015(3)
C13B 0.041(3) 0.071(4) 0.058(3) 0.036(3) 0.029(3) 0.015(3)
C14B 0.070(5) 0.076(7) 0.052(5) 0.028(5) 0.039(4) 0.021(6)
C14A 0.057(7) 0.074(8) 0.047(6) 0.024(6) 0.034(5) 0.014(7)
C15B 0.081(6) 0.076(7) 0.051(5) 0.009(5) 0.042(4) 0.022(5)
C15A 0.064(7) 0.070(8) 0.040(6) 0.013(6) 0.032(5) 0.024(7)
C16A 0.064(4) 0.058(4) 0.039(3) 0.000(3) 0.021(3) 0.020(3)
C16B 0.064(4) 0.058(4) 0.039(3) 0.000(3) 0.021(3) 0.020(3)
C17 0.110(6) 0.056(4) 0.142(7) 0.030(5) 0.057(5) 0.030(4)
C18 0.084(5) 0.072(5) 0.122(6) 0.034(5) 0.041(5) 0.011(4)
C19 0.076(5) 0.074(5) 0.152(7) 0.020(5) 0.055(5) 0.016(4)
C20 0.085(5) 0.074(5) 0.160(7) 0.060(5) 0.064(5) 0.030(4)
LI1 0.024(4) 0.023(4) 0.026(4) 0.005(3) 0.010(3) 0.007(3)
LI2 0.033(4) 0.027(4) 0.023(4) 0.007(3) 0.011(3) 0.009(3)
LI3 0.027(4) 0.029(4) 0.023(4) 0.007(3) 0.010(3) 0.010(3)
N1 0.0256(19) 0.0185(17) 0.0196(17) 0.0062(14) 0.0105(15) 0.0064(15)
N2 0.0258(19) 0.0228(19) 0.0226(18) 0.0082(15) 0.0131(16) 0.0067(16)
N3 0.035(2) 0.0200(18) 0.0241(19) 0.0088(15) 0.0129(17) 0.0125(16)
N4 0.0185(18) 0.0254(19) 0.0273(19) 0.0117(16) 0.0090(15) 0.0090(15)
O1 0.041(2) 0.039(2) 0.0211(16) 0.0059(14) 0.0136(15) 0.0068(17)
O2 0.0338(19) 0.038(2) 0.0265(17) 0.0098(15) 0.0143(15) 0.0076(16)
O3 0.112(5) 0.113(5) 0.185(6) 0.030(5) 0.092(5) 0.020(4)
SB 0.02174(16) 0.02125(17) 0.02081(16) 0.00458(11) 0.00712(12) 0.00949(12)
CL1 0.0243(5) 0.0217(5) 0.0266(5) 0.0017(4) 0.0095(4) 0.0055(4)
CL2 0.0234(5) 0.0227(5) 0.0245(5) 0.0067(4) 0.0065(4) 0.0066(4)
 
_geom_special_details
;
 All esds (except the esd in the dihedral angle between two l.s. planes)
 are estimated using the full covariance matrix.  The cell esds are taken
 into account individually in the estimation of esds in distances, angles
 and torsion angles; correlations between esds in cell parameters are only
 used when they are defined by crystal symmetry.  An approximate (isotropic)
 treatment of cell esds is used for estimating esds involving l.s. planes.
;
 
loop_
 _geom_bond_atom_site_label_1
 _geom_bond_atom_site_label_2
 _geom_bond_distance
 _geom_bond_site_symmetry_2
 _geom_bond_publ_flag
C1 N1 1.474(6) . ?
C1 C2 1.482(7) . ?
C2 N1 1.466(6) . ?
C3 N2 1.455(6) . ?
C3 C4 1.495(8) . ?
C4 N2 1.466(6) . ?
C5 N3 1.426(7) . ?
C5 C6 1.466(9) . ?
C6 N3 1.462(6) . ?
C7 N4 1.449(6) . ?
C7 C8 1.458(8) . ?
C8 N4 1.450(6) . ?
C9 O1 1.433(7) . ?
C9 C10 1.490(8) . ?
C10 C11 1.438(11) . ?
C11 C12 1.469(9) . ?
C12 O1 1.439(6) . ?
C13A O2 1.426(7) . ?
C13A C14A 1.43(2) . ?
C13B O2 1.426(7) . ?
C13B C14B 1.575(17) . ?
C14B C15B 1.44(2) . ?
C14A C15A 1.47(3) . ?
C15B C16B 1.389(15) . ?
C15A C16A 1.70(3) . ?
C16A O2 1.422(7) . ?
C16B O2 1.422(7) . ?
C17 O3 1.338(11) . ?
C17 C18 1.434(12) . ?
C18 C19 1.436(11) . ?
C19 C20 1.443(12) . ?
C20 O3 1.462(11) . ?
LI1 N1 2.089(9) . ?
LI1 N2 2.095(9) . ?
LI1 CL2 2.346(8) . ?
LI1 CL1 2.347(8) . ?
LI1 SB 3.024(8) . ?
LI1 LI3 3.330(11) . ?
LI1 LI2 3.343(11) . ?
LI1 N4 3.489(9) . ?
LI2 O1 1.966(9) . ?
LI2 N3 2.034(9) . ?
LI2 CL1 2.366(8) . ?
LI2 CL1 2.384(8) 2_666 ?
LI2 LI2 2.984(17) 2_666 ?
LI3 O2 1.986(8) . ?
LI3 N4 2.019(9) . ?
LI3 CL2 2.371(8) . ?
LI3 CL2 2.414(8) 2_777 ?
LI3 LI3 3.036(16) 2_777 ?
N1 SB 2.059(4) . ?
N2 SB 2.064(4) . ?
N3 SB 2.228(4) . ?
N4 SB 2.240(4) . ?
CL1 LI2 2.384(8) 2_666 ?
CL2 LI3 2.413(8) 2_777 ?
 
loop_
 _geom_angle_atom_site_label_1
 _geom_angle_atom_site_label_2
 _geom_angle_atom_site_label_3
 _geom_angle
 _geom_angle_site_symmetry_1
 _geom_angle_site_symmetry_3
 _geom_angle_publ_flag
N1 C1 C2 59.5(3) . . ?
N1 C2 C1 60.0(3) . . ?
N2 C3 C4 59.6(3) . . ?
N2 C4 C3 58.8(3) . . ?
N3 C5 C6 60.7(3) . . ?
N3 C6 C5 58.3(3) . . ?
N4 C7 C8 59.9(3) . . ?
N4 C8 C7 59.8(3) . . ?
O1 C9 C10 105.4(5) . . ?
C11 C10 C9 104.6(6) . . ?
C10 C11 C12 106.9(6) . . ?
O1 C12 C11 106.1(5) . . ?
O2 C13A C14A 113.1(12) . . ?
O2 C13B C14B 99.6(8) . . ?
C15B C14B C13B 106.5(10) . . ?
C13A C14A C15A 96.9(19) . . ?
C16B C15B C14B 102.2(11) . . ?
C14A C15A C16A 109.7(16) . . ?
O2 C16A C15A 96.8(11) . . ?
C15B C16B O2 109.9(9) . . ?
O3 C17 C18 110.8(8) . . ?
C17 C18 C19 104.0(9) . . ?
C18 C19 C20 109.1(9) . . ?
C19 C20 O3 102.7(8) . . ?
N1 LI1 N2 85.8(3) . . ?
N1 LI1 CL2 112.8(3) . . ?
N2 LI1 CL2 108.0(3) . . ?
N1 LI1 CL1 107.8(3) . . ?
N2 LI1 CL1 113.7(3) . . ?
CL2 LI1 CL1 122.8(3) . . ?
N1 LI1 SB 42.80(18) . . ?
N2 LI1 SB 42.95(18) . . ?
CL2 LI1 SB 118.5(3) . . ?
CL1 LI1 SB 118.7(3) . . ?
N1 LI1 LI3 75.4(3) . . ?
N2 LI1 LI3 80.7(3) . . ?
CL2 LI1 LI3 45.39(19) . . ?
CL1 LI1 LI3 165.2(3) . . ?
SB LI1 LI3 73.7(2) . . ?
N1 LI1 LI2 79.7(3) . . ?
N2 LI1 LI2 77.3(3) . . ?
CL2 LI1 LI2 166.4(4) . . ?
CL1 LI1 LI2 45.1(2) . . ?
SB LI1 LI2 74.1(2) . . ?
LI3 LI1 LI2 147.8(3) . . ?
N1 LI1 N4 54.7(2) . . ?
N2 LI1 N4 56.2(2) . . ?
CL2 LI1 N4 79.2(2) . . ?
CL1 LI1 N4 157.7(3) . . ?
SB LI1 N4 39.43(11) . . ?
LI3 LI1 N4 34.34(17) . . ?
LI2 LI1 N4 113.6(3) . . ?
O1 LI2 N3 105.7(4) . . ?
O1 LI2 CL1 109.0(4) . . ?
N3 LI2 CL1 120.0(4) . . ?
O1 LI2 CL1 103.9(3) . 2_666 ?
N3 LI2 CL1 115.0(4) . 2_666 ?
CL1 LI2 CL1 102.1(3) . 2_666 ?
O1 LI2 LI2 116.7(5) . 2_666 ?
N3 LI2 LI2 137.2(5) . 2_666 ?
CL1 LI2 LI2 51.3(2) . 2_666 ?
CL1 LI2 LI2 50.8(2) 2_666 2_666 ?
O1 LI2 LI1 132.7(4) . . ?
N3 LI2 LI1 76.0(3) . . ?
CL1 LI2 LI1 44.59(19) . . ?
CL1 LI2 LI1 118.4(3) 2_666 . ?
LI2 LI2 LI1 79.3(3) 2_666 . ?
O2 LI3 N4 104.5(4) . . ?
O2 LI3 CL2 109.4(4) . . ?
N4 LI3 CL2 120.8(4) . . ?
O2 LI3 CL2 103.2(3) . 2_777 ?
N4 LI3 CL2 116.3(4) . 2_777 ?
CL2 LI3 CL2 101.2(3) . 2_777 ?
O2 LI3 LI3 116.2(4) . 2_777 ?
N4 LI3 LI3 138.8(5) . 2_777 ?
CL2 LI3 LI3 51.2(2) . 2_777 ?
CL2 LI3 LI3 50.0(2) 2_777 2_777 ?
O2 LI3 LI1 135.3(4) . . ?
N4 LI3 LI1 77.1(3) . . ?
CL2 LI3 LI1 44.77(19) . . ?
CL2 LI3 LI1 116.1(3) 2_777 . ?
LI3 LI3 LI1 78.2(3) 2_777 . ?
C2 N1 C1 60.5(3) . . ?
C2 N1 SB 122.9(3) . . ?
C1 N1 SB 121.8(3) . . ?
C2 N1 LI1 128.0(4) . . ?
C1 N1 LI1 132.0(4) . . ?
SB N1 LI1 93.6(3) . . ?
C3 N2 C4 61.5(3) . . ?
C3 N2 SB 122.4(3) . . ?
C4 N2 SB 120.8(3) . . ?
C3 N2 LI1 129.5(4) . . ?
C4 N2 LI1 131.6(4) . . ?
SB N2 LI1 93.3(3) . . ?
C5 N3 C6 61.0(4) . . ?
C5 N3 LI2 111.4(4) . . ?
C6 N3 LI2 114.5(4) . . ?
C5 N3 SB 111.0(3) . . ?
C6 N3 SB 110.3(3) . . ?
LI2 N3 SB 128.9(3) . . ?
C7 N4 C8 60.4(4) . . ?
C7 N4 LI3 118.4(4) . . ?
C8 N4 LI3 111.6(4) . . ?
C7 N4 SB 110.0(3) . . ?
C8 N4 SB 109.3(3) . . ?
LI3 N4 SB 127.3(3) . . ?
C7 N4 LI1 151.5(3) . . ?
C8 N4 LI1 146.1(3) . . ?
LI3 N4 LI1 68.5(3) . . ?
SB N4 LI1 59.01(15) . . ?
C9 O1 C12 109.2(4) . . ?
C9 O1 LI2 123.2(4) . . ?
C12 O1 LI2 127.0(4) . . ?
C16A O2 C13A 110.4(5) . . ?
C16B O2 C13B 110.4(5) . . ?
C16B O2 LI3 125.1(4) . . ?
C16A O2 LI3 125.1(4) . . ?
C13A O2 LI3 124.2(4) . . ?
C13B O2 LI3 124.2(4) . . ?
C17 O3 C20 107.9(8) . . ?
N1 SB N2 87.34(15) . . ?
N1 SB N3 84.18(14) . . ?
N2 SB N3 83.07(14) . . ?
N1 SB N4 82.93(14) . . ?
N2 SB N4 84.68(14) . . ?
N3 SB N4 162.59(14) . . ?
N1 SB LI1 43.59(18) . . ?
N2 SB LI1 43.75(18) . . ?
N3 SB LI1 81.03(17) . . ?
N4 SB LI1 81.56(17) . . ?
LI1 CL1 LI2 90.4(3) . . ?
LI1 CL1 LI2 117.7(3) . 2_666 ?
LI2 CL1 LI2 77.9(3) . 2_666 ?
LI1 CL2 LI3 89.8(3) . . ?
LI1 CL2 LI3 115.4(3) . 2_777 ?
LI3 CL2 LI3 78.8(3) . 2_777 ?
 
loop_
 _geom_torsion_atom_site_label_1
 _geom_torsion_atom_site_label_2
 _geom_torsion_atom_site_label_3
 _geom_torsion_atom_site_label_4
 _geom_torsion
 _geom_torsion_site_symmetry_1
 _geom_torsion_site_symmetry_2
 _geom_torsion_site_symmetry_3
 _geom_torsion_site_symmetry_4
 _geom_torsion_publ_flag
O1 C9 C10 C11 26.9(10) . . . . ?
C9 C10 C11 C12 -27.5(10) . . . . ?
C10 C11 C12 O1 18.0(9) . . . . ?
O2 C13B C14B C15B 24.8(12) . . . . ?
O2 C13A C14A C15A 37(2) . . . . ?
C13B C14B C15B C16B -33.7(15) . . . . ?
C13A C14A C15A C16A -29(2) . . . . ?
C14A C15A C16A O2 12.8(19) . . . . ?
C14B C15B C16B O2 30.3(16) . . . . ?
O3 C17 C18 C19 7.6(14) . . . . ?
C17 C18 C19 C20 8.1(13) . . . . ?
C18 C19 C20 O3 -19.1(12) . . . . ?
C1 C2 N1 SB 110.7(4) . . . . ?
C1 C2 N1 LI1 -122.3(5) . . . . ?
C2 C1 N1 SB -112.6(4) . . . . ?
C2 C1 N1 LI1 116.3(5) . . . . ?
C4 C3 N2 SB 110.2(4) . . . . ?
C4 C3 N2 LI1 -122.2(5) . . . . ?
C3 C4 N2 SB -112.7(4) . . . . ?
C3 C4 N2 LI1 119.1(5) . . . . ?
C6 C5 N3 LI2 -107.0(4) . . . . ?
C6 C5 N3 SB 102.2(4) . . . . ?
C5 C6 N3 LI2 101.9(5) . . . . ?
C5 C6 N3 SB -103.4(4) . . . . ?
C8 C7 N4 LI3 100.0(5) . . . . ?
C8 C7 N4 SB -101.4(3) . . . . ?
C8 C7 N4 LI1 -162.8(7) . . . . ?
C7 C8 N4 LI3 -111.3(4) . . . . ?
C7 C8 N4 SB 102.5(3) . . . . ?
C7 C8 N4 LI1 165.3(6) . . . . ?
C10 C9 O1 C12 -16.1(8) . . . . ?
C10 C9 O1 LI2 172.0(6) . . . . ?
C11 C12 O1 C9 -0.7(7) . . . . ?
C11 C12 O1 LI2 170.8(6) . . . . ?
C15B C16B O2 C13B -14.8(13) . . . . ?
C15B C16B O2 LI3 159.2(12) . . . . ?
C15A C16A O2 C13A 9.9(12) . . . . ?
C15A C16A O2 LI3 -176.2(11) . . . . ?
C14A C13A O2 C16A -32.3(17) . . . . ?
C14A C13A O2 LI3 153.7(16) . . . . ?
C14B C13B O2 C16B -6.4(9) . . . . ?
C14B C13B O2 LI3 179.5(8) . . . . ?
C18 C17 O3 C20 -20.1(15) . . . . ?
C19 C20 O3 C17 23.8(13) . . . . ?
 
_refine_diff_density_max    1.106
_refine_diff_density_min   -0.915
_refine_diff_density_rms    0.106

_shelx_res_file
;
TITL        LI0050
 li0050.res created by SHELXL-2016/4 at 12:27:49 on 04-Jan-2017
CELL  0.71073 11.51420 12.08440 12.41010 102.18700 111.54300 107.31600
ZERR 2  0.00050  0.00050  0.00050  0.00300  0.00300  0.00300
LATT 1
SFAC C H LI N O SB CL
UNIT 40 80 6 8 6 2 4
TEMP -120
PLAN 30
FMAP 2
OMIT -6 52
L.S. 15
OMIT 0 1 0
OMIT -4 -5 7
OMIT 1 -7 5
SIZE 0.32 0.25 0.13
SADI C17 C18 C18 C19 C19 C20
SADI C17 O3 C20 O3
SIMU 0.01 C17 C18 C19 C20 O3
EXYZ C13A C13B
EADP C13A C13B
EXYZ C16A C16B
EADP C16A C16B
SIMU 0.01 C13A C14A C15A C16A
SIMU 0.01 C13B C14B C15B C16B
BOND
CONF
ACTA
BIND N4 LI1
WGHT    0.025000    5.663000
EXTI    0.003974
FVAR       0.52850   0.36362
C1    1    0.831854    1.026394    0.709610    11.00000    0.02640    0.02372 =
         0.03546    0.00912    0.01479    0.00321
AFIX  23
H1    2    0.928336    1.038584    0.754663    11.00000   -1.20000
H2    2    0.815689    1.102799    0.726400    11.00000   -1.20000
AFIX   0
C2    1    0.746659    0.930482    0.583074    11.00000    0.03419    0.03603 =
         0.02683    0.01323    0.01913    0.01446
AFIX  23
H4    2    0.677538    0.947227    0.520931    11.00000   -1.20000
H3    2    0.790146    0.883035    0.549184    11.00000   -1.20000
AFIX   0
C3    1    0.519844    0.745727    0.866203    11.00000    0.05590    0.03928 =
         0.04255    0.01966    0.03638    0.01866
AFIX  23
H6    2    0.488960    0.806231    0.900834    11.00000   -1.20000
H5    2    0.573684    0.716244    0.926874    11.00000   -1.20000
AFIX   0
C4    1    0.427687    0.656025    0.735788    11.00000    0.03302    0.02998 =
         0.04896    0.01630    0.02423    0.00582
AFIX  23
H7    2    0.424735    0.571162    0.715659    11.00000   -1.20000
H8    2    0.339967    0.661195    0.689606    11.00000   -1.20000
AFIX   0
C5    1    0.295838    0.718144    0.465055    11.00000    0.03702    0.03768 =
         0.03827   -0.00165    0.00519    0.01426
AFIX  23
H10   2    0.261099    0.758164    0.516869    11.00000   -1.20000
H9    2    0.233751    0.631035    0.409117    11.00000   -1.20000
AFIX   0
C6    1    0.377559    0.795971    0.420581    11.00000    0.04793    0.03683 =
         0.02816    0.00977    0.00134    0.02595
AFIX  23
H11   2    0.367877    0.757790    0.337157    11.00000   -1.20000
H12   2    0.395268    0.885123    0.445082    11.00000   -1.20000
AFIX   0
C7    1    0.639213    1.084577    0.960172    11.00000    0.04234    0.04437 =
         0.02835    0.00385    0.01529    0.02315
AFIX  23
H13   2    0.675580    1.106165    1.051086    11.00000   -1.20000
H14   2    0.539066    1.058527    0.913771    11.00000   -1.20000
AFIX   0
C8    1    0.725953    1.154132    0.915126    11.00000    0.04726    0.02456 =
         0.03635    0.00421    0.01380    0.01756
AFIX  23
H16   2    0.680737    1.172093    0.840180    11.00000   -1.20000
H15   2    0.817261    1.219734    0.977506    11.00000   -1.20000
AFIX   0
C9    1    0.582166    0.677302    0.282908    11.00000    0.05370    0.04159 =
         0.03293    0.00705    0.02119   -0.00120
AFIX  23
H17   2    0.669978    0.674195    0.332859    11.00000   -1.20000
H18   2    0.592186    0.764241    0.309870    11.00000   -1.20000
AFIX   0
C10   1    0.542413    0.629226    0.147908    11.00000    0.07992    0.10814 =
         0.03647    0.02002    0.03090   -0.00192
AFIX  23
H20   2    0.574786    0.698033    0.120128    11.00000   -1.20000
H19   2    0.581337    0.568989    0.129842    11.00000   -1.20000
AFIX   0
C11   1    0.395157    0.569757    0.087713    11.00000    0.07846    0.09110 =
         0.02763    0.01592    0.01673    0.02065
AFIX  23
H21   2    0.361223    0.497942    0.011530    11.00000   -1.20000
H22   2    0.356102    0.628916    0.064413    11.00000   -1.20000
AFIX   0
C12   1    0.355214    0.528164    0.176797    11.00000    0.04079    0.04858 =
         0.02717    0.00231    0.01013    0.00646
AFIX  23
H24   2    0.275952    0.545301    0.175633    11.00000   -1.20000
H23   2    0.329859    0.437818    0.156162    11.00000   -1.20000
PART 1
AFIX   0
C13A  1    0.801466    0.956297    1.205958    21.00000    0.04088    0.07106 =
         0.05834    0.03575    0.02910    0.01474
AFIX  23
H25A  2    0.788428    0.872390    1.159760    21.00000   -1.20000
H26A  2    0.709883    0.957759    1.180003    21.00000   -1.20000
PART 2
AFIX   0
C13B  1    0.801466    0.956297    1.205958   -21.00000    0.04088    0.07106 =
         0.05834    0.03575    0.02910    0.01474
AFIX  23
H25B  2    0.823129    0.882528    1.199186   -21.00000   -1.20000
H26B  2    0.701928    0.929668    1.154768   -21.00000   -1.20000
AFIX   0
C14B  1    0.852114    1.036647    1.345155   -21.00000    0.06956    0.07566 =
         0.05200    0.02824    0.03900    0.02051
AFIX  23
H27B  2    0.776038    1.015280    1.367206   -21.00000   -1.20000
H28B  2    0.927365    1.021429    1.401729   -21.00000   -1.20000
PART 1
AFIX   0
C14A  1    0.862625    0.978158    1.335671    21.00000    0.05733    0.07383 =
         0.04686    0.02405    0.03400    0.01385
AFIX  23
H27A  2    0.934988    0.946896    1.360610    21.00000   -1.20000
H28A  2    0.794115    0.943002    1.363252    21.00000   -1.20000
PART 2
AFIX   0
C15B  1    0.899616    1.164599    1.355102   -21.00000    0.08124    0.07597 =
         0.05114    0.00880    0.04249    0.02219
AFIX  23
H29B  2    0.823198    1.191030    1.330955   -21.00000   -1.20000
H30B  2    0.970805    1.220208    1.440502   -21.00000   -1.20000
PART 1
AFIX   0
C15A  1    0.918892    1.114219    1.379165    21.00000    0.06422    0.07026 =
         0.04005    0.01269    0.03240    0.02409
AFIX  23
H29A  2    1.003946    1.149702    1.458810    21.00000   -1.20000
H30A  2    0.852019    1.143131    1.393397    21.00000   -1.20000
AFIX   0
C16A  1    0.953414    1.163328    1.271557    21.00000    0.06402    0.05794 =
         0.03863    0.00017    0.02124    0.02041
AFIX  23
H31A  2    0.914966    1.223763    1.251414    21.00000   -1.20000
H32A  2    1.052759    1.198638    1.296479    21.00000   -1.20000
PART 2
AFIX   0
C16B  1    0.953414    1.163328    1.271557   -21.00000    0.06402    0.05794 =
         0.03863    0.00017    0.02124    0.02041
AFIX  23
H31B  2    1.051723    1.180413    1.314894   -21.00000   -1.20000
H32B  2    0.945640    1.229149    1.237194   -21.00000   -1.20000
PART 0
AFIX   0
C17   1    0.067869    0.333737   -0.228317    11.00000    0.10971    0.05580 =
         0.14218    0.03024    0.05689    0.02956
AFIX  23
H34   2    0.125826    0.296616   -0.182209    11.00000   -1.20000
H33   2   -0.006039    0.267559   -0.307643    11.00000   -1.20000
AFIX   0
C18   1    0.008729    0.381841   -0.156613    11.00000    0.08404    0.07180 =
         0.12231    0.03392    0.04094    0.01138
AFIX  23
H35   2    0.049326    0.380247   -0.071764    11.00000   -1.20000
H36   2   -0.091741    0.333219   -0.196852    11.00000   -1.20000
AFIX   0
C19   1    0.041543    0.507237   -0.153375    11.00000    0.07588    0.07429 =
         0.15151    0.02025    0.05492    0.01632
AFIX  23
H38   2    0.107459    0.566259   -0.067704    11.00000   -1.20000
H37   2   -0.042483    0.522790   -0.179514    11.00000   -1.20000
AFIX   0
C20   1    0.100617    0.525639   -0.235973    11.00000    0.08532    0.07365 =
         0.15955    0.05982    0.06447    0.03008
AFIX  23
H40   2    0.179694    0.607365   -0.198297    11.00000   -1.20000
H39   2    0.031964    0.519641   -0.316274    11.00000   -1.20000
AFIX   0
LI1   3    0.730591    0.762914    0.750494    11.00000    0.02419    0.02319 =
         0.02589    0.00471    0.01006    0.00699
LI2   3    0.480990    0.603732    0.459143    11.00000    0.03255    0.02669 =
         0.02323    0.00697    0.01131    0.00850
LI3   3    0.875601    1.012627    1.007450    11.00000    0.02664    0.02898 =
         0.02330    0.00710    0.00960    0.00987
N1    4    0.723449    0.908747    0.686778    11.00000    0.02558    0.01848 =
         0.01955    0.00615    0.01051    0.00636
N2    4    0.555111    0.759477    0.767144    11.00000    0.02576    0.02277 =
         0.02261    0.00821    0.01310    0.00672
N3    4    0.439774    0.751085    0.517849    11.00000    0.03517    0.01999 =
         0.02406    0.00878    0.01289    0.01253
N4    4    0.703385    1.025974    0.899993    11.00000    0.01855    0.02540 =
         0.02728    0.01168    0.00902    0.00899
O1    5    0.472959    0.597193    0.296776    11.00000    0.04051    0.03879 =
         0.02114    0.00593    0.01357    0.00681
O2    5    0.881205    1.045469    1.173409    11.00000    0.03382    0.03773 =
         0.02649    0.00979    0.01432    0.00760
O3    5    0.143896    0.423778   -0.251841    11.00000    0.11242    0.11344 =
         0.18504    0.02999    0.09213    0.01983
SB    6    0.550504    0.903322    0.703241    11.00000    0.02174    0.02125 =
         0.02081    0.00458    0.00712    0.00949
CL1   7    0.687104    0.594135    0.584711    11.00000    0.02434    0.02166 =
         0.02656    0.00171    0.00948    0.00545
CL2   7    0.910403    0.829649    0.950937    11.00000    0.02343    0.02273 =
         0.02447    0.00666    0.00655    0.00656
HKLF 4


REM         LI0050
REM R1 =  0.0433 for    5051 Fo > 4sig(Fo)  and  0.0488 for all    5600 data
REM    318 parameters refined using     70 restraints

END

WGHT      0.0250      5.6651

REM Highest difference peak  1.106,  deepest hole -0.915,  1-sigma level  0.106
Q1    1   0.8727  1.2267  1.1612  11.00000  0.05    1.11
Q2    1   0.2227  0.5716  0.2620  11.00000  0.05    0.93
Q3    1   0.1429  0.3572 -0.2240  11.00000  0.05    0.85
Q4    1   0.7044  1.0604  0.9484  11.00000  0.05    0.76
Q5    1   0.6222  0.6758  0.1405  11.00000  0.05    0.73
Q6    1   0.0816  0.4204 -0.3435  11.00000  0.05    0.68
Q7    1   0.3700  0.7291  0.4848  11.00000  0.05    0.67
Q8    1   0.8396  0.7616  0.7897  11.00000  0.05    0.58
Q9    1   0.6464  0.9996  0.8233  11.00000  0.05    0.56
Q10   1   0.1166  0.3399 -0.3090  11.00000  0.05    0.55
Q11   1   0.0557  0.4077  0.0325  11.00000  0.05    0.54
Q12   1  -0.0406  0.6031 -0.3949  11.00000  0.05    0.53
Q13   1   0.4413  0.8771  0.6383  11.00000  0.05    0.53
Q14   1   0.7947  0.8453  1.3783  11.00000  0.05    0.52
Q15   1   1.0400  0.9922  1.4024  11.00000  0.05    0.50
Q16   1   0.4350  0.5206  0.0870  11.00000  0.05    0.49
Q17   1   0.6998  1.2239  1.1367  11.00000  0.05    0.46
Q18   1   0.9780  1.1818  1.3998  11.00000  0.05    0.45
Q19   1   0.9285  1.0141  0.8265  11.00000  0.05    0.45
Q20   1   0.4629  0.8060  0.5692  11.00000  0.05    0.44
Q21   1   1.0101  0.9438  1.0134  11.00000  0.05    0.44
Q22   1   0.0473  0.5244 -0.2203  11.00000  0.05    0.42
Q23   1   0.7530  0.6684  0.7090  11.00000  0.05    0.42
Q24   1   0.1348  0.6083 -0.3607  11.00000  0.05    0.37
Q25   1   0.5571  0.9948  0.6612  11.00000  0.05    0.37
Q26   1   0.4646  0.7230  0.4982  11.00000  0.05    0.37
Q27   1   0.5365  0.7046  0.1693  11.00000  0.05    0.37
Q28   1   1.0577  1.2784  1.5761  11.00000  0.05    0.37
Q29   1   0.0623  0.4396 -0.2076  11.00000  0.05    0.37
Q30   1   0.3175  0.8295  0.5511  11.00000  0.05    0.36
;
_shelx_res_checksum   53404

_shelx_hkl_file
;
  -1   0   0 2243.25   30.67   0
   2   0   0 2466.28   23.82   0
  -2   0   0 2459.58   23.91   0
   3   0   0  371.82    9.60   0
  -3   0   0  361.03    9.62   0
   4   0   0    3.91    7.83   0
  -4   0   0    5.78    5.54   0
   5   0   0  828.60   10.17   0
  -5   0   0  756.96    9.62   0
  -6   0   0  273.28    7.03   0
   6   0   0  274.72    9.24   0
   7   0   0  548.66    8.83   0
  -7   0   0  575.45   10.29   0
   8   0   0  705.72    9.28   0
  -8   0   0  757.56    9.15   0
  -9   0   0  462.28   10.00   0
   9   0   0  495.87   10.20   0
 -10   0   0  144.01    6.88   0
  10   0   0  146.64    7.02   0
  11   0   0  329.52   10.95   0
 -11   0   0  324.74    8.46   0
 -12   0   0  114.65   10.92   0
  12   0   0  115.97   11.08   0
 -13   0   0   59.72   11.92   0
  13   0   0   49.87    8.60   0
 -13   1   0   11.52    7.98   0
  13  -1   0    5.23    7.95   0
 -12   1   0   20.65   10.41   0
  12  -1   0   32.60    7.45   0
 -11   1   0  203.24    7.63   0
  11  -1   0  201.29    7.85   0
 -10   1   0  231.73    9.77   0
  10  -1   0  220.54    7.34   0
   9  -1   0   91.05    6.59   0
  -9   1   0  108.57    8.88   0
   8  -1   0  563.06    8.76   0
  -8   1   0  607.11   10.55   0
   7  -1   0  663.51    8.93   0
  -7   1   0  731.24   10.59   0
  -6   1   0 1789.83   14.30   0
   6  -1   0 1777.37   14.29   0
   5  -1   0  475.95    8.69   0
  -5   1   0  477.27    8.57   0
  -4   1   0   73.53    8.73   0
   4  -1   0   73.09    8.83   0
  -3   1   0  197.02    8.94   0
   3  -1   0  188.79    8.76   0
  -2   1   0   21.58    7.21   0
   2  -1   0   24.53    7.02   0
   0  -1   0  379.17   14.94   0
  -1  -1   0  453.06   13.85   0
   1   1   0  398.38   11.75   0
  -2  -1   0   14.68    7.36   0
   2   1   0   14.35    7.26   0
   3   1   0 3051.99   20.75   0
  -3  -1   0 3010.44   20.90   0
   4   1   0  276.22    7.32   0
  -4  -1   0  271.93    7.23   0
   5   1   0  765.62    9.43   0
  -5  -1   0  752.00    9.49   0
  -6  -1   0   25.38    7.78   0
   6   1   0   29.24    7.75   0
  -7  -1   0    8.70    5.92   0
   7   1   0    7.08    8.52   0
  -8  -1   0    4.45    5.83   0
   8   1   0    3.76    8.43   0
  -9  -1   0  243.51    7.32   0
   9   1   0  225.01    7.36   0
  10   1   0  186.80    7.34   0
 -10  -1   0  168.63    7.11   0
  11   1   0  459.36   11.61   0
 -11  -1   0  426.98    8.84   0
 -12  -1   0  127.06    8.40   0
  12   1   0  118.63    8.23   0
  14  -2   0   50.69   12.59   0
 -14   2   0   27.21    8.88   0
 -13   2   0   28.49    8.00   0
  13  -2   0   36.08   11.14   0
 -12   2   0   54.94   10.16   0
  12  -2   0   66.70   10.37   0
  11  -2   0   43.15    6.87   0
 -11   2   0   42.48    9.44   0
  10  -2   0  142.33    7.00   0
 -10   2   0  170.17    9.34   0
  -9   2   0  162.79    9.16   0
   9  -2   0  145.09    9.05   0
  -8   2   0  651.91    8.86   0
   8  -2   0  644.56    8.94   0
   7  -2   0  336.32    9.65   0
  -7   2   0  350.96    9.42   0
   6  -2   0  264.35    7.52   0
  -6   2   0  265.13    7.30   0
  -5   2   0 2194.63   16.52   0
   5  -2   0 2195.18   16.45   0
  -4   2   0 3075.68   20.62   0
   4  -2   0 2747.64   18.65   0
  -3   2   0  494.70   11.32   0
   3  -2   0  527.20   13.05   0
   1  -2   0   69.99    7.74   0
   0   2   0 1024.86   16.44   0
   0  -2   0 1050.41   16.74   0
  -1  -2   0   53.16    7.66   0
   1   2   0   51.53    7.82   0
  -2  -2   0   10.99    6.22   0
   2   2   0   17.37    8.94   0
   3   2   0 1041.92   11.68   0
  -3  -2   0  982.48   11.51   0
  -4  -2   0 1388.38   12.30   0
   4   2   0 1462.48   12.52   0
  -5  -2   0 1820.02   13.21   0
   5   2   0 2157.31   15.37   0
  -6  -2   0 1013.08   10.04   0
   6   2   0 1070.76   10.54   0
   7   2   0    3.18    8.34   0
  -7  -2   0   18.37    5.76   0
   8   2   0  185.23    6.88   0
  -8  -2   0  207.30    8.97   0
  -9  -2   0    3.14    6.04   0
   9   2   0   -1.63    6.22   0
 -10  -2   0   39.82    6.83   0
  10   2   0   38.99    6.82   0
  11   2   0   25.62    7.45   0
 -11  -2   0   39.72   10.67   0
  12   2   0  199.56   12.30   0
 -12  -2   0  217.78   12.32   0
 -14   3   0  148.26    9.26   0
  14  -3   0  143.46   12.65   0
  13  -3   0  139.34    8.50   0
 -13   3   0  145.78    8.50   0
 -12   3   0   35.57    7.17   0
  12  -3   0   31.38    7.27   0
  11  -3   0  271.95   10.43   0
 -11   3   0  281.81    7.95   0
 -10   3   0   95.92    9.05   0
  10  -3   0  100.56    6.86   0
  -9   3   0   62.39    6.26   0
   9  -3   0   65.29    8.61   0
  -8   3   0   31.71    5.99   0
   8  -3   0   36.48    8.32   0
  -7   3   0 1415.67   11.68   0
   7  -3   0 1473.88   12.10   0
   6  -3   0  263.20    9.61   0
  -6   3   0  233.56    7.42   0
  -5   3   0 1441.21   12.98   0
   5  -3   0 1467.10   13.13   0
   4  -3   0  272.63    8.81   0
   3  -3   0   24.99   13.22   0
   3  -3   0   30.10    7.19   0
  -2   3   0 2506.24   45.11   0
   1  -3   0  255.20    9.75   0
  -1   3   0  270.02   12.18   0
   0   3   0   64.86   10.10   0
   0  -3   0   60.53   10.48   0
  -1  -3   0 1008.65   12.94   0
   1   3   0  999.61   12.81   0
  -2  -3   0  131.34    8.67   0
   2   3   0  121.46    8.64   0
  -3  -3   0  146.80    6.27   0
   3   3   0  151.09    6.51   0
  -4  -3   0  394.15    9.24   0
   4   3   0  397.49    9.29   0
   5   3   0  450.91    8.09   0
  -5  -3   0  469.86    9.71   0
   6   3   0 1333.25   12.79   0
  -6  -3   0 1326.02   12.73   0
   7   3   0  196.42    6.77   0
  -7  -3   0  195.85    8.89   0
  -8  -3   0   79.52    8.68   0
   8   3   0   90.32    9.00   0
   9   3   0   10.41    6.55   0
  -9  -3   0    3.03    6.34   0
  10   3   0    9.71    6.95   0
 -10  -3   0   12.62    9.71   0
 -11  -3   0   31.89    7.67   0
  11   3   0   12.60    7.72   0
  12   3   0   19.77    8.62   0
 -12  -3   0   22.05   12.13   0
  14  -4   0   32.08   11.76   0
 -13   4   0  262.45    8.95   0
  13  -4   0  262.93    9.11   0
  12  -4   0  129.68   10.48   0
 -12   4   0  118.19    7.42   0
 -11   4   0  213.60    7.56   0
  11  -4   0  209.39    7.68   0
 -10   4   0   78.08    9.51   0
  10  -4   0   75.21    6.68   0
   9  -4   0    6.27    6.15   0
  -9   4   0    6.36    8.49   0
   8  -4   0  176.57    6.85   0
  -8   4   0  184.37    6.74   0
  -7   4   0   20.35    5.87   0
   7  -4   0   19.89    8.31   0
   6  -4   0   12.03    6.00   0
   5  -4   0 1815.21   14.77   0
   4  -4   0 2921.03   45.61   0
   4  -4   0 2946.20   19.61   0
   2  -4   0 2973.61   21.29   0
  -1   4   0  942.98   12.35   0
   1  -4   0  905.78   12.28   0
   0   4   0 1025.01   12.24   0
   0  -4   0 1065.77   12.54   0
  -1  -4   0  555.31   10.78   0
   1   4   0  543.75    9.18   0
   2   4   0   23.86    5.41   0
  -2  -4   0   23.76    5.41   0
   3   4   0   39.63    7.32   0
  -3  -4   0   35.37    5.41   0
   4   4   0  321.21    7.35   0
  -4  -4   0  359.53    9.29   0
  -5  -4   0  329.58    7.43   0
   5   4   0  343.47    7.59   0
   6   4   0  116.67    6.31   0
  -6  -4   0  123.48    6.38   0
  -7  -4   0  249.42    9.27   0
   7   4   0  250.40    9.40   0
   8   4   0  229.40    9.78   0
  -8  -4   0  239.27    9.65   0
   9   4   0  485.22    8.98   0
  -9  -4   0  548.63   11.40   0
  10   4   0   50.70   10.34   0
 -10  -4   0   53.29    7.41   0
  11   4   0   18.96   11.52   0
 -11  -4   0    9.22    8.22   0
  14  -5   0    9.26    8.30   0
  13  -5   0   13.67    7.62   0
  12  -5   0  174.60   10.80   0
  11  -5   0  449.88    8.59   0
  10  -5   0  765.26    9.75   0
   9  -5   0  191.05    9.27   0
   8  -5   0  378.15    7.89   0
   7  -5   0   44.54    6.38   0
   6  -5   0  305.44    9.83   0
   5  -5   0    3.22    6.00   0
   5  -5   0    2.91   11.74   0
   3  -5   0   36.88    6.04   0
  -3   5   0   41.14   11.23   0
   2  -5   0 1508.20   13.71   0
  -1   5   0  965.40   12.49   0
   1  -5   0  946.79   12.46   0
   0   5   0  143.31    6.39   0
   0  -5   0  139.73    8.24   0
  -1  -5   0 1361.70   12.27   0
   1   5   0 1525.63   13.78   0
   2   5   0  116.03    6.06   0
  -2  -5   0  129.31    6.03   0
  -3  -5   0  639.08    8.77   0
   3   5   0  716.37    9.20   0
   4   5   0   17.54    8.23   0
  -4  -5   0   13.00    8.11   0
  -5  -5   0  295.63    9.26   0
   5   5   0  303.84    9.55   0
   6   5   0  173.13    8.77   0
  -6  -5   0  188.50    8.88   0
   7   5   0  215.66    7.24   0
  -7  -5   0  226.55    7.28   0
   8   5   0   31.16    9.48   0
  -8  -5   0   25.66    6.58   0
   9   5   0  143.23    7.61   0
  -9  -5   0  158.92   10.69   0
 -10  -5   0  186.53    8.28   0
  10   5   0  208.32   11.30   0
  14  -6   0    6.34    8.00   0
  13  -6   0   13.58   10.39   0
  12  -6   0  110.00   10.40   0
  11  -6   0  100.34   10.32   0
  10  -6   0  471.44   10.38   0
   9  -6   0  709.78    9.30   0
   8  -6   0  630.25   11.04   0
   7  -6   0 1012.68   23.79   0
   7  -6   0  950.38   11.78   0
   6  -6   0  127.78    8.92   0
   5  -6   0  117.46    6.80   0
  -4   6   0    2.01   11.60   0
   4  -6   0    4.67    5.96   0
  -3   6   0    6.49    8.44   0
   3  -6   0    5.63    5.93   0
   2  -6   0  123.16    8.32   0
   1  -6   0 3083.49   18.27   0
  -1   6   0 3205.92   18.35   0
   0   6   0 1130.87   10.90   0
   0  -6   0 1172.91   11.06   0
  -1  -6   0 2976.00   17.27   0
   1   6   0 2875.24   16.06   0
  -2  -6   0  232.03    6.71   0
   2   6   0  266.63    8.82   0
  -3  -6   0  515.38    8.20   0
   3   6   0  576.24    8.44   0
   4   6   0 1109.75   12.12   0
  -4  -6   0 1118.15   12.05   0
   5   6   0  104.60    8.83   0
  -5  -6   0   75.57    6.21   0
  -6  -6   0  162.44    6.84   0
   6   6   0  203.10    9.41   0
  -7  -6   0   75.35    6.89   0
   7   6   0   79.17    9.48   0
  -8  -6   0   71.96    7.21   0
   8   6   0   72.88   10.06   0
  -9  -6   0   62.09   10.78   0
   9   6   0   61.66   10.67   0
 -10  -6   0   86.74   11.82   0
  10   6   0   65.41    8.63   0
  14  -7   0   71.38   12.13   0
  13  -7   0  165.01   11.19   0
  12  -7   0   -5.81    7.13   0
  11  -7   0   39.20    6.73   0
  10  -7   0   97.01    9.11   0
  10  -7   0  107.21   13.15   0
   9  -7   0  315.36   15.65   0
   9  -7   0  288.33    7.53   0
   8  -7   0   14.06    6.10   0
   7  -7   0  958.09   10.31   0
   6  -7   0 1919.00   14.93   0
   4  -7   0  204.60    8.94   0
  -4   7   0  210.84   12.95   0
   3  -7   0   18.96    7.79   0
   2  -7   0   69.81    6.04   0
   1  -7   0   55.48    5.76   0
  -1   7   0   50.50    5.80   0
   0   7   0  112.08    6.41   0
   0  -7   0  123.75    8.32   0
  -1  -7   0 1011.70   10.32   0
   1   7   0 1110.33   12.06   0
   2   7   0 1166.21   12.10   0
  -2  -7   0 1011.06   10.13   0
  -3  -7   0  236.53    6.85   0
   3   7   0  241.73    9.01   0
  -4  -7   0  289.20    7.09   0
   4   7   0  277.01    7.41   0
   5   7   0   27.31    6.00   0
  -5  -7   0   19.27    8.56   0
   6   7   0  187.34    7.29   0
  -6  -7   0  211.41    9.83   0
   7   7   0  150.51   10.10   0
  -7  -7   0  138.06    7.28   0
   8   7   0   -0.73    7.27   0
  -8  -7   0    4.91   10.10   0
   9   7   0   -1.29    7.92   0
  -9  -7   0    2.10    7.81   0
  14  -8   0   30.89   12.96   0
  14  -8   0   32.54    8.28   0
  13  -8   0  185.48   13.60   0
  13  -8   0  189.10    8.65   0
  12  -8   0  222.58   16.00   0
  12  -8   0  229.17    8.24   0
  11  -8   0   16.13    6.64   0
  11  -8   0   27.49   14.85   0
  10  -8   0   15.35    6.29   0
   9  -8   0   88.89    6.65   0
   8  -8   0   28.13    8.68   0
   7  -8   0  112.01    9.14   0
   6  -8   0 1317.75   11.41   0
   6  -8   0 1304.69   11.50   0
   5  -8   0 1150.36   10.73   0
   4  -8   0 2074.90   14.95   0
  -4   8   0 2187.79   24.25   0
   3  -8   0  419.07    8.09   0
   2  -8   0  454.73    7.92   0
  -1   8   0  459.11    9.97   0
   1  -8   0  437.14    9.59   0
   0  -8   0    7.09    5.68   0
   0   8   0    1.46    5.91   0
  -1  -8   0   19.73    5.77   0
   1   8   0   21.62    8.21   0
   2   8   0   29.45    5.96   0
  -2  -8   0   29.83    8.35   0
  -3  -8   0   73.18    8.48   0
   3   8   0   71.97    8.58   0
   4   8   0  294.08    7.49   0
  -4  -8   0  313.12    9.54   0
   5   8   0  540.23   10.92   0
  -5  -8   0  486.27    8.51   0
  -6  -8   0  147.32    7.30   0
   6   8   0  160.99    9.98   0
  -7  -8   0  180.08   10.76   0
   7   8   0  187.05   10.87   0
   8   8   0   14.96   11.07   0
  -8  -8   0   11.05    7.81   0
  14  -9   0   99.37    8.85   0
  13  -9   0   78.39    7.78   0
  12  -9   0  257.06    8.52   0
  11  -9   0  211.13    7.67   0
  10  -9   0  538.70   11.17   0
   9  -9   0  195.77    7.16   0
   8  -9   0   22.37    6.36   0
   7  -9   0    5.55    6.14   0
   7  -9   0    4.08    5.96   0
   6  -9   0  418.09   10.12   0
  -5   9   0    6.54   12.51   0
   5  -9   0    7.86    8.24   0
  -4   9   0  104.10    9.50   0
   4  -9   0   81.63    6.30   0
   3  -9   0  627.32   10.67   0
   2  -9   0  519.55    8.32   0
  -1   9   0 1644.33   13.79   0
   1  -9   0 1635.08   13.57   0
   0  -9   0   31.77    8.62   0
   0   9   0   22.14    6.14   0
  -1  -9   0   25.63    5.79   0
   1   9   0   19.41    8.32   0
   2   9   0   22.45    8.52   0
  -2  -9   0    3.43    5.97   0
  -3  -9   0   30.15    6.40   0
   3   9   0   21.93    6.02   0
  -4  -9   0   16.23    8.93   0
   4   9   0    6.20    6.34   0
  -5  -9   0  308.41    8.05   0
   5   9   0  321.60   10.62   0
  -6  -9   0  231.29    8.20   0
   6   9   0  243.50   11.09   0
   7   9   0  200.92    8.76   0
  -7  -9   0  230.31   11.84   0
  14 -10   0   56.60    8.76   0
  13 -10   0   99.16    8.33   0
  12 -10   0  218.91    8.39   0
  11 -10   0  122.56    7.25   0
  10 -10   0   94.27    9.38   0
   9 -10   0  260.83    7.95   0
   8 -10   0  142.12    6.95   0
   8 -10   0  159.70    9.44   0
   7 -10   0  201.07    9.44   0
   7 -10   0  193.38    7.16   0
   6 -10   0   89.27    6.51   0
   5 -10   0   95.52    6.31   0
  -5  10   0  107.65   12.41   0
   4 -10   0  157.70    9.07   0
  -4  10   0  161.07   10.24   0
   3 -10   0  145.35    6.66   0
   2 -10   0   57.18    8.53   0
  -1  10   0  734.13   11.02   0
   1 -10   0  711.77   10.92   0
   0  10   0  361.65    7.98   0
   0 -10   0  354.21    7.61   0
  -1 -10   0  326.51    7.46   0
   1  10   0  354.60    9.80   0
   2  10   0  180.34    7.17   0
  -2 -10   0  194.17    7.07   0
  -3 -10   0   14.41    9.21   0
   3  10   0    7.43    6.76   0
  -4 -10   0    5.64    6.71   0
   4  10   0   10.41    6.87   0
  -5 -10   0    2.98    7.13   0
   5  10   0   -3.28   10.11   0
   6  10   0   12.06   11.07   0
  -6 -10   0    4.40    7.75   0
  13 -11   0    9.71    7.98   0
  12 -11   0   18.01    7.70   0
  11 -11   0  244.57    8.19   0
  10 -11   0   75.45    7.23   0
  10 -11   0   76.17    7.37   0
   9 -11   0  238.12    7.81   0
   9 -11   0  294.88   10.29   0
   8 -11   0   92.74    7.45   0
   8 -11   0   95.09   10.27   0
   7 -11   0  215.40    7.49   0
   6 -11   0  247.97   10.47   0
   5 -11   0   78.93    9.25   0
  -5  11   0   87.68   11.73   0
   4 -11   0   53.73    8.86   0
  -4  11   0   72.65    9.46   0
   3 -11   0   81.57    6.36   0
   2 -11   0   51.51    6.07   0
  -1  11   0  188.88    9.30   0
   1 -11   0  173.02    9.32   0
   0  11   0  180.35    9.54   0
   0 -11   0  174.59    9.55   0
  -1 -11   0   40.00    6.67   0
   1  11   0   55.07    9.44   0
  -2 -11   0  432.88    8.57   0
   2  11   0  481.83   11.26   0
  -3 -11   0  101.30    7.27   0
   3  11   0  116.40   10.36   0
  -4 -11   0   77.08   10.52   0
   4  11   0   73.00    7.72   0
   5  11   0   10.65   11.01   0
  -5 -11   0   25.86   10.92   0
  13 -12   0   -3.46   11.83   0
  12 -12   0   41.37    8.23   0
  12 -12   0   44.03    8.01   0
  11 -12   0   41.55   10.74   0
  11 -12   0   30.36    7.67   0
  10 -12   0   98.12   10.50   0
  10 -12   0  103.20    7.56   0
   9 -12   0  302.50   11.08   0
   9 -12   0  276.93    8.61   0
   8 -12   0  497.88   11.40   0
   8 -12   0  509.93    9.11   0
   7 -12   0  175.65   10.30   0
   6 -12   0  406.65    8.67   0
  -5  12   0   89.89   10.17   0
   5 -12   0   87.89    9.53   0
   4 -12   0  156.51    9.59   0
  -4  12   0  170.96   10.67   0
   3 -12   0  149.08    9.36   0
   2 -12   0   32.27    6.55   0
  -1  12   0   91.72    6.98   0
   1 -12   0   98.08    9.55   0
   0  12   0  372.86    8.55   0
   0 -12   0  376.66    8.34   0
   1  12   0   68.70   10.18   0
  -1 -12   0   73.80    9.95   0
   2  12   0   81.88   10.47   0
  -2 -12   0   81.02    7.54   0
   3  12   0  136.11    8.12   0
  -3 -12   0  120.03    8.17   0
   4  12   0  127.23   11.87   0
  -4 -12   0  105.93    8.41   0
  12 -13   0   45.11    8.22   0
  12 -13   0   44.27   11.76   0
  11 -13   0    7.69    7.98   0
  11 -13   0    2.35   11.16   0
  10 -13   0    0.83   10.90   0
  10 -13   0    7.55    7.66   0
   9 -13   0   10.48    7.32   0
   9 -13   0   11.62   10.63   0
   8 -13   0   82.34    7.55   0
   8 -13   0   89.31   10.32   0
   7 -13   0  107.24   10.37   0
  -6  13   0  445.59   23.06   0
   6 -13   0  423.71   11.30   0
   5 -13   0  202.83    8.15   0
  -5  13   0  243.17   13.98   0
   4 -13   0   24.18    6.89   0
  -4  13   0   16.43   10.22   0
   3 -13   0  206.75    7.79   0
   2 -13   0   78.09    7.46   0
   1 -13   0  122.85   10.31   0
   0  13   0   -0.56   10.57   0
   0 -13   0    5.13    9.99   0
   1  13   0   71.10   10.68   0
  -1 -13   0   43.36    7.60   0
  -2 -13   0   47.10    7.88   0
   2  13   0   48.11   11.54   0
  -3 -13   0   59.29    8.45   0
   3  13   0   67.37    8.98   0
  11 -14   0  134.31    8.94   0
  11 -14   0  120.33   12.18   0
  10 -14   0   -1.50    8.17   0
  10 -14   0    7.70    8.06   0
   9 -14   0   36.29    7.98   0
   9 -14   0   23.97    7.98   0
   8 -14   0   30.88   10.98   0
   8 -14   0   27.16    7.68   0
   7 -14   0    5.47   10.31   0
  -6  14   0   42.73   17.92   0
   6 -14   0   39.22   10.22   0
   5 -14   0  357.58    8.97   0
  -5  14   0  389.53   13.82   0
   4 -14   0  229.97   10.74   0
  -4  14   0  246.90   12.33   0
   3 -14   0  403.37   12.06   0
  -3  14   0  405.51   10.47   0
   2 -14   0  146.01    8.06   0
   1 -14   0   64.91    7.97   0
   0 -14   0  173.02   11.80   0
   1  14   0   25.69   11.84   0
  -1 -14   0   30.70   11.52   0
  10 -15   0  128.46    9.33   0
  10 -15   0  159.31    9.35   0
   9 -15   0   82.12    8.67   0
   9 -15   0   78.87   12.04   0
   8 -15   0   38.13   11.61   0
   8 -15   0   60.75   11.69   0
   7 -15   0    9.41    7.74   0
  -6  15   0   13.26   16.64   0
   6 -15   0    6.82    7.78   0
   5 -15   0    3.82   10.98   0
  -5  15   0   17.02   14.00   0
   4 -15   0   20.28    8.03   0
  -4  15   0   24.06   11.54   0
   3 -15   0   81.47   11.56   0
  -3  15   0  101.82   12.15   0
   2 -15   0  142.35   11.92   0
   1 -15   0   17.98    8.54   0
   7 -16   0   59.72    9.05   0
  -6  16   0   21.51   18.26   0
   6 -16   0   26.68    8.54   0
   5 -16   0    3.47    8.32   0
  -5  16   0    0.82   12.48   0
  -3  16  -1   39.45    9.45   0
   3 -16   1   36.61    8.79   0
   4 -16   1   85.59   12.09   0
  -4  16  -1   85.15   13.39   0
   5 -16   1   54.86    8.67   0
  -5  16  -1   46.10   13.22   0
  -6  16  -1   29.97   17.98   0
   6 -16   1   13.74   11.93   0
   7 -16   1  125.69   12.44   0
   7 -16   1  115.73   12.98   0
   8 -16   1   14.62    8.88   0
   8 -16   1   24.40    8.83   0
   0 -15   1    2.00   11.75   0
   1 -15   1   51.42   11.62   0
   2 -15   1   15.51   11.32   0
   3 -15   1   12.08   11.16   0
  -3  15  -1   22.31   11.46   0
  -4  15  -1   77.51   11.77   0
   4 -15   1   66.66    8.09   0
  -5  15  -1  280.89   13.73   0
   5 -15   1  214.15    8.99   0
  -6  15  -1   70.78   17.65   0
   6 -15   1   66.47    8.20   0
   7 -15   1  107.39    8.54   0
   7 -15   1  147.78   11.96   0
   8 -15   1   73.84    8.56   0
   8 -15   1   79.43    8.40   0
   9 -15   1   70.50   12.31   0
   9 -15   1   57.53    8.97   0
  10 -15   1   89.16   12.39   0
  10 -15   1   81.73    9.10   0
   2  14  -1   92.72   12.34   0
  -2 -14   1   62.52    8.74   0
  -1 -14   1  240.91    8.94   0
   0 -14   1   93.86   11.16   0
   1 -14   1  102.57   10.54   0
   2 -14   1   77.29    7.36   0
  -3  14  -1    8.71   10.46   0
   3 -14   1    5.73    6.94   0
  -4  14  -1   23.80   10.55   0
   4 -14   1   25.41    7.36   0
  -5  14  -1   54.60   10.94   0
   5 -14   1   51.30   10.15   0
  -6  14  -1  145.54   17.55   0
   6 -14   1  134.31    8.15   0
   7 -14   1  296.92   11.56   0
   7 -14   1  241.12    8.55   0
   8 -14   1  264.23   11.71   0
   8 -14   1  223.65    8.95   0
   9 -14   1   35.13    7.94   0
   9 -14   1   56.72   11.15   0
  10 -14   1  148.65   12.07   0
  10 -14   1  140.83   12.26   0
  11 -14   1   64.70    8.74   0
  11 -14   1   53.03    8.67   0
   3  13  -1   25.88   11.81   0
  -3 -13   1   40.88    8.04   0
   2  13  -1   -3.16   10.93   0
  -2 -13   1    6.01    7.47   0
   1  13  -1   39.78   10.68   0
  -1 -13   1   40.47   10.36   0
   0 -13   1  338.52    8.67   0
   1 -13   1  325.18   11.07   0
   2 -13   1  393.32    8.49   0
   3 -13   1   15.83    9.39   0
  -3  13  -1    1.93    9.93   0
   4 -13   1   12.26    9.47   0
  -4  13  -1   15.53    9.92   0
   5 -13   1   37.99    9.85   0
  -5  13  -1   28.77   10.17   0
  -6  13  -1    9.84   14.36   0
   6 -13   1   17.17    7.34   0
   7 -13   1   10.20    7.02   0
   7 -13   1   18.84    7.05   0
   8 -13   1  293.69    8.66   0
   8 -13   1  279.42    8.60   0
   9 -13   1  176.59   11.02   0
   9 -13   1  169.13    8.25   0
  10 -13   1  189.29    8.72   0
  10 -13   1  196.50    8.68   0
  11 -13   1  142.97    8.64   0
  11 -13   1  134.03    8.66   0
  12 -13   1   58.42    8.79   0
  12 -13   1   84.92    8.71   0
   5  12  -1   60.09   12.42   0
  -5 -12   1   79.02   12.16   0
  -4 -12   1   85.35   11.00   0
   4  12  -1  100.54   11.26   0
  -3 -12   1   -2.77    7.19   0
   3  12  -1    6.01   10.57   0
   2  12  -1   77.04   10.34   0
  -2 -12   1   81.70    9.98   0
  -1 -12   1   24.21    6.87   0
   1  12  -1   25.10    9.77   0
   0 -12   1   87.67    7.06   0
   0  12  -1   94.76    9.80   0
   1 -12   1  137.31    7.22   0
   2 -12   1  505.11   11.02   0
  -3  12  -1  493.23   12.21   0
   3 -12   1  421.55    8.54   0
   4 -12   1  256.81   10.01   0
  -4  12  -1  276.39   11.37   0
   5 -12   1  253.64   10.01   0
  -5  12  -1  249.30   11.86   0
   6 -12   1   42.02    7.10   0
   7 -12   1  111.76    7.49   0
   7 -12   1  119.96   10.12   0
   8 -12   1   27.27    7.17   0
   8 -12   1   47.28    7.26   0
   9 -12   1    8.34    9.70   0
   9 -12   1    3.35    9.85   0
  10 -12   1   44.47   10.37   0
  10 -12   1   51.34   10.43   0
  11 -12   1  270.90   11.91   0
  12 -12   1  127.32   11.75   0
  13 -12   1   82.84    9.24   0
   6  11  -1   91.16   11.86   0
  -6 -11   1   69.56    8.35   0
  -5 -11   1   58.97    7.80   0
   5  11  -1   69.86   10.86   0
   4  11  -1  155.19    8.03   0
  -4 -11   1  151.40   10.58   0
   3  11  -1  362.17    8.72   0
  -3 -11   1  349.71    8.54   0
   2  11  -1   22.34    6.82   0
  -2 -11   1   35.62    9.30   0
  -1 -11   1   47.99    9.02   0
   1  11  -1   53.57    6.59   0
   0 -11   1   14.14    8.71   0
   0  11  -1   15.44    6.35   0
   1 -11   1   49.94    6.08   0
   2 -11   1   21.79    6.39   0
   3 -11   1  413.80    7.94   0
  -3  11  -1  485.06   11.77   0
  -4  11  -1  170.70   10.22   0
   4 -11   1  151.34    9.25   0
   5 -11   1  709.07    9.32   0
  -5  11  -1  873.50   17.94   0
   6 -11   1  452.32   10.72   0
   7 -11   1  192.82    7.33   0
   7 -11   1  210.24    7.62   0
   8 -11   1  105.26   10.32   0
   8 -11   1  119.48   10.10   0
   9 -11   1   14.77    6.74   0
  10 -11   1    5.46    6.72   0
  11 -11   1   15.04    7.05   0
  12 -11   1   76.00    8.05   0
  13 -11   1  123.56    8.87   0
   7  10  -1   20.61   11.39   0
  -7 -10   1   30.86   11.44   0
  -6 -10   1  163.24   11.29   0
   6  10  -1  173.40   11.39   0
  -5 -10   1  296.98   11.26   0
   5  10  -1  294.83   11.24   0
   4  10  -1   66.15    9.58   0
  -4 -10   1   54.48    6.83   0
  -3 -10   1  374.02   10.37   0
   3  10  -1  370.36   10.49   0
  -2 -10   1  131.40    9.05   0
   2  10  -1  123.57    6.79   0
   1  10  -1  405.00    8.40   0
  -1 -10   1  383.26    8.11   0
   0 -10   1  537.10   10.49   0
   0  10  -1  542.50   10.69   0
   1 -10   1   66.82    6.12   0
   2 -10   1   26.28    6.03   0
   3 -10   1  396.13    8.17   0
  -3  10  -1  475.65   11.82   0
  -4  10  -1   49.84    9.17   0
   4 -10   1   50.87    6.30   0
  -5  10  -1   88.04   12.33   0
   5 -10   1   76.45    8.79   0
   6 -10   1  823.02    9.92   0
   6 -10   1  884.29   11.98   0
   7 -10   1  387.54   10.27   0
   7 -10   1  410.61   10.54   0
   8 -10   1  509.19    8.84   0
   9 -10   1   11.32    9.22   0
  10 -10   1    7.75    6.81   0
  11 -10   1   54.15    7.05   0
  12 -10   1    3.53    7.47   0
  13 -10   1   -4.43   11.07   0
   8   9  -1   38.19    8.17   0
  -8  -9   1   35.28    8.18   0
  -7  -9   1    9.40   10.58   0
   7   9  -1   18.56   10.83   0
  -6  -9   1   24.37    9.79   0
   6   9  -1   23.35    9.86   0
   5   9  -1   89.87    9.46   0
  -5  -9   1   91.71    9.47   0
  -4  -9   1  112.45    6.76   0
   4   9  -1  131.38    9.49   0
  -3  -9   1  192.73    6.95   0
   3   9  -1  185.55    6.98   0
  -2  -9   1  106.19    8.71   0
   2   9  -1   98.20    6.52   0
   1   9  -1   56.10    8.61   0
  -1  -9   1   63.95    8.53   0
   0   9  -1  652.77   10.63   0
   0  -9   1  626.29   10.47   0
  -1   9  -1  170.88    6.70   0
   1  -9   1  182.04    8.78   0
   2  -9   1  225.00    7.11   0
  -3   9  -1    2.83    8.35   0
   3  -9   1    0.80    8.47   0
  -4   9  -1   72.05    9.36   0
   4  -9   1   63.81    6.04   0
   5  -9   1   52.80    8.52   0
  -5   9  -1   46.21   11.65   0
   6  -9   1  328.98    7.85   0
   6  -9   1  335.99    7.73   0
   7  -9   1  125.05    6.70   0
   8  -9   1  388.21    8.23   0
   9  -9   1  482.14   10.77   0
  10  -9   1  174.29    7.32   0
  11  -9   1  360.09    8.43   0
  12  -9   1    1.77    6.99   0
  12  -9   1    1.32   13.27   0
  13  -9   1    9.28   11.22   0
  13  -9   1    6.14   14.57   0
  14  -9   1   -5.00   12.13   0
  14  -9   1    1.24   15.51   0
   9   8  -1   99.68   11.87   0
  -9  -8   1   81.96    8.46   0
  -8  -8   1  228.40   11.55   0
   8   8  -1  214.59   11.53   0
  -7  -8   1   32.85    7.13   0
   7   8  -1   28.33    7.18   0
   6   8  -1   39.12    6.80   0
  -6  -8   1   28.64    6.66   0
   5   8  -1   38.35    8.95   0
  -5  -8   1   27.56    8.90   0
  -4  -8   1   29.50    6.15   0
   4   8  -1   40.27    8.64   0
   3   8  -1  133.64    6.47   0
  -3  -8   1  128.76    8.73   0
  -2  -8   1  657.65    8.86   0
   2   8  -1  704.29   10.91   0
   1   8  -1  951.50   11.72   0
  -1  -8   1  944.03   11.61   0
   0   8  -1 1160.96   12.76   0
   0  -8   1 1126.93   12.61   0
  -1   8  -1  673.10   11.00   0
   1  -8   1  644.28   10.91   0
   2  -8   1  310.58    7.59   0
   3  -8   1 1228.98   12.80   0
  -3   8  -1 1390.52   17.33   0
  -4   8  -1  261.93   12.87   0
   4  -8   1  212.60    6.93   0
   5  -8   1   52.86    6.10   0
   6  -8   1  376.19    9.84   0
   7  -8   1  592.98   10.61   0
   8  -8   1  152.82    9.54   0
   9  -8   1  292.88   15.72   0
   9  -8   1  256.66    7.44   0
  10  -8   1  125.16    7.00   0
  10  -8   1  140.90   13.46   0
  11  -8   1  603.00    9.48   0
  11  -8   1  608.19   16.45   0
  12  -8   1  213.93    8.36   0
  12  -8   1  236.99   13.34   0
  13  -8   1   29.51   12.10   0
  13  -8   1   50.46    7.97   0
  14  -8   1   11.52   13.15   0
  14  -8   1   12.25   11.92   0
  -9  -7   1   39.29   10.99   0
   9   7  -1   34.93    7.97   0
  -8  -7   1  448.59    9.27   0
   8   7  -1  438.45    9.25   0
  -7  -7   1  233.05   10.14   0
   7   7  -1  243.26   10.48   0
   6   7  -1   34.25    9.07   0
  -6  -7   1   32.16    9.08   0
   5   7  -1   89.88    6.47   0
  -5  -7   1   98.46    6.40   0
  -4  -7   1    4.08    8.26   0
   4   7  -1    3.55    5.94   0
  -3  -7   1   71.44    8.33   0
   3   7  -1   67.23    6.17   0
  -2  -7   1   -4.05    8.09   0
   2   7  -1    3.19    5.87   0
  -1  -7   1  549.38   10.41   0
   1   7  -1  553.71   10.35   0
   0   7  -1  851.91   11.66   0
   0  -7   1  853.85   11.53   0
  -1   7  -1 1921.38   15.29   0
   1  -7   1 1722.52   13.27   0
   2  -7   1  186.72    6.67   0
   3  -7   1  336.84    7.67   0
  -3   7  -1  408.53   12.09   0
  -4   7  -1  479.65   15.26   0
   5  -7   1  230.13    9.32   0
   6  -7   1  275.48    7.42   0
   7  -7   1   53.48    8.87   0
   7  -7   1   55.34   12.28   0
   8  -7   1  189.49   13.86   0
   8  -7   1  182.57    7.04   0
   9  -7   1  190.66   11.38   0
   9  -7   1  190.13    9.36   0
  10  -7   1  121.89   11.23   0
  10  -7   1  109.75    6.74   0
  11  -7   1  185.32    7.68   0
  12  -7   1  344.61   11.46   0
  13  -7   1   96.58    8.42   0
  14  -7   1  106.44    9.21   0
  10   6  -1   15.79   11.49   0
 -10  -6   1   21.81    7.94   0
   9   6  -1   17.21    7.14   0
  -9  -6   1   15.08    7.12   0
   8   6  -1   28.94    6.76   0
  -8  -6   1   23.93    6.89   0
  -7  -6   1  243.84    9.89   0
   7   6  -1  248.04    9.83   0
  -6  -6   1  158.29    9.09   0
   6   6  -1  167.28    9.12   0
  -5  -6   1 1976.94   13.34   0
   5   6  -1 2126.25   13.81   0
   4   6  -1  551.61   10.33   0
  -4  -6   1  496.87    8.25   0
  -3  -6   1  404.00    9.95   0
   3   6  -1  399.72   10.16   0
   2   6  -1  229.03    6.89   0
  -2  -6   1  250.21    9.00   0
   1   6  -1   73.58    5.98   0
  -1  -6   1  147.67    8.29   0
   0  -6   1  271.55    8.87   0
   0   6  -1  281.35    8.98   0
   1  -6   1  622.46    9.39   0
  -2   6  -1 2564.67   22.63   0
   2  -6   1 2267.28   16.86   0
   3  -6   1 2629.96   16.80   0
  -3   6  -1 2955.81   27.46   0
   4  -6   1 2051.59   16.08   0
   5  -6   1  509.87   16.96   0
   5  -6   1  474.95    8.71   0
   6  -6   1 1198.86   21.78   0
   6  -6   1 1127.66   12.59   0
   7  -6   1  696.47   10.94   0
   7  -6   1  718.93   15.63   0
   8  -6   1  288.44    9.59   0
   9  -6   1  139.78    6.83   0
  10  -6   1   55.61    6.50   0
  11  -6   1   95.59    9.72   0
  12  -6   1  184.01    8.26   0
  13  -6   1   79.45    8.13   0
  14  -6   1   49.31   12.09   0
 -11  -5   1  117.66    8.71   0
  11   5  -1  116.71   12.09   0
 -10  -5   1   32.09    7.33   0
  10   5  -1   32.80   10.27   0
   9   5  -1   32.29    6.92   0
  -9  -5   1   57.94    6.84   0
  -8  -5   1   28.89    6.63   0
   8   5  -1   41.72    6.55   0
  -7  -5   1   31.83    6.18   0
   7   5  -1   35.06    8.61   0
  -6  -5   1   -2.60    5.94   0
   6   5  -1    7.72    5.83   0
  -5  -5   1  715.42   10.85   0
   5   5  -1  744.49   11.05   0
   4   5  -1 1894.82   13.76   0
  -4  -5   1 1971.53   14.97   0
  -3  -5   1  546.17   10.41   0
   3   5  -1  570.54   10.32   0
  -2  -5   1 1183.36   11.85   0
   2   5  -1 1343.78   13.53   0
   1   5  -1    6.56    7.53   0
  -1  -5   1    2.52    5.22   0
   0  -5   1  315.82    7.96   0
   0   5  -1  335.59    9.72   0
   1  -5   1   82.88    6.51   0
  -2   5  -1   59.24    8.95   0
   2  -5   1   53.62    6.27   0
  -3   5  -1   97.55    9.98   0
   4  -5   1 1452.43   23.62   0
   4  -5   1 1484.04   14.58   0
   5  -5   1  471.35   14.25   0
   5  -5   1  458.69    9.07   0
   6  -5   1 1878.06   14.93   0
   7  -5   1 1483.43   13.61   0
  -8   5  -1   43.24    6.15   0
   8  -5   1   35.60    6.20   0
  -9   5  -1  514.75    8.25   0
   9  -5   1  572.18    8.84   0
 -10   5  -1   44.49    6.47   0
  10  -5   1   43.90    6.54   0
  11  -5   1   11.18    9.75   0
 -11   5  -1    9.36    9.45   0
 -12   5  -1   48.26    7.30   0
  12  -5   1   48.38    7.20   0
  13  -5   1  182.54   11.90   0
  14  -5   1   31.27    8.67   0
  11   4  -1   30.23   11.04   0
 -11  -4   1   11.80    7.62   0
  10   4  -1  287.43   11.01   0
 -10  -4   1  270.23   10.88   0
   9   4  -1  130.21    7.37   0
  -9  -4   1  141.12    9.87   0
  -8  -4   1   23.84    8.65   0
   8   4  -1   22.24    6.21   0
   7   4  -1    8.03    6.12   0
  -7  -4   1    9.12    8.23   0
   6   4  -1  188.88    8.81   0
  -6  -4   1  170.58    6.76   0
   5   4  -1  176.89    9.12   0
  -5  -4   1  162.75    6.62   0
   4   4  -1  415.05    8.19   0
  -4  -4   1  442.43    8.22   0
   3   4  -1  235.78    8.95   0
  -3  -4   1  212.10    6.95   0
   2   4  -1 1081.65   13.46   0
  -2  -4   1 1080.35   13.49   0
   1   4  -1 2451.64   18.69   0
  -1  -4   1 2497.48   19.72   0
   0   4  -1  938.79   14.13   0
   0  -4   1  859.03   12.44   0
   1  -4   1 2177.71   18.74   0
  -2   4  -1    2.05    8.75   0
   3  -4   1  878.46   13.47   0
   3  -4   1  912.91   19.53   0
   4  -4   1    4.06    9.12   0
   4  -4   1   -2.94    6.03   0
   5  -4   1   35.61    6.11   0
  -5   4  -1   27.03    6.29   0
   6  -4   1  351.80    7.97   0
  -6   4  -1  343.11    7.63   0
   7  -4   1 1407.81   11.71   0
  -7   4  -1 1436.39   11.74   0
  -8   4  -1  149.40    6.63   0
   8  -4   1  146.02    6.84   0
  -9   4  -1  350.87    7.85   0
   9  -4   1  330.05    7.85   0
 -10   4  -1  120.97    6.80   0
  10  -4   1  131.39    9.52   0
  11  -4   1   78.91    7.22   0
 -11   4  -1   89.78    9.63   0
 -12   4  -1  153.92   10.88   0
  12  -4   1  147.14    8.04   0
 -13   4  -1    6.53   11.05   0
  13  -4   1    1.77   11.03   0
 -14   4  -1    9.61   12.36   0
  14  -4   1    9.50    8.58   0
 -12  -3   1  200.11   12.68   0
  12   3  -1  181.83    9.43   0
 -11  -3   1   52.15    7.74   0
  11   3  -1   57.59   10.58   0
 -10  -3   1  189.84    7.58   0
  10   3  -1  158.59   10.18   0
  -9  -3   1  213.42    9.87   0
   9   3  -1  190.76    7.24   0
   8   3  -1  138.14    8.78   0
  -8  -3   1  136.31    6.67   0
   7   3  -1  756.68    9.37   0
  -7  -3   1  758.38    9.63   0
  -6  -3   1  185.00    6.80   0
   6   3  -1  195.29    7.04   0
  -5  -3   1    6.57    5.32   0
   5   3  -1   10.28    5.33   0
   4   3  -1  479.49    8.60   0
  -4  -3   1  650.60   10.59   0
  -3  -3   1  248.65    9.37   0
   3   3  -1  246.79    9.19   0
   2   3  -1   18.03    7.89   0
  -2  -3   1   18.10    7.90   0
  -1  -3   1  162.64   10.10   0
   1   3  -1  152.16    7.74   0
   0  -3   1  188.58   11.65   0
   0   3  -1  201.53   11.63   0
   2  -3   1 1475.17   18.57   0
  -2   3  -1 1480.55   24.72   0
   2  -3   1 1501.23   24.99   0
   3  -3   1    7.05    7.21   0
  -3   3  -1   10.17    6.65   0
   4  -3   1  233.20    9.75   0
  -4   3  -1  223.60    7.67   0
  -5   3  -1    8.48    5.90   0
   5  -3   1    5.58    6.03   0
  -6   3  -1    1.10    5.73   0
   6  -3   1   -7.45    8.37   0
  -7   3  -1  249.23    6.99   0
   7  -3   1  242.09    9.15   0
   8  -3   1  413.20    7.94   0
  -8   3  -1  413.32    7.79   0
   9  -3   1  517.87   10.79   0
  -9   3  -1  554.54   10.88   0
  10  -3   1  391.70    8.33   0
 -10   3  -1  403.71    8.22   0
  11  -3   1   23.62    7.05   0
 -11   3  -1   23.28    6.74   0
  12  -3   1  151.68   11.17   0
 -12   3  -1  134.59    7.93   0
 -13   3  -1   36.83   11.48   0
  13  -3   1   58.04   11.31   0
  12   2  -1   44.90    7.96   0
 -12  -2   1   54.63    7.92   0
  11   2  -1   74.76    7.47   0
 -11  -2   1   87.85    7.46   0
 -10  -2   1  320.09   10.64   0
  10   2  -1  312.16   10.66   0
  -9  -2   1  653.98   11.28   0
   9   2  -1  683.79   11.33   0
  -8  -2   1   66.38    6.28   0
   8   2  -1   71.22    8.65   0
   7   2  -1  984.11   11.92   0
  -7  -2   1  935.20    9.99   0
   6   2  -1  763.14   11.13   0
  -6  -2   1  657.13    9.11   0
  -5  -2   1  635.29   10.62   0
   5   2  -1  660.83   10.78   0
   4   2  -1  541.09   10.62   0
  -4  -2   1  552.42   10.77   0
  -3  -2   1  394.17   10.76   0
   3   2  -1  348.48    8.73   0
  -2  -2   1   26.50    9.09   0
   2   2  -1   30.12    9.68   0
  -1  -2   1  866.67   18.39   0
   1   2  -1  876.86   18.31   0
   0  -2   1 6801.29   48.95   0
   1  -2   1 1421.50   25.53   0
   1  -2   1 1338.28   21.15   0
  -2   2  -1 9121.94   40.05   0
   2  -2   1 9999.99   42.64   0
   3  -2   1  150.66   10.21   0
  -3   2  -1  143.01    7.76   0
  -4   2  -1 1278.87   14.02   0
   4  -2   1 1161.73   12.22   0
   5  -2   1  605.73    9.29   0
  -5   2  -1  631.59    9.22   0
   6  -2   1   11.29    5.52   0
  -6   2  -1    0.93    5.65   0
   7  -2   1    1.81    5.58   0
  -7   2  -1   -3.51    8.05   0
  -8   2  -1   70.05    8.47   0
   8  -2   1   76.64    8.74   0
  -9   2  -1    5.87    8.52   0
   9  -2   1   11.10    8.29   0
 -10   2  -1  295.88   10.01   0
  10  -2   1  267.71    9.82   0
 -11   2  -1  349.01    8.49   0
  11  -2   1  354.03   10.83   0
 -12   2  -1  331.37    8.89   0
  12  -2   1  332.09   11.83   0
  13  -2   1  111.18   11.91   0
 -13   2  -1  130.28   11.83   0
  13   1  -1   13.71    8.37   0
 -13  -1   1   23.29    8.42   0
  12   1  -1   26.14   10.58   0
 -12  -1   1   32.00   10.69   0
  11   1  -1   19.99    6.98   0
 -11  -1   1   21.93    9.91   0
 -10  -1   1    8.07    6.26   0
  10   1  -1    9.97    6.20   0
   9   1  -1  346.31    7.71   0
  -9  -1   1  364.92    8.00   0
  -8  -1   1  180.41    7.00   0
   8   1  -1  230.34    9.63   0
   7   1  -1  805.86    9.90   0
  -7  -1   1  881.15   11.82   0
  -6  -1   1  986.57   11.97   0
   6   1  -1  869.08   10.28   0
   5   1  -1    7.75    5.34   0
  -5  -1   1    7.81    7.41   0
   4   1  -1  644.61   10.15   0
  -4  -1   1  668.17   11.81   0
   3   1  -1   49.47    6.59   0
  -3  -1   1   48.74    9.14   0
   2   1  -1  758.88   16.91   0
  -2  -1   1  772.72   17.16   0
   1   1  -1    7.60    8.49   0
  -1  -1   1    6.55    8.74   0
   0  -1   1  747.22   19.89   0
   0   1  -1  813.92   27.21   0
  -1   1  -1 1072.53   18.24   0
   1  -1   1 1101.67   18.30   0
  -2   1  -1 1191.28   15.50   0
   2  -1   1 1195.28   17.23   0
  -3   1  -1  118.86    7.27   0
   3  -1   1  124.33    7.35   0
  -4   1  -1 1075.74   12.90   0
   4  -1   1 1078.78   12.84   0
  -5   1  -1 3600.76   19.10   0
   5  -1   1 3644.36   19.40   0
  -6   1  -1  424.85    9.57   0
   6  -1   1  412.17    9.50   0
   7  -1   1  156.12    6.46   0
  -7   1  -1  158.77    6.38   0
   8  -1   1  185.76    6.92   0
  -8   1  -1  194.71    6.76   0
  -9   1  -1   25.06    8.50   0
   9  -1   1   34.57    8.98   0
 -10   1  -1    9.21    6.27   0
  10  -1   1    2.66    8.96   0
  11  -1   1  133.61    7.61   0
 -11   1  -1  152.33   10.21   0
 -12   1  -1   94.11    7.98   0
  12  -1   1   93.36    8.01   0
  13  -1   1  122.45    8.98   0
 -13   1  -1  147.48    8.92   0
  13   0  -1  134.31   11.84   0
 -13   0   1  109.06    8.70   0
 -12   0   1  135.57    7.73   0
  12   0  -1  138.80   10.68   0
 -11   0   1    5.84    9.23   0
  11   0  -1    5.14    6.52   0
 -10   0   1    6.69    6.21   0
  10   0  -1    2.19    6.23   0
  -9   0   1    3.23    6.05   0
   9   0  -1    1.86    5.95   0
   8   0  -1   31.80    6.08   0
  -8   0   1   31.27    8.51   0
   7   0  -1  201.23    6.76   0
  -7   0   1  206.94    9.03   0
   6   0  -1 1816.04   13.62   0
  -6   0   1 1921.92   14.94   0
   5   0  -1 1176.16   13.37   0
  -5   0   1 1123.71   11.89   0
   4   0  -1 1778.69   15.89   0
  -4   0   1 1947.46   17.73   0
  -3   0   1    7.60   10.16   0
   3   0  -1    8.46    7.25   0
  -2   0   1 4599.60   38.69   0
   2   0  -1 4549.81   38.03   0
  -1   0   1 3050.59   39.29   0
   1   0   1   74.17    9.33   0
  -1   0  -1   76.67    7.37   0
  -2   0  -1 5565.50   28.86   0
   2   0   1 5665.95   29.16   0
   3   0   1   11.99    8.27   0
  -3   0  -1   12.84    8.36   0
  -4   0  -1   98.86    6.35   0
   4   0   1   94.97    6.39   0
  -5   0  -1 1325.29   11.32   0
   5   0   1 1319.73   11.41   0
  -6   0  -1  892.59   11.00   0
   6   0   1  816.55    9.50   0
  -7   0  -1 1178.12   10.37   0
   7   0   1 1205.47   10.61   0
   8   0   1  614.62    8.79   0
  -8   0  -1  601.91    8.63   0
  -9   0  -1   79.24    6.55   0
   9   0   1   69.77    8.94   0
 -10   0  -1  173.65    7.48   0
  10   0   1  163.91    7.61   0
 -11   0  -1   39.44   10.07   0
  11   0   1   27.01   10.18   0
  12   0   1   -3.88    7.67   0
 -12   0  -1    4.12   10.88   0
 -14   1   1  111.84    9.43   0
  14  -1  -1  104.29    9.35   0
 -13   1   1   72.69   11.14   0
  13  -1  -1   53.22    8.12   0
 -12   1   1  322.69    8.59   0
  12  -1  -1  300.81    8.58   0
 -11   1   1  438.45    8.52   0
  11  -1  -1  452.35   11.00   0
  10  -1  -1  197.62    9.59   0
 -10   1   1  199.09    7.12   0
  -9   1   1  226.09    7.14   0
   9  -1  -1  225.99    7.29   0
   8  -1  -1   38.90    5.95   0
  -8   1   1   32.60    5.89   0
  -7   1   1   57.14    6.03   0
   7  -1  -1   61.36    6.18   0
  -6   1   1    8.58    5.54   0
   6  -1  -1   15.77    5.38   0
  -5   1   1 1149.80   13.49   0
   5  -1  -1 1115.01   12.09   0
  -4   1   1 2075.41   17.77   0
   4  -1  -1 2076.71   17.64   0
  -3   1   1 6930.09   37.20   0
   3  -1  -1 6987.76   37.53   0
  -1   1   1 2138.06   26.10   0
   1  -1  -1 2162.52   26.46   0
  -1   1   1 2024.15   35.36   0
   0   1   1  944.02   15.97   0
   0  -1  -1  927.64   15.93   0
  -1  -1  -1  124.38   10.70   0
   1   1   1  125.20   10.62   0
   2   1   1 1230.60   13.78   0
  -2  -1  -1 1239.83   13.83   0
   3   1   1  430.30    8.41   0
  -3  -1  -1  465.86    8.75   0
  -4  -1  -1  124.49    6.12   0
   4   1   1  124.50    6.52   0
   5   1   1 2026.11   14.72   0
  -5  -1  -1 1925.23   13.16   0
  -6  -1  -1 1028.47    9.91   0
   6   1   1 1055.09   10.12   0
   7   1   1  339.14    7.43   0
  -7  -1  -1  341.78    7.26   0
   8   1   1  388.04    9.93   0
  -8  -1  -1  405.74    9.54   0
  -9  -1  -1  181.91    9.35   0
   9   1   1  168.60    9.71   0
  10   1   1  598.54    9.36   0
 -10  -1  -1  650.19    9.35   0
 -11  -1  -1   38.39    7.38   0
  11   1   1   32.13    7.47   0
  12   1   1   12.43   11.23   0
 -12  -1  -1   12.36    8.06   0
  14  -2  -1   72.77   12.38   0
 -14   2   1   75.02   12.21   0
  13  -2  -1   23.57   10.86   0
 -13   2   1   14.62   10.90   0
  12  -2  -1   11.56    7.05   0
 -12   2   1   12.27    9.81   0
 -11   2   1  478.44   11.10   0
  11  -2  -1  454.78    8.86   0
  10  -2  -1  500.25    8.56   0
 -10   2   1  493.34    8.85   0
  -9   2   1 1151.43   12.78   0
   9  -2  -1 1164.99   12.84   0
   8  -2  -1  199.04    9.36   0
  -8   2   1  167.99    6.68   0
   7  -2  -1   38.16    5.94   0
  -7   2   1   40.82    8.30   0
  -6   2   1  493.75   10.87   0
   6  -2  -1  478.67    8.93   0
  -5   2   1   72.03    6.38   0
   5  -2  -1   68.19    6.33   0
   4  -2  -1   25.46    9.44   0
   2  -2  -1 5799.83   33.21   0
   1  -2  -1  621.37   14.20   0
  -1   2   1  598.80   12.32   0
   0  -2  -1 4351.46   26.95   0
   0   2   1 3953.06   25.68   0
   1   2   1  234.85   10.67   0
  -1  -2  -1  219.13    8.40   0
  -2  -2  -1 1436.67   13.48   0
   2   2   1 1442.14   13.29   0
   3   2   1  908.92   11.69   0
  -3  -2  -1  850.24   10.06   0
   4   2   1  756.44    9.28   0
  -4  -2  -1  756.90    9.23   0
   5   2   1  206.90    6.64   0
  -5  -2  -1  207.22    8.47   0
  -6  -2  -1  180.09    6.38   0
   6   2   1  179.32    6.83   0
   7   2   1  143.76    6.73   0
  -7  -2  -1  159.99    9.00   0
  -8  -2  -1  205.75    6.90   0
   8   2   1  201.55    6.93   0
   9   2   1   27.77    9.10   0
  -9  -2  -1   28.88    6.45   0
 -10  -2  -1  133.75    7.39   0
  10   2   1  147.86   10.24   0
 -11  -2  -1  183.55   11.35   0
  11   2   1  148.95   11.39   0
 -12  -2  -1   43.54   11.85   0
  12   2   1   38.67    8.67   0
  14  -3  -1   17.87   11.55   0
 -13   3   1   13.45   10.46   0
  13  -3  -1   -0.52    7.71   0
 -12   3   1    0.19    7.05   0
  12  -3  -1    7.90    9.71   0
 -11   3   1  154.36    7.10   0
  11  -3  -1  139.07    7.38   0
 -10   3   1   71.88    6.77   0
  10  -3  -1   75.01    6.92   0
   9  -3  -1  382.63    8.04   0
  -9   3   1  391.35    8.23   0
  -8   3   1 1032.49   12.07   0
   8  -3  -1 1043.63   12.15   0
   7  -3  -1  464.60   10.31   0
  -7   3   1  445.02   10.17   0
   6  -3  -1 2363.21   16.00   0
   5  -3  -1    8.91    5.99   0
   4  -3  -1  220.66    8.10   0
   2  -3  -1 1638.85   16.32   0
   1  -3  -1 1265.04   14.61   0
  -1   3   1 1280.33   14.53   0
   0  -3  -1 1442.53   14.58   0
   0   3   1 1453.67   14.44   0
  -1  -3  -1 3628.34   20.14   0
   1   3   1 3658.81   20.07   0
  -2  -3  -1 2064.92   14.57   0
   2   3   1 2104.10   14.69   0
   3   3   1  546.85    9.96   0
  -3  -3  -1  529.91    8.49   0
   4   3   1  101.47    5.92   0
  -4  -3  -1  101.37    6.03   0
  -5  -3  -1  614.27    8.29   0
   5   3   1  624.92    8.71   0
   6   3   1   26.43    8.37   0
  -6  -3  -1   32.20    8.28   0
   7   3   1   60.24    8.35   0
  -7  -3  -1   58.23    8.54   0
   8   3   1   71.74    6.56   0
  -8  -3  -1   65.81    8.92   0
   9   3   1  221.88   10.37   0
  -9  -3  -1  219.57    7.59   0
  10   3   1   77.91    7.78   0
 -10  -3  -1   88.00   10.53   0
 -11  -3  -1   98.64    8.49   0
  11   3   1   96.54    8.65   0
  14  -4  -1  133.20   12.13   0
  13  -4  -1   43.33    7.59   0
  12  -4  -1   58.68    7.09   0
  11  -4  -1  151.82    7.30   0
  10  -4  -1  349.32    8.10   0
   9  -4  -1  224.38    7.37   0
   8  -4  -1  469.99    8.34   0
   7  -4  -1  343.93    9.58   0
   6  -4  -1 1972.22   15.94   0
   5  -4  -1 2204.08   16.75   0
   3  -4  -1  332.65    8.34   0
  -2   4   1  175.49    7.32   0
   2  -4  -1  160.15    7.45   0
  -1   4   1   87.88    8.59   0
   1  -4  -1   75.93    6.50   0
   0  -4  -1   30.68    5.80   0
   0   4   1   21.68    5.67   0
   1   4   1 1218.13   12.71   0
  -1  -4  -1 1238.41   12.82   0
  -2  -4  -1  287.96    7.24   0
   2   4   1  317.63    8.67   0
  -3  -4  -1 1750.34   13.78   0
   3   4   1 1723.94   12.37   0
   4   4   1  319.86    7.49   0
  -4  -4  -1  322.11    8.93   0
  -5  -4  -1  302.83    7.23   0
   5   4   1  335.31    9.31   0
  -6  -4  -1  121.18    8.71   0
   6   4   1   95.39    6.56   0
   7   4   1    8.34    8.64   0
  -7  -4  -1    8.19    6.01   0
  -8  -4  -1  242.05    7.42   0
   8   4   1  305.92   10.30   0
  -9  -4  -1   10.55    6.88   0
   9   4   1   -0.38    7.04   0
  10   4   1   42.49   10.77   0
 -10  -4  -1   32.35   10.80   0
  14  -5  -1   70.02   11.66   0
  13  -5  -1  125.52   10.94   0
  12  -5  -1  141.93    7.52   0
  11  -5  -1  244.77    7.71   0
  10  -5  -1   10.27    8.70   0
   9  -5  -1   42.44    6.24   0
   8  -5  -1  128.34    6.74   0
   7  -5  -1   95.52    6.54   0
   6  -5  -1  234.64    7.43   0
   4  -5  -1  419.78    8.59   0
   3  -5  -1 1562.47   13.21   0
   2  -5  -1   29.27    5.70   0
  -2   5   1   38.41    7.89   0
  -1   5   1   39.47    5.56   0
   1  -5  -1   50.99    7.97   0
   0   5   1   -2.10    5.27   0
   0  -5  -1   22.28    7.67   0
   1   5   1  475.66    9.61   0
  -1  -5  -1  431.73    7.84   0
  -2  -5  -1    8.76    7.58   0
   2   5   1   12.52    7.49   0
  -3  -5  -1  272.80    6.75   0
   3   5   1  295.10    9.39   0
  -4  -5  -1  330.10    7.27   0
   4   5   1  336.53    7.37   0
  -5  -5  -1  464.26    9.86   0
   5   5   1  473.41    9.94   0
   6   5   1  573.72    8.56   0
  -6  -5  -1  601.92    8.37   0
   7   5   1   38.02    9.08   0
  -7  -5  -1   24.31    9.03   0
  -8  -5  -1  156.48    7.53   0
   8   5   1  181.64   10.30   0
  -9  -5  -1   22.01    7.43   0
   9   5   1   22.55   10.43   0
  10   5   1   16.76    8.05   0
 -10  -5  -1    7.06   11.37   0
  14  -6  -1   98.24   11.67   0
  13  -6  -1  346.27    9.13   0
  12  -6  -1  100.38    7.56   0
  11  -6  -1  300.54   10.81   0
  10  -6  -1  169.32    7.25   0
   9  -6  -1  221.98    9.23   0
   8  -6  -1  337.08   16.30   0
   8  -6  -1  336.37    7.94   0
   7  -6  -1  162.31    8.85   0
   6  -6  -1  485.60   10.93   0
   5  -6  -1 2453.05   15.31   0
   4  -6  -1  956.07   12.14   0
  -4   6   1  986.32   25.48   0
   3  -6  -1  881.60   10.44   0
  -2   6   1 2004.40   14.04   0
   2  -6  -1 1937.20   14.09   0
   1  -6  -1 1433.98   11.83   0
  -1   6   1 1571.76   12.28   0
   0   6   1 2086.26   13.55   0
   0  -6  -1 2132.01   14.90   0
   1   6   1    9.18    7.30   0
  -1  -6  -1    8.77    5.43   0
   2   6   1   33.16    5.52   0
  -2  -6  -1   36.73    5.96   0
   3   6   1   15.20    5.86   0
  -3  -6  -1   21.19    8.40   0
   4   6   1   -1.95    5.98   0
  -4  -6  -1    6.67    5.76   0
   5   6   1   70.40    8.58   0
  -5  -6  -1   76.19    8.43   0
   6   6   1  642.03   11.09   0
  -6  -6  -1  557.87    8.66   0
   7   6   1  365.03    8.32   0
  -7  -6  -1  378.88   10.57   0
  -8  -6  -1  197.04    7.97   0
   8   6   1  176.71    8.14   0
  -9  -6  -1   82.15    8.42   0
   9   6   1   73.80    8.48   0
  14  -7  -1    7.31    8.03   0
  13  -7  -1  193.09    8.24   0
  12  -7  -1  247.06    8.28   0
  11  -7  -1  536.74   11.52   0
  10  -7  -1  360.79    7.94   0
  10  -7  -1  340.25   17.18   0
  10  -7  -1  387.93   18.44   0
   9  -7  -1   14.56    8.58   0
   8  -7  -1  610.31    9.01   0
   7  -7  -1  306.44    7.54   0
   6  -7  -1  128.00    6.40   0
   5  -7  -1   65.75    8.12   0
   4  -7  -1 1050.63   12.21   0
   3  -7  -1  185.99    8.86   0
  -2   7   1  468.75    9.70   0
   2  -7  -1  441.82    9.68   0
  -1   7   1  839.34    9.49   0
   1  -7  -1  816.62    9.40   0
   0  -7  -1 1140.34   11.98   0
   0   7   1 1116.30   10.31   0
  -1  -7  -1 1366.55   12.79   0
   1   7   1 1345.84   11.17   0
  -2  -7  -1   17.72    5.72   0
   2   7   1   15.31    5.91   0
  -3  -7  -1  155.68    6.69   0
   3   7   1  168.43    6.69   0
   4   7   1   42.93    5.94   0
  -4  -7  -1   62.89    8.63   0
  -5  -7  -1   62.51    8.97   0
   5   7   1   41.02    6.43   0
   6   7   1   76.20    7.04   0
  -6  -7  -1   80.26    9.52   0
   7   7   1  126.62   10.40   0
  -7  -7  -1  109.13    7.37   0
  -8  -7  -1   78.86   11.27   0
   8   7   1   51.85    8.21   0
  14  -8  -1    4.12   14.20   0
  14  -8  -1    2.23   14.83   0
  14  -8  -1   16.18   11.37   0
  13  -8  -1    7.50   10.41   0
  13  -8  -1    0.73   15.98   0
  13  -8  -1    2.13   13.19   0
  12  -8  -1   14.68   10.07   0
  11  -8  -1  122.11    7.31   0
  10  -8  -1  742.57   11.68   0
   9  -8  -1  311.77    7.80   0
   8  -8  -1  601.80    8.85   0
   7  -8  -1  829.71   11.56   0
   7  -8  -1  830.79   11.59   0
   6  -8  -1  215.27    7.04   0
   5  -8  -1  404.88    7.96   0
   4  -8  -1   32.70    5.96   0
   3  -8  -1    3.90    7.71   0
   2  -8  -1  253.40    6.81   0
  -2   8   1  245.86    6.84   0
  -1   8   1  611.22    8.70   0
   1  -8  -1  594.50    8.46   0
   0   8   1  427.71    7.62   0
   0  -8  -1  454.86    9.80   0
  -1  -8  -1  762.97    9.23   0
   1   8   1  815.40   11.13   0
   2   8   1  145.57    8.72   0
  -2  -8  -1  124.34    6.41   0
  -3  -8  -1  721.78    8.80   0
   3   8   1  700.93    8.82   0
  -4  -8  -1  643.14   10.85   0
   4   8   1  683.15   11.18   0
  -5  -8  -1   37.16    9.56   0
   5   8   1   31.92    6.65   0
   6   8   1    8.20    6.83   0
  -6  -8  -1    1.45    6.86   0
  -7  -8  -1   77.40    7.88   0
   7   8   1   90.12   11.06   0
  -8  -8  -1   11.89    8.30   0
   8   8   1    1.47   11.53   0
  14  -9  -1   55.34   11.65   0
  13  -9  -1   48.82   10.80   0
  12  -9  -1    8.90    7.12   0
  11  -9  -1   23.86    6.92   0
  10  -9  -1   17.37    9.10   0
   9  -9  -1  195.26    9.24   0
   8  -9  -1  466.05    8.50   0
   8  -9  -1  471.06    8.64   0
   7  -9  -1 1048.20   10.53   0
   6  -9  -1  102.37    8.73   0
  -5   9   1  375.80   15.55   0
   5  -9  -1  349.45    9.62   0
   4  -9  -1  198.88    6.85   0
   3  -9  -1  258.58    7.24   0
  -2   9   1  484.78    9.94   0
   2  -9  -1  409.92    7.99   0
   1  -9  -1   56.12    8.36   0
  -1   9   1   53.04    8.43   0
   0   9   1   96.15    6.38   0
   0  -9  -1  106.68    6.38   0
  -1  -9  -1  416.88    7.66   0
   1   9   1  403.41    7.61   0
   2   9   1   67.37    6.19   0
  -2  -9  -1   75.92    8.84   0
  -3  -9  -1   55.03    6.42   0
   3   9   1   55.44    6.70   0
  -4  -9  -1  377.00   10.63   0
   4   9   1  349.59   10.69   0
   5   9   1  153.55    7.56   0
  -5  -9  -1  164.02   10.35   0
   6   9   1  244.47   11.73   0
  -6  -9  -1  212.57    8.58   0
  -7  -9  -1   16.86   11.53   0
   7   9   1    7.57    8.33   0
  14 -10  -1   68.13   12.11   0
  13 -10  -1  251.46   11.84   0
  12 -10  -1  112.22    8.09   0
  11 -10  -1   21.23    6.82   0
  10 -10  -1    7.18    8.96   0
  10 -10  -1   -4.46    6.52   0
   9 -10  -1   62.90    6.60   0
   9 -10  -1   67.96    6.71   0
   8 -10  -1   19.01    6.38   0
   8 -10  -1   29.95    6.39   0
   7 -10  -1  255.08    7.34   0
   6 -10  -1  432.75    8.32   0
  -5  10   1  752.66   16.29   0
   5 -10  -1  708.36   11.02   0
   4 -10  -1  761.77    9.59   0
   3 -10  -1   96.05    8.79   0
   2 -10  -1  236.04    9.08   0
  -2  10   1  227.28    7.08   0
  -1  10   1  186.61    6.75   0
   1 -10  -1  187.07    6.86   0
   0  10   1   49.32    8.82   0
   0 -10  -1   38.30    6.20   0
  -1 -10  -1    5.91    5.86   0
   1  10   1    7.65    6.35   0
  -2 -10  -1  278.57   10.07   0
   2  10   1  293.29   10.00   0
   3  10   1  160.39    9.96   0
  -3 -10  -1  149.03    9.91   0
  -4 -10  -1  189.38    8.07   0
   4  10   1  204.84    8.18   0
  -5 -10  -1   31.68   10.76   0
   5  10   1   33.50    7.74   0
   6  10   1   30.77    8.35   0
  -6 -10  -1   45.95   11.52   0
  14 -11  -1   20.81    8.41   0
  13 -11  -1   84.21   11.78   0
  12 -11  -1  310.90   12.00   0
  12 -11  -1  303.27    9.12   0
  11 -11  -1  104.51    7.54   0
  11 -11  -1   97.49   10.21   0
  10 -11  -1   76.17    7.10   0
  10 -11  -1   72.58    7.12   0
   9 -11  -1   11.05    9.26   0
   9 -11  -1   12.35    6.71   0
   8 -11  -1   -1.26    6.57   0
   8 -11  -1    6.53    9.31   0
   7 -11  -1   14.00    9.07   0
   6 -11  -1   16.09    6.33   0
   5 -11  -1   55.34    9.17   0
  -5  11   1   69.83    9.77   0
   4 -11  -1  556.70   10.51   0
   3 -11  -1  252.77    7.34   0
   2 -11  -1  270.19    9.60   0
  -2  11   1  254.56    7.49   0
   1 -11  -1  127.63    6.94   0
  -1  11   1  131.21    6.75   0
   0 -11  -1   11.21    8.89   0
   0  11   1   11.58    8.91   0
   1  11   1   34.68    6.46   0
  -1 -11  -1   34.96    6.71   0
   2  11   1    7.35    6.68   0
  -2 -11  -1   -4.02    6.89   0
   3  11   1    0.80    7.14   0
  -3 -11  -1    9.11    9.97   0
  -4 -11  -1   50.28   11.01   0
   4  11   1   42.44    8.01   0
   5  11   1   91.86    8.90   0
  -5 -11  -1   99.24    8.88   0
  13 -12  -1   13.33    8.39   0
  13 -12  -1   29.51    8.31   0
  12 -12  -1  147.64   11.48   0
  12 -12  -1  152.75    8.24   0
  11 -12  -1   89.83    7.92   0
  11 -12  -1   89.91    7.76   0
  10 -12  -1  227.80    8.48   0
  10 -12  -1  232.49    8.56   0
   9 -12  -1  327.06    8.88   0
   9 -12  -1  371.98   11.51   0
   8 -12  -1  119.73   10.17   0
   7 -12  -1  103.95    9.58   0
  -6  12   1   53.17   14.91   0
   6 -12  -1   45.48    9.42   0
   5 -12  -1   10.71    6.53   0
  -5  12   1    9.13    9.01   0
   4 -12  -1   61.20    7.14   0
   3 -12  -1  111.99    7.00   0
   2 -12  -1  272.37   10.21   0
   1 -12  -1  865.97   12.28   0
  -1  12   1  915.57   12.31   0
   0 -12  -1  120.16    7.33   0
   0  12   1  118.78    7.66   0
   1  12   1   91.40    7.58   0
  -1 -12  -1   87.44    7.47   0
   2  12   1   45.50    7.90   0
  -2 -12  -1   44.40    7.49   0
  -3 -12  -1   17.41    7.83   0
   3  12   1   31.08   11.13   0
  12 -13  -1  134.15    8.91   0
  12 -13  -1  116.71    9.02   0
  11 -13  -1  155.12    8.40   0
  11 -13  -1  149.62   11.56   0
  10 -13  -1   73.82    8.05   0
  10 -13  -1   80.25   11.03   0
   9 -13  -1  159.49    8.51   0
   9 -13  -1  169.92    8.31   0
   8 -13  -1  129.36   10.75   0
   7 -13  -1  351.74    8.73   0
   6 -13  -1   92.74   10.21   0
  -6  13   1   96.20   16.09   0
  -5  13   1   14.07    9.84   0
   5 -13  -1   14.95    7.13   0
   4 -13  -1   35.03    9.71   0
   3 -13  -1  102.55   10.03   0
   2 -13  -1    6.83    9.84   0
  -1  13   1   96.72    7.89   0
   1 -13  -1  109.94   10.65   0
   0  13   1  175.18    8.28   0
   0 -13  -1  168.12   10.97   0
   1  13   1  155.14    8.59   0
  -1 -13  -1  137.17   11.63   0
  -2 -13  -1  211.63   12.21   0
   2  13   1  235.53   12.55   0
  12 -14  -1    7.02    8.75   0
  11 -14  -1   59.92   12.11   0
  11 -14  -1   56.77    8.52   0
  10 -14  -1   72.55    8.43   0
  10 -14  -1   91.85   11.77   0
   9 -14  -1  145.33   11.31   0
   9 -14  -1  141.76    8.45   0
   8 -14  -1   60.75    8.01   0
   7 -14  -1   90.88    7.91   0
   6 -14  -1  349.55    9.17   0
  -6  14   1  401.56   20.17   0
  -5  14   1   95.91   11.72   0
   5 -14  -1   93.54   10.52   0
   4 -14  -1  112.34    8.24   0
   3 -14  -1    7.23   10.53   0
   2 -14  -1    2.96    7.64   0
   1 -14  -1    8.19    7.74   0
   0 -14  -1   43.28    8.47   0
   0  14   1   46.94   11.88   0
  10 -15  -1   12.22    8.95   0
  10 -15  -1   -0.92    8.67   0
   9 -15  -1   -2.30    8.22   0
   9 -15  -1    7.27    8.53   0
   8 -15  -1   71.61    8.69   0
   7 -15  -1   61.43   11.46   0
  -6  15   1  232.16   17.94   0
   6 -15  -1  248.21   11.97   0
   5 -15  -1   79.29    8.76   0
  -5  15   1  106.22   12.61   0
  -4  15   1  106.29   12.79   0
   4 -15  -1   99.08    8.50   0
   3 -15  -1  205.00   11.98   0
   2 -15  -1   43.81    8.41   0
   2 -16   2   99.26    9.02   0
  -3  16  -2  186.14   13.30   0
   3 -16   2  149.87    9.20   0
   4 -16   2   14.42   11.85   0
  -4  16  -2    3.84    8.70   0
   5 -16   2    8.79    8.17   0
  -5  16  -2   10.33   12.62   0
   6 -16   2   -2.23   12.36   0
   6 -16   2    4.12   11.98   0
   7 -16   2    4.64    8.78   0
   7 -16   2   21.83   12.01   0
   8 -16   2   11.18   12.35   0
   8 -16   2    8.11    8.79   0
   0  15  -2   23.92   12.17   0
   0 -15   2   20.86    8.12   0
   1 -15   2   35.91    8.22   0
  -1  15  -2   50.98   12.08   0
   2 -15   2   45.61   11.04   0
  -3  15  -2  150.76   12.23   0
   3 -15   2  133.68   11.15   0
   4 -15   2  201.22   11.52   0
  -4  15  -2  205.07   12.77   0
  -5  15  -2    1.43   11.27   0
   5 -15   2    1.09    7.56   0
   6 -15   2   63.34   11.43   0
  -6  15  -2   48.84   14.93   0
   6 -15   2   58.51   11.06   0
   7 -15   2    1.45   11.33   0
   7 -15   2   16.43    8.05   0
   8 -15   2   -2.63    8.23   0
   8 -15   2   -0.14    8.12   0
   9 -15   2   -9.84   11.72   0
   9 -15   2    2.92   11.62   0
  10 -15   2   50.30   12.45   0
  10 -15   2   64.06   12.47   0
  -2 -14   2  136.59    8.78   0
  -1 -14   2   16.34   10.80   0
   0 -14   2    8.44    7.54   0
   1 -14   2   53.36   10.79   0
  -1  14  -2   55.05    8.03   0
   2 -14   2  133.23    7.90   0
   3 -14   2   43.40    7.35   0
  -3  14  -2   44.89   10.33   0
   4 -14   2  166.92   10.50   0
  -4  14  -2  178.89   11.71   0
  -5  14  -2  175.80   11.86   0
   5 -14   2  157.22    7.93   0
   6 -14   2  376.88   11.84   0
   6 -14   2  342.93   11.52   0
   7 -14   2  204.38   11.36   0
   7 -14   2  209.91   11.52   0
   8 -14   2   13.54   10.74   0
   8 -14   2   13.63    7.67   0
   9 -14   2    2.57   11.05   0
   9 -14   2   25.69   10.81   0
  10 -14   2   23.25    8.10   0
  10 -14   2   11.15   11.70   0
  11 -14   2    5.72    8.45   0
  11 -14   2    7.87    8.42   0
   4  13  -2  166.03    9.60   0
  -4 -13   2  161.96    9.33   0
  -3 -13   2   26.07   10.94   0
   3  13  -2   16.67   11.37   0
   2  13  -2   65.21   10.79   0
  -2 -13   2   74.62   10.52   0
  -1 -13   2  161.38    7.89   0
   0 -13   2   50.41    7.24   0
   1 -13   2   66.85   10.06   0
  -1  13  -2   85.89    7.60   0
   2 -13   2  103.70   10.03   0
   3 -13   2  166.41    7.75   0
  -3  13  -2  212.77   11.12   0
   4 -13   2  217.92   10.41   0
  -4  13  -2  212.92    8.82   0
   5 -13   2  150.30    7.67   0
  -5  13  -2  190.75   11.47   0
   6 -13   2  114.20    7.40   0
   6 -13   2  130.26    7.95   0
   7 -13   2  396.51    8.98   0
   7 -13   2  358.11    8.97   0
   8 -13   2  217.55   10.99   0
   8 -13   2  194.70   11.24   0
   9 -13   2  175.55   11.58   0
   9 -13   2  163.81    8.51   0
  10 -13   2   19.37    7.56   0
  10 -13   2   21.57   10.91   0
  11 -13   2   14.14    8.08   0
  11 -13   2    9.68    8.37   0
  12 -13   2    8.21    8.37   0
  -5 -12   2   -4.81   11.37   0
   5  12  -2   -0.49    8.19   0
  -4 -12   2   82.72    7.80   0
   4  12  -2  105.93   11.05   0
   3  12  -2  247.29   11.15   0
  -3 -12   2  214.92    8.33   0
  -2 -12   2  195.38   10.62   0
   2  12  -2  189.16   11.02   0
  -1 -12   2  424.07   10.88   0
   1  12  -2  410.94   10.90   0
   0 -12   2   68.90    6.80   0
   1 -12   2  233.32    7.70   0
   2 -12   2  210.76    7.56   0
   3 -12   2    5.23    6.34   0
  -3  12  -2    8.05    9.35   0
  -4  12  -2   29.92    9.35   0
   4 -12   2   24.86    9.16   0
   5 -12   2  145.26    9.73   0
  -5  12  -2  157.72   10.99   0
   6 -12   2  123.05    7.21   0
   6 -12   2  123.33    7.46   0
   7 -12   2  185.11    7.75   0
   7 -12   2  190.11    8.02   0
   8 -12   2  231.77    8.10   0
   8 -12   2  262.41   10.62   0
   9 -12   2  132.74   10.53   0
   9 -12   2  129.27    7.69   0
  10 -12   2  258.89   11.56   0
  11 -12   2  104.57   11.10   0
  12 -12   2   56.38    8.66   0
  -6 -11   2    2.94    7.85   0
   6  11  -2   -2.86    8.05   0
   5  11  -2    2.99    7.13   0
  -5 -11   2   27.78   10.26   0
   4  11  -2   29.58    6.88   0
  -4 -11   2   20.01    7.01   0
  -3 -11   2   23.15    6.85   0
   3  11  -2   39.92    6.96   0
   2  11  -2   30.11    6.70   0
  -2 -11   2   47.92    6.61   0
  -1 -11   2  433.05   10.76   0
   1  11  -2  402.74    8.61   0
   0 -11   2  220.33    7.23   0
   1 -11   2  276.66    9.72   0
   2 -11   2  350.77    8.02   0
  -3  11  -2   59.90    9.30   0
   3 -11   2   55.89    6.33   0
   4 -11   2  440.54    8.35   0
  -4  11  -2  534.09   12.77   0
   5 -11   2   84.07    6.55   0
  -5  11  -2  100.48   12.03   0
   6 -11   2    9.71    6.34   0
   6 -11   2    7.19    6.38   0
   7 -11   2   88.15    9.71   0
   7 -11   2   85.42    7.08   0
   8 -11   2  586.84    9.69   0
   9 -11   2  108.90    7.36   0
  10 -11   2  105.64    7.60   0
  11 -11   2  174.26    8.36   0
  12 -11   2  147.13    8.87   0
  13 -11   2  135.74   12.73   0
  -7 -10   2  192.72    8.84   0
   7  10  -2  202.75   12.15   0
   6  10  -2  292.39   11.45   0
  -6 -10   2  286.37   11.34   0
   5  10  -2   23.91    9.90   0
  -5 -10   2   22.01    9.77   0
   4  10  -2   28.01    9.47   0
  -4 -10   2   30.69    9.31   0
  -3 -10   2    6.39    8.91   0
   3  10  -2    9.13    6.49   0
   2  10  -2   33.22    6.38   0
  -2 -10   2   33.47    6.22   0
  -1 -10   2    4.86    5.93   0
   1  10  -2    0.68    8.77   0
   0 -10   2  138.96    6.73   0
   1 -10   2  470.00    8.40   0
   2 -10   2 1327.27   12.05   0
  -3  10  -2  283.04   10.53   0
   3 -10   2  239.62    9.76   0
  -4  10  -2  455.73   12.30   0
   4 -10   2  395.88   10.43   0
   5 -10   2  385.98    8.31   0
  -5  10  -2  417.81   13.10   0
   5 -10   2  401.36   10.52   0
   6 -10   2  114.21    9.35   0
   6 -10   2  118.34    9.25   0
   7 -10   2  219.44    7.52   0
   8 -10   2  127.21    9.33   0
   9 -10   2   73.09    7.27   0
  10 -10   2   58.11    7.49   0
  11 -10   2  143.18    7.99   0
  12 -10   2   56.55   10.79   0
  13 -10   2  171.80    9.29   0
  -8  -9   2   73.33   11.43   0
   8   9  -2   65.64   11.38   0
  -7  -9   2   29.76    7.37   0
   7   9  -2   25.76   10.24   0
  -6  -9   2  234.58   10.50   0
   6   9  -2  218.56   10.61   0
   5   9  -2  109.65    7.20   0
  -5  -9   2  129.48    9.59   0
  -4  -9   2  303.89   10.02   0
   4   9  -2  305.09   10.02   0
   3   9  -2  281.17    9.72   0
  -3  -9   2  255.65    7.32   0
  -2  -9   2    2.42    5.74   0
   2   9  -2    0.51    5.87   0
  -1  -9   2   -2.21    8.23   0
   1   9  -2   10.09    6.07   0
   0  -9   2  233.25    9.33   0
   0   9  -2  240.22    9.40   0
   1  -9   2   86.64    6.57   0
   2  -9   2  190.22    9.21   0
   3  -9   2  730.55   11.45   0
  -3   9  -2  729.26   11.45   0
   4  -9   2  475.70    8.81   0
  -4   9  -2  599.27   13.36   0
   5  -9   2  497.42   11.29   0
   5  -9   2  463.58    9.35   0
   6  -9   2    4.83    8.56   0
   7  -9   2   51.20    6.55   0
   8  -9   2   14.67    6.32   0
   9  -9   2   24.92    6.41   0
   9  -9   2   33.61   14.06   0
  10  -9   2   39.87   12.86   0
  10  -9   2   42.74    6.69   0
  11  -9   2  214.80   15.33   0
  11  -9   2  180.41    7.78   0
  12  -9   2  118.71   12.51   0
  12  -9   2  111.62   11.05   0
  13  -9   2  108.86   13.76   0
  13  -9   2   88.72    8.86   0
   9   8  -2   21.27   11.29   0
  -9  -8   2   13.24   11.44   0
   8   8  -2   63.24    7.58   0
  -8  -8   2   72.42    7.61   0
  -7  -8   2   95.58   10.03   0
   7   8  -2   81.94    7.26   0
  -6  -8   2   84.97    6.72   0
   6   8  -2   87.39    6.85   0
   5   8  -2  205.49    7.39   0
  -5  -8   2  213.15    9.34   0
  -4  -8   2  124.82    8.93   0
   4   8  -2  121.52    9.10   0
  -3  -8   2 1678.40   14.46   0
   3   8  -2 1674.86   14.66   0
   2   8  -2  496.53    8.74   0
  -2  -8   2  508.85    8.46   0
   1   8  -2  495.77   10.43   0
  -1  -8   2  451.08    8.32   0
   0  -8   2   79.41    8.29   0
   0   8  -2   68.33    6.28   0
   1  -8   2   25.12    8.08   0
   2  -8   2   37.38    8.50   0
  -3   8  -2  187.36   10.24   0
   3  -8   2  165.46    6.95   0
   4  -8   2  202.04    6.99   0
  -4   8  -2  229.64   11.01   0
   5  -8   2  801.53    9.89   0
   6  -8   2  751.02    9.75   0
   7  -8   2  457.29    8.32   0
   7  -8   2  533.61   15.06   0
   8  -8   2  385.82   15.01   0
   8  -8   2  334.03    7.65   0
   9  -8   2   81.28   10.36   0
   9  -8   2   83.37    8.95   0
  10  -8   2  165.25    9.60   0
  10  -8   2  174.52   11.61   0
  11  -8   2   12.12   10.54   0
  11  -8   2    2.73    6.62   0
  12  -8   2   16.17   11.48   0
  12  -8   2   12.62    7.15   0
  13  -8   2   42.09   11.57   0
  13  -8   2   42.68   12.29   0
 -10  -7   2   20.07   11.59   0
  10   7  -2   15.36    8.19   0
   9   7  -2  159.84    8.20   0
  -9  -7   2  161.45    8.28   0
  -8  -7   2   60.39    7.20   0
   8   7  -2   61.87   10.02   0
   7   7  -2   31.04    6.61   0
  -7  -7   2   17.11    6.69   0
   6   7  -2    4.51    8.64   0
  -6  -7   2   10.63    6.07   0
   5   7  -2  367.83    9.98   0
  -5  -7   2  367.98   10.01   0
  -4  -7   2  122.11    6.70   0
   4   7  -2  121.26    6.70   0
   3   7  -2  523.96   10.63   0
  -3  -7   2  478.48    8.39   0
   2   7  -2  484.92   10.39   0
  -2  -7   2  475.07   10.29   0
  -1  -7   2  453.05   10.03   0
   1   7  -2  472.17   10.18   0
   0  -7   2 1909.52   15.64   0
   0   7  -2 1878.67   14.63   0
   1  -7   2  100.17    8.18   0
   2  -7   2  148.62    8.55   0
  -3   7  -2  300.25   10.99   0
   3  -7   2  257.58    7.50   0
   4  -7   2  277.47    7.69   0
  -4   7  -2  311.91   11.64   0
   5  -7   2   13.78    8.96   0
   5  -7   2   21.82    5.81   0
   6  -7   2 1273.20   20.44   0
   6  -7   2 1150.13   10.89   0
   7  -7   2 1107.12   17.95   0
   7  -7   2  978.20   10.27   0
   8  -7   2 1138.81   10.85   0
   8  -7   2 1198.89   17.65   0
   9  -7   2  535.46   13.60   0
   9  -7   2  494.48    8.35   0
  10  -7   2   89.51    6.85   0
  10  -7   2   72.06    7.69   0
  11  -7   2   55.21   10.91   0
  11  -7   2   41.61    6.86   0
  12  -7   2    0.50    9.93   0
  13  -7   2   10.10    7.98   0
  11   6  -2  226.47   12.93   0
 -11  -6   2  210.08    9.73   0
  10   6  -2  101.41    8.20   0
 -10  -6   2  106.52    8.24   0
   9   6  -2   71.11    7.41   0
  -9  -6   2   73.07    7.35   0
  -8  -6   2   73.18    6.90   0
   8   6  -2   71.64    6.83   0
  -7  -6   2   56.87    8.99   0
   7   6  -2   46.62    6.61   0
   6   6  -2  355.87    8.01   0
  -6  -6   2  367.39   10.02   0
  -5  -6   2    2.28    8.10   0
   5   6  -2    3.87    6.02   0
  -4  -6   2  108.55    8.41   0
   4   6  -2  102.79    6.43   0
   3   6  -2 1095.09   12.67   0
  -3  -6   2 1083.74   12.55   0
   2   6  -2  525.01    8.99   0
  -2  -6   2  561.58   10.75   0
   1   6  -2   73.06    8.15   0
  -1  -6   2   67.68    5.97   0
   0  -6   2  851.50   12.21   0
   0   6  -2  919.38   12.63   0
   1  -6   2 1726.37   14.75   0
   2  -6   2 1153.53   13.06   0
   3  -6   2 1014.30   11.47   0
  -3   6  -2 1166.16   17.09   0
   4  -6   2  113.18    6.66   0
   4  -6   2  124.30   10.14   0
   5  -6   2  119.36   10.17   0
   5  -6   2  132.20    8.90   0
   6  -6   2  122.73   10.67   0
   6  -6   2  122.40    8.73   0
   7  -6   2   81.37   10.12   0
   7  -6   2   75.22    6.31   0
   8  -6   2   19.42    6.00   0
   9  -6   2  524.37    8.55   0
 -10   6  -2  286.66    7.81   0
  10  -6   2  283.06    7.86   0
  11  -6   2  501.33   11.40   0
  12  -6   2   83.92    7.78   0
  13  -6   2   16.00   11.47   0
 -11  -5   2    9.04    8.08   0
  11   5  -2    9.69   11.21   0
  10   5  -2  141.94    7.63   0
 -10  -5   2  143.73   10.64   0
   9   5  -2  110.45    7.28   0
  -9  -5   2  123.06    9.88   0
   8   5  -2  282.62    7.85   0
  -8  -5   2  306.45   10.22   0
   7   5  -2  165.20    9.13   0
  -7  -5   2  157.71    6.83   0
  -6  -5   2  506.78   10.49   0
   6   5  -2  499.48   10.53   0
   5   5  -2  502.38   10.48   0
  -5  -5   2  490.23   10.51   0
  -4  -5   2  202.99    8.68   0
   4   5  -2  199.43    8.85   0
  -3  -5   2   85.68    6.03   0
   3   5  -2   95.25    8.19   0
   2   5  -2  589.51   11.58   0
  -2  -5   2  559.14    9.71   0
   1   5  -2   46.75    8.21   0
  -1  -5   2   42.56    8.29   0
   0  -5   2 1342.40   15.61   0
   1  -5   2 1200.19   13.78   0
  -3   5  -2 1578.27   18.56   0
   3  -5   2 1612.38   14.29   0
   3  -5   2 1833.23   21.59   0
   4  -5   2  747.62   15.08   0
   4  -5   2  698.53   11.59   0
   5  -5   2 2234.10   22.08   0
   5  -5   2 1989.37   14.14   0
  -6   5  -2  136.90    8.58   0
   6  -5   2  121.46    8.52   0
  -7   5  -2   69.49    8.79   0
   7  -5   2   60.12    6.40   0
  -8   5  -2   36.92    6.04   0
   8  -5   2   28.55    6.12   0
  -9   5  -2  334.79    7.63   0
   9  -5   2  354.61   10.11   0
 -10   5  -2   47.79    6.55   0
  10  -5   2   58.03    6.58   0
 -11   5  -2  212.62   10.79   0
  11  -5   2  196.85   10.86   0
  12  -5   2  409.04    9.32   0
 -12   5  -2  422.35    9.14   0
  13  -5   2  134.37    8.88   0
 -13   5  -2  154.51    8.83   0
 -12  -4   2   -1.31   11.88   0
  12   4  -2    6.21   11.63   0
  11   4  -2   20.71   10.53   0
 -11  -4   2   18.08   10.71   0
  10   4  -2   25.58    7.06   0
 -10  -4   2   43.38    6.93   0
  -9  -4   2   15.36    6.70   0
   9   4  -2   21.47    9.28   0
   8   4  -2  443.83    8.59   0
  -8  -4   2  482.43   10.67   0
   7   4  -2 1461.08   13.74   0
  -7  -4   2 1429.34   13.72   0
   6   4  -2  726.00    9.61   0
  -6  -4   2  729.56    9.65   0
  -5  -4   2 1453.90   13.84   0
   5   4  -2 1307.04   12.15   0
  -4  -4   2  156.20    8.46   0
   4   4  -2  140.60    6.60   0
  -3  -4   2  587.16   10.16   0
   3   4  -2  620.53   10.32   0
   2   4  -2  669.14   12.73   0
  -2  -4   2  638.11   12.48   0
  -1  -4   2  141.41    7.18   0
   1   4  -2  147.69    7.27   0
   0   4  -2    5.78    6.65   0
   0  -4   2   10.06    8.15   0
   2  -4   2 2607.96   24.96   0
   2  -4   2 2832.81   21.88   0
  -3   4  -2  924.45   11.85   0
   3  -4   2 1076.23   17.27   0
   3  -4   2  949.52   11.85   0
   4  -4   2  479.32   13.46   0
   4  -4   2  431.33    8.60   0
  -4   4  -2  436.86   10.56   0
  -5   4  -2 1213.27   12.90   0
   5  -4   2 1137.91   11.31   0
   6  -4   2 1608.82   12.89   0
  -6   4  -2 1689.09   14.31   0
  -7   4  -2  261.07    7.13   0
   7  -4   2  268.89    7.29   0
   8  -4   2  131.40    8.89   0
  -8   4  -2  122.74    6.54   0
  -9   4  -2   57.16    8.70   0
   9  -4   2   55.37    6.46   0
 -10   4  -2   51.13    6.54   0
  10  -4   2   48.45    9.08   0
  11  -4   2   -0.29    9.85   0
 -11   4  -2    7.16    6.96   0
  12  -4   2  126.31   11.09   0
 -12   4  -2  134.51    7.93   0
 -13   4  -2   74.67    8.86   0
  13  -4   2   81.43    8.63   0
  12   3  -2   19.09    8.05   0
 -12  -3   2   24.81    8.10   0
 -11  -3   2   91.41    7.67   0
  11   3  -2   99.19   10.40   0
  10   3  -2   -3.30    9.34   0
 -10  -3   2    5.69    9.48   0
   9   3  -2    5.50    8.70   0
  -9  -3   2    6.59    8.85   0
   8   3  -2   66.25    6.19   0
  -8  -3   2   59.09    6.16   0
  -7  -3   2   74.06    6.64   0
   7   3  -2   69.42    6.19   0
   6   3  -2   55.54    6.41   0
  -6  -3   2   62.67    7.94   0
   5   3  -2  470.32    8.73   0
  -5  -3   2  499.02   10.38   0
   4   3  -2 1047.09   13.46   0
  -4  -3   2  933.59   11.81   0
  -3  -3   2  191.48    9.23   0
   3   3  -2  202.29    9.29   0
   2   3  -2  628.32   12.51   0
  -2  -3   2  705.03   14.12   0
  -1  -3   2  364.04   12.84   0
   1   3  -2  358.23   13.06   0
   0   3  -2 6167.41   33.96   0
   0  -3   2 5310.12   37.33   0
   1  -3   2 1529.10   19.09   0
   2  -3   2  402.43   10.02   0
   2  -3   2  447.17   13.88   0
  -2   3  -2  403.71   12.29   0
   3  -3   2  337.10    8.50   0
  -3   3  -2  371.39   10.66   0
   4  -3   2 1258.26   12.06   0
  -4   3  -2 1276.20   12.05   0
   5  -3   2  273.15    7.45   0
  -5   3  -2  279.70    7.35   0
  -6   3  -2  429.24    7.93   0
   6  -3   2  435.74    7.90   0
  -7   3  -2  516.90    8.15   0
   7  -3   2  521.62    8.23   0
   8  -3   2  339.26    9.62   0
  -8   3  -2  329.88    7.20   0
  -9   3  -2  264.74    9.28   0
   9  -3   2  260.21    9.41   0
 -10   3  -2    1.94    9.29   0
  10  -3   2    2.46    9.06   0
  11  -3   2    9.54    6.93   0
 -11   3  -2   17.25    9.76   0
 -12   3  -2   42.26    7.89   0
  12  -3   2   53.62   10.66   0
  13  -3   2   36.33   11.52   0
 -13   3  -2   24.65    8.30   0
  13   2  -2  117.25   12.17   0
 -13  -2   2  127.74   12.34   0
 -12  -2   2  124.31   11.32   0
  12   2  -2  125.33    8.06   0
 -11  -2   2  336.57   11.15   0
  11   2  -2  344.60   10.95   0
  10   2  -2  281.68    7.76   0
 -10  -2   2  292.78   10.32   0
   9   2  -2   11.80    6.34   0
  -9  -2   2   22.70    8.62   0
   8   2  -2   55.56    8.70   0
  -8  -2   2   55.73    6.25   0
  -7  -2   2   92.57    8.50   0
   7   2  -2   89.72    6.31   0
   6   2  -2   21.41    7.86   0
  -6  -2   2   39.65    7.99   0
   5   2  -2   89.83    6.14   0
  -5  -2   2   86.54    5.97   0
  -4  -2   2 1427.19   15.07   0
   4   2  -2 1478.11   15.13   0
   3   2  -2 1444.71   18.07   0
  -3  -2   2 1417.30   18.04   0
   2   2  -2 5270.74   41.70   0
  -2  -2   2 5094.90   41.14   0
  -1  -2   2  400.12   19.59   0
   1   2  -2  510.81   12.12   0
   1   2  -2  406.99   18.94   0
   0  -2   2 2543.92   24.95   0
   0   2  -2 2671.73   26.16   0
  -1   2  -2  219.87    9.93   0
  -1   2  -2  226.15   10.85   0
   1  -2   2  223.96   11.06   0
   1  -2   2  214.60    9.61   0
  -2   2  -2 2178.63   19.82   0
   2  -2   2 2046.30   17.89   0
   3  -2   2 1462.17   13.64   0
  -3   2  -2 1412.34   13.43   0
   4  -2   2   38.14    5.93   0
  -4   2  -2   42.08    5.88   0
  -5   2  -2   90.66    8.20   0
   5  -2   2   87.31    6.14   0
  -6   2  -2  702.86    8.74   0
   6  -2   2  690.89    8.95   0
  -7   2  -2  702.83    8.85   0
   7  -2   2  671.85    8.90   0
   8  -2   2  178.76    8.83   0
  -8   2  -2  179.27    8.90   0
  -9   2  -2  261.97    9.28   0
   9  -2   2  263.79    9.84   0
 -10   2  -2  217.33    7.54   0
  10  -2   2  203.31    7.58   0
 -11   2  -2  292.58   10.83   0
  11  -2   2  259.22    8.29   0
  12  -2   2   29.72    7.83   0
 -12   2  -2   37.64    7.74   0
 -13   2  -2   45.34   11.91   0
  13  -2   2   40.08   12.01   0
  13   1  -2   86.17   11.89   0
 -13  -1   2   91.53    8.67   0
  12   1  -2  110.67    7.98   0
 -12  -1   2   94.97    8.00   0
 -11  -1   2   36.78    9.95   0
  11   1  -2   45.71    6.96   0
  10   1  -2  337.78   10.39   0
 -10  -1   2  328.73    8.06   0
  -9  -1   2  335.02   10.05   0
   9   1  -2  337.34    9.98   0
   8   1  -2 1028.33   10.67   0
  -8  -1   2 1004.49   10.56   0
   7   1  -2  174.63    9.11   0
  -7  -1   2  173.16    6.90   0
   6   1  -2  178.75    8.74   0
  -6  -1   2  169.28    8.68   0
   5   1  -2   35.18    5.60   0
  -5  -1   2   41.02    8.49   0
  -4  -1   2  558.76   12.09   0
   4   1  -2  569.28   11.87   0
   3   1  -2  130.19    9.94   0
  -3  -1   2  124.36    8.13   0
  -2  -1   2  617.76   21.85   0
   2   1  -2  558.57   19.18   0
   1   1  -2 3822.00   32.01   0
  -1  -1   2 4027.14   31.95   0
   0  -1   2 1632.78   22.30   0
   0   1  -2 1645.10   22.15   0
   0   1  -2 1483.33   23.77   0
   1  -1   2  427.49   11.01   0
  -1   1  -2  456.49   11.33   0
   2  -1   2  312.53   11.09   0
  -2   1  -2  301.14    8.81   0
   3  -1   2  169.36    8.88   0
  -3   1  -2  172.60    8.94   0
   4  -1   2  559.77   10.38   0
  -4   1  -2  537.55    8.59   0
   5  -1   2  157.61    8.70   0
  -5   1  -2  142.37    8.47   0
  -6   1  -2  111.36    6.14   0
   6  -1   2  111.77    6.16   0
   7  -1   2 1310.31   10.94   0
  -7   1  -2 1308.46   10.77   0
   8  -1   2  406.98    9.95   0
  -8   1  -2  418.91    9.75   0
   9  -1   2  241.04    7.44   0
  -9   1  -2  249.65    7.18   0
 -10   1  -2  225.58    9.95   0
  10  -1   2  240.97    9.92   0
 -11   1  -2  104.55   10.59   0
  11  -1   2   91.03    7.67   0
  12  -1   2  141.90    8.57   0
 -12   1  -2  164.27    8.60   0
  14   0  -2   11.43    8.57   0
 -14   0   2    9.33    8.58   0
 -13   0   2   18.11   11.13   0
  13   0  -2   19.51    7.86   0
  12   0  -2   74.55    7.51   0
 -12   0   2   85.91    7.68   0
  11   0  -2  150.59    9.98   0
 -11   0   2  139.29    7.33   0
 -10   0   2  306.07    7.65   0
  10   0  -2  322.48   10.34   0
  -9   0   2  399.35    8.12   0
   9   0  -2  426.88   10.16   0
   8   0  -2  465.06    8.41   0
  -8   0   2  477.85    8.43   0
   7   0  -2 1880.81   15.17   0
  -7   0   2 1891.11   15.27   0
   6   0  -2  734.11   11.34   0
  -6   0   2  749.26   11.45   0
  -5   0   2 1177.94   14.66   0
   5   0  -2 1142.37   12.91   0
   4   0  -2   84.36    6.68   0
  -4   0   2   83.27    6.89   0
  -3   0   2 2781.61   27.73   0
   3   0  -2 2880.03   27.49   0
   2   0  -2 1382.20   21.19   0
  -2   0   2 1189.44   18.23   0
   1   0  -2   93.51    8.45   0
   1   0  -2   83.84   10.14   0
  -1   0   2   94.94    8.59   0
   0   0  -2 3896.68   30.01   0
   0   0   2 3734.88   29.21   0
   1   0   2 1343.39   15.61   0
  -1   0  -2 1364.14   15.76   0
  -2   0  -2 3416.00   20.42   0
   2   0   2 3475.70   20.48   0
  -3   0  -2 1783.08   13.86   0
   3   0   2 1489.31   12.80   0
  -4   0  -2  893.29   10.08   0
   4   0   2 1017.68   12.03   0
  -5   0  -2   32.42    8.11   0
   5   0   2   16.72    5.44   0
   6   0   2  160.03    8.57   0
  -6   0  -2  174.15    8.67   0
   7   0   2    0.21    8.08   0
  -7   0  -2    1.35    5.59   0
  -8   0  -2  103.40    6.42   0
   8   0   2   92.48    8.87   0
   9   0   2   62.17    6.59   0
  -9   0  -2   73.33    6.87   0
  10   0   2  492.18    9.12   0
 -10   0  -2  526.45   11.49   0
 -11   0  -2  100.64   10.76   0
  11   0   2   81.74   10.59   0
 -12   0  -2   81.40   11.56   0
  12   0   2   62.45    8.45   0
  14  -1  -2    2.96    8.60   0
 -14   1   2    1.08    8.57   0
 -13   1   2  161.71   11.24   0
  13  -1  -2  149.23    8.28   0
 -12   1   2  115.75   10.30   0
  12  -1  -2  107.89    7.55   0
  11  -1  -2    9.45    9.39   0
 -11   1   2   24.15    9.27   0
  10  -1  -2   60.83    6.58   0
 -10   1   2   66.88    8.85   0
  -9   1   2  462.66    8.61   0
   9  -1  -2  558.18    9.53   0
  -8   1   2  175.49    7.11   0
   8  -1  -2  162.43    7.01   0
  -7   1   2  255.34    9.44   0
   7  -1  -2  228.30    7.27   0
   6  -1  -2  503.17    8.86   0
  -6   1   2  552.53   10.81   0
  -5   1   2 1296.41   14.02   0
   5  -1  -2 1369.62   15.55   0
   4  -1  -2 4170.00   25.88   0
   3  -1  -2  157.19    9.47   0
  -2   1   2 1668.71   24.79   0
   2  -1  -2 1588.77   24.43   0
  -2   1   2 1459.86   19.09   0
   2  -1  -2 1412.16   18.85   0
   1  -1  -2    0.91    9.19   0
  -1   1   2    2.16    9.14   0
   0  -1  -2   64.68    7.74   0
   0   1   2   61.97    7.81   0
  -1  -1  -2  988.17   14.33   0
   1   1   2  971.69   14.12   0
   2   1   2 2780.28   18.41   0
  -2  -1  -2 2462.15   16.62   0
  -3  -1  -2 1637.17   12.79   0
   3   1   2 1802.31   14.35   0
  -4  -1  -2 2849.84   16.56   0
   4   1   2 2836.55   16.62   0
   5   1   2  673.09    8.82   0
  -5  -1  -2  663.90    8.56   0
   6   1   2  306.79    9.09   0
  -6  -1  -2  307.44    9.08   0
  -7  -1  -2   66.30    5.89   0
   7   1   2   70.64    6.31   0
   8   1   2   11.20    8.50   0
  -8  -1  -2   19.91    8.57   0
   9   1   2   94.40    9.50   0
  -9  -1  -2   84.58    9.31   0
  10   1   2   28.96    9.74   0
 -10  -1  -2    7.02    6.97   0
 -11  -1  -2   75.03    8.11   0
  11   1   2   73.89    8.03   0
 -12  -1  -2  157.15    9.24   0
  12   1   2  138.77    9.26   0
  14  -2  -2   36.35    8.38   0
  13  -2  -2   57.54   10.76   0
 -13   2   2   56.90   10.71   0
 -12   2   2  227.30    7.85   0
  12  -2  -2  211.48    8.31   0
 -11   2   2   47.54    6.72   0
  11  -2  -2   45.90    6.78   0
  10  -2  -2  302.03    9.98   0
 -10   2   2  298.43    7.74   0
   9  -2  -2   49.27    6.51   0
  -9   2   2   40.95    6.41   0
   8  -2  -2  319.61    9.86   0
  -8   2   2  311.21    9.66   0
   7  -2  -2  687.45   11.59   0
  -7   2   2  670.96   11.41   0
   6  -2  -2 1224.95   14.24   0
   5  -2  -2 1541.43   14.45   0
   4  -2  -2 5196.97   38.60   0
  -3   2   2  598.40   16.85   0
   3  -2  -2  540.72   11.54   0
   3  -2  -2  589.58   17.36   0
   2  -2  -2 2032.93   18.85   0
  -2   2   2 2143.91   27.25   0
  -2   2   2 1967.72   18.50   0
   1  -2  -2 2212.70   20.02   0
  -1   2   2 2077.26   18.16   0
   0   2   2  137.49    7.49   0
   0  -2  -2  131.28    7.60   0
  -1  -2  -2    4.38    5.74   0
   1   2   2    5.97    5.74   0
  -2  -2  -2  897.71   10.19   0
   2   2   2  942.81   11.71   0
  -3  -2  -2  213.32    6.99   0
   3   2   2  222.59    6.78   0
  -4  -2  -2  198.34    6.42   0
   4   2   2  224.45    8.71   0
   5   2   2 1149.02   10.34   0
  -5  -2  -2 1183.11   10.30   0
  -6  -2  -2 1066.54    9.92   0
   6   2   2  988.64    9.85   0
  -7  -2  -2  867.56    9.24   0
   7   2   2  838.27    9.20   0
   8   2   2   89.62    9.10   0
  -8  -2  -2   84.01    8.96   0
  -9  -2  -2   16.45    6.60   0
   9   2   2   12.24    6.70   0
  10   2   2   26.76    7.49   0
 -10  -2  -2   37.14   10.07   0
 -11  -2  -2    7.95    7.93   0
  11   2   2    7.90    8.14   0
  14  -3  -2   93.01   11.76   0
  13  -3  -2  142.06    8.38   0
  12  -3  -2  547.51    9.69   0
  11  -3  -2  126.59    7.20   0
  10  -3  -2  101.00    6.90   0
   9  -3  -2   97.53    8.64   0
   8  -3  -2   19.88    8.44   0
   7  -3  -2  181.26    7.25   0
   6  -3  -2  398.80    8.28   0
   5  -3  -2  680.07   16.97   0
   5  -3  -2  607.26   10.00   0
   4  -3  -2 1584.11   27.35   0
   3  -3  -2   36.42    6.65   0
  -3   3   2   35.06    9.38   0
  -2   3   2    9.76    8.67   0
   2  -3  -2   11.75    8.93   0
   1  -3  -2 3310.05   19.88   0
  -1   3   2 3371.69   19.93   0
   0   3   2 1917.59   14.80   0
   0  -3  -2 2260.10   17.05   0
  -1  -3  -2 1197.02   12.64   0
   1   3   2 1029.02   10.72   0
  -2  -3  -2   26.20    5.68   0
   2   3   2   30.63    5.82   0
  -3  -3  -2  748.60   10.58   0
   3   3   2  721.13    8.85   0
  -4  -3  -2    3.82    5.46   0
   4   3   2   14.53    5.47   0
  -5  -3  -2   88.54    8.37   0
   5   3   2   88.53    8.57   0
  -6  -3  -2   43.07    5.99   0
   6   3   2   41.75    6.04   0
   7   3   2  332.10    7.48   0
  -7  -3  -2  322.18    7.37   0
   8   3   2  486.51    8.66   0
  -8  -3  -2  482.35    8.24   0
   9   3   2  113.41    7.40   0
  -9  -3  -2  138.04   10.10   0
 -10  -3  -2  127.21    8.23   0
  10   3   2  150.01   11.13   0
 -11  -3  -2   -7.32   11.99   0
  11   3   2   10.59   11.92   0
  15  -4  -2   -1.26    8.84   0
  14  -4  -2   12.59    7.96   0
  13  -4  -2   56.58   10.66   0
  12  -4  -2  355.04   11.42   0
  11  -4  -2  465.54    8.66   0
  10  -4  -2  381.61    8.10   0
   9  -4  -2  663.21    9.53   0
   8  -4  -2  110.40    8.69   0
   7  -4  -2  569.10    9.06   0
   6  -4  -2  688.31   17.52   0
   6  -4  -2  659.48    9.56   0
   5  -4  -2   12.82   12.94   0
  -4   4   2   34.64   11.05   0
   4  -4  -2   34.90    6.26   0
   3  -4  -2 2595.12   18.05   0
  -2   4   2  714.57    9.98   0
   2  -4  -2  699.27   10.10   0
   1  -4  -2 2001.67   14.60   0
  -1   4   2 1821.24   13.85   0
   0  -4  -2 1112.66   11.05   0
   0   4   2 1151.28   11.08   0
  -1  -4  -2  941.97   10.08   0
   1   4   2  931.51   10.03   0
   2   4   2 1869.42   12.66   0
  -2  -4  -2 1725.01   12.26   0
  -3  -4  -2  109.57    7.99   0
   3   4   2   93.84    5.93   0
  -4  -4  -2  357.71    7.24   0
   4   4   2  380.64    9.21   0
  -5  -4  -2   50.20    5.72   0
   5   4   2   55.32    8.19   0
  -6  -4  -2  141.24    8.83   0
   6   4   2  128.32    6.49   0
  -7  -4  -2   44.54    9.00   0
   7   4   2   53.61    9.06   0
  -8  -4  -2  195.22   10.22   0
   8   4   2  170.88    7.73   0
  -9  -4  -2   47.01   10.39   0
   9   4   2   50.35    7.37   0
 -10  -4  -2  186.88    8.73   0
  10   4   2  162.09    8.66   0
  15  -5  -2   18.91    8.95   0
  14  -5  -2    7.31    7.71   0
  13  -5  -2   28.82    7.44   0
  12  -5  -2   12.89    6.75   0
  11  -5  -2  144.21    7.30   0
  10  -5  -2  153.21    7.03   0
   9  -5  -2  896.21   10.32   0
   8  -5  -2  704.77   16.02   0
   8  -5  -2  688.80   11.09   0
   7  -5  -2  153.35    8.89   0
   7  -5  -2  154.17   13.64   0
   5  -5  -2   51.49    8.41   0
   4  -5  -2   38.54    6.15   0
  -4   5   2   41.15   10.90   0
  -3   5   2    5.70    5.52   0
   3  -5  -2   -1.22    5.85   0
   2  -5  -2  505.12   10.09   0
  -2   5   2  447.34    8.10   0
   1  -5  -2  970.45   10.48   0
  -1   5   2  999.55   10.49   0
   0   5   2 1278.29   12.57   0
   0  -5  -2 1166.55   10.86   0
   1   5   2  505.41    8.06   0
  -1  -5  -2  514.05    9.71   0
  -2  -5  -2  116.24    6.10   0
   2   5   2  134.49    8.18   0
  -3  -5  -2   45.43    5.93   0
   3   5   2   48.83    5.67   0
   4   5   2  133.46    8.80   0
  -4  -5  -2  147.85    8.28   0
  -5  -5  -2  294.17    9.12   0
   5   5   2  239.28    6.94   0
   6   5   2   32.57    8.49   0
  -6  -5  -2   27.17    6.33   0
  -7  -5  -2   32.40    9.25   0
   7   5   2   27.37    6.58   0
  -8  -5  -2  175.25   10.59   0
   8   5   2  163.50    7.83   0
   9   5   2   31.22   11.04   0
  -9  -5  -2   46.18   10.97   0
  15  -6  -2   54.10    8.91   0
  14  -6  -2  142.13    8.70   0
  13  -6  -2   10.16    6.97   0
  12  -6  -2   16.50    6.70   0
  11  -6  -2   58.68    9.20   0
  11  -6  -2   66.63   10.22   0
  10  -6  -2    8.42    9.35   0
  10  -6  -2    4.17    6.15   0
   9  -6  -2   43.53   12.17   0
   9  -6  -2   48.27    8.81   0
   8  -6  -2  517.63    8.88   0
   7  -6  -2 1024.63   10.75   0
   6  -6  -2 2316.40   14.51   0
   5  -6  -2  264.01    9.30   0
   4  -6  -2   52.58    6.03   0
   3  -6  -2   17.90    5.79   0
  -3   6   2   25.35    7.96   0
   2  -6  -2   81.01    6.01   0
  -2   6   2   79.86    5.88   0
   1  -6  -2  425.94    9.56   0
  -1   6   2  437.05    9.47   0
   0  -6  -2  154.23    8.16   0
   0   6   2  143.62    6.19   0
  -1  -6  -2  973.48   11.01   0
   1   6   2  922.24    9.40   0
   2   6   2  463.95    7.79   0
  -2  -6  -2  498.36    9.64   0
  -3  -6  -2  473.11    9.60   0
   3   6   2  473.21    9.78   0
  -4  -6  -2  171.61    6.68   0
   4   6   2  167.73    6.49   0
   5   6   2  546.34   10.40   0
  -5  -6  -2  512.01    8.27   0
   6   6   2  249.83    7.91   0
  -6  -6  -2  276.40   10.08   0
   7   6   2   45.37   10.07   0
  -7  -6  -2   42.97    7.03   0
  -8  -6  -2    2.58    7.50   0
   8   6   2   12.86   10.59   0
   9   6   2   44.60    8.37   0
  -9  -6  -2   58.42    8.33   0
  15  -7  -2   38.59   12.80   0
  15  -7  -2   42.56   12.14   0
  14  -7  -2  272.49   12.15   0
  14  -7  -2  256.96   14.03   0
  13  -7  -2  227.65   11.33   0
  13  -7  -2  208.29   12.93   0
  12  -7  -2  296.76    8.40   0
  12  -7  -2  306.43   15.73   0
  11  -7  -2  153.60   16.06   0
  11  -7  -2  149.54   10.33   0
  10  -7  -2   37.39    6.45   0
   9  -7  -2    7.66    6.25   0
   8  -7  -2  186.26    9.42   0
   7  -7  -2   75.84    6.45   0
   6  -7  -2  954.55   11.87   0
  -5   7   2 1418.22   33.77   0
   5  -7  -2 1242.88   11.54   0
   4  -7  -2  391.14    7.68   0
  -3   7   2 1522.62   11.57   0
   3  -7  -2 1464.09   11.54   0
  -2   7   2   88.97    5.94   0
   2  -7  -2   88.48    5.81   0
   1  -7  -2  244.07    8.70   0
  -1   7   2  246.61    6.73   0
   0   7   2    1.55    5.47   0
   0  -7  -2    7.16    5.44   0
  -1  -7  -2  288.89    8.92   0
   1   7   2  312.77    9.14   0
   2   7   2   12.01    5.86   0
  -2  -7  -2   25.54    7.99   0
  -3  -7  -2  647.84    8.52   0
   3   7   2  710.76   10.48   0
  -4  -7  -2  414.99    9.87   0
   4   7   2  388.98    7.63   0
   5   7   2  510.79    8.69   0
  -5  -7  -2  488.07    8.57   0
  -6  -7  -2  186.56    7.55   0
   6   7   2  179.75    7.57   0
   7   7   2   11.04    7.51   0
  -7  -7  -2   19.04   10.42   0
  -8  -7  -2   90.97   11.69   0
   8   7   2   99.85   11.98   0
  15  -8  -2   47.19   19.57   0
  15  -8  -2   48.74   19.27   0
  15  -8  -2   56.51    8.70   0
  14  -8  -2  101.46    8.49   0
  13  -8  -2  103.99    7.93   0
  12  -8  -2   87.26   10.29   0
  11  -8  -2  761.11   10.33   0
  10  -8  -2  193.14    9.68   0
   9  -8  -2   70.14    8.92   0
   8  -8  -2   41.54    6.37   0
   8  -8  -2   55.98    6.37   0
   7  -8  -2  221.87    9.42   0
   6  -8  -2   71.93    6.42   0
   5  -8  -2  525.19   10.11   0
   4  -8  -2  353.19    7.69   0
   3  -8  -2 1378.99   12.48   0
  -3   8   2 1482.84   12.68   0
   2  -8  -2 1132.63   11.70   0
  -2   8   2 1052.19    9.90   0
   1  -8  -2  574.01    8.34   0
  -1   8   2  613.29   10.12   0
   0   8   2  271.04    6.96   0
   0  -8  -2  260.79    6.97   0
   1   8   2    8.09    5.79   0
  -1  -8  -2   11.78    5.77   0
   2   8   2   86.35    8.49   0
  -2  -8  -2   54.91    6.06   0
  -3  -8  -2    2.14    5.98   0
   3   8   2   11.05    8.52   0
   4   8   2   59.93    6.82   0
  -4  -8  -2   56.17    6.52   0
  -5  -8  -2  109.13    6.97   0
   5   8   2  105.78    7.24   0
   6   8   2  344.99    8.67   0
  -6  -8  -2  334.23   11.29   0
   7   8   2   45.01    8.36   0
  -7  -8  -2   47.90    8.30   0
  14  -9  -2   25.21    8.25   0
  13  -9  -2  148.64    8.22   0
  12  -9  -2   50.73   10.13   0
  11  -9  -2  256.77    7.87   0
  10  -9  -2  263.84    7.65   0
  10  -9  -2  258.64    7.50   0
   9  -9  -2  248.05    7.39   0
   9  -9  -2  238.53    9.66   0
   8  -9  -2  568.02   10.86   0
   7  -9  -2   96.23    8.92   0
   6  -9  -2   97.74    6.28   0
   5  -9  -2   77.75    8.53   0
   4  -9  -2  158.34    6.53   0
   3  -9  -2  164.60    8.74   0
  -3   9   2  139.83    6.45   0
   2  -9  -2  445.71    9.61   0
  -2   9   2  402.16    7.51   0
   1  -9  -2  566.88   10.28   0
  -1   9   2  534.22    8.37   0
   0   9   2 1060.56    9.91   0
   0  -9  -2 1022.99    9.74   0
   1   9   2  284.18    9.64   0
  -1  -9  -2  286.16    7.39   0
  -2  -9  -2   21.40    6.23   0
   2   9   2   26.48    6.28   0
  -3  -9  -2   26.35    8.99   0
   3   9   2   23.97    6.74   0
  -4  -9  -2   14.59    9.50   0
   4   9   2    7.15    7.01   0
  -5  -9  -2   38.00    7.39   0
   5   9   2   47.08    7.40   0
   6   9   2   36.54    8.17   0
  -6  -9  -2   41.26   11.23   0
  14 -10  -2   23.77    8.12   0
  13 -10  -2    3.68    7.53   0
  12 -10  -2   44.13   10.40   0
  11 -10  -2  291.74    8.30   0
  11 -10  -2  291.76    8.22   0
  10 -10  -2  618.62   11.28   0
  10 -10  -2  577.20    9.07   0
   9 -10  -2  141.04    7.21   0
   9 -10  -2  134.69    7.11   0
   8 -10  -2  273.37    9.81   0
   7 -10  -2  356.90    7.70   0
   6 -10  -2  447.99    8.17   0
   5 -10  -2  429.47    7.84   0
   4 -10  -2  117.24    8.94   0
   3 -10  -2   10.27    5.79   0
  -3  10   2    3.93    8.19   0
  -2  10   2  125.54    6.64   0
   2 -10  -2  119.88    6.63   0
  -1  10   2   54.91    6.17   0
   1 -10  -2   41.97    6.18   0
   0 -10  -2  106.97    6.73   0
   0  10   2  121.11    6.44   0
   1  10   2  636.74   11.23   0
  -1 -10  -2  656.26   11.18   0
  -2 -10  -2  275.99    7.86   0
   2  10   2  284.86   10.36   0
  -3 -10  -2  348.45    8.60   0
   3  10   2  347.60    8.71   0
   4  10   2   27.83   10.54   0
  -4 -10  -2   19.16   10.29   0
   5  10   2    9.73   11.50   0
  -5 -10  -2   17.47   11.30   0
  14 -11  -2   20.84    8.43   0
  14 -11  -2   17.97   11.97   0
  13 -11  -2   39.00    8.23   0
  13 -11  -2   47.83    8.08   0
  12 -11  -2    7.21    7.29   0
  12 -11  -2   -9.82    7.44   0
  11 -11  -2   -0.91    6.92   0
  11 -11  -2   11.39   10.14   0
  10 -11  -2  196.92   10.29   0
  10 -11  -2  189.95    7.59   0
   9 -11  -2   98.97    9.58   0
   9 -11  -2   88.31    6.94   0
   8 -11  -2  147.75    9.53   0
   7 -11  -2  232.63    9.81   0
  -6  11   2  150.22   17.37   0
  -6  11   2  151.89   15.41   0
   6 -11  -2  141.57    7.00   0
   5 -11  -2  563.29   10.63   0
   4 -11  -2   94.36    9.11   0
   3 -11  -2   59.10    6.55   0
  -3  11   2   83.17    6.84   0
   2 -11  -2   15.94    6.77   0
  -2  11   2   13.80    6.26   0
  -1  11   2  153.88    9.75   0
   1 -11  -2  125.86    6.97   0
   0 -11  -2   15.82    9.34   0
   0  11   2   25.38    6.37   0
  -1 -11  -2  100.37    9.86   0
   1  11   2  104.88    9.81   0
   2  11   2   45.98    7.32   0
  -2 -11  -2   47.49   10.21   0
  -3 -11  -2  100.97   10.91   0
   3  11   2  111.73   10.94   0
  -4 -11  -2  161.00    8.79   0
   4  11   2  178.05    8.95   0
  13 -12  -2   95.71   11.85   0
  13 -12  -2   88.63    8.73   0
  12 -12  -2   11.19   11.00   0
  12 -12  -2    5.80    7.86   0
  11 -12  -2   33.14   10.41   0
  11 -12  -2   26.85   10.62   0
  10 -12  -2    7.54    7.07   0
  10 -12  -2    4.76   10.01   0
   9 -12  -2   14.54    6.63   0
   9 -12  -2   12.77    6.79   0
   8 -12  -2   32.83   10.18   0
   7 -12  -2  456.19   10.85   0
   6 -12  -2  260.07   10.01   0
  -6  12   2  290.66   16.91   0
   5 -12  -2  241.58    7.68   0
   4 -12  -2   40.51    6.62   0
   3 -12  -2   86.73    6.87   0
  -2  12   2  318.83   10.72   0
   2 -12  -2  265.78    8.07   0
  -1  12   2   13.52    7.05   0
   1 -12  -2   11.19    6.70   0
   0 -12  -2    6.16    6.87   0
   0  12   2   -7.89    9.87   0
   1  12   2   53.23    7.77   0
  -1 -12  -2   65.04    7.73   0
  -2 -12  -2   77.36   11.22   0
   2  12   2   63.95    8.00   0
  -3 -12  -2   14.28   11.52   0
   3  12   2    9.06    8.21   0
  13 -13  -2  142.58    9.66   0
  13 -13  -2  175.10   13.05   0
  12 -13  -2  198.73   12.23   0
  12 -13  -2  178.46   12.20   0
  11 -13  -2   84.35   11.44   0
  11 -13  -2   78.63    8.18   0
  10 -13  -2   57.43    7.97   0
  10 -13  -2   72.86   11.09   0
   9 -13  -2   12.84   10.18   0
   8 -13  -2   30.69    7.13   0
   7 -13  -2   10.75    6.84   0
   6 -13  -2  136.60    7.58   0
  -6  13   2  158.83   14.45   0
   5 -13  -2  310.92   10.88   0
   4 -13  -2  367.58    8.70   0
   3 -13  -2   44.09    7.26   0
  -2  13   2  110.83    7.49   0
   2 -13  -2  115.08   10.52   0
   1 -13  -2   91.92   10.68   0
  -1  13   2   84.55   10.67   0
   0  13   2  108.58   11.31   0
   0 -13  -2   83.81    8.04   0
  -1 -13  -2   48.75    8.29   0
   1  13   2   58.17    8.42   0
  11 -14  -2  146.94    9.22   0
  11 -14  -2  147.92    9.22   0
  10 -14  -2  215.22    9.38   0
  10 -14  -2  193.38    9.20   0
   9 -14  -2   16.35    7.94   0
   8 -14  -2    3.51   10.88   0
   7 -14  -2   55.00   10.69   0
   6 -14  -2    1.63   10.69   0
  -6  14   2   11.69   13.53   0
   5 -14  -2    8.00    7.49   0
  -5  14   2    7.77   11.08   0
   4 -14  -2   86.26    8.04   0
   3 -14  -2   97.28    8.09   0
   2 -14  -2  170.41    8.64   0
  -1  14   2  204.82    9.02   0
   1 -14  -2  205.56    8.81   0
  10 -15  -2   57.11   12.45   0
  10 -15  -2   62.14   12.54   0
   9 -15  -2  124.21   12.33   0
   8 -15  -2   78.37    8.91   0
   7 -15  -2  186.31    9.28   0
   6 -15  -2    5.49    8.06   0
  -6  15   2    4.73   14.60   0
   5 -15  -2    6.95    7.95   0
  -5  15   2    4.62   11.91   0
   4 -15  -2   13.91    8.17   0
   3 -15  -2   -0.29   11.76   0
  -2  16  -3   33.16   12.82   0
   2 -16   3   27.24   11.71   0
   3 -16   3   21.14    8.58   0
  -3  16  -3   30.19   12.53   0
  -4  16  -3   72.74    9.39   0
   4 -16   3  102.02   11.86   0
  -5  16  -3   34.79   12.77   0
   5 -16   3   35.68    8.89   0
   5 -16   3   46.88   11.98   0
   6 -16   3   84.08   12.08   0
   6 -16   3   97.16   12.39   0
   7 -16   3   29.84    8.79   0
   7 -16   3   41.91   12.43   0
   8 -16   3  129.63   12.84   0
   8 -16   3  102.90    9.70   0
   1  15  -3  100.85   12.92   0
  -1 -15   3   94.14   12.15   0
   0  15  -3  148.71   12.46   0
   0 -15   3  152.49   11.99   0
  -1  15  -3   18.64   11.51   0
   1 -15   3   18.47    8.03   0
   2 -15   3   16.51   10.78   0
  -3  15  -3   15.74   11.05   0
   3 -15   3    8.83   10.77   0
  -4  15  -3   25.07   11.22   0
   4 -15   3   29.36   10.91   0
  -5  15  -3    5.17   11.43   0
   5 -15   3    6.53    8.03   0
   5 -15   3   18.73   10.83   0
   6 -15   3  131.48   11.60   0
   6 -15   3  139.03   11.95   0
   7 -15   3   96.18    8.65   0
   7 -15   3   94.23   11.77   0
   8 -15   3   78.56    8.50   0
   8 -15   3   64.56   11.89   0
   9 -15   3   84.26   12.26   0
   9 -15   3   84.18   12.41   0
  10 -15   3   24.79    8.92   0
  10 -15   3   35.83   12.59   0
  -3 -14   3    2.98    8.25   0
  -2 -14   3   22.95    7.88   0
   1  14  -3   69.40    8.67   0
  -1 -14   3   88.96   10.88   0
   0 -14   3  244.92   11.28   0
   0  14  -3  235.81    9.29   0
  -1  14  -3  200.65    8.88   0
   1 -14   3  199.56   10.79   0
   2 -14   3   21.92    7.25   0
  -3  14  -3   37.81   10.52   0
   3 -14   3   38.65   10.11   0
   4 -14   3   46.30   10.19   0
  -4  14  -3   51.68   10.91   0
   5 -14   3   83.20    7.84   0
   5 -14   3   80.85   10.44   0
  -5  14  -3   83.55   11.22   0
   6 -14   3    7.57    7.64   0
   6 -14   3   12.04    7.43   0
   7 -14   3   71.98    8.02   0
   7 -14   3   68.64    8.08   0
   8 -14   3   71.55   11.35   0
   8 -14   3   51.45   11.21   0
   9 -14   3  235.30   12.18   0
   9 -14   3  162.90    9.12   0
  10 -14   3   75.75    8.64   0
  10 -14   3   68.99   12.17   0
  11 -14   3   34.68    8.78   0
  11 -14   3   34.63    8.86   0
  -4 -13   3    6.24   11.22   0
   4  13  -3   12.98   11.62   0
   3  13  -3   10.31    7.88   0
  -3 -13   3   19.51   10.90   0
  -2 -13   3   18.92   10.05   0
  -1 -13   3   38.04    9.74   0
   0 -13   3    5.57    9.79   0
   0  13  -3    1.89    7.28   0
  -1  13  -3  327.96    9.02   0
   1 -13   3  295.80    8.12   0
   2 -13   3  292.41    8.41   0
  -3  13  -3  468.98   12.46   0
   3 -13   3  445.42   11.37   0
   4 -13   3  295.30    8.48   0
  -4  13  -3  365.34   12.12   0
   5 -13   3   46.50   10.17   0
  -5  13  -3   53.10   10.20   0
   5 -13   3   49.02    6.92   0
   6 -13   3   77.97   10.02   0
   6 -13   3   86.27   10.30   0
   7 -13   3    1.43   10.45   0
   7 -13   3   11.08   10.14   0
   8 -13   3   -1.77    7.26   0
   8 -13   3   12.89   10.14   0
   9 -13   3   89.07   10.70   0
   9 -13   3   70.24    8.02   0
  10 -13   3  163.53    8.90   0
  11 -13   3   97.56    8.80   0
   5  12  -3  149.62    9.07   0
  -5 -12   3  140.37    8.68   0
   4  12  -3  131.81    8.40   0
  -4 -12   3  130.46   11.16   0
   3  12  -3   93.45    7.65   0
  -3 -12   3   87.45   10.10   0
  -2 -12   3  117.53    7.38   0
   2  12  -3  132.26   10.49   0
  -1 -12   3   66.88    9.50   0
   0  12  -3   -2.04    9.68   0
   0 -12   3    2.05    6.38   0
   1 -12   3  118.49    9.68   0
  -1  12  -3  133.04   10.59   0
   2 -12   3  197.13    7.42   0
   3 -12   3   47.38    6.64   0
  -3  12  -3   67.53    9.72   0
   4 -12   3  708.38   11.77   0
  -4  12  -3  792.86   14.24   0
   5 -12   3  307.46   10.72   0
   5 -12   3  308.67   10.47   0
  -5  12  -3  335.05   12.32   0
   6 -12   3  382.30    8.75   0
   6 -12   3  421.75   11.06   0
   7 -12   3   65.61    7.47   0
   7 -12   3   69.10    7.22   0
   8 -12   3    8.41    6.71   0
   9 -12   3   24.94    7.18   0
  10 -12   3    3.93   10.55   0
  11 -12   3   12.71   11.04   0
  12 -12   3   86.06    8.90   0
  -7 -11   3   37.80   12.07   0
   7  11  -3   43.43   12.01   0
  -6 -11   3   73.72   11.42   0
   6  11  -3   69.90   11.55   0
  -5 -11   3   51.77   10.31   0
   5  11  -3   52.59   10.62   0
   4  11  -3   85.17   10.19   0
  -4 -11   3   94.19    9.97   0
  -3 -11   3   61.10    9.55   0
   3  11  -3   53.02    7.11   0
   2  11  -3  438.57    8.81   0
  -2 -11   3  439.87   10.80   0
  -1 -11   3  171.89    7.28   0
   0 -11   3  120.21    9.22   0
   1 -11   3   19.10    8.71   0
  -1  11  -3   26.80    9.16   0
   2 -11   3  183.20    8.05   0
   3 -11   3    2.08    8.51   0
  -3  11  -3    2.38    9.23   0
   4 -11   3   98.16    7.09   0
   4 -11   3  114.43    6.75   0
  -4  11  -3  113.44   10.13   0
  -5  11  -3  221.42   11.24   0
   5 -11   3  205.81    9.85   0
   5 -11   3  202.38    9.91   0
   6 -11   3  335.84    8.56   0
   6 -11   3  352.91    8.52   0
   7 -11   3  732.23   12.37   0
   8 -11   3  126.94   10.01   0
   9 -11   3  153.55   10.24   0
  10 -11   3   24.74    7.26   0
  11 -11   3   37.87    7.75   0
  12 -11   3   20.15   11.34   0
  -8 -10   3   45.70   11.98   0
   8  10  -3   37.39   11.90   0
   7  10  -3   70.61    8.16   0
  -7 -10   3   68.47   11.08   0
  -6 -10   3   30.19    7.15   0
   6  10  -3   28.79   10.21   0
   5  10  -3   67.06    9.79   0
  -5 -10   3   73.60    9.46   0
  -4 -10   3  294.61   10.29   0
   4  10  -3  270.67    8.09   0
   3  10  -3  297.61    8.18   0
  -3 -10   3  307.06   10.14   0
   2  10  -3  215.96    9.83   0
  -2 -10   3  201.19    9.56   0
  -1 -10   3  293.19    7.86   0
   0 -10   3  532.01   10.78   0
   1 -10   3  721.94   11.67   0
  -1  10  -3  820.56   12.66   0
   2 -10   3  123.67    9.21   0
  -3  10  -3   43.66    9.21   0
   3 -10   3   40.64    8.68   0
  -4  10  -3   71.57    9.38   0
   4 -10   3   58.06    6.88   0
   4 -10   3   60.62    9.08   0
   5 -10   3  228.61    8.04   0
   5 -10   3  249.76   10.23   0
   6 -10   3   54.82    6.78   0
   7 -10   3  306.25    8.17   0
   8 -10   3  330.43   10.92   0
   9 -10   3  452.48   17.86   0
   9 -10   3  470.29   11.06   0
  10 -10   3  250.72   16.08   0
  10 -10   3  247.96    8.50   0
  11 -10   3   27.90   11.57   0
  11 -10   3   37.23    7.35   0
  12 -10   3   46.59   14.90   0
  12 -10   3   48.16   11.54   0
  13 -10   3    1.40   15.65   0
  13 -10   3    8.96    8.60   0
  -9  -9   3   66.34   12.58   0
   9   9  -3   60.07    9.03   0
   8   9  -3    6.31   11.00   0
  -8  -9   3   12.72   10.85   0
  -7  -9   3   86.46   10.44   0
   7   9  -3   79.08   10.48   0
  -6  -9   3   32.69    9.70   0
   6   9  -3    3.41    9.78   0
   5   9  -3  100.11    9.51   0
  -5  -9   3  111.37    9.54   0
  -4  -9   3   31.19    6.25   0
   4   9  -3   40.55    8.88   0
   3   9  -3  195.22    9.65   0
  -3  -9   3  181.42    7.04   0
   2   9  -3  257.15    7.87   0
  -2  -9   3  284.69    9.74   0
   1   9  -3  840.52   12.65   0
  -1  -9   3  738.98   10.12   0
   0  -9   3  271.84    9.34   0
  -1   9  -3  345.50    8.25   0
   1  -9   3  313.72    7.64   0
   2  -9   3  553.44    8.91   0
  -3   9  -3  520.27   11.88   0
   3  -9   3  420.36    8.60   0
   4  -9   3  296.65    8.12   0
  -4   9  -3  347.81   11.48   0
   4  -9   3  278.54    8.02   0
   5  -9   3  138.32    7.18   0
   6  -9   3   39.68    6.37   0
   7  -9   3   90.35    9.51   0
   7  -9   3   99.51   12.07   0
   8  -9   3  170.28   11.35   0
   8  -9   3  173.03    9.30   0
   9  -9   3  105.66    9.74   0
   9  -9   3  108.14   11.10   0
  10  -9   3  342.34   15.74   0
  10  -9   3  300.09    8.86   0
  11  -9   3  207.57   12.44   0
  11  -9   3  184.08    8.29   0
  12  -9   3  154.46   13.39   0
  12  -9   3  173.59   11.66   0
  13  -9   3   25.50    8.74   0
  13  -9   3   17.94   12.71   0
   9   8  -3  229.07   12.01   0
  -9  -8   3  202.24   11.97   0
   8   8  -3  133.11    7.91   0
  -8  -8   3  144.59   10.86   0
  -7  -8   3  342.60   10.84   0
   7   8  -3  325.54    8.34   0
  -6  -8   3   81.45    6.69   0
   6   8  -3   84.72    9.15   0
  -5  -8   3   22.14    6.30   0
   5   8  -3   26.83    6.39   0
  -4  -8   3  358.87   10.08   0
   4   8  -3  365.62   10.27   0
   3   8  -3   71.45    8.76   0
  -3  -8   3   48.96    6.07   0
   2   8  -3   39.98    8.06   0
  -2  -8   3   28.79    8.04   0
  -1  -8   3  345.32    7.99   0
   1   8  -3  360.11    8.28   0
   0  -8   3  690.75   11.19   0
   0   8  -3  760.30   10.23   0
  -1   8  -3  302.97    9.98   0
   1  -8   3  249.66    7.26   0
   2  -8   3  576.99   10.89   0
   3  -8   3  213.69    7.61   0
   3  -8   3  235.66    7.72   0
  -3   8  -3  250.30    8.50   0
   4  -8   3  290.53    7.98   0
  -4   8  -3  294.42    9.16   0
   5  -8   3  336.18   11.80   0
   5  -8   3  295.89    7.92   0
   6  -8   3  174.62   10.79   0
   6  -8   3  154.36    9.24   0
   7  -8   3   84.46   10.32   0
   7  -8   3   78.18    6.68   0
   8  -8   3  156.94   10.65   0
   8  -8   3  141.20    6.96   0
   9  -8   3   73.78   10.57   0
   9  -8   3   67.86    6.77   0
  10  -8   3  150.27    9.83   0
  10  -8   3  160.43   11.62   0
  11  -8   3   99.29    7.73   0
  11  -8   3  124.30   11.94   0
  12  -8   3   68.18    8.06   0
  12  -8   3   78.03   12.09   0
  13  -8   3  164.46   10.43   0
  13  -8   3  144.83    9.41   0
 -10  -7   3   17.46    8.11   0
  10   7  -3   33.14   11.23   0
   9   7  -3   20.49   10.33   0
  -9  -7   3   30.01   10.26   0
   8   7  -3   10.15    6.59   0
  -8  -7   3    6.74    6.59   0
  -7  -7   3  246.35   10.04   0
   7   7  -3  229.66    7.66   0
   6   7  -3  885.26   12.53   0
  -6  -7   3  804.40   10.20   0
  -5  -7   3  459.68    8.65   0
   5   7  -3  520.63   10.99   0
  -4  -7   3  501.39   10.70   0
   4   7  -3  467.81    8.99   0
  -3  -7   3   54.28    5.98   0
   3   7  -3   62.31    8.35   0
   2   7  -3    6.40    5.41   0
  -2  -7   3    8.52    7.53   0
   1   7  -3  474.43    9.13   0
  -1  -7   3  464.12    8.85   0
   0  -7   3  148.25    8.94   0
   0   7  -3  156.82    7.10   0
  -1   7  -3   24.92    8.27   0
   1  -7   3   13.56    5.62   0
   2  -7   3 1583.31   14.91   0
   3  -7   3  946.70   12.53   0
  -3   7  -3  943.40   12.84   0
   4  -7   3  306.65    8.29   0
   4  -7   3  366.84   12.58   0
   5  -7   3  685.28    9.26   0
   5  -7   3  763.77   14.39   0
   6  -7   3  335.22   11.66   0
   6  -7   3  299.70    7.57   0
   7  -7   3  844.54   12.75   0
   7  -7   3  808.03    9.69   0
   8  -7   3   11.12    9.70   0
   8  -7   3    9.45    6.30   0
   9  -7   3   43.89   10.37   0
   9  -7   3   44.38    8.85   0
  10  -7   3   47.95   10.74   0
  10  -7   3   36.70    6.76   0
  11  -7   3  208.09   11.97   0
  11  -7   3  155.77    7.69   0
  12  -7   3   26.66    7.57   0
  12  -7   3   29.21    8.32   0
  13  -7   3   97.14   12.00   0
  13  -7   3  102.01    9.53   0
  11   6  -3   53.68   12.09   0
 -11  -6   3   66.40   12.36   0
  10   6  -3   13.79    7.42   0
 -10  -6   3   25.37    7.43   0
   9   6  -3   -3.05    6.87   0
  -9  -6   3    4.63    6.72   0
  -8  -6   3   57.40    9.30   0
   8   6  -3   63.79    9.35   0
  -7  -6   3   34.64    6.43   0
   7   6  -3   43.69    8.82   0
  -6  -6   3  305.00    7.73   0
   6   6  -3  338.77   10.21   0
  -5  -6   3  765.52   10.26   0
   5   6  -3  777.68   10.25   0
   4   6  -3 1112.82   12.07   0
  -4  -6   3 1081.38   11.89   0
  -3  -6   3  844.06   10.99   0
   3   6  -3  857.38   11.19   0
   2   6  -3  469.81   11.04   0
  -2  -6   3  452.87   10.64   0
   1   6  -3 1196.75   15.01   0
  -1  -6   3 1127.25   14.32   0
   0  -6   3    3.44    5.54   0
   0   6  -3    1.84    5.50   0
  -1   6  -3   43.16    6.41   0
   1  -6   3   33.17    6.20   0
   2  -6   3  120.50    6.85   0
   3  -6   3 1720.96   19.22   0
   3  -6   3 1442.09   15.57   0
  -3   6  -3 1468.08   15.73   0
   4  -6   3  632.22   11.59   0
   4  -6   3  614.04    9.29   0
   5  -6   3 2360.88   19.80   0
   5  -6   3 2307.96   14.63   0
  -6   6  -3  606.17    8.75   0
   6  -6   3  634.60   10.57   0
   6  -6   3  622.26   11.45   0
  -7   6  -3  355.61    7.91   0
   7  -6   3  383.94   12.32   0
   7  -6   3  355.22   10.15   0
  -8   6  -3  205.46    9.43   0
   8  -6   3  208.64   11.08   0
   8  -6   3  191.49    7.08   0
   9  -6   3   30.66    8.91   0
  -9   6  -3   25.83    6.21   0
 -10   6  -3  187.48    9.71   0
  10  -6   3  197.36    7.39   0
 -11   6  -3    0.65    6.90   0
  11  -6   3   -3.34    9.75   0
  12  -6   3   55.29   11.10   0
 -12   6  -3   37.88    7.92   0
 -13   6  -3   79.69    8.69   0
  13  -6   3   79.01    8.77   0
 -12  -5   3   44.01   12.61   0
  12   5  -3   32.90    8.93   0
 -11  -5   3  122.87   11.50   0
  11   5  -3  133.78   11.34   0
 -10  -5   3   48.82    7.35   0
  10   5  -3   43.32    7.32   0
  -9  -5   3  387.87   11.03   0
   9   5  -3  394.00   11.01   0
  -8  -5   3   12.92    8.75   0
   8   5  -3    7.63    6.11   0
   7   5  -3    6.53    8.32   0
  -7  -5   3    1.78    5.96   0
   6   5  -3   57.32    8.64   0
  -6  -5   3   17.70    8.29   0
  -5  -5   3  204.10    9.08   0
   5   5  -3  172.02    6.99   0
  -4  -5   3   52.95    7.83   0
   4   5  -3   44.47    7.88   0
  -3  -5   3  241.96    9.65   0
   3   5  -3  243.19    9.64   0
   2   5  -3 1199.55   15.85   0
  -2  -5   3 1199.16   15.57   0
  -1  -5   3 2228.70   20.69   0
   0   5  -3  928.01   13.30   0
   0  -5   3  791.78   14.11   0
  -1   5  -3  321.00    8.67   0
   2  -5   3  201.32   11.16   0
   2  -5   3  183.82   10.13   0
   3  -5   3   28.13    9.49   0
   3  -5   3   29.34    8.13   0
  -4   5  -3    1.01    7.94   0
   4  -5   3    5.12    6.44   0
   4  -5   3    6.11    5.93   0
   5  -5   3   57.10    9.60   0
  -5   5  -3   55.10    8.25   0
   5  -5   3   52.85    6.00   0
  -6   5  -3  745.63   11.15   0
   6  -5   3  493.37   10.77   0
   6  -5   3  700.01    9.37   0
  -7   5  -3  786.76    9.28   0
   7  -5   3  764.58    9.35   0
   8  -5   3  633.29   11.61   0
  -8   5  -3  612.62    8.74   0
  -9   5  -3  102.79    6.54   0
   9  -5   3   96.49    6.59   0
  10  -5   3  181.35    7.38   0
 -10   5  -3  190.01    9.76   0
 -11   5  -3  212.50    7.90   0
  11  -5   3  196.97    8.14   0
  12  -5   3   63.30   11.15   0
 -12   5  -3   75.81    7.97   0
  13  -5   3   21.71   12.22   0
 -13   5  -3   30.29    8.45   0
  12   4  -3   67.85    8.38   0
 -12  -4   3   76.00   11.79   0
 -11  -4   3  139.52    8.17   0
  11   4  -3  141.72    8.17   0
 -10  -4   3   22.29    7.16   0
  10   4  -3   23.42    9.69   0
   9   4  -3  361.87    8.37   0
  -9  -4   3  432.68   10.98   0
   8   4  -3  358.68   10.16   0
  -8  -4   3  332.65    8.09   0
   7   4  -3  231.77    7.53   0
  -7  -4   3  220.17    7.44   0
  -6  -4   3  371.91    9.97   0
   6   4  -3  376.93   10.00   0
  -5  -4   3  287.49    9.50   0
   5   4  -3  287.12    9.49   0
  -4  -4   3   48.88    7.99   0
   4   4  -3   46.33    5.99   0
   3   4  -3  101.67    8.87   0
  -3  -4   3   96.39    8.82   0
   2   4  -3  512.76   13.01   0
  -2  -4   3  489.51   12.70   0
  -1  -4   3 1191.32   18.24   0
   1   4  -3 1435.27   15.42   0
   0   4  -3 4831.39   25.86   0
   1  -4   3 3792.65   25.07   0
  -1   4  -3 3832.99   24.04   0
   2  -4   3 1629.32   16.44   0
  -2   4  -3 1595.23   16.61   0
   2  -4   3 1561.00   16.63   0
  -3   4  -3  192.29    7.31   0
   3  -4   3  223.75   10.68   0
   3  -4   3  195.16    7.30   0
   4  -4   3   64.75    9.99   0
  -4   4  -3   57.41    6.62   0
   4  -4   3   65.24    6.30   0
   5  -4   3  960.51   10.50   0
  -5   4  -3  950.55   10.19   0
   6  -4   3   28.14    8.26   0
  -6   4  -3   35.74    5.83   0
  -7   4  -3  126.32    6.50   0
   7  -4   3  137.29    6.90   0
   8  -4   3  956.31    9.99   0
  -8   4  -3  964.98    9.71   0
   9  -4   3  601.02    8.91   0
  -9   4  -3  597.51    8.44   0
 -10   4  -3  222.59    9.87   0
  10  -4   3  204.48    7.54   0
 -11   4  -3  338.91   11.22   0
  11  -4   3  283.12    9.03   0
  12  -4   3   89.93    8.38   0
 -12   4  -3   92.83    8.08   0
  13  -4   3   72.74    9.16   0
 -13   4  -3   78.64    8.72   0
 -13  -3   3    6.47    8.66   0
  13   3  -3    7.73   12.05   0
 -12  -3   3   -0.51    7.66   0
  12   3  -3    3.08    7.51   0
  11   3  -3  179.11   10.66   0
 -11  -3   3  167.73    8.08   0
  10   3  -3  175.73   10.03   0
 -10  -3   3  165.06    7.66   0
   9   3  -3  357.84   10.20   0
  -9  -3   3  327.88    8.01   0
  -8  -3   3  421.62   10.45   0
   8   3  -3  382.15    8.20   0
   7   3  -3   24.03    8.38   0
  -7  -3   3   29.78    8.04   0
   6   3  -3 1105.80   11.93   0
  -6  -3   3 1108.07   12.09   0
   5   3  -3  135.39    8.71   0
  -5  -3   3  128.61    8.76   0
   4   3  -3    4.07    7.98   0
  -4  -3   3    2.61    8.02   0
   3   3  -3   12.44    7.67   0
  -3  -3   3    9.37    7.67   0
   2   3  -3 2986.06   34.90   0
  -2  -3   3 2888.57   33.88   0
   1   3  -3  497.23   10.60   0
  -1  -3   3  420.55   15.36   0
   0  -3   3  650.09   15.88   0
   0   3  -3  691.47   12.41   0
  -1   3  -3  649.28   13.61   0
   1  -3   3  659.14   12.10   0
  -1   3  -3  708.96   14.02   0
   2  -3   3 1317.27   15.53   0
   2  -3   3 1328.29   15.02   0
  -2   3  -3 1350.26   15.33   0
  -3   3  -3 2023.58   16.10   0
   3  -3   3 2030.32   16.11   0
  -4   3  -3  204.38    7.05   0
   4  -3   3  184.77    7.05   0
   5  -3   3  372.70    7.68   0
  -5   3  -3  371.62    7.66   0
  -6   3  -3   38.99    8.29   0
   6  -3   3   47.40    6.04   0
   7  -3   3   15.73    6.02   0
  -7   3  -3   27.86    5.95   0
  -8   3  -3   -4.20    5.94   0
   8  -3   3    8.52    5.95   0
  -9   3  -3  101.61    6.62   0
   9  -3   3  108.63    9.08   0
 -10   3  -3   30.89    6.71   0
  10  -3   3   28.44    9.43   0
 -11   3  -3  375.07   11.53   0
  11  -3   3  326.24    9.00   0
  12  -3   3  145.07    8.59   0
 -12   3  -3  168.01    8.60   0
 -13  -2   3   14.50   11.74   0
  13   2  -3    5.19    8.37   0
  12   2  -3   11.63   10.03   0
 -12  -2   3   13.45   10.31   0
  11   2  -3   40.34    6.83   0
 -11  -2   3   36.00    7.13   0
 -10  -2   3   68.63    9.49   0
  10   2  -3   62.02    9.33   0
  -9  -2   3  150.10    9.57   0
   9   2  -3  113.19    6.88   0
   8   2  -3  647.11    9.64   0
  -8  -2   3  631.05    9.68   0
   7   2  -3  344.49    7.92   0
  -7  -2   3  368.30    8.40   0
   6   2  -3  483.64    9.01   0
  -6  -2   3  508.39   10.81   0
  -5  -2   3 1178.48   15.06   0
   5   2  -3 1190.01   14.72   0
   4   2  -3  874.25   14.48   0
  -4  -2   3  871.38   14.97   0
   3   2  -3 4622.92   39.22   0
  -3  -2   3 4539.44   39.57   0
   2   2  -3  180.59    8.45   0
  -1  -2   3    9.75   11.54   0
   1   2  -3    4.59   12.81   0
  -1  -2   3    3.39    7.53   0
   1   2  -3  166.23    9.15   0
   0   2  -3  593.68   14.90   0
   0  -2   3  591.58   14.87   0
   0   2  -3  537.55   14.91   0
   1  -2   3  257.12   10.93   0
   1  -2   3  274.44   13.05   0
  -1   2  -3  242.16    8.90   0
   2  -2   3   74.28    6.46   0
  -2   2  -3   74.20    6.42   0
  -3   2  -3  721.07    9.70   0
   3  -2   3  791.74   11.72   0
  -4   2  -3  738.66    9.56   0
   4  -2   3  767.35   11.12   0
   5  -2   3 1601.42   12.24   0
  -5   2  -3 1539.00   11.84   0
   6  -2   3  949.41   11.29   0
  -6   2  -3  865.97    9.31   0
  -7   2  -3   48.08    8.36   0
   7  -2   3   52.14    6.08   0
  -8   2  -3   35.97    6.05   0
   8  -2   3   41.26    8.64   0
   9  -2   3   -0.42    6.15   0
  -9   2  -3    4.16    9.38   0
  10  -2   3    6.94    9.66   0
 -10   2  -3    7.65    6.55   0
  11  -2   3   18.32    7.36   0
 -11   2  -3   10.69   10.31   0
 -12   2  -3  158.37    8.79   0
  12  -2   3  153.81    8.78   0
 -14  -1   3  174.36   13.05   0
  14   1  -3  139.68    9.54   0
  13   1  -3  152.37    8.75   0
 -13  -1   3  155.35    8.76   0
 -12  -1   3    9.67   10.18   0
  12   1  -3   16.17    7.17   0
 -11  -1   3  134.62    7.42   0
  11   1  -3  143.99   10.11   0
  10   1  -3   79.10    9.07   0
 -10  -1   3   60.95    6.56   0
   9   1  -3  176.06    9.14   0
  -9  -1   3  158.55    7.10   0
  -8  -1   3    4.89    5.72   0
   8   1  -3   21.47    8.20   0
   7   1  -3  541.20   10.77   0
  -7  -1   3  539.42   10.77   0
  -6  -1   3 1499.43   15.59   0
   6   1  -3 1435.66   13.81   0
  -5  -1   3 1375.46   15.36   0
   5   1  -3 1369.78   14.86   0
   4   1  -3  446.56   12.08   0
  -4  -1   3  445.34   12.69   0
   3   1  -3 2452.51   20.51   0
   3   1  -3 2209.63   28.38   0
   2   1  -3 1979.51   19.04   0
  -2  -1   3 2095.35   20.65   0
   2   1  -3 1682.37   34.23   0
   1   1  -3  129.74    9.22   0
  -1  -1   3  135.11   12.40   0
   1   1  -3  110.18   11.63   0
  -1  -1   3  110.10   11.24   0
   0  -1   3 1643.19   18.21   0
   0   1  -3 1552.92   19.86   0
   0   1  -3 1632.92   18.17   0
  -1   1  -3 1516.18   16.98   0
   1  -1   3 1424.42   15.14   0
  -2   1  -3  148.87    9.12   0
   2  -1   3  155.35    8.96   0
   3  -1   3  828.50    9.91   0
  -3   1  -3  820.35    9.80   0
   4  -1   3  890.55   11.32   0
  -4   1  -3  810.40    9.48   0
  -5   1  -3  203.86    6.48   0
   5  -1   3  194.26    6.58   0
   6  -1   3 1059.91   10.15   0
  -6   1  -3 1121.27   11.56   0
   7  -1   3  283.78    7.26   0
  -7   1  -3  318.89    9.06   0
   8  -1   3  267.54    7.34   0
  -8   1  -3  209.51    6.88   0
   9  -1   3   34.94    8.97   0
  -9   1  -3   35.98    6.40   0
  10  -1   3   14.64    6.99   0
 -10   1  -3    3.93    6.67   0
  11  -1   3   -7.45   10.56   0
 -11   1  -3   -6.30   10.50   0
  12  -1   3   45.85    8.47   0
 -12   1  -3   41.53   11.75   0
  14   0  -3   30.33   11.89   0
 -14   0   3   26.27    8.43   0
  13   0  -3  231.33    8.89   0
 -13   0   3  219.71    8.87   0
  12   0  -3  178.99    8.13   0
 -12   0   3  197.16   11.06   0
 -11   0   3  479.93   11.31   0
  11   0  -3  444.76   11.22   0
 -10   0   3  153.22    7.26   0
  10   0  -3  150.49    7.24   0
   9   0  -3   86.27    8.79   0
  -9   0   3   72.21    9.05   0
   8   0  -3   44.44    6.07   0
  -8   0   3   34.79    8.72   0
   7   0  -3   63.21    8.28   0
  -7   0   3   55.91    6.52   0
  -6   0   3    1.73    8.19   0
   6   0  -3    0.69    7.55   0
   5   0  -3  970.38   14.44   0
  -5   0   3  924.02   14.90   0
   4   0  -3 2362.62   21.86   0
   4   0  -3 2463.95   19.25   0
   3   0  -3 1298.13   16.58   0
  -2   0   3  764.55   14.07   0
   2   0  -3  735.08   13.94   0
   2   0  -3  664.44   16.09   0
   1   0  -3  462.65   12.37   0
  -1   0   3  484.17   12.32   0
   1   0  -3  413.38   11.61   0
   0   0  -3  854.18   15.00   0
   0   0   3  849.45   14.82   0
   1   0   3 2864.46   19.88   0
  -1   0  -3 2657.61   18.42   0
  -2   0  -3  185.65    6.95   0
   2   0   3  203.33    8.95   0
  -3   0  -3   35.63    8.13   0
   3   0   3   27.75    5.67   0
  -4   0  -3 1508.94   12.89   0
   4   0   3 1372.38   11.33   0
   5   0   3  254.06    7.10   0
  -5   0  -3  262.22    6.70   0
  -6   0  -3  576.98    9.96   0
   6   0   3  553.51    8.16   0
   7   0   3  366.39    7.38   0
  -7   0  -3  399.26    7.37   0
   8   0   3  280.42    7.39   0
  -8   0  -3  312.00    7.37   0
   9   0   3  479.56    8.81   0
  -9   0  -3  488.12    8.47   0
  10   0   3   92.82    7.66   0
 -10   0  -3   94.27    7.41   0
  11   0   3   27.62   10.90   0
 -11   0  -3   27.04    7.90   0
  14  -1  -3    1.96   11.68   0
 -13   1   3   10.38    7.56   0
  13  -1  -3   10.76    7.63   0
 -12   1   3  100.29    7.73   0
  12  -1  -3  101.82   10.49   0
  11  -1  -3  511.77    9.15   0
 -11   1   3  510.97   11.35   0
  10  -1  -3 1160.08   11.72   0
 -10   1   3 1156.16   11.52   0
  -9   1   3  179.41    6.97   0
   9  -1  -3  179.48    7.28   0
   8  -1  -3  354.45   10.22   0
  -8   1   3  354.98    8.33   0
  -7   1   3   70.44    6.42   0
   7  -1  -3   75.44    6.36   0
   6  -1  -3   82.98    6.22   0
   5  -1  -3  615.28   10.68   0
   5  -1  -3  696.21   11.51   0
   4  -1  -3  738.32   17.11   0
  -3   1   3  313.82   12.08   0
   3  -1  -3  282.37   10.82   0
   3  -1  -3  297.46   11.99   0
  -2   1   3 1561.85   20.27   0
   2  -1  -3 1397.23   18.10   0
   2  -1  -3 1285.71   17.65   0
  -2   1   3 1431.65   17.98   0
  -1   1   3 2161.48   19.93   0
   1  -1  -3 2053.07   18.50   0
   0   1   3 3056.92   19.84   0
   0  -1  -3 3269.14   21.51   0
  -1  -1  -3 2047.69   16.35   0
   1   1   3 1934.50   14.83   0
   2   1   3  546.17   10.35   0
  -2  -1  -3  492.87    8.48   0
   3   1   3   50.22    7.85   0
  -3  -1  -3   44.69    7.98   0
  -4  -1  -3    7.65    5.38   0
   4   1   3    6.77    5.41   0
   5   1   3    7.82    8.04   0
  -5  -1  -3   12.50    5.67   0
   6   1   3   86.41    8.38   0
  -6  -1  -3   72.86    6.07   0
  -7  -1  -3  758.71   10.69   0
   7   1   3  711.04    9.04   0
  -8  -1  -3   46.02    6.44   0
   8   1   3   78.50    9.41   0
   9   1   3  135.14   10.09   0
  -9  -1  -3  122.26    7.02   0
 -10  -1  -3  190.99   10.86   0
  10   1   3  180.79   11.02   0
  11   1   3  151.99   11.80   0
 -11  -1  -3  167.20   11.81   0
  14  -2  -3   20.64    8.10   0
  13  -2  -3    7.82    7.45   0
  12  -2  -3  153.14   10.44   0
  11  -2  -3   46.94    9.18   0
  10  -2  -3  421.68    8.52   0
   9  -2  -3  321.08    9.99   0
   8  -2  -3 1208.77   13.66   0
   7  -2  -3 1992.03   16.96   0
   6  -2  -3  743.90   13.42   0
   6  -2  -3  671.68   11.45   0
   5  -2  -3  398.62   10.89   0
   5  -2  -3  442.50   12.64   0
   4  -2  -3   25.83    8.82   0
  -4   2   3   22.77    5.92   0
   4  -2  -3   19.10    5.89   0
  -3   2   3    9.81    8.73   0
   3  -2  -3    9.50    9.55   0
   3  -2  -3    9.42    6.29   0
  -3   2   3   11.91    8.82   0
   2  -2  -3    1.89    9.08   0
  -2   2   3    1.79    6.20   0
  -2   2   3    7.26    9.97   0
   1  -2  -3 2111.43   16.68   0
  -1   2   3 2265.09   17.99   0
   0  -2  -3 2095.28   15.50   0
   0   2   3 2216.19   16.73   0
  -1  -2  -3 4155.12   19.69   0
   1   2   3 4265.44   19.85   0
  -2  -2  -3 1007.58   11.71   0
   2   2   3 1029.23   11.80   0
  -3  -2  -3  382.58    7.38   0
   3   2   3  418.95    9.37   0
  -4  -2  -3  719.80    8.59   0
   4   2   3  749.60    8.88   0
   5   2   3  497.78    9.74   0
  -5  -2  -3  482.80    9.55   0
   6   2   3  634.33   10.32   0
  -6  -2  -3  616.28   10.09   0
   7   2   3  111.92    8.74   0
  -7  -2  -3  119.14    8.69   0
   8   2   3  108.21    6.89   0
  -8  -2  -3  108.20    6.78   0
  -9  -2  -3   79.51    9.97   0
   9   2   3   69.34    7.37   0
  10   2   3  202.71   11.49   0
 -10  -2  -3  178.70    8.27   0
  15  -3  -3   73.46    9.32   0
  14  -3  -3   59.14   11.76   0
  13  -3  -3  257.44   11.39   0
  12  -3  -3   -8.21    9.76   0
  11  -3  -3   16.82    6.38   0
  10  -3  -3   86.98    9.32   0
   9  -3  -3  170.92    9.44   0
   8  -3  -3   69.94    6.56   0
   7  -3  -3  956.14   12.37   0
   7  -3  -3 1051.29   15.59   0
   6  -3  -3 1685.06   22.02   0
   6  -3  -3 1556.48   13.95   0
   5  -3  -3 2969.70   28.31   0
  -4   3   3  834.36   16.31   0
   4  -3  -3  743.51   10.57   0
  -3   3   3   10.59    8.83   0
  -3   3   3    6.00    8.31   0
   3  -3  -3   17.80    8.19   0
   2  -3  -3   46.25    6.17   0
  -2   3   3   47.23    5.85   0
   1  -3  -3  309.75    9.64   0
  -1   3   3  279.01    7.58   0
   0  -3  -3   32.07    8.10   0
   0   3   3   26.06    5.65   0
   1   3   3  973.06   11.63   0
  -1  -3  -3  887.14    9.90   0
  -2  -3  -3 1889.86   13.90   0
   2   3   3 1855.57   12.61   0
  -3  -3  -3  476.27    7.74   0
   3   3   3  458.92    7.70   0
  -4  -3  -3  503.00    7.78   0
   4   3   3  577.68    9.83   0
  -5  -3  -3   83.37    8.45   0
   5   3   3   90.36    8.41   0
  -6  -3  -3  307.59    7.51   0
   6   3   3  318.10    7.59   0
  -7  -3  -3   97.50    6.73   0
   7   3   3  100.35    6.71   0
   8   3   3   27.74    9.69   0
  -8  -3  -3   21.93    9.35   0
   9   3   3   -0.47    7.22   0
  -9  -3  -3   -2.78   10.40   0
  10   3   3  137.25    8.76   0
 -10  -3  -3  138.46    8.61   0
  15  -4  -3   99.10    9.19   0
  14  -4  -3   46.20    8.12   0
  13  -4  -3  123.17    8.02   0
  12  -4  -3  196.85   10.24   0
  11  -4  -3   33.25    6.47   0
  10  -4  -3   98.09    9.48   0
   9  -4  -3  187.48   10.75   0
   9  -4  -3  169.44    7.15   0
   8  -4  -3  131.55    9.99   0
   8  -4  -3  123.52    8.89   0
   7  -4  -3  367.92    8.31   0
   7  -4  -3  424.74   13.68   0
   6  -4  -3  464.73   14.44   0
   5  -4  -3  643.70   11.31   0
   4  -4  -3 2144.40   15.07   0
  -4   4   3 2455.24   25.77   0
   3  -4  -3  583.28   10.85   0
  -3   4   3  538.89    8.66   0
  -2   4   3 1156.86   12.44   0
   2  -4  -3 1058.10   10.97   0
   1  -4  -3   96.11    6.12   0
  -1   4   3   91.89    5.98   0
   0   4   3  246.42    6.97   0
   0  -4  -3  259.00    9.05   0
  -1  -4  -3  165.09    8.33   0
   1   4   3  156.82    6.19   0
   2   4   3   94.11    5.82   0
  -2  -4  -3   97.15    5.88   0
   3   4   3   87.43    5.89   0
  -3  -4  -3  100.28    7.97   0
  -4  -4  -3  563.40    9.79   0
   4   4   3  517.22    7.91   0
   5   4   3  753.44    8.80   0
  -5  -4  -3  742.42    8.89   0
   6   4   3  495.75    8.49   0
  -6  -4  -3  553.17   10.41   0
  -7  -4  -3  147.33    9.73   0
   7   4   3  168.26    9.72   0
   8   4   3   15.38    6.83   0
  -8  -4  -3   10.38    9.70   0
  -9  -4  -3   66.51   11.16   0
   9   4   3   62.99   10.85   0
  15  -5  -3  121.98    9.20   0
  15  -5  -3  130.24   13.14   0
  14  -5  -3  156.12    8.74   0
  14  -5  -3  163.34    9.28   0
  13  -5  -3  159.72   10.72   0
  12  -5  -3  186.16   11.37   0
  12  -5  -3  156.50    7.58   0
  11  -5  -3   75.98    9.49   0
  11  -5  -3   82.29    9.89   0
  10  -5  -3  735.08   15.23   0
  10  -5  -3  702.78   11.65   0
   9  -5  -3  247.59   11.81   0
   9  -5  -3  237.21    7.68   0
   8  -5  -3   48.38    8.70   0
   8  -5  -3   32.89   12.32   0
   7  -5  -3    3.05   11.01   0
   7  -5  -3   -1.57    5.87   0
   6  -5  -3  837.27    9.89   0
  -5   5   3   47.57   10.30   0
   5  -5  -3   46.53    8.20   0
   4  -5  -3  615.70   11.08   0
  -4   5   3  606.87   14.27   0
  -3   5   3  889.17    9.96   0
   3  -5  -3  924.02   10.17   0
  -2   5   3  877.10    9.89   0
   2  -5  -3  928.39   11.62   0
   1  -5  -3 2520.57   14.64   0
  -1   5   3 2737.04   16.10   0
   0   5   3  208.29    6.68   0
   0  -5  -3  191.00    6.55   0
  -1  -5  -3  111.25    6.06   0
   1   5   3  105.94    5.97   0
  -2  -5  -3   50.04    5.95   0
   2   5   3   63.10    8.10   0
  -3  -5  -3   28.66    8.11   0
   3   5   3   28.60    5.73   0
  -4  -5  -3   82.98    8.29   0
   4   5   3   64.77    6.36   0
   5   5   3  296.34    7.33   0
  -5  -5  -3  300.39    7.38   0
   6   5   3  220.80    7.42   0
  -6  -5  -3  224.03    9.73   0
   7   5   3  389.26    8.47   0
  -7  -5  -3  379.78    8.31   0
   8   5   3  117.01    7.92   0
  -8  -5  -3  105.50    7.80   0
   9   5   3   40.28   11.62   0
  -9  -5  -3   29.76   11.52   0
  15  -6  -3   -1.99   12.17   0
  15  -6  -3    3.72    8.24   0
  14  -6  -3   54.44   11.52   0
  14  -6  -3   40.10    7.87   0
  13  -6  -3  102.47   11.17   0
  13  -6  -3  100.72   10.39   0
  12  -6  -3  505.51    9.47   0
  12  -6  -3  548.65   16.42   0
  11  -6  -3  330.13   13.56   0
  11  -6  -3  323.85   10.76   0
  10  -6  -3  337.69   10.27   0
  10  -6  -3  353.19   15.45   0
   9  -6  -3  362.51    8.20   0
   9  -6  -3  371.52   21.45   0
   8  -6  -3  174.84    7.04   0
   7  -6  -3  498.87    8.28   0
   6  -6  -3   36.09    5.90   0
  -5   6   3  554.89   16.52   0
   5  -6  -3  561.98    8.81   0
   4  -6  -3  371.80    7.65   0
  -3   6   3  852.31   11.18   0
   3  -6  -3  764.90    9.50   0
   2  -6  -3   28.63    5.54   0
  -2   6   3   23.66    5.68   0
  -1   6   3  757.63   10.31   0
   1  -6  -3  695.68    8.70   0
   0   6   3  541.95    9.82   0
   0  -6  -3  563.13   10.03   0
   1   6   3  669.40    8.46   0
  -1  -6  -3  716.14   10.30   0
   2   6   3  349.46    9.15   0
  -2  -6  -3  337.16    9.22   0
   3   6   3   70.41    8.63   0
  -3  -6  -3   48.75    7.86   0
   4   6   3   25.21    6.18   0
  -4  -6  -3   31.21    6.13   0
   5   6   3  103.22    6.90   0
  -5  -6  -3  114.88    9.30   0
  -6  -6  -3   15.40    6.64   0
   6   6   3   20.49    9.47   0
   7   6   3   10.16    7.16   0
  -7  -6  -3    0.99    6.96   0
   8   6   3  124.30    8.66   0
  -8  -6  -3  129.57    8.64   0
  15  -7  -3   38.24   11.96   0
  15  -7  -3   32.18   12.69   0
  14  -7  -3    4.25   11.08   0
  14  -7  -3    5.62    7.85   0
  13  -7  -3    8.45   12.90   0
  13  -7  -3   -1.30    7.11   0
  12  -7  -3    8.25   14.55   0
  12  -7  -3   10.90    9.58   0
  11  -7  -3  401.73   11.14   0
  10  -7  -3  370.10   10.60   0
   9  -7  -3  569.22    8.93   0
   8  -7  -3  229.74    7.26   0
   7  -7  -3  257.91    7.26   0
   6  -7  -3  275.94    7.78   0
  -5   7   3  304.57   13.92   0
   5  -7  -3  276.26    7.31   0
  -4   7   3  365.14    7.50   0
   4  -7  -3  335.40    7.30   0
  -3   7   3  206.93    6.72   0
   3  -7  -3  199.95    6.76   0
  -2   7   3  180.96    8.56   0
   2  -7  -3  174.87    8.62   0
  -1   7   3  634.45    8.39   0
   1  -7  -3  631.55    8.42   0
   0  -7  -3  323.70    7.07   0
   0   7   3  372.99    9.04   0
  -1  -7  -3  207.79    6.65   0
   1   7   3  218.60    8.57   0
   2   7   3  429.46    7.95   0
  -2  -7  -3  459.48    7.84   0
  -3  -7  -3  258.00    9.41   0
   3   7   3  255.08    9.50   0
   4   7   3  354.90    7.83   0
  -4  -7  -3  360.20   10.03   0
   5   7   3   13.31    6.74   0
  -5  -7  -3    4.36    6.58   0
   6   7   3   65.03   10.28   0
  -6  -7  -3   52.13   10.10   0
   7   7   3   14.08    7.90   0
  -7  -7  -3   13.92   10.89   0
  15  -8  -3  150.56    9.53   0
  14  -8  -3   46.15    7.95   0
  13  -8  -3    0.41   10.31   0
  12  -8  -3   95.18    7.59   0
  11  -8  -3   15.03    6.83   0
  10  -8  -3   82.51    6.74   0
  10  -8  -3   81.84    6.72   0
   9  -8  -3  626.10    8.96   0
   9  -8  -3  611.25   10.96   0
   8  -8  -3  646.16    9.16   0
   7  -8  -3  397.29   10.08   0
   6  -8  -3  617.51    8.75   0
  -6   8   3  647.82   28.99   0
   5  -8  -3  442.55    9.87   0
   4  -8  -3  643.00    8.60   0
  -4   8   3  690.14    8.68   0
   3  -8  -3  237.70    6.88   0
  -3   8   3  274.28    9.05   0
   2  -8  -3   -4.16    5.60   0
  -2   8   3    1.09    7.89   0
   1  -8  -3   16.03    5.70   0
  -1   8   3   15.81    5.76   0
   0   8   3  872.99   10.67   0
   0  -8  -3  842.02   10.61   0
  -1  -8  -3  555.33    8.18   0
   1   8   3  571.89    8.28   0
  -2  -8  -3  491.27   10.10   0
   2   8   3  435.67    8.09   0
  -3  -8  -3  302.55    9.83   0
   3   8   3  301.54    7.52   0
   4   8   3  208.09    7.56   0
  -4  -8  -3  202.58    7.50   0
  -5  -8  -3  353.13    8.28   0
   5   8   3  311.74    8.48   0
  -6  -8  -3   43.31    7.69   0
   6   8   3   48.80   11.01   0
  15  -9  -3   75.66    8.74   0
  14  -9  -3  193.66   11.98   0
  13  -9  -3   60.56    7.93   0
  12  -9  -3  140.85    7.64   0
  11  -9  -3    9.02    6.81   0
  11  -9  -3   -3.39    6.82   0
  10  -9  -3   17.07    6.89   0
  10  -9  -3   19.11    9.43   0
   9  -9  -3   27.98    8.77   0
   9  -9  -3   29.48    8.79   0
   8  -9  -3   30.89    6.39   0
   7  -9  -3   58.43    8.72   0
   6  -9  -3  878.84    9.89   0
  -6   9   3 1015.21   24.48   0
   5  -9  -3 1152.84   10.47   0
   4  -9  -3  365.32    9.47   0
  -4   9   3  370.67    7.51   0
   3  -9  -3  107.87    6.40   0
  -3   9   3  113.23    8.87   0
   2  -9  -3   51.41    8.37   0
  -2   9   3    7.16    6.01   0
   1  -9  -3  442.40    8.03   0
  -1   9   3  477.63   10.30   0
   0   9   3   81.65    6.44   0
   0  -9  -3   96.39    9.04   0
   1   9   3   61.21    8.87   0
  -1  -9  -3   66.38    9.11   0
   2   9   3   97.58    9.61   0
  -2  -9  -3   98.76    6.92   0
  -3  -9  -3  210.09   10.14   0
   3   9   3  179.73    7.50   0
  -4  -9  -3   17.22    9.81   0
   4   9   3   24.63    9.86   0
  -5  -9  -3  100.81    7.95   0
   5   9   3   88.25    8.15   0
  14 -10  -3   66.83    8.72   0
  14 -10  -3   54.54   11.71   0
  13 -10  -3   75.73    8.14   0
  13 -10  -3   97.82   11.33   0
  12 -10  -3  302.77    8.91   0
  12 -10  -3  316.24    9.08   0
  11 -10  -3  391.05    9.02   0
  11 -10  -3  399.16   11.70   0
  10 -10  -3   15.87    6.74   0
  10 -10  -3   23.36    6.79   0
   9 -10  -3   79.97    6.90   0
   8 -10  -3   10.51    6.26   0
   7 -10  -3    6.48    6.00   0
  -6  10   3    8.94   11.79   0
   6 -10  -3   24.17    8.59   0
   5 -10  -3  634.12   10.70   0
   4 -10  -3  373.44    9.66   0
   3 -10  -3  744.58    9.02   0
  -3  10   3  762.75    9.01   0
  -2  10   3  123.08    6.66   0
   2 -10  -3  132.52    6.61   0
   1 -10  -3  257.07    7.57   0
  -1  10   3  293.22    7.42   0
   0  10   3  236.05    9.83   0
   0 -10  -3  247.35    9.80   0
   1  10   3   43.77    9.53   0
  -1 -10  -3   40.67    9.54   0
  -2 -10  -3  103.44   10.21   0
   2  10   3   81.56    7.40   0
   3  10   3   25.70   10.01   0
  -3 -10  -3   12.90    7.18   0
   4  10   3   60.76   11.21   0
  -4 -10  -3   50.59    7.92   0
  14 -11  -3   35.24   12.08   0
  14 -11  -3   39.23    8.80   0
  13 -11  -3   65.62    8.16   0
  13 -11  -3   84.14   11.31   0
  12 -11  -3   68.59    7.59   0
  12 -11  -3  105.76   10.87   0
  11 -11  -3  311.43   11.52   0
  11 -11  -3  311.57    8.79   0
  10 -11  -3  221.25   10.59   0
  10 -11  -3  222.18   10.65   0
   9 -11  -3  387.54    8.33   0
   8 -11  -3   92.99    6.81   0
   7 -11  -3    1.42    6.16   0
  -6  11   3    8.74    9.77   0
   6 -11  -3    7.96    6.43   0
   5 -11  -3   74.22    7.07   0
   4 -11  -3   20.21    8.90   0
   3 -11  -3  151.00    9.69   0
  -3  11   3  151.95    9.58   0
  -2  11   3  457.05   10.45   0
   2 -11  -3  375.41   10.46   0
   1 -11  -3  193.11    9.88   0
  -1  11   3  185.97    7.16   0
   0 -11  -3  326.49   10.58   0
   0  11   3  361.50   10.69   0
   1  11   3   20.03    7.24   0
  -1 -11  -3   18.47    9.86   0
   2  11   3   48.84    7.57   0
  -2 -11  -3   38.11    7.47   0
   3  11   3   47.59    7.95   0
  -3 -11  -3   40.96    7.98   0
  13 -12  -3   50.09    8.43   0
  13 -12  -3   62.59   11.92   0
  12 -12  -3   82.25   11.44   0
  12 -12  -3   90.26   11.21   0
  11 -12  -3   65.47    8.07   0
  11 -12  -3   59.17    7.97   0
  10 -12  -3   93.71    7.49   0
  10 -12  -3  106.95    7.39   0
   9 -12  -3  118.21   10.23   0
   8 -12  -3  285.69    8.15   0
   7 -12  -3  166.71    7.93   0
   6 -12  -3  164.98   10.15   0
   5 -12  -3    3.61    6.95   0
   4 -12  -3   30.40    9.31   0
   3 -12  -3   10.14    6.85   0
  -3  12   3   13.39    9.59   0
  -2  12   3   27.13    6.88   0
   2 -12  -3   35.19    7.05   0
   1 -12  -3   52.91    7.17   0
  -1  12   3   70.69   10.08   0
   0  12   3  370.22   11.40   0
   0 -12  -3  346.21   11.41   0
  -1 -12  -3  240.74   11.73   0
   1  12   3  248.18    8.93   0
   2  12   3   44.16   11.79   0
  -2 -12  -3   41.59    8.32   0
  12 -13  -3   12.56    8.28   0
  12 -13  -3  -13.04   11.60   0
  11 -13  -3    8.16    8.25   0
  11 -13  -3   11.01    8.19   0
  10 -13  -3  138.46    8.49   0
  10 -13  -3  145.34    8.55   0
   9 -13  -3   39.55    7.82   0
   8 -13  -3   76.93    7.43   0
   7 -13  -3  163.30   10.67   0
   6 -13  -3  195.29    8.08   0
   5 -13  -3  299.17    8.60   0
   4 -13  -3    8.02   10.15   0
   3 -13  -3   12.23    7.18   0
  -2  13   3    3.03   10.59   0
   2 -13  -3   12.32   10.45   0
  -1  13   3    9.96   11.07   0
   1 -13  -3    6.06    7.71   0
   0 -13  -3   10.71    8.16   0
   0  13   3   -9.02   11.56   0
  11 -14  -3   39.75    8.77   0
  11 -14  -3   44.34    8.81   0
  10 -14  -3   17.81    8.24   0
  10 -14  -3   13.30    8.32   0
   9 -14  -3   54.23   11.37   0
   8 -14  -3   46.34    8.05   0
   7 -14  -3  151.37    8.53   0
   6 -14  -3   70.87    7.84   0
  -6  14   3   82.61   12.08   0
   5 -14  -3  137.24    8.46   0
   4 -14  -3  101.66   11.23   0
   3 -14  -3  104.87    8.31   0
   2 -14  -3   83.24   11.92   0
  -2  14   3   99.01    8.63   0
   9 -15  -3   28.40    8.47   0
   8 -15  -3   16.53   11.91   0
   7 -15  -3   58.92    8.61   0
  -6  15   3   82.31   15.74   0
  -6  15   3   68.96   13.46   0
   6 -15  -3   76.18    8.82   0
   5 -15  -3   94.29    8.60   0
  -1  16  -4   12.04    8.97   0
   1 -16   4   19.69    8.73   0
   2 -16   4   98.91   12.20   0
   3 -16   4   98.65   12.11   0
  -3  16  -4   96.89    9.49   0
  -4  16  -4   73.90   12.96   0
   4 -16   4   76.64   12.10   0
   4 -16   4   73.46   11.68   0
  -5  16  -4   87.49   13.47   0
   5 -16   4   90.89    9.09   0
   5 -16   4   86.67   11.94   0
   6 -16   4    6.25   12.25   0
   6 -16   4   13.73   12.37   0
   7 -16   4    1.48   12.61   0
   7 -16   4    9.00    8.73   0
   1  15  -4   47.44    9.08   0
  -1 -15   4   43.50   11.90   0
   0 -15   4   27.86   11.33   0
   0  15  -4   32.21   11.75   0
  -1  15  -4   61.97   11.66   0
   1 -15   4   75.74   11.21   0
   2 -15   4   30.05    7.75   0
   3 -15   4   84.84   11.25   0
  -3  15  -4   93.44   11.73   0
  -4  15  -4   67.74   11.53   0
   4 -15   4   56.57   11.42   0
   4 -15   4   50.10    7.87   0
   5 -15   4  239.85   11.76   0
  -5  15  -4  242.63   13.76   0
   5 -15   4  220.06    9.32   0
   6 -15   4  155.20    8.98   0
   6 -15   4  169.89    8.99   0
   7 -15   4   67.61    8.51   0
   7 -15   4   81.51   11.94   0
   8 -15   4   10.92   11.91   0
   8 -15   4   30.04    8.27   0
   9 -15   4    7.26   12.35   0
   9 -15   4   16.25   12.29   0
  -3 -14   4   73.60   11.88   0
   3  14  -4   49.20    9.13   0
   2  14  -4   54.37   11.98   0
  -2 -14   4   48.31   11.72   0
  -1 -14   4  112.33    8.45   0
   1  14  -4  114.71    8.57   0
   0  14  -4   95.94   11.03   0
   0 -14   4   77.50    7.62   0
   1 -14   4    7.59    7.35   0
  -1  14  -4    2.08   10.63   0
   2 -14   4   11.34    7.13   0
  -3  14  -4  144.39   11.08   0
   3 -14   4  114.73    8.13   0
   4 -14   4   34.57    7.49   0
  -4  14  -4   45.15   10.91   0
   4 -14   4   43.06    7.27   0
  -5  14  -4   78.74   11.20   0
   5 -14   4   64.74   10.89   0
   5 -14   4   64.17    7.77   0
   6 -14   4  245.57   11.40   0
   6 -14   4  232.09   11.45   0
   7 -14   4  136.23    8.75   0
   7 -14   4  128.07    8.49   0
   8 -14   4  208.90    9.16   0
   8 -14   4  216.17   12.35   0
   9 -14   4   29.21    8.45   0
   9 -14   4   31.95   11.67   0
  10 -14   4   17.54   11.69   0
  10 -14   4    3.98    8.41   0
  -5 -13   4   64.34   12.43   0
  -4 -13   4   35.44   11.42   0
  -3 -13   4  144.64    8.51   0
  -2 -13   4  156.23   10.66   0
   2  13  -4  161.35   11.64   0
   1  13  -4   41.00   10.56   0
  -1 -13   4   31.36    7.10   0
   0 -13   4  172.85   10.36   0
   0  13  -4  165.00    8.23   0
  -1  13  -4   54.63    7.27   0
   1 -13   4   51.20    7.15   0
   2 -13   4  207.32   10.47   0
   3 -13   4   26.67    6.96   0
  -3  13  -4   36.03    7.22   0
  -4  13  -4   25.97    7.17   0
   4 -13   4   26.95    9.79   0
   4 -13   4   34.79   10.13   0
  -5  13  -4   22.86   10.19   0
   5 -13   4   30.19    9.96   0
   5 -13   4   22.26    9.94   0
   6 -13   4  202.42    8.47   0
   6 -13   4  228.93   10.96   0
   7 -13   4   55.53    7.48   0
   7 -13   4   41.51    7.55   0
   8 -13   4   74.36    8.07   0
   8 -13   4   96.91    7.90   0
   9 -13   4  148.73   11.48   0
  10 -13   4   89.84   11.84   0
  11 -13   4   99.98    9.15   0
   6  12  -4   62.03    9.16   0
  -6 -12   4   71.56   12.43   0
   5  12  -4    8.81    7.92   0
  -5 -12   4   14.78   11.01   0
  -4 -12   4   -0.75   10.34   0
   4  12  -4    5.17    7.68   0
  -3 -12   4    4.95    6.68   0
  -2 -12   4  228.99    7.86   0
   1  12  -4  227.30   10.87   0
  -1 -12   4  190.69    7.79   0
   0 -12   4  649.74    9.73   0
   0  12  -4  755.48   12.72   0
  -1  12  -4  318.77    8.73   0
   1 -12   4  265.48    8.01   0
   2 -12   4  248.76   10.28   0
  -3  12  -4  332.90   11.28   0
   3 -12   4  278.09    8.51   0
   3 -12   4  270.30    8.02   0
   4 -12   4   57.57    9.57   0
  -4  12  -4   60.71   10.25   0
   4 -12   4   56.13    7.12   0
   5 -12   4   77.53    9.92   0
  -5  12  -4   79.84   10.32   0
   5 -12   4   76.15    9.95   0
   6 -12   4  135.38   10.21   0
   6 -12   4  138.51   10.28   0
   7 -12   4  302.56   10.91   0
   8 -12   4  128.22   10.51   0
   9 -12   4  197.32    8.43   0
  10 -12   4   52.37    8.15   0
  11 -12   4  203.67    9.36   0
   7  11  -4  100.61   12.49   0
  -7 -11   4  108.04   12.15   0
   6  11  -4  136.01   11.67   0
  -6 -11   4  126.91    8.17   0
  -5 -11   4   55.47    7.68   0
   5  11  -4   65.07   10.69   0
  -4 -11   4    3.47    9.45   0
   4  11  -4    9.16    9.99   0
   3  11  -4   52.71    7.08   0
  -3 -11   4   60.79    9.40   0
  -2 -11   4    5.47    8.97   0
  -1 -11   4   30.49    6.42   0
   1  11  -4   39.30    6.80   0
   0 -11   4  214.05    9.74   0
   0  11  -4  233.72    8.01   0
  -1  11  -4  908.31   13.01   0
   1 -11   4  744.10   10.08   0
   2 -11   4  198.65    9.78   0
  -3  11  -4  305.18   11.13   0
   3 -11   4  260.24    8.07   0
   3 -11   4  265.09   10.07   0
   4 -11   4   91.02    8.94   0
  -4  11  -4   90.89    9.79   0
   4 -11   4   64.08    9.47   0
   5 -11   4  135.98    9.70   0
   5 -11   4  117.55    7.23   0
   6 -11   4  182.05    7.63   0
   7 -11   4    0.61    6.78   0
   8 -11   4    9.27    6.88   0
   9 -11   4  141.76    7.98   0
  10 -11   4  116.33   10.73   0
  11 -11   4   96.55   15.90   0
  11 -11   4   93.86    8.51   0
  12 -11   4  125.37   17.40   0
  12 -11   4  138.59   12.57   0
   8  10  -4    4.99    8.30   0
  -8 -10   4    6.27   11.18   0
   7  10  -4   56.34   10.89   0
  -7 -10   4   44.79   10.64   0
   6  10  -4   50.42    7.47   0
  -6 -10   4   55.90    7.40   0
  -5 -10   4  342.24    8.76   0
   5  10  -4  393.10   11.43   0
   4  10  -4  194.12   10.41   0
  -4 -10   4  209.03   10.12   0
  -3 -10   4   61.21    6.64   0
   3  10  -4   67.38    6.92   0
  -2 -10   4   60.22    6.54   0
   1  10  -4   90.09    7.01   0
  -1 -10   4   79.80    6.63   0
   0 -10   4  147.78    9.35   0
   0  10  -4  169.71    9.57   0
  -1  10  -4   22.55    6.26   0
   1 -10   4   16.80    6.21   0
   2 -10   4  140.43    9.44   0
  -3  10  -4  719.84   12.87   0
   3 -10   4  607.67    9.52   0
   3 -10   4  651.65   12.00   0
  -4  10  -4 1136.95   15.30   0
   4 -10   4  893.77   10.91   0
   4 -10   4  989.94   13.11   0
   5 -10   4  218.58    7.39   0
   6 -10   4  349.14    8.02   0
   7 -10   4  216.33    7.51   0
   8 -10   4  316.79    8.57   0
   8 -10   4  334.33   12.87   0
   9 -10   4   54.70    7.16   0
   9 -10   4   64.62   10.72   0
  10 -10   4   47.60   11.12   0
  10 -10   4   41.72   10.45   0
  11 -10   4   38.35   14.48   0
  11 -10   4   47.81    7.76   0
  12 -10   4  108.44   13.92   0
  12 -10   4  106.96    8.78   0
   9   9  -4   14.16   12.11   0
  -9  -9   4   19.82    8.48   0
  -8  -9   4    2.57    7.34   0
   8   9  -4    8.02   10.81   0
  -7  -9   4  118.61    7.85   0
   7   9  -4  127.19   10.56   0
   6   9  -4   27.98    6.68   0
  -6  -9   4   26.65    9.52   0
  -5  -9   4  200.26   10.05   0
   5   9  -4  198.13   10.22   0
   4   9  -4  453.77   11.41   0
  -4  -9   4  450.06   10.83   0
  -3  -9   4  417.57   10.56   0
   3   9  -4  414.90   11.10   0
  -2  -9   4  567.65   11.05   0
   1   9  -4   25.72    6.36   0
  -1  -9   4   23.76    8.31   0
   0  -9   4   29.83    5.86   0
   0   9  -4   30.85    6.20   0
   1  -9   4    9.40    5.96   0
  -1   9  -4    8.76    6.02   0
   2  -9   4   26.56    6.11   0
   2  -9   4   32.41    6.26   0
  -3   9  -4   50.89    9.23   0
   3  -9   4   42.09    6.38   0
   3  -9   4   41.21    8.99   0
  -4   9  -4  686.06   13.09   0
   4  -9   4  624.27   11.54   0
   5  -9   4  292.17    8.12   0
   6  -9   4  641.57   14.11   0
   6  -9   4  611.46   11.10   0
   7  -9   4  477.72   10.58   0
   7  -9   4  522.31   13.22   0
   8  -9   4   79.38    9.54   0
   8  -9   4   82.38   10.23   0
   9  -9   4  100.76   10.74   0
   9  -9   4   98.05    7.04   0
  10  -9   4   10.22   10.58   0
  10  -9   4   15.95    9.72   0
  11  -9   4   28.94   11.57   0
  11  -9   4   28.64    7.33   0
  12  -9   4    2.48   11.97   0
  12  -9   4   -4.56    8.17   0
  10   8  -4   70.74    8.84   0
 -10  -8   4   56.76    9.10   0
   9   8  -4   23.81   10.62   0
  -9  -8   4   25.53   10.69   0
   8   8  -4  151.58   10.47   0
  -8  -8   4  124.77    7.88   0
  -7  -8   4    4.48    6.56   0
   7   8  -4    6.81    6.45   0
  -6  -8   4  124.60    9.82   0
   6   8  -4  118.91    9.47   0
  -5  -8   4  171.52    7.22   0
   5   8  -4  190.98    9.76   0
   4   8  -4  447.21   10.73   0
  -4  -8   4  440.87   10.58   0
   3   8  -4   69.87    8.92   0
  -3  -8   4   62.93    8.43   0
   2   8  -4  742.73   12.54   0
  -2  -8   4  726.77   12.02   0
   1   8  -4  944.02   12.47   0
  -1  -8   4  704.86   10.47   0
   0   8  -4  977.38   11.21   0
   0  -8   4  793.54   10.64   0
   1  -8   4  530.84    9.11   0
  -1   8  -4  656.05    9.77   0
   2  -8   4  111.21    9.08   0
   2  -8   4  108.32    6.61   0
   3  -8   4   64.02    9.23   0
   4  -8   4    9.67    8.75   0
   4  -8   4   17.18    9.31   0
   5  -8   4   80.55    6.44   0
   5  -8   4  103.60    9.60   0
   6  -8   4   67.77    6.30   0
   6  -8   4   72.36    9.62   0
   7  -8   4  984.34   15.15   0
   7  -8   4  873.66   10.32   0
   8  -8   4  284.55   11.63   0
   8  -8   4  234.75    7.34   0
   9  -8   4  317.05   12.61   0
   9  -8   4  295.05   10.79   0
  10  -8   4   74.32   10.98   0
  10  -8   4   67.28    7.49   0
  11  -8   4   17.51    7.06   0
  11  -8   4   26.41    7.91   0
  12  -8   4   69.81   11.90   0
  12  -8   4   72.74   12.41   0
 -10  -7   4   89.54    8.33   0
  10   7  -4   86.16    8.38   0
   9   7  -4   38.81   10.31   0
  -9  -7   4   34.16   10.20   0
   8   7  -4  116.38    9.77   0
  -8  -7   4  115.18    9.96   0
  -7  -7   4  622.05   12.14   0
   7   7  -4  615.53   12.10   0
  -6  -7   4  131.94    7.11   0
   6   7  -4  153.46    9.58   0
  -5  -7   4   41.11    8.53   0
   5   7  -4   42.02    8.72   0
   4   7  -4  359.92   10.35   0
  -4  -7   4  258.02    7.79   0
  -3  -7   4  171.19    9.18   0
   3   7  -4  158.60    7.35   0
   2   7  -4  110.21    9.14   0
  -2  -7   4  108.35    8.53   0
  -1  -7   4  477.69   10.90   0
   1   7  -4  515.10    9.04   0
   0   7  -4  425.10    8.82   0
   0  -7   4  379.09   10.40   0
   1  -7   4 1627.05   14.64   0
  -1   7  -4 1943.45   15.23   0
   2  -7   4  512.08   11.01   0
   3  -7   4  252.05    7.87   0
   3  -7   4  295.28   10.55   0
   4  -7   4   33.75    6.22   0
   4  -7   4   38.53    8.94   0
   5  -7   4   45.75    8.43   0
   5  -7   4   40.44    9.52   0
   6  -7   4    1.05    6.55   0
   6  -7   4   10.74    8.31   0
   7  -7   4  199.72   10.70   0
   7  -7   4  167.55    7.02   0
   8  -7   4  166.99   10.78   0
  -8   7  -4  149.77    7.01   0
   8  -7   4  160.18    9.30   0
   9  -7   4  320.97   12.23   0
  -9   7  -4  317.63   10.46   0
   9  -7   4  297.34    7.90   0
  10  -7   4  423.19   11.08   0
  10  -7   4  451.24   13.12   0
 -10   7  -4  442.91    8.55   0
  11  -7   4   52.66   10.41   0
 -11   7  -4   61.07    7.48   0
  11  -7   4   43.58    8.17   0
  12  -7   4   65.45    8.53   0
  12  -7   4   82.82   12.51   0
 -11  -6   4   64.79   11.93   0
  11   6  -4   54.66   11.61   0
  10   6  -4  181.30   11.22   0
 -10  -6   4  159.17    8.31   0
   9   6  -4  339.12   11.09   0
  -9  -6   4  327.33   11.16   0
   8   6  -4  152.44    9.74   0
  -8  -6   4  134.20    7.24   0
   7   6  -4  379.38    8.57   0
  -7  -6   4  395.95   10.86   0
  -6  -6   4   89.47    8.75   0
   6   6  -4   98.56    8.76   0
  -5  -6   4  102.06    8.64   0
   5   6  -4   96.55    8.66   0
  -4  -6   4  302.38   10.07   0
   4   6  -4  285.72   10.14   0
   3   6  -4    2.26    8.22   0
  -3  -6   4    0.55    8.01   0
   2   6  -4   37.30    6.17   0
  -2  -6   4   38.70    7.87   0
   1   6  -4 1023.27   12.65   0
  -1  -6   4  791.42   12.21   0
   0   6  -4 1010.13   11.45   0
   0  -6   4  963.77   14.34   0
  -1   6  -4 1144.49   12.29   0
  -2   6  -4 1127.80   14.23   0
   2  -6   4 1084.57   14.42   0
   2  -6   4  996.76   13.17   0
   3  -6   4 1067.49   14.62   0
   3  -6   4  973.16   12.64   0
   4  -6   4 1543.10   12.70   0
   4  -6   4 1730.24   17.29   0
   5  -6   4  325.52    8.98   0
  -5   6  -4  335.69    9.59   0
   5  -6   4  322.20    7.58   0
   6  -6   4   61.20    9.75   0
  -6   6  -4   54.26    6.09   0
   6  -6   4   47.56    6.28   0
   7  -6   4   81.57    7.77   0
  -7   6  -4  101.13    8.70   0
   7  -6   4  102.84    8.87   0
   8  -6   4   92.20    7.51   0
   8  -6   4  131.62   10.71   0
  -8   6  -4  128.53    9.67   0
   9  -6   4   11.30    6.28   0
   9  -6   4    8.30    7.39   0
  -9   6  -4    2.13    8.97   0
  10  -6   4  232.77    7.81   0
 -10   6  -4  259.60    7.83   0
  11  -6   4  160.85    7.97   0
 -11   6  -4  185.98   10.61   0
  12  -6   4  302.96    9.70   0
 -12   6  -4  283.37    9.43   0
 -12  -5   4   18.48   12.31   0
  12   5  -4    7.20    8.26   0
 -11  -5   4    4.07    7.69   0
  11   5  -4   -2.50   10.37   0
 -10  -5   4   33.69   10.05   0
  10   5  -4   32.29    7.17   0
  -9  -5   4  177.67    7.51   0
   9   5  -4  180.19   10.03   0
  -8  -5   4  153.98    9.58   0
   8   5  -4  135.61    9.53   0
  -7  -5   4  790.73   12.54   0
   7   5  -4  799.68   12.39   0
   6   5  -4  619.88    9.93   0
  -6  -5   4  712.10   12.14   0
   5   5  -4   79.05    6.62   0
  -5  -5   4   94.84    8.46   0
  -4  -5   4  809.42   13.89   0
   4   5  -4  845.23   14.12   0
   3   5  -4  348.64   11.25   0
  -3  -5   4  327.79   10.73   0
  -2  -5   4  343.85   11.37   0
   2   5  -4  409.98   10.34   0
  -1  -5   4   24.90    8.23   0
   1   5  -4   38.71    6.36   0
   0  -5   4 1642.91   18.51   0
   0   5  -4 1988.56   16.61   0
   1  -5   4  409.71    9.14   0
  -1   5  -4  405.27    8.83   0
  -2   5  -4 2115.06   16.79   0
   2  -5   4 2067.26   17.06   0
   2  -5   4 1961.56   15.67   0
   3  -5   4  242.52   10.32   0
  -3   5  -4  210.31    6.94   0
   3  -5   4  220.98    8.87   0
  -4   5  -4  392.74   10.02   0
   4  -5   4  417.99   11.58   0
   4  -5   4  382.83    9.81   0
  -5   5  -4 1041.05   12.00   0
   5  -5   4 1040.50   14.30   0
   5  -5   4 1000.26   10.16   0
   6  -5   4  249.94    8.49   0
  -6   5  -4  306.61    7.31   0
   6  -5   4  308.70    9.56   0
  -7   5  -4  324.50    9.65   0
   7  -5   4  299.83    7.57   0
   8  -5   4    6.83    6.30   0
  -8   5  -4   19.64    6.08   0
   9  -5   4    6.74    6.45   0
  -9   5  -4   12.60    9.07   0
  10  -5   4   30.10    6.65   0
 -10   5  -4   22.70    6.72   0
  11  -5   4   35.20    7.68   0
 -11   5  -4   42.70    7.57   0
  12  -5   4   52.49    8.30   0
 -12   5  -4   43.03    8.39   0
  12   4  -4  167.82   11.88   0
 -12  -4   4  151.13    8.94   0
 -11  -4   4   16.21   10.06   0
  11   4  -4   12.57   10.05   0
 -10  -4   4   13.31    9.69   0
  10   4  -4    5.29    6.62   0
   9   4  -4   -3.50    8.85   0
  -9  -4   4   -0.80    9.16   0
  -8  -4   4   40.92    8.56   0
   8   4  -4   52.11    9.10   0
  -7  -4   4    0.07    6.00   0
   7   4  -4    4.92    8.26   0
   6   4  -4  669.79   10.46   0
  -6  -4   4  734.50   12.42   0
  -5  -4   4  947.71   14.77   0
   5   4  -4  961.51   14.55   0
  -4  -4   4 1759.15   20.15   0
   4   4  -4 1673.26   19.54   0
   3   4  -4  758.19   16.68   0
  -3  -4   4  750.62   16.32   0
   2   4  -4  252.46    9.62   0
  -2  -4   4  197.38   12.77   0
  -1  -4   4 1088.30   19.43   0
   1   4  -4 1271.27   13.13   0
  -1  -4   4 1127.54   20.41   0
   0   4  -4  137.71    7.17   0
   0  -4   4  127.25    9.30   0
   0  -4   4  135.29    7.33   0
   1  -4   4  370.06   10.89   0
  -1   4  -4  358.34    8.83   0
  -1   4  -4  337.69   11.03   0
   2  -4   4  649.29   12.50   0
  -2   4  -4  556.10    9.61   0
   2  -4   4  570.06    9.59   0
   3  -4   4  784.17   13.11   0
  -3   4  -4  700.57    9.74   0
   3  -4   4  743.59   11.20   0
   4  -4   4  154.48    7.94   0
  -4   4  -4  158.68    8.65   0
   4  -4   4  167.56    8.67   0
   5  -4   4 1064.79   11.80   0
  -5   4  -4 1089.53   11.86   0
   6  -4   4  435.76    9.89   0
  -6   4  -4  462.21    9.92   0
   7  -4   4 1226.05   12.22   0
  -7   4  -4 1161.27   10.34   0
   8  -4   4  684.01    8.94   0
  -8   4  -4  733.69   10.79   0
   9  -4   4  168.78    7.06   0
  -9   4  -4  181.83    9.43   0
  10  -4   4   53.58    6.85   0
 -10   4  -4   57.85    9.59   0
  11  -4   4   17.52   10.61   0
 -11   4  -4   12.40   10.29   0
 -12   4  -4    8.65    8.00   0
  12  -4   4   15.91   11.53   0
 -13  -3   4    4.13    8.55   0
  13   3  -4    6.52   11.59   0
  12   3  -4  160.30    8.37   0
 -12  -3   4  166.95   11.72   0
  11   3  -4  260.20   10.94   0
 -11  -3   4  263.75   11.30   0
 -10  -3   4  264.96    8.25   0
  10   3  -4  278.12   10.39   0
  -9  -3   4  188.52    9.81   0
   9   3  -4  199.45    9.65   0
  -8  -3   4   74.92    6.60   0
   8   3  -4   53.28    6.42   0
  -7  -3   4   97.21    9.20   0
   7   3  -4   91.48    6.58   0
   6   3  -4   38.27    8.37   0
  -6  -3   4   39.06    8.09   0
   5   3  -4   11.51    7.55   0
  -5  -3   4   13.37    7.72   0
   4   3  -4  756.79   16.86   0
  -4  -3   4  727.13   15.83   0
   3   3  -4 2738.19   17.54   0
   3   3  -4 2125.87   38.18   0
  -3  -3   4 2277.66   40.67   0
   2   3  -4 1303.78   13.26   0
  -1  -3   4 1585.87   25.57   0
   1   3  -4 1795.94   16.98   0
  -1  -3   4 1746.05   15.62   0
   0   3  -4  207.48   10.34   0
   0  -3   4  231.48   10.49   0
   0   3  -4  220.86    8.35   0
   1  -3   4  638.30   10.67   0
   1  -3   4  742.75   13.34   0
  -1   3  -4  650.18   10.93   0
  -1   3  -4  755.19   13.04   0
   2  -3   4 1058.74   13.05   0
  -2   3  -4 1032.21   12.99   0
   2  -3   4  971.41   11.37   0
   3  -3   4   20.13    8.40   0
   3  -3   4   15.52    6.59   0
  -3   3  -4   14.50    5.50   0
   4  -3   4   11.21    5.52   0
  -4   3  -4    7.95    5.55   0
  -5   3  -4 1407.62   12.73   0
   5  -3   4 1379.88   11.24   0
   6  -3   4  776.27   10.90   0
  -6   3  -4  805.77   10.90   0
  -7   3  -4  297.63    9.16   0
   7  -3   4  286.71    7.28   0
  -8   3  -4  402.96    9.56   0
   8  -3   4  375.61    7.38   0
   9  -3   4   77.77    6.79   0
  -9   3  -4   80.54    6.54   0
  10  -3   4  330.81    8.48   0
 -10   3  -4  368.07    8.39   0
  11  -3   4   81.64   10.65   0
 -11   3  -4   81.51   10.86   0
 -12   3  -4   -2.59    8.34   0
  12  -3   4    9.11    7.91   0
  13   2  -4   19.40    8.15   0
 -13  -2   4   36.35   11.49   0
 -12  -2   4   44.64   10.60   0
  12   2  -4   40.24   10.33   0
 -11  -2   4  180.25    8.15   0
  11   2  -4  192.51   10.36   0
  10   2  -4  104.49    6.85   0
 -10  -2   4  107.34    9.51   0
   9   2  -4  642.63   11.51   0
  -9  -2   4  619.75   11.73   0
  -8  -2   4   79.31    6.71   0
   8   2  -4   83.78    6.46   0
  -7  -2   4    8.47    8.14   0
   7   2  -4   15.33    8.01   0
   6   2  -4   78.25    8.20   0
  -6  -2   4   70.15    6.41   0
  -5  -2   4  247.29   10.79   0
   5   2  -4  260.31   10.17   0
   4   2  -4  198.43    9.47   0
  -4  -2   4  166.30   12.95   0
   4   2  -4  142.09    9.91   0
   3   2  -4  893.71   32.22   0
   3   2  -4 1225.70   13.00   0
  -2  -2   4 1433.78   14.54   0
   2   2  -4 1401.62   14.27   0
   1   2  -4 1830.31   17.80   0
  -1  -2   4 1548.97   22.36   0
  -1  -2   4 1803.15   16.41   0
   1   2  -4 1620.19   24.00   0
   0  -2   4 1625.07   15.93   0
   0   2  -4 1646.75   15.84   0
   0   2  -4 1550.91   18.02   0
   1  -2   4  857.40   11.58   0
   1  -2   4  995.14   15.01   0
  -1   2  -4  841.27   11.56   0
  -2   2  -4  882.03   11.85   0
   2  -2   4  821.41   10.23   0
   3  -2   4  392.80    9.88   0
  -3   2  -4  389.94    9.65   0
  -4   2  -4  135.76    6.29   0
   4  -2   4  129.06    6.32   0
   5  -2   4    4.29    5.43   0
  -5   2  -4    0.74    7.78   0
  -6   2  -4  204.91    6.67   0
   6  -2   4  198.79    6.81   0
   7  -2   4   38.44    6.02   0
  -7   2  -4   45.23    8.27   0
   8  -2   4  605.90    8.69   0
  -8   2  -4  612.64    8.64   0
   9  -2   4  136.40    9.62   0
  -9   2  -4  129.16    9.48   0
  10  -2   4   53.76    7.48   0
 -10   2  -4   57.41    7.56   0
  11  -2   4  122.10   10.99   0
 -11   2  -4  107.48   11.07   0
  12  -2   4   35.22    8.95   0
 -12   2  -4   35.24   12.35   0
 -14  -1   4   23.81    8.64   0
  14   1  -4   20.05    8.59   0
 -13  -1   4    3.34   10.83   0
  13   1  -4    3.25   10.62   0
 -12  -1   4   12.64   10.34   0
  12   1  -4   16.64    9.83   0
 -11  -1   4  387.94   11.23   0
  11   1  -4  382.69   10.94   0
  10   1  -4   99.77    9.29   0
 -10  -1   4  101.62    9.53   0
   9   1  -4  141.86    7.06   0
  -9  -1   4  136.18    9.66   0
   8   1  -4  888.24   12.44   0
  -8  -1   4  841.00   12.73   0
   7   1  -4  613.81    9.76   0
  -7  -1   4  595.67   10.19   0
   6   1  -4 1378.45   15.68   0
  -6  -1   4 1316.36   16.43   0
   5   1  -4  234.60   10.23   0
   4   1  -4  134.62    9.29   0
   4   1  -4   78.69    8.96   0
  -3  -1   4   11.77    9.07   0
   3   1  -4   10.44    7.97   0
   3   1  -4   16.26    6.47   0
   2   1  -4   93.83    7.71   0
  -2  -1   4   90.06    7.55   0
  -2  -1   4   76.05    9.43   0
   2   1  -4   70.97    9.12   0
  -1  -1   4  417.73   10.23   0
   1   1  -4  343.41   10.04   0
   1   1  -4  412.72   12.77   0
   0  -1   4 1296.22   14.39   0
   0  -1   4 1581.30   17.20   0
   0   1  -4 1477.36   16.31   0
   1  -1   4 2147.87   16.97   0
  -1   1  -4 1922.73   16.33   0
  -2   1  -4 2531.84   15.70   0
   2  -1   4 2842.59   17.47   0
   3  -1   4  338.04    7.51   0
  -3   1  -4  320.76    7.26   0
   4  -1   4   45.94    5.53   0
  -4   1  -4   41.93    7.96   0
   5  -1   4  123.55    6.26   0
  -5   1  -4  135.18    8.42   0
   6  -1   4  110.18    6.35   0
  -6   1  -4  115.70    8.39   0
   7  -1   4  233.61    9.31   0
  -7   1  -4  237.98    8.95   0
  -8   1  -4   34.39    8.67   0
   8  -1   4   33.90    8.78   0
   9  -1   4  246.82    7.85   0
  -9   1  -4  249.05    7.58   0
  10  -1   4   94.41    7.72   0
 -10   1  -4   84.59    7.46   0
  11  -1   4  171.83   11.82   0
 -11   1  -4  170.11    8.47   0
  14   0  -4  108.87   11.99   0
  13   0  -4   69.08   10.58   0
 -12   0   4  145.33   10.24   0
  12   0  -4  139.16    7.61   0
 -11   0   4   75.90    7.11   0
  11   0  -4   73.86    9.71   0
  10   0  -4  418.07   10.81   0
 -10   0   4  421.79    8.61   0
   9   0  -4  233.21    9.71   0
  -9   0   4  225.50    7.90   0
  -8   0   4  895.94   11.32   0
   8   0  -4  950.62   12.59   0
   7   0  -4  473.55    9.04   0
   6   0  -4 2139.96   18.71   0
   5   0  -4 2601.01   21.63   0
   5   0  -4 2898.78   19.21   0
   4   0  -4 1879.33   16.47   0
   4   0  -4 1591.31   18.28   0
   3   0  -4  345.97   11.36   0
  -3   0   4  403.84   11.73   0
   3   0  -4  369.33    9.48   0
  -2   0   4 1105.34   15.68   0
   2   0  -4 1013.84   13.71   0
   2   0  -4  874.87   13.72   0
  -1   0   4   27.56    6.10   0
  -1   0   4   24.72    7.40   0
   1   0  -4   32.46    6.17   0
   0   0  -4  406.85    8.86   0
   0   0   4  372.79    8.58   0
  -1   0  -4 1011.27   12.54   0
   1   0   4  794.01   10.14   0
  -2   0  -4  358.74    9.37   0
   2   0   4  357.50    9.37   0
   3   0   4 2783.70   15.26   0
  -3   0  -4 2802.53   15.20   0
  -4   0  -4  790.38    8.93   0
   4   0   4  830.17   10.67   0
  -5   0  -4  705.68   10.38   0
   5   0   4  709.29   10.54   0
   6   0   4  132.12    6.32   0
  -6   0  -4  153.70    6.40   0
   7   0   4   30.35    8.28   0
  -7   0  -4   17.42    5.94   0
   8   0   4   26.34    6.20   0
  -8   0  -4   21.44    6.13   0
   9   0   4   10.29    6.63   0
  -9   0  -4   13.37    9.37   0
  10   0   4    3.37    7.49   0
 -10   0  -4   -0.62   10.38   0
  11   0   4  120.62   11.98   0
 -11   0  -4  116.52   12.15   0
  14  -1  -4   85.09    8.67   0
  13  -1  -4  105.66    8.00   0
  12  -1  -4  205.56   10.76   0
  11  -1  -4  217.34    9.98   0
  10  -1  -4    1.45    6.01   0
   9  -1  -4   32.48    8.63   0
   8  -1  -4  301.13   10.13   0
   7  -1  -4  353.62    8.44   0
   7  -1  -4  329.25    8.37   0
   6  -1  -4  484.48    9.56   0
   6  -1  -4  507.38   11.04   0
   5  -1  -4 1093.66   15.22   0
   5  -1  -4 1226.24   15.33   0
  -4   1   4  118.54    7.34   0
   4  -1  -4  109.79    7.19   0
   4  -1  -4  118.43    8.81   0
   3  -1  -4 2119.71   19.90   0
  -3   1   4 2198.54   18.76   0
   3  -1  -4 2030.42   18.68   0
   2  -1  -4  564.52   11.88   0
  -2   1   4  596.88   11.29   0
  -2   1   4  554.83   11.66   0
  -1   1   4  756.13   10.70   0
   1  -1  -4  814.54   12.46   0
   0  -1  -4   97.76    6.30   0
   0   1   4   97.10    6.18   0
  -1  -1  -4 1564.06   12.56   0
   1   1   4 1547.28   12.46   0
  -2  -1  -4   31.90    7.71   0
   2   1   4   27.07    7.90   0
   3   1   4  207.38    6.63   0
  -3  -1  -4  232.86    8.71   0
   4   1   4  196.40    6.46   0
  -4  -1  -4  200.44    6.50   0
  -5  -1  -4  229.39    6.65   0
   5   1   4  209.55    8.79   0
   6   1   4 1249.24   11.71   0
  -6  -1  -4 1247.52   11.59   0
   7   1   4   94.02    6.49   0
  -7  -1  -4   99.56    6.50   0
   8   1   4  123.57    9.75   0
  -8  -1  -4  114.31    9.55   0
   9   1   4    4.17    7.00   0
  -9  -1  -4   13.48    6.80   0
  10   1   4    6.02    7.83   0
 -10  -1  -4   -6.79    7.52   0
  15  -2  -4   31.57   12.53   0
  14  -2  -4  113.50    8.52   0
  13  -2  -4  376.76    9.29   0
  12  -2  -4  220.50    7.84   0
  11  -2  -4  125.60    9.79   0
  10  -2  -4   79.66    6.87   0
   9  -2  -4  383.40    8.35   0
   8  -2  -4  624.19   10.26   0
   8  -2  -4  591.01    9.54   0
   7  -2  -4   51.41    6.50   0
   7  -2  -4   59.11    6.50   0
   6  -2  -4  187.21    7.28   0
   6  -2  -4  220.53   10.02   0
   5  -2  -4 1920.39   19.69   0
   5  -2  -4 1840.83   16.38   0
  -4   2   4 1538.89   17.61   0
   4  -2  -4 1265.98   13.14   0
   4  -2  -4 1242.89   15.59   0
   3  -2  -4  574.21    9.78   0
  -3   2   4  648.02   11.59   0
  -3   2   4  682.46   13.25   0
  -2   2   4 2544.44   17.93   0
   2  -2  -4 2501.11   17.97   0
  -2   2   4 2804.46   21.72   0
  -1   2   4 2670.99   16.63   0
   1  -2  -4 2649.41   16.65   0
   0  -2  -4 3170.21   17.17   0
   0   2   4 3182.03   17.05   0
  -1  -2  -4   84.00    5.99   0
   1   2   4   76.81    5.91   0
  -2  -2  -4    1.08    5.37   0
   2   2   4    5.35    5.41   0
   3   2   4  218.03    6.78   0
  -3  -2  -4  218.46    6.71   0
  -4  -2  -4  241.23    8.69   0
   4   2   4  224.36    6.66   0
   5   2   4   39.39    5.93   0
  -5  -2  -4   32.98    8.20   0
  -6  -2  -4  961.98   11.20   0
   6   2   4  896.94    9.39   0
  -7  -2  -4  532.55   10.72   0
   7   2   4  498.60   11.10   0
   8   2   4  441.89    8.53   0
  -8  -2  -4  452.89    8.49   0
  -9  -2  -4  162.69   10.97   0
   9   2   4  154.02   10.97   0
  10   2   4    5.17    8.29   0
 -10  -2  -4   15.13    8.04   0
  15  -3  -4   22.60    8.58   0
  14  -3  -4    6.92    7.94   0
  13  -3  -4  143.54    8.25   0
  12  -3  -4  158.09    7.80   0
  11  -3  -4  474.04    8.88   0
  10  -3  -4  548.79    9.04   0
  10  -3  -4  616.09   12.54   0
   9  -3  -4  206.99    7.41   0
   9  -3  -4  236.39    8.09   0
   8  -3  -4  585.31   11.57   0
   8  -3  -4  574.22   10.83   0
   7  -3  -4  104.04    7.22   0
   7  -3  -4  104.39    8.78   0
   6  -3  -4  280.85   11.21   0
   6  -3  -4  254.26    9.04   0
  -5   3   4  127.29    9.39   0
   5  -3  -4  106.42    7.93   0
   5  -3  -4  113.09    8.42   0
  -4   3   4 1628.13   17.50   0
   4  -3  -4 1525.03   13.24   0
  -3   3   4  969.06   12.08   0
  -3   3   4  876.89   13.14   0
   3  -3  -4  880.95   10.51   0
  -2   3   4 1658.30   14.11   0
   2  -3  -4 1269.34   11.76   0
  -1   3   4  487.42    9.87   0
   1  -3  -4  446.85    8.21   0
   0  -3  -4  483.69   10.03   0
   0   3   4  483.21    9.98   0
   1   3   4  834.52   10.80   0
  -1  -3  -4  802.33    9.19   0
  -2  -3  -4  783.54   10.27   0
   2   3   4  714.13    8.52   0
  -3  -3  -4  402.14    7.40   0
   3   3   4  335.97    7.09   0
  -4  -3  -4    2.89    7.76   0
   4   3   4    5.20    7.92   0
   5   3   4   -3.54    5.82   0
  -5  -3  -4   10.62    5.69   0
  -6  -3  -4   49.83    6.38   0
   6   3   4   56.36    9.01   0
   7   3   4  166.48    9.86   0
  -7  -3  -4  143.44    7.14   0
   8   3   4   85.11    7.54   0
  -8  -3  -4   83.28   10.11   0
   9   3   4  270.76   11.96   0
  -9  -3  -4  240.64    8.73   0
  15  -4  -4    9.47   11.98   0
  15  -4  -4   11.62    8.46   0
  14  -4  -4   12.36   10.87   0
  14  -4  -4   18.18   11.22   0
  13  -4  -4   -1.97   10.06   0
  13  -4  -4   -1.23   10.13   0
  12  -4  -4   16.48    9.58   0
  12  -4  -4    7.27    6.65   0
  11  -4  -4   -2.16    9.40   0
  11  -4  -4   -2.21    6.37   0
  10  -4  -4  890.51   13.00   0
  10  -4  -4  893.65   10.60   0
   9  -4  -4  621.50   11.78   0
   9  -4  -4  643.00   11.46   0
   8  -4  -4 1214.40   17.37   0
   8  -4  -4 1109.77   11.54   0
   7  -4  -4  163.91   10.78   0
   7  -4  -4  158.90    6.89   0
   6  -4  -4   98.38   10.32   0
   6  -4  -4   92.90    8.40   0
   5  -4  -4  337.35    7.65   0
  -5   4   4  393.92   12.12   0
  -4   4   4    5.73    8.55   0
  -4   4   4    7.71    7.82   0
   4  -4  -4    9.71    8.03   0
  -3   4   4   30.95    5.92   0
   3  -4  -4   61.55    8.26   0
   2  -4  -4  131.26    6.68   0
  -2   4   4  139.02    8.67   0
  -1   4   4  946.88    9.92   0
   1  -4  -4  998.66   11.67   0
   0   4   4  319.87    9.07   0
   0  -4  -4  324.27    8.98   0
   1   4   4 1304.77   10.60   0
  -1  -4  -4 1413.89   12.13   0
   2   4   4  540.50    8.06   0
  -2  -4  -4  446.17    7.54   0
  -3  -4  -4  624.22    9.97   0
   3   4   4  617.68    9.94   0
   4   4   4  556.36    7.90   0
  -4  -4  -4  515.30    7.73   0
  -5  -4  -4  107.88    8.65   0
   5   4   4   98.28    8.72   0
  -6  -4  -4   34.55    6.58   0
   6   4   4   34.32    6.57   0
  -7  -4  -4  107.41    7.04   0
   7   4   4  117.49    7.37   0
   8   4   4   27.38    7.32   0
  -8  -4  -4   17.53    7.32   0
  -9  -4  -4   12.15   11.47   0
   9   4   4   11.49   11.61   0
  15  -5  -4  106.18   12.40   0
  15  -5  -4  107.27   13.09   0
  14  -5  -4  116.96   11.40   0
  14  -5  -4  128.04   11.79   0
  13  -5  -4   47.16   10.61   0
  13  -5  -4   38.99    7.18   0
  12  -5  -4   30.60    9.89   0
  12  -5  -4   33.59    9.63   0
  11  -5  -4   16.65   11.62   0
  11  -5  -4   13.71    9.02   0
  10  -5  -4   49.25    9.78   0
  10  -5  -4   55.76    6.65   0
   9  -5  -4  152.57   11.01   0
   9  -5  -4  150.27    9.72   0
   8  -5  -4  687.02    9.56   0
   8  -5  -4  724.41   16.53   0
   8  -5  -4  715.06   11.60   0
   7  -5  -4 1166.77   12.57   0
   6  -5  -4  454.48    8.26   0
  -6   5   4  509.58   13.72   0
   5  -5  -4  897.77   10.02   0
  -5   5   4 1021.95   16.40   0
  -4   5   4   34.22    8.94   0
   4  -5  -4   32.33    5.57   0
  -4   5   4   34.05    8.01   0
  -3   5   4  625.29   10.38   0
   3  -5  -4  568.79    8.49   0
   2  -5  -4  601.84    8.48   0
  -2   5   4  566.34    8.45   0
  -1   5   4  158.80    6.39   0
   1  -5  -4  161.04    6.45   0
   0  -5  -4    8.54    5.63   0
   0   5   4    1.94    5.51   0
  -1  -5  -4 1073.87    9.86   0
   1   5   4 1013.29    9.68   0
  -2  -5  -4  316.80    9.05   0
   2   5   4  310.44    8.99   0
  -3  -5  -4   83.22    8.06   0
   3   5   4   79.53    8.40   0
  -4  -5  -4  244.86    6.70   0
   4   5   4  284.49    9.20   0
   5   5   4   67.93    9.09   0
  -5  -5  -4   68.69    6.67   0
  -6  -5  -4  286.68    7.80   0
   6   5   4  269.63    7.80   0
  -7  -5  -4   31.62    7.33   0
   7   5   4   43.47    7.35   0
   8   5   4   12.34    7.66   0
  -8  -5  -4   14.26    7.75   0
  15  -6  -4   68.77   12.84   0
  15  -6  -4   66.92    8.70   0
  14  -6  -4   91.08   14.48   0
  14  -6  -4  101.37   11.22   0
  13  -6  -4  352.66   13.54   0
  13  -6  -4  326.16    8.88   0
  12  -6  -4  136.62   11.46   0
  12  -6  -4  140.12   10.31   0
  11  -6  -4   42.95   12.65   0
  11  -6  -4   55.88    9.40   0
  10  -6  -4    6.15    6.34   0
  10  -6  -4    4.73   11.55   0
   9  -6  -4  177.31    7.18   0
   9  -6  -4  200.08    9.68   0
   8  -6  -4   18.84    5.96   0
   7  -6  -4  320.14    7.41   0
  -6   6   4  411.37   13.51   0
   6  -6  -4  457.64    8.06   0
   5  -6  -4 1581.13   11.85   0
  -5   6   4 1725.15   20.19   0
  -4   6   4 1653.83   11.98   0
   4  -6  -4 1526.05   11.85   0
  -3   6   4  560.91    8.22   0
   3  -6  -4  591.44   10.19   0
   2  -6  -4  449.68    7.71   0
  -2   6   4  469.36    7.71   0
  -1   6   4    1.55    5.63   0
   1  -6  -4    3.53    5.60   0
   0  -6  -4  121.95    6.13   0
   0   6   4  130.53    8.40   0
  -1  -6  -4   -2.51    5.59   0
   1   6   4    1.07    7.83   0
  -2  -6  -4  393.22    7.29   0
   2   6   4  397.75    7.43   0
   3   6   4  385.43    9.54   0
  -3  -6  -4  347.32    7.29   0
   4   6   4  860.22   11.64   0
  -4  -6  -4  744.84    8.87   0
   5   6   4   87.48    9.73   0
  -5  -6  -4   77.39    7.03   0
  -6  -6  -4   64.28   10.13   0
   6   6   4   58.56    7.20   0
  -7  -6  -4  134.86   11.07   0
   7   6   4  120.29    8.19   0
  15  -7  -4   94.98   16.30   0
  15  -7  -4  113.14    8.98   0
  14  -7  -4   63.02   14.87   0
  14  -7  -4   64.78    7.97   0
  13  -7  -4  146.51   15.78   0
  13  -7  -4  171.54   10.90   0
  12  -7  -4  381.10   11.10   0
  11  -7  -4  227.00   10.01   0
  10  -7  -4  489.83    8.59   0
  10  -7  -4  517.27   11.04   0
   9  -7  -4   -0.79    5.98   0
   9  -7  -4    4.81    5.96   0
   8  -7  -4   10.25    5.89   0
   7  -7  -4    9.55    5.92   0
  -6   7   4  162.31   10.80   0
   6  -7  -4  150.67    6.61   0
  -5   7   4  101.84    9.85   0
   5  -7  -4   76.56    6.52   0
  -4   7   4  877.21    9.36   0
   4  -7  -4  814.12    9.23   0
  -3   7   4  883.95   10.97   0
   3  -7  -4  798.22    9.05   0
   2  -7  -4  452.65    7.75   0
  -2   7   4  471.69    9.66   0
  -1   7   4  107.81    6.21   0
   1  -7  -4  129.23    6.20   0
   0  -7  -4   23.62    8.03   0
   0   7   4   31.46    8.10   0
  -1  -7  -4   64.86    6.08   0
   1   7   4   82.61    6.08   0
  -2  -7  -4   10.32    5.81   0
   2   7   4   -0.65    5.97   0
  -3  -7  -4   20.25    6.58   0
   3   7   4   25.14    8.79   0
   4   7   4   32.06    6.50   0
  -4  -7  -4   39.83    9.29   0
   5   7   4  188.87   10.42   0
  -5  -7  -4  185.98    7.85   0
  -6  -7  -4   92.09    7.82   0
   6   7   4   87.39    7.95   0
  15  -8  -4   19.28    8.35   0
  14  -8  -4   83.19   11.36   0
  13  -8  -4   81.97    7.81   0
  12  -8  -4  246.07    7.97   0
  12  -8  -4  226.97    8.20   0
  11  -8  -4  131.25   10.19   0
  11  -8  -4  125.40   10.09   0
  10  -8  -4  434.18   10.88   0
  10  -8  -4  421.44    8.45   0
   9  -8  -4  334.15    8.00   0
   8  -8  -4  139.00    6.57   0
   7  -8  -4  276.94    9.48   0
   6  -8  -4   30.99    8.58   0
  -6   8   4   31.58    9.46   0
  -5   8   4   62.55    9.66   0
   5  -8  -4   61.14    8.44   0
   4  -8  -4  103.67    6.29   0
  -4   8   4  128.15    8.68   0
  -3   8   4  365.76    9.19   0
   3  -8  -4  338.92    9.24   0
   2  -8  -4  103.20    6.29   0
  -2   8   4   94.06    6.07   0
  -1   8   4 1337.24   12.18   0
   1  -8  -4 1316.39   12.17   0
   0   8   4  602.71    8.32   0
   0  -8  -4  621.50    8.54   0
   1   8   4  517.43   10.50   0
  -1  -8  -4  480.04    8.17   0
  -2  -8  -4   19.64    6.48   0
   2   8   4   25.64    8.97   0
  -3  -8  -4   -2.12    6.47   0
   3   8   4   -0.76    6.52   0
  -4  -8  -4   61.55   10.27   0
   4   8   4   51.87    7.07   0
  -5  -8  -4   -4.98    7.53   0
   5   8   4    2.71   10.60   0
   6   8   4   15.34    7.95   0
  -6  -8  -4   10.79    7.92   0
  15  -9  -4   31.99   12.14   0
  14  -9  -4    3.72    7.87   0
  14  -9  -4   -4.76   11.18   0
  13  -9  -4   -2.16    7.29   0
  13  -9  -4   12.07   10.74   0
  12  -9  -4  188.70   10.70   0
  12  -9  -4  174.83    7.98   0
  11  -9  -4  293.92   10.79   0
  11  -9  -4  294.88   10.71   0
  10  -9  -4  261.83   10.37   0
  10  -9  -4  247.94   10.70   0
   9  -9  -4  303.21    7.97   0
   8  -9  -4  159.93    7.01   0
   7  -9  -4 1134.39   10.56   0
  -6   9   4  437.33   13.45   0
   6  -9  -4  434.47    7.85   0
   5  -9  -4   27.61    8.54   0
  -4   9   4   68.95    5.98   0
   4  -9  -4   55.76    6.12   0
   3  -9  -4  556.50    8.32   0
  -3   9   4  618.07   10.26   0
   2  -9  -4    4.94    5.78   0
  -2   9   4    7.26    5.82   0
  -1   9   4  107.97    6.47   0
   1  -9  -4  128.03    8.89   0
   0   9   4  374.85    7.78   0
   0  -9  -4  378.02   10.09   0
   1   9   4  316.83    7.73   0
  -1  -9  -4  354.61   10.21   0
  -2  -9  -4  509.03   10.98   0
   2   9   4  475.24    8.47   0
  -3  -9  -4   22.28    7.19   0
   3   9   4   21.33    7.22   0
  -4  -9  -4   21.33   10.45   0
   4   9   4   21.24    7.36   0
   5   9   4    1.92    8.02   0
  -5  -9  -4    7.20    7.86   0
  14 -10  -4   18.84   11.45   0
  14 -10  -4   37.03   11.49   0
  13 -10  -4   54.23    8.01   0
  13 -10  -4   45.35    7.79   0
  12 -10  -4   18.56    7.59   0
  12 -10  -4   30.35   10.46   0
  11 -10  -4   29.98    7.29   0
  11 -10  -4   26.90    7.13   0
  10 -10  -4   67.73    7.00   0
  10 -10  -4   44.66    6.98   0
   9 -10  -4  361.73   10.39   0
   8 -10  -4  153.55    9.41   0
   7 -10  -4  278.56    9.81   0
  -6  10   4  262.22   12.05   0
   6 -10  -4  239.88    7.31   0
   5 -10  -4  204.92    7.02   0
   4 -10  -4  451.12   10.08   0
  -4  10   4  395.57    7.64   0
  -3  10   4   10.81    8.73   0
   3 -10  -4   19.58    9.09   0
  -2  10   4    0.49    8.78   0
   2 -10  -4   12.28    8.74   0
  -1  10   4   26.27    6.44   0
   1 -10  -4   31.21    9.28   0
   0 -10  -4  188.97   10.09   0
   0  10   4  183.12    7.45   0
   1  10   4   26.68    7.09   0
  -1 -10  -4   19.91    7.09   0
  -2 -10  -4  186.87    8.08   0
   2  10   4  209.29   10.92   0
  -3 -10  -4  164.11   11.09   0
   3  10   4  137.07    8.32   0
  -4 -10  -4  122.74    8.72   0
  14 -11  -4  113.15    9.31   0
  14 -11  -4  107.35    9.05   0
  13 -11  -4   34.50    8.30   0
  13 -11  -4   39.71   11.22   0
  12 -11  -4   78.30    8.06   0
  12 -11  -4   97.96   10.94   0
  11 -11  -4   49.78    7.62   0
  11 -11  -4   57.43   10.40   0
  10 -11  -4   63.20    9.98   0
   9 -11  -4    1.80    6.63   0
   8 -11  -4  233.50    7.73   0
  -7  11   4  213.55   21.61   0
   7 -11  -4  200.28    7.19   0
  -6  11   4  251.74   12.26   0
   6 -11  -4  258.02    7.40   0
   5 -11  -4  107.27    6.84   0
   4 -11  -4  263.50   10.06   0
  -4  11   4  288.91    9.84   0
  -3  11   4  254.80    7.82   0
   3 -11  -4  265.51    7.87   0
  -2  11   4  260.92    7.47   0
   2 -11  -4  233.35    7.82   0
  -1  11   4  200.92    7.61   0
   1 -11  -4  212.64   10.23   0
   0  11   4   16.42    7.20   0
   0 -11  -4   20.74   10.24   0
  -1 -11  -4    2.06    7.34   0
   1  11   4   -2.58    7.52   0
   2  11   4   63.53    8.03   0
  -2 -11  -4   77.51   11.19   0
  13 -12  -4  134.33   12.38   0
  13 -12  -4  113.68   12.29   0
  12 -12  -4  140.72    8.59   0
  12 -12  -4  132.74    8.81   0
  11 -12  -4   33.48    7.94   0
  11 -12  -4   32.21    7.94   0
  10 -12  -4   -1.36    7.21   0
   9 -12  -4   29.82    9.87   0
   8 -12  -4   11.96    6.84   0
  -7  12   4    0.97   16.04   0
   7 -12  -4    4.74    6.91   0
  -7  12   4    1.78   16.06   0
  -6  12   4  104.79   11.57   0
   6 -12  -4  102.26    9.53   0
   5 -12  -4  394.63    8.56   0
   4 -12  -4  149.90    7.56   0
  -3  12   4  170.78    7.71   0
   3 -12  -4  158.24    7.35   0
   2 -12  -4   53.90   10.20   0
  -2  12   4   63.16   10.10   0
  -1  12   4  184.25   10.97   0
   1 -12  -4  157.83    7.96   0
   0  12   4   76.75    7.96   0
   0 -12  -4  100.89   11.03   0
  -1 -12  -4   13.55    8.01   0
   1  12   4    3.62    8.06   0
  12 -13  -4   86.27   12.46   0
  12 -13  -4  108.35   12.43   0
  11 -13  -4  245.44   12.62   0
  11 -13  -4  237.36    9.54   0
  10 -13  -4   84.65   11.17   0
   9 -13  -4  131.55    8.35   0
   8 -13  -4   27.18   10.36   0
  -7  13   4   25.38   15.56   0
  -7  13   4   18.62   17.53   0
   7 -13  -4   25.96   10.22   0
  -6  13   4   35.75   11.41   0
   6 -13  -4   23.65   10.59   0
   5 -13  -4   53.87   10.59   0
   4 -13  -4   20.75    7.62   0
  -3  13   4  192.60   11.49   0
   3 -13  -4  189.67   11.54   0
   2 -13  -4  138.35    8.34   0
  -2  13   4  160.53    8.38   0
  -1  13   4   45.47   11.44   0
   1 -13  -4   37.16    8.09   0
  11 -14  -4   63.03    8.96   0
  11 -14  -4   62.02    8.98   0
  10 -14  -4   90.41    8.90   0
   9 -14  -4  192.40    9.13   0
   8 -14  -4  196.89    8.94   0
  -7  14   4   26.78   19.23   0
   7 -14  -4   39.31   11.38   0
  -7  14   4   32.23   20.97   0
   6 -14  -4   44.03   11.23   0
  -6  14   4   47.05   12.46   0
   5 -14  -4   19.36   11.46   0
   4 -14  -4   16.98    7.74   0
   3 -14  -4   -1.69    8.31   0
   1 -16   5   41.36   12.00   0
  -1  16  -5   35.80   12.65   0
   2 -16   5    9.73   12.51   0
   2 -16   5   16.22    8.25   0
  -3  16  -5   36.29   12.35   0
   3 -16   5   29.21   11.73   0
   3 -16   5   34.28    8.95   0
  -4  16  -5   17.04   12.36   0
   4 -16   5   14.93    8.68   0
   4 -16   5   17.32   11.78   0
   5 -16   5   32.27    8.64   0
   5 -16   5   42.05   12.62   0
  -5  16  -5   25.09   12.61   0
   6 -16   5   42.75   12.46   0
   6 -16   5   45.68    9.07   0
   7 -16   5  158.63   13.23   0
   7 -16   5  144.35   13.37   0
   1  15  -5  114.45    9.44   0
  -1 -15   5  122.30   12.16   0
   0  15  -5  148.12   12.49   0
   0 -15   5  131.21    9.19   0
   1 -15   5   66.15    8.38   0
  -1  15  -5   70.01   11.64   0
   2 -15   5   69.23    8.13   0
   2 -15   5   73.80    8.57   0
  -3  15  -5   12.26   11.08   0
   3 -15   5   13.46   10.97   0
   3 -15   5   -8.60   11.22   0
  -4  15  -5   88.39   12.00   0
   4 -15   5   79.64   11.66   0
   4 -15   5   69.52    8.24   0
  -5  15  -5   16.03   11.67   0
   5 -15   5   11.96    7.86   0
   5 -15   5   22.53   11.24   0
   6 -15   5   -3.47    8.22   0
   6 -15   5    2.61   11.49   0
   7 -15   5    6.59    8.53   0
   7 -15   5   12.62    8.66   0
   8 -15   5   87.89   12.59   0
   8 -15   5   97.20   12.59   0
   9 -15   5   28.49   12.39   0
   3  14  -5   19.82    8.79   0
  -3 -14   5   21.69   11.72   0
  -2 -14   5   11.20   10.95   0
   2  14  -5    2.35   11.44   0
   1  14  -5   21.04   10.99   0
  -1 -14   5   12.79    7.35   0
   0 -14   5  121.69   10.80   0
   0  14  -5  130.71    8.33   0
  -1  14  -5  110.58   11.09   0
   1 -14   5   86.44    7.81   0
   2 -14   5  462.78   10.46   0
   2 -14   5  499.08   12.38   0
  -3  14  -5  196.16   11.63   0
   3 -14   5  149.22    8.52   0
   3 -14   5  139.26    8.23   0
   4 -14   5  111.79   10.75   0
   4 -14   5  100.39    8.23   0
  -4  14  -5  126.86   11.69   0
  -5  14  -5   79.29   11.27   0
   5 -14   5   67.38    8.05   0
   5 -14   5   84.47   11.21   0
   6 -14   5   17.54   10.52   0
   6 -14   5   14.00    7.17   0
   7 -14   5   39.55    7.96   0
   7 -14   5   26.97   11.38   0
   8 -14   5    6.95   11.47   0
   8 -14   5   14.94   11.30   0
   9 -14   5   15.03   11.90   0
   9 -14   5    9.38    8.47   0
  10 -14   5   81.12    9.26   0
  -5 -13   5   63.06    8.72   0
   5  13  -5   68.00    9.23   0
   4  13  -5  224.17    9.49   0
  -4 -13   5  239.94   12.47   0
   3  13  -5   83.98    8.35   0
  -3 -13   5   73.84    8.02   0
   2  13  -5   30.39   10.79   0
  -2 -13   5   14.67    7.28   0
  -1 -13   5    4.59    7.09   0
   1  13  -5    6.11    7.29   0
   0 -13   5  103.86    9.95   0
   0  13  -5  122.31   10.73   0
   1 -13   5   -0.66    7.01   0
  -1  13  -5    5.20    7.28   0
   2 -13   5   92.99   10.54   0
   2 -13   5   98.58   10.04   0
  -3  13  -5  186.25   10.95   0
   3 -13   5  147.90   10.80   0
   3 -13   5  153.35   10.20   0
   4 -13   5  151.34   10.99   0
  -4  13  -5  174.58   11.40   0
   4 -13   5  152.41    7.96   0
   5 -13   5  440.05    9.75   0
   5 -13   5  496.32   12.11   0
  -5  13  -5  534.49   13.88   0
   6 -13   5   56.50   10.49   0
   6 -13   5   57.47    7.41   0
   7 -13   5   22.97    7.35   0
   7 -13   5   26.91    7.56   0
   8 -13   5   19.07   10.72   0
   9 -13   5    2.72    7.88   0
  10 -13   5   14.31   11.42   0
  -6 -12   5   73.94   12.05   0
   6  12  -5   89.06   12.55   0
  -5 -12   5   83.85   11.31   0
   5  12  -5   86.97   11.77   0
  -4 -12   5   46.51   10.41   0
   4  12  -5   37.43    7.76   0
   3  12  -5  190.41    8.27   0
  -3 -12   5  187.60   10.73   0
   2  12  -5  166.47    7.91   0
  -2 -12   5  141.56    7.66   0
  -1 -12   5  335.95   10.91   0
   1  12  -5  363.01   11.31   0
   0 -12   5  102.79    7.08   0
   0  12  -5  113.78   10.30   0
  -1  12  -5    3.31    9.54   0
   1 -12   5    7.85    9.08   0
   2 -12   5    6.41    9.45   0
   2 -12   5    0.28    9.90   0
   3 -12   5   55.15    9.45   0
  -3  12  -5   64.37    9.99   0
   3 -12   5   62.69    9.95   0
  -4  12  -5   12.28    9.74   0
   4 -12   5    7.67    6.81   0
   4 -12   5   10.66    6.73   0
   5 -12   5  386.06    9.05   0
   5 -12   5  389.89    9.01   0
   6 -12   5  368.20    9.31   0
   6 -12   5  422.51   11.91   0
   7 -12   5  220.30   11.02   0
   8 -12   5  243.82    8.66   0
   9 -12   5   31.36   10.75   0
  10 -12   5   45.41    8.03   0
  11 -12   5   -2.69    8.38   0
   7  11  -5   57.07   11.91   0
  -7 -11   5   59.22    8.45   0
  -6 -11   5    9.62   10.77   0
   6  11  -5   11.36   11.09   0
  -5 -11   5  151.95    8.07   0
   5  11  -5  164.50   11.22   0
  -4 -11   5   93.58    7.17   0
   3  11  -5  293.93   10.93   0
  -3 -11   5  289.42   10.81   0
   2  11  -5  136.42   10.17   0
  -2 -11   5  123.88    9.70   0
  -1 -11   5  214.21    7.61   0
   1  11  -5  261.12   10.44   0
   0  11  -5  757.21   12.20   0
   0 -11   5  634.37   11.88   0
  -1  11  -5  171.75    7.46   0
   1 -11   5  147.78    7.21   0
   2 -11   5   67.09    9.21   0
   2 -11   5   64.90    9.64   0
  -2  11  -5   81.90    9.60   0
   3 -11   5   44.97    6.81   0
   3 -11   5   49.80    6.97   0
   4 -11   5   63.99    9.52   0
  -4  11  -5   67.14    9.91   0
   4 -11   5   60.50    9.54   0
   5 -11   5   61.43    9.34   0
   6 -11   5  143.60    9.91   0
   7 -11   5   78.81    7.19   0
   8 -11   5  591.55   14.79   0
   8 -11   5  520.07    9.42   0
   9 -11   5  248.91   13.08   0
   9 -11   5  241.55    8.60   0
  10 -11   5  100.86   12.53   0
  10 -11   5  102.87   11.19   0
  11 -11   5   33.04   12.68   0
  11 -11   5   48.80    8.61   0
   8  10  -5   38.58   11.72   0
  -8 -10   5   36.15   11.48   0
  -7 -10   5   13.03   10.52   0
   7  10  -5   11.45   10.77   0
   6  10  -5  169.02   11.04   0
  -6 -10   5  167.30   10.89   0
   5  10  -5    0.66    9.57   0
  -5 -10   5    1.97    6.47   0
  -4 -10   5   26.42    9.48   0
   4  10  -5   21.49    9.77   0
   3  10  -5  303.15   10.45   0
  -3 -10   5  290.97   10.48   0
   2  10  -5  540.93   11.39   0
  -2 -10   5  487.22   11.33   0
  -1 -10   5   16.10    8.54   0
   1  10  -5   25.53    8.83   0
   0  10  -5  550.94   11.25   0
   0 -10   5  506.64   11.29   0
  -1  10  -5  201.12    7.72   0
   1 -10   5  179.94    9.60   0
  -2  10  -5  512.04    9.62   0
   2 -10   5  464.75   11.47   0
   2 -10   5  449.47    8.95   0
   3 -10   5  405.93    8.87   0
   3 -10   5  396.59   10.86   0
  -4  10  -5   20.29    9.53   0
   4 -10   5   36.90    9.16   0
   5 -10   5   17.47    8.70   0
   6 -10   5   70.65    9.92   0
   6 -10   5   78.24    9.42   0
   7 -10   5   13.80    9.79   0
   7 -10   5   14.31    6.56   0
   8 -10   5  101.45   10.79   0
   8 -10   5   86.67    7.16   0
   9 -10   5  260.22   13.01   0
   9 -10   5  260.66    8.26   0
  10 -10   5  109.87   10.91   0
  10 -10   5   97.76   11.92   0
  11 -10   5  229.49    9.23   0
  11 -10   5  253.39   14.05   0
  12 -10   5   52.32   13.34   0
  12 -10   5   33.54    8.77   0
  -9  -9   5   29.10   11.75   0
   9   9  -5   43.88   11.71   0
   8   9  -5  145.40    8.59   0
  -8  -9   5  172.49   11.62   0
   7   9  -5   76.73    7.48   0
  -7  -9   5   91.73   10.68   0
  -6  -9   5  169.07   10.38   0
   6   9  -5  189.12   10.62   0
   5   9  -5  142.56   10.21   0
  -5  -9   5  146.06    9.75   0
   4   9  -5  128.27    9.73   0
  -4  -9   5  104.20    7.01   0
   3   9  -5  127.18    6.84   0
  -3  -9   5  123.30    9.04   0
   2   9  -5    9.68    6.22   0
  -2  -9   5    3.67    8.46   0
   1   9  -5    3.61    6.16   0
  -1  -9   5    5.60    8.13   0
   0   9  -5  376.05   10.29   0
   0  -9   5  324.69   10.09   0
  -1   9  -5  684.58   10.17   0
   1  -9   5  666.95   12.41   0
  -2   9  -5  123.58    9.54   0
   2  -9   5  110.24    6.91   0
   2  -9   5  105.64    9.44   0
   3  -9   5  745.76   11.95   0
   4  -9   5  327.56   11.31   0
   4  -9   5  292.76    8.22   0
   5  -9   5  615.57   11.10   0
   5  -9   5  542.66    9.00   0
   6  -9   5  172.26    7.02   0
   6  -9   5  203.27   10.73   0
   7  -9   5   11.57    9.57   0
   7  -9   5    6.71    8.97   0
   8  -9   5   58.23   10.54   0
   8  -9   5   67.03    7.00   0
   9  -9   5  232.22   12.37   0
   9  -9   5  230.36   10.80   0
  10  -9   5    8.18   10.49   0
  10  -9   5    4.32   10.96   0
  11  -9   5   72.14    8.93   0
  11  -9   5   58.93    8.46   0
  12  -9   5  104.91   10.42   0
  12  -9   5  114.01    9.32   0
  10   8  -5   52.07   11.96   0
 -10  -8   5   58.51   12.17   0
   9   8  -5    0.93   10.61   0
  -9  -8   5   -1.45   10.86   0
   8   8  -5   79.28    7.45   0
  -8  -8   5   90.74   10.54   0
  -7  -8   5  314.15   11.16   0
   7   8  -5  269.04    8.61   0
  -6  -8   5  326.10    8.88   0
   6   8  -5  374.65   11.50   0
  -5  -8   5  311.51   10.60   0
   5   8  -5  317.32   10.85   0
  -4  -8   5   18.44    8.36   0
   4   8  -5    9.11    6.20   0
   3   8  -5   43.26    8.64   0
  -3  -8   5   29.88    8.33   0
  -2  -8   5  212.24    9.56   0
   2   8  -5  246.72    9.72   0
   1   8  -5  160.62    7.12   0
  -1  -8   5  147.20    9.30   0
   0   8  -5   58.99    6.59   0
   0  -8   5   52.26    8.59   0
   0  -8   5   49.37    9.19   0
  -1   8  -5 1651.97   13.92   0
   1  -8   5 1411.11   13.79   0
   2  -8   5  528.86   10.15   0
  -2   8  -5  582.70   12.08   0
   3  -8   5  951.34   11.14   0
   3  -8   5 1160.06   14.59   0
   4  -8   5  418.65   11.62   0
   4  -8   5  366.48    8.18   0
   5  -8   5  272.25    7.83   0
   5  -8   5  319.00   11.00   0
   6  -8   5  593.32   11.05   0
   6  -8   5  664.03   13.29   0
   7  -8   5   93.74   10.21   0
   7  -8   5   99.08    6.61   0
   8  -8   5  115.82   10.85   0
   8  -8   5   93.87   10.15   0
   9  -8   5   11.48    6.96   0
   9  -8   5   11.30   10.37   0
  10  -8   5   15.37   10.90   0
  10  -8   5   15.19    7.03   0
  11  -8   5   15.07   11.37   0
  11  -8   5   20.98    7.69   0
  12  -8   5   76.23    8.97   0
  12  -8   5   72.75    9.80   0
  11   7  -5   50.61    8.71   0
 -11  -7   5   50.34   12.48   0
  10   7  -5    9.16   10.85   0
 -10  -7   5   11.34   11.14   0
   9   7  -5   12.46    6.95   0
  -9  -7   5   19.09   10.21   0
   8   7  -5    3.04    9.29   0
  -8  -7   5    0.35    9.53   0
   7   7  -5  187.84   10.37   0
  -7  -7   5  205.30   10.56   0
  -6  -7   5   19.77    8.51   0
   6   7  -5   18.38    8.66   0
  -5  -7   5  748.45   13.09   0
   5   7  -5  749.74   13.28   0
  -4  -7   5  524.72   12.05   0
   4   7  -5  521.45   12.57   0
  -3  -7   5  236.42   10.11   0
   3   7  -5  265.52    7.34   0
   2   7  -5  437.77   10.19   0
  -2  -7   5  308.57    8.83   0
   1   7  -5   55.32    7.09   0
  -1  -7   5   67.53    8.43   0
   0   7  -5  112.44    9.16   0
   0  -7   5  100.69    6.70   0
   0  -7   5  107.21    9.25   0
  -1   7  -5  113.86    6.60   0
   2  -7   5    1.60    6.46   0
  -2   7  -5    5.57    6.28   0
   2  -7   5   10.49    6.10   0
   3  -7   5   48.75    6.40   0
  -3   7  -5   53.02    9.05   0
   3  -7   5   47.80    8.64   0
   4  -7   5  878.05   13.61   0
   4  -7   5  796.73   11.76   0
   5  -7   5  216.84   10.79   0
   5  -7   5  188.24    9.34   0
   6  -7   5  333.66   11.56   0
  -6   7  -5  304.24    9.79   0
   6  -7   5  301.61    7.71   0
  -7   7  -5  122.01    9.28   0
   7  -7   5  135.20   10.49   0
   7  -7   5  120.56    6.68   0
   8  -7   5  148.82    7.23   0
   8  -7   5  173.88   10.76   0
  -8   7  -5  144.85    7.10   0
   9  -7   5  270.47   10.65   0
  -9   7  -5  259.04    8.12   0
   9  -7   5  249.85    9.16   0
  10  -7   5   16.14   10.14   0
  10  -7   5   23.01   11.00   0
 -10   7  -5   23.29   10.14   0
  11  -7   5    6.04   10.74   0
  11  -7   5   -2.86    7.81   0
 -11   7  -5    5.41    7.47   0
  12  -7   5   72.89   12.19   0
 -12   7  -5   95.47   12.52   0
  12  -7   5   62.89    9.20   0
  11   6  -5  190.93   12.18   0
 -11  -6   5  192.83   12.43   0
  10   6  -5  231.52   11.38   0
 -10  -6   5  220.40   11.74   0
  -9  -6   5   88.45   10.40   0
   9   6  -5   80.71    7.42   0
   8   6  -5   55.58    9.58   0
  -8  -6   5   58.81    9.88   0
   7   6  -5  112.61    9.32   0
  -7  -6   5  116.25    9.49   0
   6   6  -5   10.19    8.40   0
  -6  -6   5   14.36    8.31   0
  -5  -6   5  165.28    9.59   0
   5   6  -5  173.28    9.86   0
   4   6  -5  839.62   15.19   0
  -4  -6   5  828.76   14.76   0
   3   6  -5  492.17    8.54   0
  -3  -6   5  418.66   12.26   0
   2   6  -5 3654.26   18.47   0
  -2  -6   5 3091.22   26.73   0
   1   6  -5 2098.43   14.67   0
  -1  -6   5 1849.74   20.18   0
  -1  -6   5 1855.88   21.44   0
   0   6  -5  642.85   10.97   0
   0  -6   5  521.78   10.89   0
   1  -6   5  244.12    7.64   0
  -1   6  -5  251.34    7.77   0
   2  -6   5   10.78    8.84   0
   2  -6   5   11.58    5.94   0
  -2   6  -5   12.23    6.10   0
   3  -6   5  166.29    9.62   0
  -3   6  -5  158.23    9.38   0
   3  -6   5  156.58    6.65   0
   4  -6   5   21.02    9.48   0
  -4   6  -5   23.45    5.86   0
   4  -6   5   14.13    8.76   0
   5  -6   5  247.89    8.65   0
  -5   6  -5  245.35    7.42   0
   5  -6   5  232.07    7.16   0
   6  -6   5  665.57   13.76   0
  -6   6  -5  671.19    8.99   0
   6  -6   5  693.68    9.31   0
   7  -6   5 1045.33   14.54   0
   7  -6   5  967.52   10.36   0
  -7   6  -5  965.61   12.28   0
   8  -6   5  170.54    7.17   0
   8  -6   5  193.98   10.74   0
  -8   6  -5  171.15    7.20   0
   9  -6   5  288.47   11.98   0
   9  -6   5  247.06    7.84   0
  -9   6  -5  263.04    7.75   0
  10  -6   5   69.89    7.72   0
  10  -6   5   79.81   11.15   0
 -10   6  -5   70.54   10.16   0
  11  -6   5  115.57   12.21   0
  11  -6   5  104.82    8.30   0
 -11   6  -5  123.31   11.24   0
  12  -6   5   41.79    8.96   0
  12  -6   5   35.97   13.18   0
 -12   6  -5   27.62    8.83   0
  12   5  -5   77.84    8.83   0
 -12  -5   5   90.24   12.46   0
 -11  -5   5   69.78   11.22   0
  11   5  -5   62.64   10.82   0
 -10  -5   5  195.41    8.48   0
  10   5  -5  208.57   10.73   0
  -9  -5   5  240.78    8.56   0
   9   5  -5  255.31   10.81   0
  -8  -5   5  603.73   12.43   0
   8   5  -5  609.03   11.96   0
   7   5  -5  238.57    9.89   0
  -7  -5   5  233.74   10.11   0
  -6  -5   5  151.87    9.69   0
   6   5  -5  150.94    9.34   0
   5   5  -5   -1.38    9.83   0
  -5  -5   5    3.56    8.11   0
  -4  -5   5  467.73   14.59   0
   4   5  -5  520.09   10.77   0
   4   5  -5  427.72   13.33   0
  -3  -5   5   55.45   10.05   0
   3   5  -5   66.28    6.61   0
  -2  -5   5  329.94   13.79   0
   2   5  -5  407.62   10.51   0
  -2  -5   5  354.02   15.43   0
  -1  -5   5 1327.35   19.20   0
   1   5  -5 1496.59   12.98   0
  -1  -5   5 1324.90   19.63   0
   0  -5   5  802.57   10.57   0
   0   5  -5  858.12   12.30   0
   0  -5   5  776.20   13.90   0
   1  -5   5 2128.85   15.93   0
  -1   5  -5 2269.91   17.08   0
  -2   5  -5   36.51    6.22   0
  -2   5  -5   33.97    8.21   0
   2  -5   5   29.23    8.69   0
   2  -5   5   29.79    5.65   0
   3  -5   5  248.03   10.56   0
  -3   5  -5  213.98    7.11   0
   3  -5   5  217.68    7.19   0
  -4   5  -5   17.56    8.04   0
   4  -5   5   28.28    9.45   0
   4  -5   5   17.65    5.90   0
   5  -5   5   27.47    6.90   0
   5  -5   5   62.83    6.02   0
  -5   5  -5    9.71    5.77   0
   6  -5   5   -7.75    8.41   0
   6  -5   5    3.93    7.14   0
  -6   5  -5    7.53    5.86   0
   7  -5   5  686.91   11.04   0
   7  -5   5  568.15   10.46   0
  -7   5  -5  688.59    8.92   0
  -8   5  -5  232.43    9.39   0
   8  -5   5  201.96    7.16   0
   9  -5   5  274.71    7.99   0
  -9   5  -5  292.57    7.97   0
  10  -5   5  193.33    7.88   0
 -10   5  -5  211.81    8.10   0
  11  -5   5   34.05   10.94   0
 -11   5  -5   41.05    7.61   0
  12  -5   5  112.64    8.94   0
 -12   5  -5   99.62    9.03   0
 -13  -4   5   40.61   12.69   0
  13   4  -5   37.82   12.01   0
  12   4  -5   50.23   11.02   0
 -12  -4   5   40.41   11.54   0
 -11  -4   5   44.32    7.68   0
  11   4  -5   47.73   10.06   0
 -10  -4   5  212.43   10.83   0
  10   4  -5  196.25   10.37   0
  -9  -4   5  204.74    7.91   0
   9   4  -5  229.17   10.15   0
  -8  -4   5   19.33    8.95   0
   8   4  -5   11.64    8.36   0
  -7  -4   5  539.65   12.22   0
   7   4  -5  485.03   11.46   0
  -6  -4   5  742.22   14.09   0
   6   4  -5  695.79   13.35   0
   5   4  -5 1066.69   18.40   0
  -5  -4   5 1094.96   19.26   0
   4   4  -5   10.55    6.04   0
   4   4  -5    6.82   10.57   0
  -4  -4   5    5.45    9.50   0
   3   4  -5  109.83    6.95   0
   2   4  -5  196.95    9.63   0
  -1  -4   5  975.59   17.68   0
   1   4  -5 1162.24   13.40   0
  -1  -4   5 1084.88   11.88   0
   0  -4   5   84.50    6.81   0
   0   4  -5   94.93    9.02   0
   0  -4   5   79.28    8.77   0
   0   4  -5   82.48    9.54   0
  -1   4  -5 2028.83   16.82   0
   1  -4   5 2290.34   17.69   0
  -1   4  -5 2200.04   15.81   0
   2  -4   5 1611.01   14.71   0
  -2   4  -5 1707.64   15.13   0
   2  -4   5 1570.31   13.33   0
   3  -4   5 1673.96   14.59   0
  -3   4  -5 1656.06   14.14   0
   3  -4   5 1565.66   12.60   0
  -4   4  -5  781.67    9.36   0
   4  -4   5  665.57   10.50   0
   4  -4   5  827.24   11.20   0
   5  -4   5   10.77    5.67   0
  -5   4  -5    6.85    5.58   0
   6  -4   5  143.24    8.76   0
  -6   4  -5  152.66    6.52   0
  -7   4  -5    8.03    8.48   0
   7  -4   5    3.23    5.81   0
   8  -4   5   12.37    8.78   0
  -8   4  -5    5.12    8.53   0
   9  -4   5   46.70    6.76   0
  -9   4  -5   49.26    9.35   0
  10  -4   5  401.22   11.49   0
 -10   4  -5  434.65   11.32   0
  11  -4   5  109.38    8.52   0
 -11   4  -5  116.12    8.17   0
 -13  -3   5   88.57    9.17   0
  13   3  -5   83.87    8.77   0
 -12  -3   5   48.72   10.88   0
  12   3  -5   43.92   10.50   0
  11   3  -5   20.43    6.79   0
 -11  -3   5   35.95   10.40   0
  10   3  -5   11.99    9.09   0
 -10  -3   5   10.43    6.89   0
   9   3  -5  509.53    9.35   0
  -9  -3   5  592.75   12.36   0
   8   3  -5  201.41    9.73   0
  -8  -3   5  200.20    9.84   0
   7   3  -5  333.67   10.28   0
  -7  -3   5  331.40   10.74   0
   6   3  -5  729.79   13.84   0
  -6  -3   5  702.55   14.43   0
  -5  -3   5  256.35   13.46   0
   5   3  -5  246.89   10.65   0
   5   3  -5  285.41    7.72   0
   4   3  -5  385.95   10.57   0
   3   3  -5  549.02   11.18   0
  -2  -3   5  160.95    7.32   0
   2   3  -5  161.71    7.33   0
   1   3  -5    4.25    8.06   0
  -1  -3   5    5.12    8.51   0
   1   3  -5    2.84    8.49   0
  -1  -3   5    2.32    7.57   0
   0   3  -5    9.85    6.23   0
   0  -3   5    9.57    6.08   0
   0   3  -5   10.63    8.38   0
   1  -3   5    4.69    7.44   0
   1  -3   5    1.92    9.33   0
  -1   3  -5    2.11    5.39   0
   2  -3   5  535.03    9.61   0
   2  -3   5  512.34    8.45   0
  -2   3  -5  506.93    8.51   0
   3  -3   5  360.03    9.01   0
   3  -3   5  379.99    9.36   0
  -3   3  -5  387.07    9.37   0
   4  -3   5 1580.99   11.94   0
  -4   3  -5 1539.03   11.76   0
   5  -3   5  661.34    8.72   0
  -5   3  -5  652.38    8.48   0
   6  -3   5  427.12    7.79   0
  -6   3  -5  383.20    7.61   0
   7  -3   5  124.13    6.74   0
  -7   3  -5  141.00    8.96   0
   8  -3   5   -1.45    8.77   0
  -8   3  -5    6.57    8.71   0
   9  -3   5   28.58    6.67   0
  -9   3  -5   30.49    6.64   0
  10  -3   5   13.55    9.93   0
 -10   3  -5   33.29   10.10   0
  11  -3   5   22.71    8.09   0
 -11   3  -5   20.56    8.05   0
  14   2  -5   49.43    8.93   0
  13   2  -5  103.16    8.45   0
 -13  -2   5   99.17    8.74   0
 -12  -2   5   33.37   10.64   0
  12   2  -5   35.23   10.22   0
 -11  -2   5   64.04   10.04   0
  11   2  -5   59.54    9.64   0
  10   2  -5  158.26    9.77   0
 -10  -2   5  136.93    7.46   0
  -9  -2   5   25.60    6.75   0
   9   2  -5   14.41    6.32   0
   8   2  -5   27.18    6.26   0
  -8  -2   5   26.34    8.88   0
   7   2  -5  369.11   10.65   0
  -7  -2   5  358.09   11.23   0
   6   2  -5 1440.17   17.65   0
   6   2  -5 1314.51   13.50   0
   5   2  -5  524.36   10.58   0
   5   2  -5  489.11   14.21   0
   4   2  -5 1028.25   11.67   0
   4   2  -5  953.48   24.10   0
   4   2  -5  895.11   22.99   0
  -3  -2   5 1451.81   13.19   0
   3   2  -5 1420.16   13.14   0
   3   2  -5 1264.49   39.86   0
   3   2  -5 1199.12   36.63   0
  -2  -2   5 1360.49   13.42   0
   2   2  -5 1363.53   14.74   0
  -2  -2   5 1214.33   21.84   0
   2   2  -5 1218.83   22.15   0
  -1  -2   5 1504.21   18.00   0
   1   2  -5 1348.59   16.59   0
   1   2  -5 1619.46   14.40   0
  -1  -2   5 1680.77   16.00   0
   0   2  -5    3.59    5.46   0
   0  -2   5    0.65    6.31   0
   0   2  -5    6.95    6.57   0
   1  -2   5   39.92    5.64   0
   1  -2   5   37.73    6.74   0
  -1   2  -5   37.22    7.65   0
   2  -2   5  649.44    9.21   0
   2  -2   5  888.47   11.97   0
  -2   2  -5  692.05   10.78   0
  -3   2  -5  792.60    9.57   0
   3  -2   5  851.95   11.30   0
   4  -2   5  463.34    9.40   0
  -4   2  -5  467.01    9.43   0
   5  -2   5  724.25    8.89   0
  -5   2  -5  681.16    8.63   0
  -6   2  -5  391.73    7.56   0
   6  -2   5  386.79    7.66   0
   7  -2   5  926.80    9.40   0
  -7   2  -5 1097.43   11.43   0
   8  -2   5  132.05    6.76   0
  -8   2  -5  151.74    6.80   0
  -9   2  -5   44.52    6.78   0
   9  -2   5   29.55    6.83   0
  10  -2   5   -5.55    7.35   0
 -10   2  -5   -0.18   10.51   0
  11  -2   5   -2.68   11.84   0
 -11   2  -5   -1.23    8.21   0
  14   1  -5   45.37   11.83   0
  13   1  -5  141.56   11.40   0
  12   1  -5  438.75    9.57   0
  11   1  -5  134.47    7.31   0
  10   1  -5  102.77    9.36   0
   9   1  -5    7.91    8.65   0
   8   1  -5   21.16    8.20   0
   7   1  -5  620.82    9.52   0
   7   1  -5  609.11   12.01   0
   6   1  -5  823.63   10.34   0
   6   1  -5  806.43   13.95   0
   5   1  -5  291.07   10.12   0
   5   1  -5  277.83   11.48   0
   4   1  -5 1341.62   13.09   0
   4   1  -5 1178.93   18.91   0
   4   1  -5 1162.25   20.17   0
  -3  -1   5 1328.00   13.32   0
   3   1  -5 1287.28   13.18   0
   3   1  -5 1125.51   18.18   0
  -3  -1   5 1183.36   19.12   0
   2   1  -5  145.05    7.59   0
  -2  -1   5  131.64    8.92   0
   2   1  -5  131.63    8.87   0
  -2  -1   5  154.49    7.48   0
   1   1  -5 1454.57   15.23   0
  -1  -1   5 1740.12   16.79   0
   1   1  -5 1696.31   16.73   0
   0   1  -5  375.18    8.39   0
   0  -1   5  434.20    9.43   0
   0  -1   5  399.86    8.41   0
  -1   1  -5  344.89    7.65   0
   1  -1   5  341.94    7.61   0
   2  -1   5    1.52    5.67   0
  -2   1  -5   -0.28    5.32   0
  -3   1  -5  641.37   10.12   0
   3  -1   5  634.92    8.56   0
   4  -1   5   71.55    6.02   0
  -4   1  -5   79.14    6.02   0
   5  -1   5   61.54    5.97   0
  -5   1  -5   53.55    5.92   0
   6  -1   5   12.51    8.18   0
  -6   1  -5    0.45    5.86   0
  -7   1  -5  132.64    6.60   0
   7  -1   5  141.43    6.71   0
   8  -1   5  422.81    8.06   0
  -8   1  -5  419.46    8.02   0
   9  -1   5   78.13    7.13   0
  -9   1  -5   93.32    7.10   0
  10  -1   5  116.38    8.11   0
 -10   1  -5  120.05    7.96   0
 -11   1  -5    0.07   11.73   0
  11  -1   5    1.93   11.73   0
  14   0  -5   17.45   11.29   0
  13   0  -5    9.05   10.56   0
  12   0  -5  142.22    7.93   0
  11   0  -5  292.70    8.42   0
  10   0  -5  309.83    8.20   0
   9   0  -5  263.72   10.36   0
   8   0  -5  162.11    9.56   0
   8   0  -5  151.74    9.37   0
   7   0  -5  811.70   12.12   0
   7   0  -5  697.95   10.92   0
   6   0  -5   65.95    6.48   0
   6   0  -5   65.94    8.98   0
   5   0  -5    4.43    8.06   0
   5   0  -5    2.28    8.09   0
   5   0  -5    2.98    8.51   0
   4   0  -5  289.57    8.23   0
  -4   0   5  321.69    8.14   0
   4   0  -5  284.38   10.35   0
  -3   0   5 2179.33   17.86   0
   3   0  -5 1694.64   17.23   0
   3   0  -5 1920.51   15.97   0
   2   0  -5 1544.87   16.69   0
  -2   0   5 1623.46   15.12   0
   2   0  -5 1395.80   14.88   0
  -1   0   5 6946.83   27.91   0
  -1   0   5 6778.82   28.55   0
   1   0  -5 5347.52   25.02   0
   0   0  -5 1472.39   12.80   0
   0   0   5  976.85   12.40   0
   0   0   5 1578.22   13.09   0
  -1   0  -5  679.44    9.11   0
   1   0   5  675.64    9.03   0
  -2   0  -5 1418.33   12.54   0
   2   0   5 1341.98   11.09   0
  -3   0  -5  216.73    6.51   0
   3   0   5  224.12    8.53   0
  -4   0  -5  526.87    9.53   0
   4   0   5  499.56    7.85   0
   5   0   5   34.91    5.96   0
  -5   0  -5   30.39    5.82   0
   6   0   5  353.75    7.35   0
  -6   0  -5  406.46    9.36   0
   7   0   5  185.37    9.28   0
  -7   0  -5  170.54    6.74   0
   8   0   5  335.68    8.26   0
  -8   0  -5  322.82    7.94   0
   9   0   5   39.39    7.15   0
  -9   0  -5   24.86    7.26   0
  10   0   5  195.44    8.93   0
 -10   0  -5  197.29    8.76   0
  15  -1  -5   60.04   12.35   0
  14  -1  -5    9.55    7.85   0
  13  -1  -5   48.08    7.96   0
  12  -1  -5   20.97    7.11   0
  11  -1  -5  305.33    8.23   0
  10  -1  -5  229.93    7.73   0
  10  -1  -5  213.10    7.58   0
   9  -1  -5  867.30   13.01   0
   9  -1  -5  749.14   10.95   0
   8  -1  -5 1725.59   14.63   0
   8  -1  -5 1579.48   14.05   0
   7  -1  -5 1534.01   15.34   0
   7  -1  -5 1411.60   15.15   0
   6  -1  -5  227.58    9.69   0
   6  -1  -5  188.45    7.44   0
   6  -1  -5  208.05    9.94   0
   5  -1  -5   16.76    5.90   0
   5  -1  -5   21.10    6.05   0
  -5   1   5   22.75    5.79   0
  -4   1   5    3.16    5.78   0
   4  -1  -5    4.11    5.95   0
   4  -1  -5    0.79    7.69   0
   3  -1  -5   49.61    7.96   0
   3  -1  -5   52.40    9.16   0
  -3   1   5   45.75    5.78   0
  -3   1   5   47.21    6.48   0
  -2   1   5   30.43    6.58   0
  -2   1   5   43.39    5.79   0
   2  -1  -5   41.29    7.78   0
  -1   1   5 1427.30   12.66   0
  -1   1   5 1695.01   16.22   0
   1  -1  -5 1346.74   12.34   0
   0  -1  -5 1919.97   13.71   0
   0   1   5 2183.85   15.57   0
  -1  -1  -5  126.88    6.11   0
   1   1   5  139.36    8.29   0
  -2  -1  -5  789.72    8.97   0
   2   1   5  880.74    9.28   0
  -3  -1  -5   41.92    5.84   0
   3   1   5   40.70    5.67   0
  -4  -1  -5  434.65    7.53   0
   4   1   5  399.82    7.54   0
  -5  -1  -5  319.33    7.07   0
   5   1   5  350.16    9.27   0
   6   1   5   16.34    8.32   0
  -6  -1  -5    6.67    8.22   0
   7   1   5   15.55    6.24   0
  -7  -1  -5   25.71    6.18   0
   8   1   5  329.85   10.60   0
  -8  -1  -5  325.70   10.75   0
   9   1   5   91.92    7.85   0
  -9  -1  -5  112.26   10.89   0
  10   1   5   62.11    8.65   0
 -10  -1  -5   69.93    8.51   0
  15  -2  -5   79.47    9.45   0
  15  -2  -5   79.51    9.20   0
  14  -2  -5  127.08    8.86   0
  14  -2  -5  162.56   11.73   0
  13  -2  -5   16.64    7.36   0
  13  -2  -5   13.84    9.95   0
  12  -2  -5   49.19    7.35   0
  12  -2  -5   38.09   10.02   0
  11  -2  -5  102.10    9.72   0
  11  -2  -5   90.81    7.13   0
  10  -2  -5   86.18    7.29   0
  10  -2  -5   76.44   10.60   0
   9  -2  -5   13.81    8.79   0
   9  -2  -5   15.03    6.10   0
   8  -2  -5  930.03   13.31   0
   8  -2  -5  915.74   12.42   0
   7  -2  -5  509.29   11.45   0
   7  -2  -5  423.04    8.80   0
   6  -2  -5 2443.32   18.97   0
   6  -2  -5 2166.16   15.98   0
   5  -2  -5  616.33   12.55   0
  -5   2   5  641.10   12.09   0
   5  -2  -5  509.42    9.19   0
  -4   2   5  116.05    8.94   0
   4  -2  -5   99.60    7.56   0
   4  -2  -5   94.59    6.09   0
  -4   2   5  102.82    8.20   0
   3  -2  -5  183.38    8.56   0
  -3   2   5  193.30    9.86   0
  -3   2   5  172.23    6.68   0
  -2   2   5  119.81    7.49   0
  -2   2   5  115.38    8.13   0
   2  -2  -5   96.17    6.01   0
  -1   2   5  190.09    6.52   0
   1  -2  -5  199.89    6.56   0
   0   2   5   33.76    5.72   0
   0  -2  -5   32.52    7.89   0
  -1  -2  -5  532.08    9.68   0
   1   2   5  540.44    9.70   0
  -2  -2  -5 1318.16   10.64   0
   2   2   5 1356.68   10.77   0
  -3  -2  -5 1243.87   11.68   0
   3   2   5 1239.99   11.83   0
  -4  -2  -5  217.88    6.75   0
   4   2   5  244.39    9.04   0
  -5  -2  -5  331.10    7.27   0
   5   2   5  324.74    7.22   0
  -6  -2  -5  147.67    6.77   0
   6   2   5  165.31    6.85   0
   7   2   5  141.98    7.29   0
  -7  -2  -5  171.01    9.68   0
   8   2   5   12.21   10.01   0
  -8  -2  -5   28.67    7.07   0
   9   2   5    8.51    7.88   0
  -9  -2  -5    8.26   11.08   0
  15  -3  -5   58.18   12.29   0
  15  -3  -5   58.26    9.10   0
  14  -3  -5  172.21    8.79   0
  14  -3  -5  161.38    8.95   0
  13  -3  -5  129.67   10.98   0
  13  -3  -5  106.26    8.09   0
  12  -3  -5  620.21   10.77   0
  12  -3  -5  593.42    9.97   0
  11  -3  -5  329.13   11.38   0
  11  -3  -5  282.50    8.22   0
  10  -3  -5   92.82    9.66   0
  10  -3  -5   78.27    6.85   0
   9  -3  -5   69.99    9.31   0
   9  -3  -5   81.59    6.67   0
   8  -3  -5  504.39   12.09   0
   8  -3  -5  458.58    8.97   0
   7  -3  -5    3.72    8.50   0
   7  -3  -5    2.34    8.99   0
   6  -3  -5  314.83   11.34   0
  -6   3   5  316.36   10.64   0
   6  -3  -5  298.48    9.41   0
  -5   3   5 1957.58   19.29   0
   5  -3  -5 1692.82   13.46   0
   5  -3  -5 1867.55   19.56   0
  -4   3   5  973.50   13.85   0
  -4   3   5  856.72   10.09   0
   4  -3  -5  872.63   10.15   0
   3  -3  -5 3074.22   16.73   0
  -3   3   5 3107.67   16.86   0
  -3   3   5 3495.49   22.06   0
   2  -3  -5  181.79    8.80   0
  -2   3   5  182.39    6.88   0
  -1   3   5   10.17    7.54   0
   1  -3  -5    5.50    7.71   0
   0  -3  -5   21.84    5.51   0
   0   3   5   31.72    5.46   0
   1   3   5   44.33    5.64   0
  -1  -3  -5   49.92    5.86   0
   2   3   5    0.25    7.80   0
  -2  -3  -5    5.94    5.48   0
  -3  -3  -5  501.05    7.67   0
   3   3   5  520.34    7.98   0
  -4  -3  -5  408.13    9.32   0
   4   3   5  371.93    7.33   0
  -5  -3  -5  588.36   10.19   0
   5   3   5  585.23    8.32   0
  -6  -3  -5  387.32   10.21   0
   6   3   5  362.47    8.00   0
   7   3   5   22.90    6.86   0
  -7  -3  -5   14.70    6.66   0
   8   3   5   80.06   11.10   0
  -8  -3  -5  109.57    7.75   0
   9   3   5   19.76    8.39   0
  -9  -3  -5   22.59   11.65   0
  15  -4  -5   52.00    8.65   0
  15  -4  -5   60.57   12.31   0
  14  -4  -5  121.58   11.80   0
  14  -4  -5  105.99   11.29   0
  13  -4  -5   43.63    7.66   0
  13  -4  -5   46.08    7.50   0
  12  -4  -5  208.57   11.06   0
  12  -4  -5  173.26    7.79   0
  11  -4  -5  441.94   12.18   0
  11  -4  -5  404.69    8.52   0
  10  -4  -5  212.70   10.62   0
  10  -4  -5  194.43    9.84   0
   9  -4  -5  263.27   11.09   0
   9  -4  -5  258.21   10.22   0
   8  -4  -5  111.84    6.68   0
   8  -4  -5  122.43   10.06   0
   8  -4  -5  108.10    6.67   0
   7  -4  -5  196.00    6.87   0
   7  -4  -5  215.72   11.17   0
  -6   4   5  211.57   10.13   0
   6  -4  -5  183.28    9.18   0
  -5   4   5 1203.64   15.51   0
   5  -4  -5 1105.18   12.36   0
   4  -4  -5  200.82    8.72   0
  -4   4   5  225.54   10.04   0
  -4   4   5  171.78    6.56   0
   3  -4  -5 1660.17   13.56   0
  -3   4   5 1612.91   14.58   0
  -3   4   5 1583.37   12.04   0
  -2   4   5 2114.52   14.41   0
   2  -4  -5 2051.37   14.30   0
  -1   4   5  569.27    8.19   0
   1  -4  -5  561.97    8.14   0
   0   4   5 1027.53    9.70   0
   0  -4  -5 1022.83    9.84   0
   1   4   5    4.26    5.59   0
  -1  -4  -5    8.25    7.92   0
   2   4   5   14.02    5.74   0
  -2  -4  -5   24.15    5.77   0
  -3  -4  -5   55.49    8.20   0
   3   4   5   43.30    5.99   0
   4   4   5   71.57    6.05   0
  -4  -4  -5   75.97    6.09   0
   5   4   5   70.89    9.11   0
  -5  -4  -5   77.33    8.86   0
  -6  -4  -5  602.10   11.18   0
   6   4   5  542.33    8.85   0
  -7  -4  -5  151.59   10.50   0
   7   4   5  120.63    7.91   0
   8   4   5  162.61   11.52   0
  -8  -4  -5  171.82    8.48   0
  15  -5  -5    3.68   11.91   0
  15  -5  -5   -1.10   11.70   0
  14  -5  -5   -1.77   10.96   0
  14  -5  -5   13.01    7.60   0
  13  -5  -5  269.05   12.39   0
  13  -5  -5  248.27   11.36   0
  12  -5  -5  267.71   12.01   0
  12  -5  -5  256.34   10.82   0
  11  -5  -5  240.86   11.55   0
  11  -5  -5  253.32   10.27   0
  10  -5  -5  150.16   10.46   0
  10  -5  -5  143.59    7.15   0
   9  -5  -5  189.29   11.89   0
   9  -5  -5  187.58    9.84   0
   9  -5  -5  168.05    7.42   0
   8  -5  -5  660.68   15.09   0
   8  -5  -5  579.42    9.17   0
   7  -5  -5  260.54    7.36   0
  -6   5   5  128.98    9.75   0
   6  -5  -5  119.83    8.50   0
  -5   5   5  126.13    9.75   0
   5  -5  -5  152.93    8.51   0
   4  -5  -5    5.77    5.43   0
  -4   5   5    4.86    8.67   0
  -4   5   5    6.38    7.60   0
   3  -5  -5  175.05    8.54   0
  -3   5   5  171.38    6.15   0
  -2   5   5  372.94    7.18   0
   2  -5  -5  353.22    7.05   0
  -1   5   5  139.69    6.16   0
   1  -5  -5  136.69    6.15   0
   0   5   5 1416.65   12.15   0
   0  -5  -5 1386.66   12.15   0
   1   5   5  562.13    7.86   0
  -1  -5  -5  546.91    7.80   0
   2   5   5  290.89    8.91   0
  -2  -5  -5  267.84    6.85   0
   3   5   5   46.65    5.89   0
  -3  -5  -5   52.26    5.91   0
   4   5   5    9.24    6.02   0
  -4  -5  -5   17.91    8.71   0
   5   5   5   50.72    9.01   0
  -5  -5  -5   35.14    9.05   0
  -6  -5  -5   29.36    9.84   0
   6   5   5   23.57    7.21   0
  -7  -5  -5   48.98   10.93   0
   7   5   5   50.84    8.01   0
  15  -6  -5    4.21   11.96   0
  15  -6  -5    0.86   11.83   0
  14  -6  -5   33.44   11.15   0
  14  -6  -5   37.01    7.94   0
  13  -6  -5   22.12   12.99   0
  13  -6  -5   11.71   10.12   0
  12  -6  -5   97.68   13.89   0
  12  -6  -5  103.97   10.34   0
  11  -6  -5  278.19   13.19   0
  11  -6  -5  263.74   10.21   0
  11  -6  -5  275.65    8.05   0
  10  -6  -5  762.10   19.56   0
  10  -6  -5  712.76    9.53   0
  10  -6  -5  715.46    9.58   0
   9  -6  -5  235.66    7.57   0
   9  -6  -5  243.73    9.82   0
   8  -6  -5  284.38    7.83   0
  -7   6   5  233.46   11.09   0
   7  -6  -5  233.97    9.25   0
   6  -6  -5  548.81    8.26   0
  -6   6   5  575.41   13.19   0
  -5   6   5  397.61   11.63   0
  -5   6   5  355.09    7.28   0
   5  -6  -5  375.65    9.28   0
  -4   6   5   28.50    8.02   0
   4  -6  -5   21.31    8.10   0
   3  -6  -5  271.92    9.18   0
  -3   6   5  271.18    6.80   0
  -2   6   5 1014.87   11.29   0
   2  -6  -5  882.98    9.31   0
   1  -6  -5  276.79    6.96   0
  -1   6   5  264.51    6.84   0
   0  -6  -5  235.93    8.86   0
   0   6   5  220.17    6.75   0
  -1  -6  -5  545.10    9.88   0
   1   6   5  528.53    9.73   0
   2   6   5  369.98    9.37   0
  -2  -6  -5  373.24    9.31   0
  -3  -6  -5  631.42   11.17   0
   3   6   5  586.58    8.76   0
   4   6   5   38.36    6.81   0
  -4  -6  -5   47.20    6.61   0
  -5  -6  -5   29.04    6.82   0
   5   6   5   31.49    9.65   0
   6   6   5    3.84    7.53   0
  -6  -6  -5   -1.79    7.36   0
  -7  -6  -5    8.12    8.28   0
   7   6   5    6.04    8.28   0
  15  -7  -5   10.97   15.14   0
  15  -7  -5    5.75    8.26   0
  14  -7  -5   39.12   16.61   0
  14  -7  -5   51.15   11.19   0
  13  -7  -5   16.31    7.11   0
  12  -7  -5    6.00    6.87   0
  12  -7  -5    2.11    6.64   0
  11  -7  -5   12.43    9.27   0
  11  -7  -5   10.23    6.54   0
  10  -7  -5  298.85   10.27   0
  10  -7  -5  277.59    7.81   0
   9  -7  -5  164.56    9.33   0
   8  -7  -5  576.84   10.37   0
  -7   7   5 1145.47   20.23   0
   7  -7  -5  986.34   10.23   0
   6  -7  -5  265.02    7.19   0
  -6   7   5  310.85   13.39   0
  -5   7   5  746.11   10.61   0
  -5   7   5  759.89   13.62   0
   5  -7  -5  682.29   10.56   0
   4  -7  -5  103.93    6.28   0
  -4   7   5  111.60    6.10   0
   3  -7  -5   40.00    8.23   0
  -3   7   5   36.24    5.81   0
  -2   7   5    1.02    5.51   0
   2  -7  -5    8.35    5.69   0
  -1   7   5  118.71    6.40   0
   1  -7  -5  125.33    8.65   0
   0   7   5   42.66    6.05   0
   0  -7  -5   82.52    8.42   0
  -1  -7  -5  329.95    9.64   0
   1   7   5  304.90    7.37   0
  -2  -7  -5   70.63    9.12   0
   2   7   5   70.86    6.26   0
  -3  -7  -5  107.80    6.94   0
   3   7   5   95.70    6.54   0
   4   7   5  175.82    7.49   0
  -4  -7  -5  219.32   10.27   0
  -5  -7  -5  104.34    7.77   0
   5   7   5  104.61    7.84   0
  -6  -7  -5   82.38    8.66   0
   6   7   5   91.94    8.66   0
  15  -8  -5  110.16   12.30   0
  15  -8  -5   79.03    9.06   0
  14  -8  -5  164.83    8.55   0
  14  -8  -5  167.56    8.82   0
  13  -8  -5  254.60    8.52   0
  13  -8  -5  285.86   11.23   0
  12  -8  -5   21.56   10.05   0
  12  -8  -5   20.24   10.07   0
  11  -8  -5   29.01    9.82   0
  11  -8  -5   35.93    6.98   0
  10  -8  -5   -3.00    9.36   0
  10  -8  -5    1.95    9.08   0
   9  -8  -5   16.05    6.18   0
   8  -8  -5    0.97    6.29   0
  -7   8   5 1353.63   22.21   0
   7  -8  -5 1229.25   12.58   0
  -6   8   5  622.33   13.71   0
   6  -8  -5  522.07    8.20   0
  -5   8   5  876.08   11.03   0
  -5   8   5  851.08   14.22   0
   5  -8  -5  750.93    8.89   0
  -4   8   5  283.63    9.25   0
   4  -8  -5  241.02    9.34   0
   3  -8  -5   35.86    5.98   0
  -3   8   5   38.18    6.00   0
  -2   8   5  584.62   10.17   0
   2  -8  -5  550.58    8.15   0
  -1   8   5  147.39    8.81   0
   1  -8  -5  139.93    6.42   0
   0   8   5   29.93    6.09   0
   0  -8  -5   41.97    6.53   0
  -1  -8  -5  225.48    7.30   0
   1   8   5  245.23    7.04   0
   2   8   5  296.66   10.18   0
  -2  -8  -5  294.47   10.21   0
  -3  -8  -5   70.00    7.28   0
   3   8   5   71.29    7.27   0
  -4  -8  -5  116.53   10.62   0
   4   8   5  135.59   10.88   0
   5   8   5   58.00    8.22   0
  -5  -8  -5   63.60    8.13   0
  15  -9  -5   23.13    8.70   0
  15  -9  -5   39.49   12.09   0
  14  -9  -5   50.29    7.93   0
  14  -9  -5   56.79    8.24   0
  13  -9  -5  358.09   12.05   0
  13  -9  -5  289.13    9.06   0
  12  -9  -5  376.88    9.07   0
  12  -9  -5  359.30    8.76   0
  11  -9  -5  273.79    8.44   0
  11  -9  -5  273.44   10.80   0
  10  -9  -5   87.10    6.86   0
   9  -9  -5   26.63    9.01   0
   8  -9  -5  119.57    8.95   0
  -7   9   5   10.83    9.35   0
   7  -9  -5   15.62    6.12   0
  -6   9   5   10.21    9.16   0
   6  -9  -5   12.42    6.00   0
  -5   9   5  189.89    6.65   0
   5  -9  -5  172.27    6.70   0
   4  -9  -5  800.82    8.97   0
  -4   9   5  859.34   10.82   0
   3  -9  -5  150.58    6.60   0
  -3   9   5  138.54    6.60   0
  -2   9   5  391.88    7.54   0
   2  -9  -5  385.70    7.56   0
  -1   9   5  165.95    9.24   0
   1  -9  -5  156.72    6.95   0
   0   9   5  168.92    7.22   0
   0  -9  -5  173.46    9.66   0
   1   9   5  237.61   10.10   0
  -1  -9  -5  249.47   10.13   0
  -2  -9  -5    3.10    7.21   0
   2   9   5    5.08    7.07   0
  -3  -9  -5    9.98   10.56   0
   3   9   5    7.17    7.47   0
   4   9   5  158.53    8.62   0
  -4  -9  -5  158.80    8.62   0
  14 -10  -5   39.11   11.72   0
  14 -10  -5   47.33    8.58   0
  13 -10  -5   35.35   11.30   0
  13 -10  -5   51.44    7.94   0
  12 -10  -5  169.76    8.43   0
  12 -10  -5  137.56    8.15   0
  11 -10  -5  167.06    7.93   0
  11 -10  -5  194.57   10.71   0
  10 -10  -5  356.26   10.90   0
   9 -10  -5  160.33    7.46   0
   8 -10  -5   39.35    6.53   0
  -7  10   5    5.92   11.72   0
   7 -10  -5    4.95    6.19   0
   6 -10  -5    5.55    6.26   0
  -6  10   5    9.33    9.68   0
   5 -10  -5    2.52    6.19   0
   4 -10  -5  202.70    9.33   0
  -4  10   5  196.55    6.87   0
  -3  10   5  292.68    7.32   0
   3 -10  -5  266.30    7.46   0
   2 -10  -5  436.56    8.47   0
  -2  10   5  488.89   10.70   0
  -1  10   5  515.57    8.41   0
   1 -10  -5  491.28    8.34   0
   0  10   5   67.09    7.07   0
   0 -10  -5   65.62   10.10   0
   1  10   5  123.81   10.52   0
  -1 -10  -5  119.48    7.68   0
  -2 -10  -5    5.18   10.58   0
   2  10   5   16.15    7.66   0
  -3 -10  -5   43.36    8.38   0
   3  10   5   35.55    8.16   0
  14 -11  -5   11.45   11.96   0
  14 -11  -5   14.37    8.53   0
  13 -11  -5   10.59   11.33   0
  13 -11  -5   10.50    8.16   0
  12 -11  -5   77.57    8.08   0
  12 -11  -5   95.07   11.29   0
  11 -11  -5   33.62   10.27   0
  11 -11  -5   28.42   10.55   0
  10 -11  -5   77.61    7.85   0
   9 -11  -5  359.48    8.66   0
   8 -11  -5  207.68    7.55   0
  -7  11   5  274.93   14.92   0
   7 -11  -5  244.60    7.65   0
   6 -11  -5   17.65    6.60   0
  -6  11   5   22.13   10.19   0
   5 -11  -5   20.90    9.29   0
   4 -11  -5   -2.69    6.51   0
  -4  11   5   -0.46    6.47   0
  -3  11   5   10.43    9.45   0
   3 -11  -5    2.38    9.44   0
  -2  11   5    0.60    7.13   0
   2 -11  -5   -0.06    7.14   0
   1 -11  -5  132.37    7.72   0
  -1  11   5  120.49    7.48   0
   0 -11  -5  126.95    8.08   0
   0  11   5  127.44    7.84   0
  -1 -11  -5  177.42    8.62   0
   1  11   5  189.66    8.74   0
  13 -12  -5   60.62   12.40   0
  13 -12  -5   40.56    8.85   0
  12 -12  -5   10.59    8.11   0
  12 -12  -5   -4.27    8.30   0
  11 -12  -5   66.35    7.98   0
  11 -12  -5   47.36    8.13   0
  10 -12  -5   31.38    7.80   0
   9 -12  -5  186.88   10.74   0
   8 -12  -5   37.30    7.12   0
   7 -12  -5  260.71    8.18   0
  -7  12   5  282.51   15.68   0
  -6  12   5  425.22   14.19   0
   6 -12  -5  425.59    9.03   0
   5 -12  -5  272.73   10.81   0
  -4  12   5  128.78   10.44   0
   4 -12  -5  109.67    7.55   0
  -3  12   5    8.73    7.20   0
   3 -12  -5   15.67    7.35   0
  -2  12   5    5.88    7.22   0
   2 -12  -5    3.44   10.53   0
  -1  12   5   13.26    7.67   0
   1 -12  -5   16.86    7.55   0
   0 -12  -5   31.94    8.23   0
   0  12   5   38.14    8.24   0
  12 -13  -5   36.00    8.85   0
  12 -13  -5   53.70   12.06   0
  11 -13  -5    5.10    8.15   0
  10 -13  -5   13.33    7.86   0
   9 -13  -5   90.26   11.06   0
   8 -13  -5   93.41    8.11   0
  -7  13   5   50.71   14.37   0
   7 -13  -5   52.72    7.77   0
  -6  13   5  126.64   15.05   0
   6 -13  -5  131.59    8.11   0
   5 -13  -5   18.33    7.82   0
   4 -13  -5  189.52    8.59   0
  -3  13   5  102.59   11.50   0
   3 -13  -5  112.77   11.43   0
   2 -13  -5   19.13    8.44   0
  -2  13   5    7.97   11.66   0
  10 -14  -5   64.54   12.47   0
   9 -14  -5   31.02    8.71   0
   8 -14  -5   16.64   11.79   0
   7 -14  -5    7.99    8.26   0
  -7  14   5   11.75   15.18   0
   6 -14  -5  135.68    8.92   0
  -6  14   5  136.63   13.89   0
   5 -14  -5   44.76    8.69   0
  -1  16  -6   44.44   12.96   0
   1 -16   6   41.42   12.20   0
   2 -16   6   30.07   12.02   0
   2 -16   6   20.52   12.81   0
   3 -16   6   19.58    8.67   0
  -3  16  -6   25.20    9.03   0
   3 -16   6   34.66   12.29   0
  -4  16  -6  136.69   13.75   0
   4 -16   6  113.69    9.68   0
   4 -16   6  138.77   12.77   0
  -5  16  -6   80.53   13.48   0
   5 -16   6   56.94    9.14   0
   5 -16   6   73.55    9.13   0
   6 -16   6  155.99   13.10   0
   6 -16   6  161.82   13.29   0
   2  15  -6   81.95    9.24   0
  -2 -15   6   67.21   12.47   0
   1  15  -6   33.94   12.29   0
  -1 -15   6   42.54   11.60   0
   0 -15   6   55.97   11.40   0
   0  15  -6   37.21    8.70   0
  -1  15  -6   16.44    7.96   0
   1 -15   6   18.37   10.89   0
   2 -15   6   25.39    8.08   0
   2 -15   6   19.86   12.01   0
  -3  15  -6    4.27   11.36   0
   3 -15   6    7.99    8.20   0
   3 -15   6    6.43   11.02   0
   4 -15   6   76.18    8.45   0
  -4  15  -6   82.70    9.03   0
   4 -15   6   96.30   11.89   0
   5 -15   6   22.39   11.54   0
  -5  15  -6   21.38    8.48   0
   5 -15   6   22.54    8.48   0
   6 -15   6   80.65    9.04   0
   6 -15   6   73.17    9.18   0
   7 -15   6  151.77    9.62   0
   7 -15   6  177.46   12.78   0
   8 -15   6   39.00   12.41   0
   8 -15   6   30.54    9.07   0
  -3 -14   6   85.38   12.15   0
   3  14  -6   76.02    8.99   0
   2  14  -6   88.35   11.79   0
  -2 -14   6   68.41   11.40   0
   1  14  -6  103.72   11.47   0
  -1 -14   6  104.69    8.27   0
   0  14  -6   86.80   11.10   0
   0 -14   6   68.71    7.98   0
  -1  14  -6  288.20    9.30   0
   1 -14   6  253.94    8.79   0
   2 -14   6   29.73    7.88   0
   2 -14   6   40.05   10.48   0
  -2  14  -6   40.94   10.84   0
   3 -14   6    2.39   10.45   0
  -3  14  -6   -2.44   10.75   0
   3 -14   6    4.18   10.84   0
   4 -14   6   31.52   10.46   0
  -4  14  -6   50.76   10.95   0
   4 -14   6   39.92    7.82   0
   5 -14   6   64.63   11.45   0
   5 -14   6   76.55   11.50   0
   6 -14   6   29.11   11.20   0
   6 -14   6   20.45    7.84   0
   7 -14   6   85.50   11.91   0
   7 -14   6  103.30   11.96   0
   8 -14   6   36.90   12.02   0
   8 -14   6   51.60    8.58   0
   9 -14   6  126.04    9.28   0
  -5 -13   6   11.38   11.92   0
   5  13  -6   21.00   12.43   0
   4  13  -6    8.62   11.64   0
  -4 -13   6   14.06   10.99   0
   3  13  -6   58.98    8.28   0
  -3 -13   6   42.44    7.78   0
  -2 -13   6   60.00   10.45   0
   2  13  -6   69.39    8.21   0
   1  13  -6  339.68   11.73   0
  -1 -13   6  320.93   11.22   0
   0 -13   6   86.50    7.53   0
   0  13  -6   92.67   10.65   0
  -1  13  -6  113.53    7.98   0
   1 -13   6  104.94   10.16   0
  -2  13  -6   51.46    7.64   0
   2 -13   6   65.26   10.61   0
   2 -13   6   65.12    7.38   0
   3 -13   6   15.99   10.00   0
   3 -13   6   29.90   10.36   0
   4 -13   6  131.34   10.91   0
  -4  13  -6  177.82   11.62   0
   4 -13   6  143.06    8.35   0
   5 -13   6   26.17    7.27   0
   5 -13   6   32.71   10.39   0
   6 -13   6    6.48   10.57   0
   6 -13   6   14.08   10.38   0
   7 -13   6  127.38   11.21   0
   8 -13   6   94.18    8.31   0
   9 -13   6   49.95   11.51   0
  10 -13   6  168.62   12.90   0
  -6 -12   6  110.53   11.88   0
   6  12  -6  101.92    8.97   0
   5  12  -6   33.08    8.40   0
  -5 -12   6   39.20   10.82   0
   4  12  -6   13.57    7.56   0
  -4 -12   6   14.47   10.05   0
  -3 -12   6   59.92   10.29   0
   3  12  -6   59.57   10.54   0
   2  12  -6   34.02   10.22   0
  -2 -12   6   29.20    9.38   0
   1  12  -6   92.06    7.23   0
  -1 -12   6   72.52    7.03   0
   0  12  -6  347.47   11.23   0
   0 -12   6  291.67   10.92   0
   0 -12   6  284.59   11.72   0
  -1  12  -6  358.36   11.33   0
   1 -12   6  297.02    8.57   0
   2 -12   6  551.38    9.83   0
  -2  12  -6  705.72   12.84   0
   2 -12   6  602.09   12.79   0
   3 -12   6   63.24    9.68   0
   3 -12   6   58.99    9.99   0
  -4  12  -6  289.28   11.49   0
   4 -12   6  247.22   11.08   0
   4 -12   6  243.81    8.51   0
   5 -12   6  158.29   10.90   0
   5 -12   6  175.02    8.11   0
   6 -12   6   61.44    7.27   0
   7 -12   6   15.77    7.39   0
   8 -12   6   64.67   10.89   0
   9 -12   6   31.38    7.85   0
  10 -12   6   90.46   13.61   0
  10 -12   6  110.98    8.77   0
   7  11  -6   18.08    8.52   0
   7  11  -6    7.78   11.89   0
  -7 -11   6   14.16   11.22   0
  -6 -11   6  342.00   13.05   0
   6  11  -6  345.05   13.60   0
   6  11  -6  362.57   12.68   0
  -5 -11   6  244.41   11.53   0
   5  11  -6  247.48    8.93   0
   4  11  -6  344.94   11.31   0
  -4 -11   6  299.28   11.42   0
   3  11  -6   22.32    7.18   0
  -3 -11   6   23.35    9.25   0
   2  11  -6   41.38    9.98   0
  -2 -11   6   27.83    9.25   0
   1  11  -6  102.57    9.74   0
  -1 -11   6  103.03    9.68   0
   0 -11   6   28.11    9.67   0
   0 -11   6   17.73    6.31   0
   0  11  -6   23.38    6.72   0
   1 -11   6    4.89    8.80   0
  -1  11  -6   -2.59    9.34   0
  -2  11  -6  526.13    9.82   0
   2 -11   6  479.86   11.99   0
   2 -11   6  453.16   11.74   0
   3 -11   6  373.79   11.02   0
   3 -11   6  335.68    8.58   0
  -4  11  -6  249.56   10.79   0
   4 -11   6  215.02   10.26   0
   5 -11   6  311.61    8.53   0
   6 -11   6   88.07    9.55   0
   7 -11   6  246.27    9.63   0
   7 -11   6  251.07    8.34   0
   8 -11   6   23.59    7.86   0
   8 -11   6   38.22   10.47   0
   9 -11   6    5.78   10.95   0
   9 -11   6   15.83   10.64   0
  10 -11   6    8.88   11.70   0
  10 -11   6   12.58    7.91   0
  11 -11   6   60.59    8.97   0
  11 -11   6   64.09   13.41   0
  -8 -10   6   26.62   11.49   0
   8  10  -6   31.33   11.59   0
   7  10  -6    2.47   10.39   0
  -7 -10   6    4.18   10.28   0
   6  10  -6   94.47    7.77   0
  -6 -10   6   88.10   10.38   0
   6  10  -6   96.69   10.76   0
   5  10  -6   97.75    7.41   0
  -5 -10   6   75.68    9.92   0
  -4 -10   6  396.43   11.54   0
   4  10  -6  406.40    8.66   0
   3  10  -6  491.06    8.83   0
  -3 -10   6  440.08   11.44   0
   2  10  -6  273.52    7.72   0
  -2 -10   6  268.27   10.25   0
   1  10  -6  336.27    8.30   0
  -1 -10   6  271.22    8.04   0
   0  10  -6   23.06    6.46   0
   0 -10   6   28.21    9.22   0
   0 -10   6   20.42    6.12   0
  -1  10  -6   51.46    6.78   0
   1 -10   6   64.22    6.64   0
  -2  10  -6  123.11    7.21   0
   2 -10   6  124.70    9.68   0
   2 -10   6  122.71    9.57   0
   3 -10   6  125.39    7.57   0
   4 -10   6   95.54    9.59   0
   5 -10   6  803.51   12.20   0
   5 -10   6  760.70   12.14   0
   6 -10   6  368.45   12.44   0
   6 -10   6  308.39    8.30   0
   7 -10   6  306.13   12.52   0
   7 -10   6  287.08    8.54   0
   8 -10   6  132.87   11.23   0
   8 -10   6  127.55   10.40   0
   9 -10   6   18.15   11.01   0
   9 -10   6   23.56   10.45   0
  10 -10   6  122.53    8.70   0
  10 -10   6  144.43   12.80   0
  11 -10   6   -0.31    8.24   0
  11 -10   6   -4.23   12.60   0
   9   9  -6   91.79   11.94   0
  -9  -9   6   96.19   12.06   0
   8   9  -6   11.55   10.46   0
  -8  -9   6   12.64    7.46   0
   7   9  -6    5.30   10.06   0
  -7  -9   6    6.57    9.69   0
  -6  -9   6   55.17    9.68   0
   6   9  -6   51.95    9.84   0
  -5  -9   6  174.57   10.28   0
   5   9  -6  178.17   10.92   0
   5   9  -6  192.53   10.21   0
   4   9  -6    6.39    6.39   0
  -4  -9   6   -0.10   10.17   0
   3   9  -6  156.52    9.54   0
  -3  -9   6  138.30    9.36   0
  -2  -9   6   26.70    8.51   0
   2   9  -6   24.67    9.21   0
   1   9  -6  532.76    8.88   0
  -1  -9   6  440.19   12.34   0
  -1  -9   6  470.83   11.35   0
   0   9  -6  398.46   10.59   0
   0  -9   6  325.95    8.65   0
   0  -9   6  321.10    9.08   0
  -1   9  -6   67.25    7.13   0
   1  -9   6   66.92    9.08   0
  -2   9  -6   29.31    6.64   0
   2  -9   6   22.14    9.38   0
  -3   9  -6   16.57    6.69   0
   3  -9   6    9.12    9.33   0
   3  -9   6    4.44    8.94   0
   4  -9   6   77.28    9.88   0
   4  -9   6   67.36    9.24   0
   5  -9   6   42.68    7.03   0
   5  -9   6   40.01    6.35   0
   6  -9   6  255.08   11.36   0
   6  -9   6  208.29    7.55   0
   7  -9   6  338.46    9.54   0
   7  -9   6  340.45   10.53   0
   8  -9   6  380.93    9.89   0
   8  -9   6  364.76   11.07   0
   9  -9   6   23.93    7.88   0
   9  -9   6   18.01    7.26   0
  10  -9   6  118.25   12.36   0
  10  -9   6   88.33    8.28   0
  11  -9   6   36.88    9.05   0
  11  -9   6   43.29    8.28   0
 -10  -8   6   16.31   11.73   0
  10   8  -6   12.72   11.42   0
  -9  -8   6   45.21   11.28   0
   9   8  -6   51.35   10.93   0
   8   8  -6   96.19   10.56   0
  -8  -8   6   99.64   10.84   0
   7   8  -6  169.27   12.56   0
  -7  -8   6  157.03   10.54   0
   6   8  -6  161.76   10.23   0
  -6  -8   6  158.07   10.16   0
   5   8  -6   59.86    6.61   0
  -5  -8   6   50.96    8.77   0
   5   8  -6   54.39    9.26   0
   4   8  -6   20.99    8.97   0
  -4  -8   6   17.20   10.27   0
  -3  -8   6  158.30   11.90   0
   3   8  -6  172.23    7.16   0
   2   8  -6  375.94   10.39   0
  -2  -8   6  319.07   11.14   0
   1   8  -6  375.22   10.50   0
  -1  -8   6  307.96   11.50   0
  -1  -8   6  308.19   10.53   0
   0   8  -6 2103.43   15.88   0
   0  -8   6 1704.66   16.53   0
   0  -8   6 1668.55   15.94   0
  -1   8  -6  880.29   12.47   0
  -2   8  -6  820.52   10.79   0
   2  -8   6  814.02   10.94   0
   2  -8   6  744.27   10.47   0
  -3   8  -6  199.91    7.94   0
   3  -8   6  187.73    7.60   0
   3  -8   6  180.16    7.17   0
   4  -8   6   31.65    9.60   0
   4  -8   6   33.67    8.66   0
   5  -8   6    9.25    9.37   0
   5  -8   6    5.20    6.25   0
   6  -8   6   76.81    7.37   0
   6  -8   6   68.09    6.45   0
   7  -8   6   25.05    9.93   0
   7  -8   6   13.02    6.60   0
   8  -8   6  197.56    7.55   0
   8  -8   6  202.25   11.45   0
  -8   8  -6  186.39    7.51   0
   9  -8   6  225.88    8.43   0
  -9   8  -6  242.11    8.16   0
   9  -8   6  243.71   11.92   0
  10  -8   6  211.51    8.52   0
  10  -8   6  243.47    9.92   0
 -10   8  -6  223.93    8.81   0
  11  -8   6  163.52    9.06   0
  11  -8   6  193.02   13.40   0
  11   7  -6   76.47   12.17   0
 -11  -7   6   56.19   12.51   0
  10   7  -6  104.77   11.33   0
 -10  -7   6  100.42   11.56   0
   9   7  -6  185.60   11.27   0
  -9  -7   6  151.15    8.79   0
   8   7  -6  190.95   10.72   0
  -8  -7   6  206.28   11.04   0
  -7  -7   6   45.07    9.23   0
   7   7  -6   47.99    9.56   0
   6   7  -6  344.42   11.81   0
  -6  -7   6  365.09   11.74   0
  -5  -7   6   86.06   11.02   0
   5   7  -6   86.50   11.56   0
   5   7  -6   93.98    6.67   0
   4   7  -6  207.60    7.13   0
  -4  -7   6  166.99   10.35   0
   3   7  -6    3.92    5.96   0
  -3  -7   6    3.19    9.80   0
  -2  -7   6  599.57   15.16   0
   2   7  -6  671.40   10.15   0
  -2  -7   6  630.51   16.41   0
  -1  -7   6  285.40   10.74   0
  -1  -7   6  293.45   11.56   0
   1   7  -6  336.30   10.12   0
   0   7  -6  642.85    9.66   0
   0  -7   6  552.30   13.42   0
   0  -7   6  576.07   13.23   0
  -1   7  -6  200.11    9.81   0
   1  -7   6  190.64    7.66   0
   2  -7   6  169.92   10.05   0
  -2   7  -6  163.93    9.94   0
   2  -7   6  160.00    8.93   0
   3  -7   6 1239.17   12.64   0
   3  -7   6 1054.69   11.29   0
  -4   7  -6  113.02    6.84   0
   4  -7   6   98.37    6.68   0
   4  -7   6  133.72    7.23   0
   5  -7   6  187.17    8.05   0
  -5   7  -6  169.95    7.03   0
   5  -7   6  171.61    7.10   0
   6  -7   6   60.89    6.95   0
  -6   7  -6   73.52    9.21   0
   6  -7   6   51.92    7.08   0
   7  -7   6   56.50    7.27   0
  -7   7  -6   58.70    6.65   0
   7  -7   6   47.94    6.70   0
   8  -7   6   -1.16    6.72   0
   8  -7   6   -3.27    7.29   0
  -8   7  -6    1.81    6.52   0
   9  -7   6   56.19    7.93   0
  -9   7  -6   63.86    6.99   0
   9  -7   6   68.17    9.93   0
 -10   7  -6   80.99   10.95   0
  10  -7   6   54.51    8.66   0
  10  -7   6   74.62   10.81   0
  11  -7   6  233.64    9.43   0
  11  -7   6  270.01   13.76   0
 -11   7  -6  272.45    9.52   0
  12   6  -6   10.70   12.11   0
 -12  -6   6    9.12   12.87   0
  11   6  -6    6.03   10.95   0
 -11  -6   6    0.55   11.32   0
  10   6  -6   37.79    7.49   0
 -10  -6   6   49.41   10.73   0
   9   6  -6   35.52    9.60   0
  -9  -6   6   42.45   10.31   0
   8   6  -6  305.95   11.14   0
  -8  -6   6  317.49   11.71   0
   7   6  -6  182.24   10.08   0
  -7  -6   6  203.63   10.44   0
   6   6  -6  328.51    7.91   0
   6   6  -6  298.68   11.65   0
  -6  -6   6  325.44   13.64   0
   5   6  -6  512.13    8.63   0
  -5  -6   6  472.90   15.68   0
   5   6  -6  466.42   15.83   0
   4   6  -6  222.76    7.23   0
  -4  -6   6  212.92   15.13   0
   3   6  -6  634.17   11.10   0
  -3  -6   6  521.60   20.62   0
  -3  -6   6  548.96   22.73   0
   2   6  -6   49.82    6.24   0
  -2  -6   6   32.13    8.26   0
  -2  -6   6   38.83    9.19   0
  -1  -6   6   27.04    8.49   0
   1   6  -6   26.64    6.18   0
  -1  -6   6   25.26   10.47   0
   0  -6   6  273.61    9.99   0
   0  -6   6  249.63   10.12   0
   0   6  -6  277.68    7.61   0
  -1   6  -6  894.88   10.73   0
   1  -6   6  873.59   10.88   0
  -2   6  -6   50.37    6.42   0
   2  -6   6   55.26    9.26   0
  -2   6  -6   58.20    6.79   0
   2  -6   6   55.75    7.98   0
   3  -6   6  919.68   14.06   0
  -3   6  -6  775.06   10.42   0
   3  -6   6  812.85   10.64   0
   4  -6   6  270.18    7.52   0
   4  -6   6  313.23    8.66   0
  -4   6  -6  320.50    9.99   0
   5  -6   6 1035.79   12.15   0
   5  -6   6 1105.27   14.72   0
  -5   6  -6 1038.09   12.44   0
   6  -6   6 1041.25   14.04   0
  -6   6  -6  926.93    9.98   0
   6  -6   6  926.69   10.12   0
   7  -6   6   37.90    6.39   0
   7  -6   6   54.73   10.31   0
  -7   6  -6   47.14    6.30   0
   8  -6   6   82.90    9.42   0
   8  -6   6   67.82    7.81   0
  -8   6  -6   88.58    9.31   0
   9  -6   6   29.44    7.14   0
   9  -6   6   20.64    7.78   0
  -9   6  -6   35.59    7.14   0
  10  -6   6    3.82    7.32   0
  10  -6   6   24.48   11.46   0
 -10   6  -6   14.95    7.62   0
  11  -6   6   21.33   11.55   0
  11  -6   6    7.21    8.79   0
 -11   6  -6   13.19   11.46   0
 -12  -5   6   84.61    9.13   0
  12   5  -6   88.44   11.72   0
 -11  -5   6  110.95   11.50   0
  11   5  -6  113.25   10.81   0
 -10  -5   6   40.46   10.32   0
  10   5  -6   35.08    9.70   0
  -9  -5   6   48.92    9.76   0
   9   5  -6   32.97    6.61   0
  -8  -5   6    0.37    8.63   0
   8   5  -6    3.59    8.58   0
   7   5  -6  184.01   10.05   0
  -7  -5   6  184.89   10.59   0
   6   5  -6  661.13    9.29   0
   6   5  -6  574.65   14.41   0
  -6  -5   6  633.38   16.88   0
   5   5  -6 1689.43   12.61   0
  -5  -5   6 1516.77   31.45   0
   5   5  -6 1496.65   30.14   0
   4   5  -6  549.06    9.47   0
   3   5  -6  313.78    7.77   0
  -2  -5   6  246.73   15.19   0
   2   5  -6  279.37   10.11   0
  -2  -5   6  233.33   15.11   0
  -1  -5   6 1135.01   17.21   0
  -1  -5   6 1294.24   13.54   0
   1   5  -6 1273.79   11.92   0
   0  -5   6  929.16   12.42   0
   0   5  -6  875.14   10.56   0
   0  -5   6  808.76   13.47   0
   1  -5   6   12.50    8.68   0
  -1   5  -6    8.70    6.11   0
  -1   5  -6    5.94    8.27   0
   2  -5   6  157.12    7.84   0
  -2   5  -6  178.78    9.23   0
   2  -5   6  187.55    9.26   0
   3  -5   6  963.87   12.12   0
  -3   5  -6  897.16   10.47   0
   3  -5   6  997.60   13.76   0
   4  -5   6  398.54    8.33   0
   4  -5   6  427.23   12.27   0
  -4   5  -6  393.48    7.97   0
   5  -5   6  420.01    8.28   0
   5  -5   6  482.84   11.56   0
  -5   5  -6  424.20    7.96   0
   6  -5   6  831.38   11.64   0
   6  -5   6  817.81   11.37   0
  -6   5  -6  794.56    9.41   0
   7  -5   6  106.94    6.67   0
   7  -5   6  129.43   10.59   0
  -7   5  -6  126.98    6.73   0
   8  -5   6  326.86   10.66   0
  -8   5  -6  376.48   10.66   0
   8  -5   6  308.69    9.14   0
   9  -5   6   51.04    7.04   0
  -9   5  -6   51.12    6.90   0
  10  -5   6   -1.36   10.49   0
 -10   5  -6    9.53    7.49   0
  11  -5   6   -5.81    8.35   0
 -11   5  -6    4.11   11.61   0
  13   4  -6  101.52   12.49   0
 -12  -4   6  112.54   12.24   0
  12   4  -6  120.77   11.56   0
 -11  -4   6  472.38   13.11   0
  11   4  -6  463.27   12.58   0
 -10  -4   6   92.43   10.22   0
  10   4  -6   75.63    7.12   0
  -9  -4   6    1.10    6.80   0
   9   4  -6   -2.02    6.37   0
  -8  -4   6   15.70    9.07   0
   8   4  -6   15.73    8.49   0
   7   4  -6   -1.33    6.25   0
  -7  -4   6    5.63   11.02   0
   7   4  -6    4.99    8.51   0
   6   4  -6   37.82    6.38   0
   6   4  -6   35.93   10.48   0
   5   4  -6  753.95   11.70   0
   4   4  -6 1724.66   13.27   0
   3   4  -6 1688.60   14.59   0
   2   4  -6 1762.49   13.64   0
  -2  -4   6 1400.59   28.91   0
  -2  -4   6 1736.93   13.60   0
  -1  -4   6  418.86    8.78   0
   1   4  -6  447.08   10.84   0
   1   4  -6  393.10   12.61   0
  -1  -4   6  382.16   11.55   0
   0  -4   6  715.50   12.11   0
   0   4  -6  740.10   12.01   0
   0   4  -6  670.83   12.89   0
   1  -4   6  616.09   11.59   0
   1  -4   6  498.96    8.95   0
  -1   4  -6  577.03   11.27   0
   2  -4   6  355.04   10.97   0
   2  -4   6  351.60    9.67   0
  -2   4  -6  369.81    9.83   0
   3  -4   6    3.21    5.52   0
   3  -4   6  -13.94    7.02   0
  -3   4  -6    5.23    5.55   0
   4  -4   6  265.58    7.37   0
   4  -4   6  293.06   10.91   0
  -4   4  -6  290.30    9.09   0
   5  -4   6  283.33    7.30   0
   5  -4   6  299.01    8.84   0
  -5   4  -6  301.87    7.28   0
  -6   4  -6  442.83   10.02   0
   6  -4   6  384.23    7.79   0
  -7   4  -6   80.42    8.94   0
   7  -4   6   60.01    6.64   0
   8  -4   6  152.50    7.00   0
  -8   4  -6  165.65    9.48   0
   9  -4   6  464.69   11.39   0
  -9   4  -6  449.15    8.67   0
  10  -4   6   58.66    7.79   0
 -10   4  -6   71.52    7.84   0
  11  -4   6   97.07   12.38   0
 -11   4  -6  127.07   12.38   0
  13   3  -6   19.07   11.24   0
  12   3  -6    9.65    7.49   0
 -11  -3   6  131.41    8.23   0
  11   3  -6  140.37   10.42   0
 -10  -3   6  637.47   13.34   0
  10   3  -6  662.98   12.80   0
   9   3  -6  171.91    9.66   0
  -9  -3   6  165.22   10.47   0
   8   3  -6  701.71    9.49   0
   8   3  -6  678.89   12.79   0
   7   3  -6  157.11    9.27   0
   7   3  -6  144.76    9.38   0
   6   3  -6  153.98    7.01   0
   6   3  -6   95.33    9.43   0
   5   3  -6  575.71    8.93   0
   4   3  -6   54.06    7.50   0
  -3  -3   6   84.84    9.01   0
   3   3  -6   79.30    6.59   0
  -2  -3   6  429.86   14.49   0
   2   3  -6  484.84   11.03   0
  -2  -3   6  496.80   10.92   0
   2   3  -6  440.68   15.52   0
  -1  -3   6  951.83   11.23   0
  -1  -3   6  871.30   14.33   0
   1   3  -6  943.30   11.25   0
   1   3  -6  878.86   14.86   0
   0  -3   6  606.75   12.29   0
   0   3  -6  526.82    9.47   0
   0   3  -6  566.34   11.49   0
   1  -3   6 1623.78   13.99   0
   1  -3   6 1486.74   13.05   0
  -1   3  -6 1671.77   14.70   0
   2  -3   6    4.35    5.69   0
   2  -3   6  -18.90    7.31   0
  -2   3  -6    7.68    5.33   0
   3  -3   6  102.65    8.29   0
   3  -3   6  102.79    7.57   0
  -3   3  -6  104.46    6.11   0
   4  -3   6   52.85    5.77   0
  -4   3  -6   46.93    6.04   0
   5  -3   6    0.47    8.16   0
  -5   3  -6    5.95    5.68   0
   6  -3   6   35.12    5.96   0
  -6   3  -6   59.51    8.30   0
   7  -3   6  290.03    7.37   0
  -7   3  -6  325.12    9.54   0
   8  -3   6  232.16    7.67   0
  -8   3  -6  245.40    7.46   0
  -9   3  -6  255.78   10.66   0
   9  -3   6  239.39   10.60   0
  10  -3   6   46.96    7.76   0
 -10   3  -6   50.82    7.94   0
  11  -3   6   84.13    9.06   0
 -11   3  -6   80.61   12.39   0
  14   2  -6   20.24   11.91   0
  13   2  -6    7.86   10.99   0
  12   2  -6  113.13   10.77   0
  11   2  -6   32.24    9.39   0
  10   2  -6  203.61    9.96   0
   9   2  -6   65.93    6.79   0
   9   2  -6   63.71    8.56   0
   8   2  -6  515.82   11.41   0
   8   2  -6  431.97    9.43   0
   7   2  -6 1379.53   14.13   0
   7   2  -6 1251.37   16.65   0
   6   2  -6  317.01   11.31   0
   6   2  -6  363.93    9.98   0
   5   2  -6  420.28    8.52   0
   5   2  -6  372.00   14.55   0
   5   2  -6  370.95   14.74   0
  -4  -2   6  332.34    8.08   0
   4   2  -6  320.04    8.11   0
   4   2  -6  281.37   15.91   0
   4   2  -6  276.17   15.41   0
   3   2  -6   15.80    6.55   0
   3   2  -6    7.67    9.27   0
  -3  -2   6    8.63    7.88   0
  -3  -2   6    6.67    6.34   0
  -2  -2   6   46.49    6.45   0
   2   2  -6   48.15    9.06   0
   2   2  -6   41.99    8.36   0
  -2  -2   6   38.60    8.46   0
   1   2  -6  554.06   10.34   0
  -1  -2   6  640.10   10.48   0
   1   2  -6  653.00   12.28   0
   0   2  -6  730.08   11.45   0
   0  -2   6  768.66   12.53   0
   0  -2   6  726.87   11.34   0
  -1   2  -6 4860.68   21.96   0
   1  -2   6 5170.80   24.55   0
   1  -2   6 4491.56   20.35   0
   2  -2   6  852.63   11.22   0
   2  -2   6  885.90   13.29   0
  -2   2  -6  844.30   11.08   0
   3  -2   6  478.53    7.82   0
  -3   2  -6  471.69    7.76   0
   4  -2   6  697.13    8.77   0
  -4   2  -6  735.72    8.78   0
   5  -2   6  108.60    6.15   0
  -5   2  -6  116.34    8.30   0
   6  -2   6  328.05    9.32   0
  -6   2  -6  329.68    9.28   0
  -7   2  -6    3.99    6.03   0
   7  -2   6   22.63    8.72   0
   8  -2   6   82.97    6.93   0
  -8   2  -6  111.66    6.89   0
   9  -2   6  141.29   10.43   0
  -9   2  -6  148.07   10.29   0
  10  -2   6   86.94   11.47   0
 -10   2  -6   83.91    8.19   0
  14   1  -6   42.48    8.76   0
  14   1  -6   31.88   11.88   0
  13   1  -6  151.53    8.44   0
  12   1  -6    7.51    9.81   0
  11   1  -6   26.79    7.03   0
  11   1  -6   21.23    6.65   0
  10   1  -6  284.34   10.21   0
  10   1  -6  232.52    7.89   0
   9   1  -6   57.89    6.58   0
   9   1  -6   62.67    6.97   0
   8   1  -6   49.14    9.40   0
   8   1  -6   25.41    6.13   0
   7   1  -6  344.44    7.91   0
   7   1  -6  298.47    8.88   0
   6   1  -6  294.98    9.82   0
   6   1  -6  259.06   10.88   0
   6   1  -6  265.52   10.91   0
   5   1  -6 1690.09   20.18   0
   5   1  -6 1821.19   22.54   0
   5   1  -6 1884.66   14.30   0
   4   1  -6   99.76    8.87   0
   4   1  -6  111.83    6.67   0
  -4  -1   6  119.54    7.01   0
  -3  -1   6  281.86    9.91   0
   3   1  -6  262.50   10.07   0
  -3  -1   6  241.00   10.29   0
   3   1  -6  232.87   10.08   0
   2   1  -6   95.49    8.80   0
  -2  -1   6   97.75    6.90   0
   2   1  -6  100.82    9.39   0
   1   1  -6  120.37    8.21   0
  -1  -1   6  119.46    7.25   0
   0   1  -6   15.97    7.46   0
   0  -1   6   44.53    9.67   0
   0  -1   6   21.81    7.23   0
  -1   1  -6  645.64    8.89   0
   1  -1   6  697.95   10.50   0
   1  -1   6  644.08    8.79   0
  -2   1  -6  742.75    8.95   0
   2  -1   6  763.55    9.14   0
  -3   1  -6  269.07    6.66   0
   3  -1   6  268.28    6.91   0
   4  -1   6 1722.72   13.34   0
  -4   1  -6 1748.13   13.09   0
   5  -1   6   55.93    8.29   0
  -5   1  -6   50.77    5.92   0
   6  -1   6  133.81    6.51   0
  -6   1  -6  129.16    6.42   0
   7  -1   6   79.27    8.95   0
  -7   1  -6   98.15    6.47   0
   8  -1   6    1.41    6.50   0
  -8   1  -6    3.92    6.65   0
   9  -1   6    5.03    7.07   0
  -9   1  -6   16.66    9.96   0
  10  -1   6   69.70    8.70   0
 -10   1  -6   87.79   11.77   0
  14   0  -6   21.89    8.24   0
  14   0  -6   19.25    8.09   0
  13   0  -6   53.20    7.89   0
  13   0  -6   50.31    7.60   0
  12   0  -6   97.71    7.59   0
  12   0  -6  101.50    7.42   0
  11   0  -6   40.40    9.53   0
  11   0  -6   23.97    6.88   0
  10   0  -6   32.11    8.97   0
  10   0  -6   31.54    9.36   0
   9   0  -6   50.97    6.67   0
   9   0  -6   35.27    6.65   0
   8   0  -6  459.80   10.89   0
   8   0  -6  395.64    9.13   0
   7   0  -6  910.29   11.20   0
   7   0  -6  845.52   14.08   0
   6   0  -6 1548.50   16.98   0
   6   0  -6 1501.41   17.57   0
   6   0  -6 1604.60   13.92   0
   5   0  -6  464.12   11.31   0
  -5   0   6  517.40    8.75   0
   5   0  -6  509.77   10.73   0
   4   0  -6 1181.58   12.35   0
   4   0  -6  989.03   13.02   0
  -4   0   6 1263.78   12.41   0
  -4   0   6 1144.42   15.39   0
  -3   0   6  723.79   10.68   0
   3   0  -6  704.21   12.81   0
   3   0  -6  652.17   12.22   0
  -2   0   6  881.37   12.26   0
   2   0  -6  889.59   12.39   0
  -2   0   6  957.58   12.91   0
  -1   0   6  177.27    6.59   0
  -1   0   6  198.87    8.11   0
   1   0  -6  190.29    6.66   0
   0   0   6   29.87    6.85   0
   0   0  -6   31.12    7.18   0
   0   0   6   27.38    7.37   0
  -1   0  -6  199.02    8.51   0
   1   0   6  195.32    8.28   0
   2   0   6    8.46    5.36   0
  -2   0  -6   13.73    5.46   0
  -3   0  -6   27.03    5.74   0
   3   0   6   25.43    5.63   0
  -4   0  -6  738.09    8.64   0
   4   0   6  732.33    8.65   0
   5   0   6  471.51    7.82   0
  -5   0  -6  450.55    7.73   0
   6   0   6  331.67    7.46   0
  -6   0  -6  346.39    9.76   0
   7   0   6  338.11   10.12   0
  -7   0  -6  328.90    7.74   0
   8   0   6    2.90    6.80   0
  -8   0  -6   13.76    6.57   0
   9   0   6   92.86    7.97   0
  -9   0  -6   94.80    8.16   0
  15  -1  -6  106.61    9.54   0
  15  -1  -6  102.30    9.60   0
  14  -1  -6  138.11   12.05   0
  14  -1  -6  134.95   11.56   0
  13  -1  -6  118.99    7.95   0
  13  -1  -6  146.88   10.87   0
  12  -1  -6  362.66    9.33   0
  12  -1  -6  344.66    9.27   0
  11  -1  -6   52.17    6.98   0
  11  -1  -6   54.41    7.20   0
  10  -1  -6  550.38   11.53   0
  10  -1  -6  474.26    9.22   0
   9  -1  -6  424.38   11.12   0
   9  -1  -6  361.46    9.06   0
   8  -1  -6   92.35    9.60   0
   8  -1  -6   79.27    7.63   0
   7  -1  -6   -3.45    5.74   0
   7  -1  -6   -1.04    5.62   0
   7  -1  -6    0.58    8.68   0
   6  -1  -6 1141.37   12.45   0
   6  -1  -6 1098.32   13.80   0
   5  -1  -6  278.83    8.06   0
  -5   1   6  296.48    9.63   0
   5  -1  -6  275.44    9.46   0
  -4   1   6  624.85   11.36   0
   4  -1  -6  459.68    8.82   0
   4  -1  -6  541.41   11.93   0
   3  -1  -6  955.24   12.35   0
  -3   1   6 1056.06   13.17   0
  -3   1   6  885.59   10.81   0
  -2   1   6  546.90   11.55   0
  -2   1   6  520.96   10.01   0
   2  -1  -6  522.68    9.95   0
  -1   1   6 1825.30   13.15   0
  -1   1   6 2086.02   16.53   0
   1  -1  -6 1970.29   14.67   0
   0  -1  -6  340.77    9.12   0
   0   1   6  337.07    7.24   0
  -1  -1  -6   23.87    7.63   0
   1   1   6   24.81    5.35   0
  -2  -1  -6   13.21    5.57   0
   2   1   6   14.25    5.48   0
  -3  -1  -6   20.29    7.85   0
   3   1   6   16.34    8.01   0
  -4  -1  -6  184.15    8.79   0
   4   1   6  173.00    6.54   0
  -5  -1  -6  208.06    6.73   0
   5   1   6  232.32    8.92   0
   6   1   6  229.16    9.24   0
  -6  -1  -6  225.81    6.87   0
   7   1   6  524.73   11.15   0
  -7  -1  -6  500.13    8.45   0
   8   1   6  174.60    8.07   0
  -8  -1  -6  180.00   10.87   0
   9   1   6   83.30    8.17   0
  -9  -1  -6   80.38    8.07   0
  15  -2  -6    8.37    8.53   0
  15  -2  -6    5.01    8.13   0
  14  -2  -6   20.93    7.92   0
  14  -2  -6   13.30   10.98   0
  13  -2  -6   -1.20   10.24   0
  13  -2  -6    7.67    7.02   0
  12  -2  -6  832.52   13.69   0
  12  -2  -6  720.43   10.89   0
  11  -2  -6  475.27   10.09   0
  11  -2  -6  437.19    9.51   0
  10  -2  -6  657.18   12.03   0
  10  -2  -6  675.14   10.59   0
   9  -2  -6  397.62    9.38   0
   9  -2  -6  360.96    8.85   0
   8  -2  -6   23.85    8.31   0
   8  -2  -6   14.37    6.21   0
   8  -2  -6   23.00    6.31   0
   7  -2  -6  672.78   10.42   0
   7  -2  -6  632.91   11.17   0
   6  -2  -6    6.36    8.65   0
   6  -2  -6   16.64    5.61   0
  -6   2   6   11.55    8.18   0
  -5   2   6   78.53    8.73   0
   5  -2  -6   60.66    9.44   0
   5  -2  -6   20.64    5.69   0
  -4   2   6 2006.97   16.59   0
  -4   2   6 1728.25   13.63   0
   4  -2  -6 1673.67   13.60   0
  -3   2   6 2419.90   18.22   0
   3  -2  -6 1757.41   13.46   0
  -3   2   6 1800.41   13.47   0
  -2   2   6  366.93    8.39   0
  -2   2   6  353.44    7.44   0
   2  -2  -6  386.00    9.31   0
  -1   2   6 1692.32   13.46   0
   1  -2  -6 1579.58   12.01   0
   0   2   6 1442.29   12.32   0
   0  -2  -6 1361.08   11.03   0
   1   2   6 1089.36   11.44   0
  -1  -2  -6  901.45    9.44   0
  -2  -2  -6 1156.71    9.98   0
   2   2   6 1244.76   11.75   0
  -3  -2  -6   -1.14    7.99   0
   3   2   6    4.87    5.67   0
  -4  -2  -6   36.05    8.19   0
   4   2   6   22.42    5.93   0
  -5  -2  -6  130.07    9.05   0
   5   2   6  142.50    9.08   0
  -6  -2  -6   35.87    6.53   0
   6   2   6   37.26    9.12   0
   7   2   6   36.89    9.86   0
  -7  -2  -6   41.11    7.15   0
   8   2   6  105.23    7.88   0
  -8  -2  -6  104.84    7.93   0
  15  -3  -6   10.58   12.38   0
  15  -3  -6    8.89   12.06   0
  14  -3  -6    2.72   11.04   0
  14  -3  -6    1.65    7.69   0
  13  -3  -6   43.03    7.60   0
  13  -3  -6   47.52   10.46   0
  12  -3  -6   13.67    9.78   0
  12  -3  -6    7.75   10.01   0
  11  -3  -6  244.15   10.88   0
  11  -3  -6  204.63    7.91   0
  10  -3  -6  324.68    9.15   0
  10  -3  -6  321.86   10.41   0
   9  -3  -6  671.46   10.10   0
   9  -3  -6  769.99   13.54   0
   9  -3  -6  663.14   10.28   0
   8  -3  -6  160.76   10.19   0
   8  -3  -6  135.29    7.19   0
   8  -3  -6  141.86    8.94   0
   7  -3  -6  456.29   11.74   0
   7  -3  -6  389.28    8.37   0
   6  -3  -6  599.51   10.86   0
   6  -3  -6  574.96   10.77   0
  -6   3   6  628.25   10.26   0
  -5   3   6  803.97    9.92   0
  -5   3   6  929.11   13.21   0
   5  -3  -6  848.51   11.55   0
  -4   3   6 1111.58   13.79   0
  -4   3   6 1038.73   12.03   0
   4  -3  -6 1024.16   11.99   0
  -3   3   6   15.02    6.21   0
  -3   3   6    4.44    7.55   0
   3  -3  -6    4.44    5.48   0
  -2   3   6   33.39    7.69   0
   2  -3  -6   29.85    7.81   0
   1  -3  -6  601.57    8.31   0
  -1   3   6  619.99    8.35   0
   0   3   6  758.28   10.40   0
   0  -3  -6  827.94   10.69   0
   1   3   6   79.46    8.07   0
  -1  -3  -6   81.16    8.14   0
   2   3   6  850.32   10.57   0
  -2  -3  -6  829.38   10.39   0
  -3  -3  -6  229.72    6.61   0
   3   3   6  216.63    6.64   0
  -4  -3  -6  410.88    7.50   0
   4   3   6  424.51    7.64   0
  -5  -3  -6  133.50    6.65   0
   5   3   6  167.92    9.46   0
  -6  -3  -6   10.69    6.75   0
   6   3   6   21.19    9.47   0
   7   3   6   15.79   10.21   0
  -7  -3  -6    9.81    7.34   0
  -8  -3  -6   78.28   11.05   0
   8   3   6   53.37    8.13   0
  15  -4  -6  125.17   12.70   0
  15  -4  -6  120.83   12.26   0
  14  -4  -6   86.57   11.67   0
  14  -4  -6   63.75    8.23   0
  13  -4  -6   32.16   10.47   0
  13  -4  -6   53.83   10.48   0
  12  -4  -6   34.36   10.25   0
  12  -4  -6   44.55    9.72   0
  11  -4  -6    3.86    9.53   0
  11  -4  -6    4.20    6.57   0
  10  -4  -6   18.76    6.32   0
  10  -4  -6   18.32    9.29   0
  10  -4  -6   21.35    6.34   0
   9  -4  -6  334.47    8.20   0
   9  -4  -6  329.14    7.86   0
   9  -4  -6  375.66   11.60   0
   8  -4  -6  718.73   11.43   0
   8  -4  -6  792.26   14.37   0
  -7   4   6  944.07   14.19   0
   7  -4  -6  960.67   15.42   0
   7  -4  -6  866.68   12.11   0
  -6   4   6 1771.55   17.10   0
   6  -4  -6 1602.30   13.74   0
  -5   4   6  311.94   10.33   0
   5  -4  -6  281.11    7.14   0
  -5   4   6  297.80    9.04   0
  -4   4   6  747.68    9.20   0
   4  -4  -6  747.31   10.76   0
  -4   4   6  777.03   10.66   0
  -3   4   6   83.90    9.34   0
   3  -4  -6   81.38    5.84   0
  -3   4   6   70.32    5.78   0
   2  -4  -6  111.39    5.99   0
  -2   4   6  123.11    7.99   0
  -1   4   6   13.99    5.48   0
   1  -4  -6    5.44    5.82   0
   0   4   6  876.82    9.09   0
   0  -4  -6  926.39   10.88   0
   1   4   6  323.96    8.84   0
  -1  -4  -6  318.04    9.00   0
   2   4   6  828.52   10.53   0
  -2  -4  -6  814.32   10.47   0
   3   4   6  226.96    6.84   0
  -3  -4  -6  238.30    6.84   0
   4   4   6  145.52    6.62   0
  -4  -4  -6  141.39    6.68   0
   5   4   6  505.19   10.82   0
  -5  -4  -6  426.69    8.06   0
  -6  -4  -6  112.90    7.77   0
   6   4   6   99.63   10.45   0
   7   4   6  162.15   11.60   0
  -7  -4  -6  155.62    8.20   0
  15  -5  -6   25.32   12.09   0
  15  -5  -6   40.41   11.87   0
  14  -5  -6  273.94   13.24   0
  14  -5  -6  240.68    8.98   0
  13  -5  -6  179.58   11.75   0
  13  -5  -6  176.73    8.22   0
  12  -5  -6  188.21    9.00   0
  12  -5  -6  210.31    8.01   0
  11  -5  -6    3.60    9.60   0
  11  -5  -6    6.05    9.22   0
  11  -5  -6    8.82    9.24   0
  10  -5  -6    5.66    9.37   0
  10  -5  -6    8.75    8.81   0
  10  -5  -6    8.56    6.46   0
   9  -5  -6   12.11    8.85   0
   9  -5  -6   12.17    9.49   0
   8  -5  -6   44.17    6.44   0
  -7   5   6   57.03    8.88   0
   7  -5  -6   45.64    6.13   0
  -6   5   6  841.11   12.17   0
   6  -5  -6  843.45   11.39   0
   5  -5  -6 1021.03   11.56   0
  -5   5   6 1017.49   12.49   0
  -5   5   6 1039.05   11.73   0
  -4   5   6  318.25    7.11   0
  -4   5   6  341.78   11.15   0
   4  -5  -6  314.90    9.18   0
   3  -5  -6   64.54    8.06   0
  -3   5   6   71.96    5.60   0
  -2   5   6    4.73    5.57   0
   2  -5  -6   16.96    5.58   0
  -1   5   6   85.05    5.96   0
   1  -5  -6   86.85    8.36   0
   0  -5  -6   60.78    5.95   0
   0   5   6   65.21    8.25   0
   1   5   6   15.73    5.61   0
  -1  -5  -6   13.85    5.61   0
   2   5   6  153.73    6.35   0
  -2  -5  -6  174.90    8.72   0
   3   5   6  517.06    7.92   0
  -3  -5  -6  495.69    7.91   0
   4   5   6   61.83    7.03   0
  -4  -5  -6   62.23    9.32   0
   5   5   6  156.38   10.05   0
  -5  -5  -6  147.02   10.09   0
  -6  -5  -6   36.63   10.57   0
   6   5   6   24.56    7.44   0
  -7  -5  -6   95.19   11.88   0
   7   5   6   83.34    8.60   0
  15  -6  -6    3.26   14.71   0
  15  -6  -6    8.64   11.76   0
  14  -6  -6   77.16   14.36   0
  14  -6  -6   72.67    8.16   0
  13  -6  -6   72.29   13.58   0
  13  -6  -6   74.16   10.41   0
  13  -6  -6   78.37    7.54   0
  12  -6  -6  219.56   14.79   0
  12  -6  -6  191.77    7.76   0
  12  -6  -6  183.64    8.03   0
  11  -6  -6  430.96   16.24   0
  11  -6  -6  397.19   11.09   0
  11  -6  -6  397.19    8.66   0
  10  -6  -6   58.11    6.73   0
  10  -6  -6   53.56    6.86   0
   9  -6  -6   42.06    6.34   0
   8  -6  -6   53.63    8.42   0
   7  -6  -6   97.06    6.64   0
  -7   6   6   53.47    9.39   0
   6  -6  -6   30.57    8.33   0
  -6   6   6   25.56    8.88   0
  -5   6   6  718.95   12.65   0
   5  -6  -6  667.19    8.54   0
  -5   6   6  715.57   10.50   0
   4  -6  -6  587.30   10.27   0
  -4   6   6  629.28   10.21   0
  -4   6   6  612.40   12.08   0
   3  -6  -6 1536.30   11.28   0
  -3   6   6 1514.91   10.96   0
  -2   6   6  990.05   11.00   0
   2  -6  -6  974.52   11.22   0
   1  -6  -6  314.67    7.05   0
  -1   6   6  322.09    7.00   0
   0  -6  -6  227.78    6.74   0
   0   6   6  237.17    8.92   0
  -1  -6  -6   33.97    8.51   0
   1   6   6   37.48    8.38   0
  -2  -6  -6   69.52    6.34   0
   2   6   6   74.32    6.31   0
  -3  -6  -6   20.39    6.76   0
   3   6   6   20.82    8.82   0
   4   6   6   25.15    6.93   0
  -4  -6  -6   25.66    7.04   0
  -5  -6  -6  164.47    8.02   0
   5   6   6  174.05    7.99   0
  -6  -6  -6  126.20    8.60   0
   6   6   6  105.07    8.47   0
  15  -7  -6   15.98   18.35   0
  15  -7  -6   16.84    8.36   0
  15  -7  -6   23.49    8.45   0
  14  -7  -6   67.05    8.08   0
  14  -7  -6   75.64    8.14   0
  13  -7  -6  132.34    8.01   0
  13  -7  -6  135.53   11.01   0
  12  -7  -6   84.76   10.37   0
  12  -7  -6   89.82   10.47   0
  11  -7  -6  366.61   10.91   0
  11  -7  -6  379.71    8.64   0
  10  -7  -6  192.84    7.48   0
  10  -7  -6  201.89    7.57   0
   9  -7  -6  547.51   10.75   0
   8  -7  -6  369.87    7.97   0
  -7   7   6   35.48    9.30   0
   7  -7  -6   23.59    8.66   0
   6  -7  -6    8.49    5.89   0
  -6   7   6    1.44    9.16   0
   5  -7  -6  350.42    9.41   0
  -5   7   6  386.46   11.56   0
  -5   7   6  383.56    9.30   0
   4  -7  -6   14.15    8.35   0
  -4   7   6   12.42    5.81   0
  -3   7   6  100.87    8.17   0
   3  -7  -6   91.43    6.09   0
  -2   7   6  426.70    7.64   0
   2  -7  -6  431.05    7.70   0
  -1   7   6  366.83    7.15   0
   1  -7  -6  353.25    7.20   0
   0  -7  -6  754.39    8.72   0
   0   7   6  732.62    8.80   0
  -1  -7  -6   52.01    8.78   0
   1   7   6   61.83    6.31   0
  -2  -7  -6   10.46    6.42   0
   2   7   6   38.03    9.61   0
   3   7   6   13.05    6.95   0
  -3  -7  -6   11.71    9.62   0
  -4  -7  -6   -5.02    7.21   0
   4   7   6    7.51   10.31   0
  -5  -7  -6    5.95    7.84   0
   5   7   6   -0.80    7.90   0
  15  -8  -6   22.84    8.53   0
  15  -8  -6   13.36   11.81   0
  14  -8  -6   29.39    7.96   0
  14  -8  -6   22.69    7.84   0
  13  -8  -6   74.33    7.95   0
  13  -8  -6   80.29    7.91   0
  12  -8  -6  132.69    7.73   0
  12  -8  -6  151.03    7.64   0
  11  -8  -6  407.75    9.15   0
  11  -8  -6  390.54    8.84   0
  10  -8  -6  138.72    7.23   0
   9  -8  -6  114.12    6.96   0
  -8   8   6  689.73   16.29   0
   8  -8  -6  617.51    8.87   0
   7  -8  -6  320.21    9.72   0
  -7   8   6  342.18   11.70   0
  -6   8   6  374.81   11.81   0
   6  -8  -6  318.03    7.54   0
   5  -8  -6   47.01    6.12   0
  -5   8   6   50.08    7.00   0
  -5   8   6   46.00    5.99   0
   4  -8  -6   54.80    6.14   0
  -4   8   6   63.81    6.20   0
  -3   8   6   14.60    5.61   0
   3  -8  -6    6.07    5.80   0
  -2   8   6   84.02    6.30   0
   2  -8  -6   79.98    8.90   0
  -1   8   6   63.11    6.28   0
   1  -8  -6   60.61    8.77   0
   0   8   6  465.49    8.06   0
   0  -8  -6  450.13    8.03   0
  -1  -8  -6  441.45    8.36   0
   1   8   6  428.15    8.24   0
  -2  -8  -6  100.12    7.21   0
   2   8   6  112.76    7.16   0
   3   8   6  192.91   11.08   0
  -3  -8  -6  183.23   10.81   0
   4   8   6    8.03    8.03   0
  -4  -8  -6   10.18    8.09   0
  15  -9  -6   29.38    8.96   0
  15  -9  -6   34.24   12.41   0
  14  -9  -6  103.25    8.63   0
  14  -9  -6   90.10    8.76   0
  13  -9  -6   41.49    8.03   0
  13  -9  -6   51.66   10.95   0
  12  -9  -6   39.59   10.44   0
  12  -9  -6   11.60    7.16   0
  11  -9  -6   40.67   10.10   0
  11  -9  -6   30.63    7.01   0
  10  -9  -6  248.39   10.52   0
   9  -9  -6  185.60    7.47   0
  -8   9   6  348.76   15.59   0
   8  -9  -6  306.20    7.91   0
  -7   9   6  191.00   10.85   0
   7  -9  -6  157.81    7.18   0
  -6   9   6  163.10   10.45   0
   6  -9  -6  155.42    6.86   0
   5  -9  -6  513.15   10.26   0
  -5   9   6  518.84   12.54   0
  -5   9   6  562.71   10.26   0
   4  -9  -6  178.99    6.96   0
  -4   9   6  178.58    6.80   0
  -3   9   6  145.80    6.72   0
   3  -9  -6  147.83    6.78   0
  -2   9   6   46.31    6.39   0
   2  -9  -6   57.48    8.90   0
  -1   9   6   30.87    6.39   0
   1  -9  -6   33.70    6.53   0
   0   9   6   48.47    6.67   0
   0  -9  -6   47.34    7.03   0
  -1  -9  -6   93.92    7.51   0
   1   9   6  114.98   10.30   0
  -2  -9  -6   48.48   10.59   0
   2   9   6   51.64    7.50   0
  -3  -9  -6  283.50    9.03   0
   3   9   6  271.67    9.10   0
  14 -10  -6   57.82    8.59   0
  14 -10  -6   46.71    8.39   0
  13 -10  -6   58.84    8.14   0
  13 -10  -6   65.36   11.49   0
  12 -10  -6   27.19    7.66   0
  12 -10  -6   32.55   10.80   0
  11 -10  -6  122.39   10.35   0
  10 -10  -6   -4.51    9.82   0
   9 -10  -6   19.31    6.70   0
  -8  10   6  136.95   15.29   0
   8 -10  -6  127.42    7.25   0
  -7  10   6  376.56   13.14   0
   7 -10  -6  330.88    8.17   0
   6 -10  -6  162.20    9.62   0
  -6  10   6  162.87   11.00   0
   5 -10  -6  528.93    8.59   0
  -5  10   6  484.78   10.34   0
  -5  10   6  511.07    8.53   0
   4 -10  -6  347.93   10.09   0
  -4  10   6  356.36    7.82   0
  -3  10   6  340.03    9.95   0
   3 -10  -6  320.23    7.76   0
   2 -10  -6  160.60   10.33   0
  -2  10   6  177.78    7.31   0
   1 -10  -6    1.91    6.88   0
  -1  10   6    6.24    6.96   0
   0  10   6    0.30    7.29   0
   0 -10  -6   -3.18   10.43   0
   1  10   6  133.00   11.27   0
  -1 -10  -6   93.42    8.01   0
   2  10   6   25.84   11.52   0
  -2 -10  -6   17.95    8.22   0
  13 -11  -6  187.82    9.28   0
  13 -11  -6  208.03   12.44   0
  12 -11  -6   83.45   11.78   0
  12 -11  -6   70.84    8.40   0
  11 -11  -6   68.22   11.12   0
  10 -11  -6   62.09    7.64   0
   9 -11  -6   34.14   10.10   0
   8 -11  -6   78.17    7.35   0
  -8  11   6   77.66   15.79   0
   7 -11  -6   53.55    6.96   0
  -7  11   6   49.99   13.00   0
   6 -11  -6   73.48    7.12   0
  -6  11   6   68.03   10.97   0
   5 -11  -6  257.23   10.34   0
  -5  11   6  261.85    7.82   0
  -4  11   6  169.69    7.70   0
   4 -11  -6  163.89    7.63   0
  -3  11   6   14.31    7.23   0
   3 -11  -6   23.84    7.00   0
  -2  11   6  177.40   10.79   0
   2 -11  -6  144.63   10.51   0
   1 -11  -6   96.97    7.91   0
  -1  11   6  123.31   10.86   0
   0 -11  -6   86.74    8.36   0
   0  11   6   81.34    8.37   0
  13 -12  -6   46.68   12.37   0
  13 -12  -6   36.30    9.00   0
  12 -12  -6  117.58    8.73   0
  12 -12  -6  115.08    8.82   0
  11 -12  -6  161.62   11.97   0
  10 -12  -6  171.23    8.55   0
   9 -12  -6   23.15   10.45   0
  -8  12   6   30.01   17.85   0
   8 -12  -6   31.14    7.54   0
   7 -12  -6   16.22    7.32   0
  -7  12   6   16.37   10.85   0
   6 -12  -6   17.55    7.34   0
  -6  12   6    7.56   11.01   0
   5 -12  -6    5.04    7.11   0
  -4  12   6  246.63   11.28   0
   4 -12  -6  188.51    8.30   0
  -3  12   6  104.78    8.02   0
   3 -12  -6  100.81   11.43   0
  -2  12   6  142.92    8.37   0
   2 -12  -6  182.73   11.34   0
  -1  12   6   60.24   11.79   0
   1 -12  -6   64.11    8.58   0
  11 -13  -6   33.03    8.59   0
  10 -13  -6  203.61    9.29   0
   9 -13  -6  192.58   12.36   0
   8 -13  -6   78.25    8.49   0
  -7  13   6   60.85   12.36   0
   7 -13  -6   62.79    8.19   0
   6 -13  -6    7.68   11.17   0
  -6  13   6    4.71   12.01   0
   5 -13  -6   50.84   11.28   0
  -4  13   6    8.20   11.52   0
   4 -13  -6    6.76   11.87   0
   2 -16   7   43.66    9.04   0
  -3  16  -7  101.84   13.38   0
   3 -16   7   68.46    9.36   0
   3 -16   7   56.72    9.72   0
  -4  16  -7    7.72    9.22   0
   4 -16   7   11.54    8.85   0
   4 -16   7    9.08    8.58   0
  -2 -15   7   15.13   13.53   0
  -2 -15   7    6.48   12.14   0
   2  15  -7    7.54    9.13   0
   1  15  -7   17.37   12.08   0
  -1 -15   7    7.03   12.34   0
  -1 -15   7    3.39    7.97   0
   0 -15   7   11.59   11.34   0
   0  15  -7    2.58    8.39   0
   0 -15   7   15.95    8.68   0
   1 -15   7   74.65    9.15   0
   1 -15   7   78.00   11.82   0
  -1  15  -7  113.78   12.29   0
  -2  15  -7  101.14   12.30   0
   2 -15   7   98.35   11.84   0
  -3  15  -7  118.83   12.49   0
   3 -15   7  101.71   12.48   0
   3 -15   7  107.54   12.01   0
   4 -15   7   -2.99    7.85   0
  -4  15  -7    3.03   11.96   0
   4 -15   7    0.98   11.53   0
   5 -15   7   24.38   11.91   0
   5 -15   7   23.93    8.47   0
   6 -15   7   26.13    8.80   0
   6 -15   7   32.54    8.82   0
   7 -15   7    5.91    8.78   0
   7 -15   7    4.35   12.49   0
  -4 -14   7   45.52   14.94   0
   4  14  -7   48.71    9.17   0
   3  14  -7   28.05   12.43   0
  -3 -14   7   36.11   11.52   0
   2  14  -7    5.22   11.62   0
  -2 -14   7    9.85   10.95   0
  -2 -14   7   13.91   12.17   0
   1  14  -7    1.83    7.93   0
  -1 -14   7   21.32   11.91   0
  -1 -14   7   24.90   10.75   0
   0  14  -7   18.88    7.71   0
   0 -14   7   15.22    8.25   0
   0 -14   7   10.82   10.48   0
  -1  14  -7   29.82   11.08   0
   1 -14   7   24.78   10.61   0
   1 -14   7   19.32   11.19   0
  -2  14  -7   57.01    8.15   0
   2 -14   7   56.91   10.52   0
   3 -14   7  155.44   11.68   0
   3 -14   7  166.18   11.79   0
  -4  14  -7  185.60    9.33   0
   4 -14   7  155.28    8.82   0
   4 -14   7  188.55   12.07   0
   5 -14   7   75.61   11.61   0
   5 -14   7   77.20    8.24   0
   6 -14   7  132.91   11.91   0
   6 -14   7  124.21    8.70   0
   7 -14   7    5.33    7.99   0
   7 -14   7   14.86    8.17   0
   8 -14   7   45.00    8.67   0
   5  13  -7   59.84    9.15   0
  -5 -13   7   68.89   12.50   0
   4  13  -7  121.88   12.18   0
  -4 -13   7  119.69   11.86   0
  -3 -13   7   69.42   10.83   0
   3  13  -7   58.56    8.16   0
   2  13  -7  280.53    9.38   0
  -2 -13   7  251.46   13.04   0
  -2 -13   7  257.77   11.79   0
  -1 -13   7   26.50   10.18   0
   1  13  -7   21.65    7.49   0
  -1 -13   7   22.97    7.73   0
   0  13  -7   40.12    7.59   0
   0 -13   7   28.97    9.81   0
   0 -13   7   25.82   10.92   0
  -1  13  -7   21.64    7.32   0
   1 -13   7    8.35   10.79   0
   1 -13   7   20.35   10.04   0
   2 -13   7   77.43   10.48   0
  -2  13  -7   95.25   10.95   0
   3 -13   7   15.40   10.41   0
   3 -13   7   14.34   10.26   0
   4 -13   7   90.06    8.14   0
  -4  13  -7  104.46    8.49   0
   4 -13   7   91.47    8.08   0
   5 -13   7   97.38   11.41   0
   5 -13   7  118.88    8.28   0
   6 -13   7  359.21   12.47   0
   7 -13   7  223.78   11.63   0
   8 -13   7   47.17   11.66   0
   9 -13   7   34.48   11.98   0
  -6 -12   7   18.21   14.03   0
   6  12  -7   10.13    8.57   0
   5  12  -7   88.77    8.68   0
  -5 -12   7   92.76   11.39   0
  -4 -12   7  232.07   11.80   0
   4  12  -7  239.88    8.85   0
  -3 -12   7   27.83    9.60   0
   3  12  -7   32.98    7.57   0
   2  12  -7  226.39    8.23   0
  -2 -12   7  173.91   11.97   0
  -2 -12   7  184.42   10.67   0
  -1 -12   7  150.67   10.43   0
   1  12  -7  164.42    8.01   0
  -1 -12   7  137.02   11.56   0
   0  12  -7  391.43   11.25   0
   0 -12   7  350.01   11.48   0
   0 -12   7  309.90    9.75   0
   1 -12   7  386.59   11.64   0
  -1  12  -7  388.21    9.13   0
   1 -12   7  365.45   12.36   0
  -2  12  -7   39.29   10.05   0
   2 -12   7   29.48    6.93   0
   3 -12   7   39.95   10.26   0
   3 -12   7   38.95    7.64   0
   4 -12   7   11.27   10.16   0
   4 -12   7   20.51   10.02   0
   5 -12   7   14.58   10.08   0
   6 -12   7   38.56    7.47   0
   7 -12   7  285.06    9.04   0
   8 -12   7  134.25   12.36   0
   8 -12   7  135.70    8.58   0
   9 -12   7  151.03   13.18   0
   9 -12   7  143.69    8.91   0
  10 -12   7   19.03    8.83   0
  10 -12   7   18.70   13.07   0
  -8 -11   7   18.69   15.45   0
   8  11  -7   28.63    9.33   0
   7  11  -7   61.38   12.26   0
  -7 -11   7   67.97   12.02   0
   6  11  -7   54.38    8.22   0
  -6 -11   7   53.20   10.81   0
  -5 -11   7   57.00   10.45   0
   5  11  -7   60.01   10.76   0
   4  11  -7   80.40    7.54   0
  -4 -11   7   76.16   10.18   0
   3  11  -7  100.23    7.71   0
  -3 -11   7   98.65    9.90   0
   2  11  -7   96.53   10.05   0
  -2 -11   7   67.73   10.54   0
  -2 -11   7   75.54    9.53   0
   1  11  -7   94.38    9.76   0
  -1 -11   7   77.57    9.41   0
  -1 -11   7   73.23   10.42   0
   0  11  -7  101.76   10.08   0
   0 -11   7   89.09   10.31   0
   0 -11   7   97.33    9.70   0
  -1  11  -7  812.66   10.78   0
   1 -11   7  771.04   13.19   0
   1 -11   7  754.45   13.73   0
   2 -11   7  220.47    8.32   0
  -2  11  -7  235.62    8.38   0
   3 -11   7  126.66    7.63   0
  -3  11  -7  129.17    7.88   0
   3 -11   7  122.09    7.77   0
   4 -11   7   71.33    9.73   0
   5 -11   7   47.60    9.99   0
   6 -11   7    2.95   10.22   0
   6 -11   7    6.94    6.98   0
   7 -11   7  177.19   12.26   0
   7 -11   7  154.70    8.26   0
   8 -11   7   63.80   11.47   0
   8 -11   7   54.09    7.94   0
   9 -11   7   66.05    8.32   0
   9 -11   7   71.60    8.99   0
  10 -11   7  123.43    9.17   0
  10 -11   7  132.56   13.86   0
   9  10  -7  145.54    9.80   0
  -9 -10   7  136.99   17.37   0
   9  10  -7  152.08   14.77   0
   8  10  -7   86.11   12.38   0
  -8 -10   7   86.51   12.14   0
   8  10  -7   86.64   14.93   0
   7  10  -7  187.06    8.68   0
  -7 -10   7  157.06   11.85   0
   6  10  -7   77.64    7.61   0
  -6 -10   7   71.46   10.50   0
   5  10  -7  136.78    7.87   0
  -5 -10   7  164.69   12.86   0
   4  10  -7  170.31    7.93   0
  -4 -10   7  145.31   10.35   0
   3  10  -7   11.71    6.83   0
  -3 -10   7   10.45   10.73   0
   2  10  -7    6.41    6.67   0
  -2 -10   7    5.05    9.22   0
  -2 -10   7    4.80    8.41   0
   1  10  -7  193.24   10.22   0
  -1 -10   7  168.18    9.91   0
  -1 -10   7  167.10   10.80   0
   0 -10   7  530.37   12.35   0
   0 -10   7  536.94   13.01   0
   0  10  -7  606.67   11.79   0
   1 -10   7  610.56   12.66   0
  -1  10  -7  715.65   12.16   0
   1 -10   7  622.20   12.85   0
  -2  10  -7  243.42    7.85   0
   2 -10   7  232.49   10.51   0
  -3  10  -7  117.42    7.44   0
   3 -10   7  112.30    9.69   0
   4 -10   7  621.54   10.60   0
   4 -10   7  506.73    9.37   0
   5 -10   7  214.80   11.04   0
   5 -10   7  181.42    7.75   0
   6 -10   7  155.66    7.73   0
   6 -10   7  185.49   11.06   0
   7 -10   7   14.21   10.39   0
   7 -10   7   19.34    7.11   0
   8 -10   7   45.25    7.60   0
   8 -10   7   40.73    8.02   0
   9 -10   7   -0.28    8.24   0
   9 -10   7    4.72    7.61   0
  10 -10   7   53.64   12.65   0
  10 -10   7   46.94    8.37   0
 -10  -9   7   21.43   13.03   0
  -9  -9   7   19.92   11.97   0
   9   9  -7   11.68    8.61   0
   9   9  -7   21.59   11.79   0
   8   9  -7   15.48    7.46   0
   8   9  -7   11.00   10.71   0
  -8  -9   7   11.89   13.16   0
   7   9  -7  223.65    8.35   0
   7   9  -7  209.00   14.64   0
  -7  -9   7  201.09   12.38   0
   6   9  -7  269.56    8.26   0
  -6  -9   7  247.84   12.02   0
  -5  -9   7   77.78   11.90   0
   5   9  -7   84.19    7.48   0
   4   9  -7  366.93    8.12   0
  -4  -9   7  304.67   12.45   0
   3   9  -7   21.29    8.94   0
  -3  -9   7   15.30    9.66   0
  -3  -9   7   16.49   10.30   0
  -2  -9   7  187.20   11.71   0
   2   9  -7  196.35    7.40   0
  -2  -9   7  173.89   11.01   0
   1   9  -7   91.12    9.23   0
  -1  -9   7   63.22   11.42   0
  -1  -9   7   60.45    8.84   0
   0   9  -7   75.71    6.74   0
   0  -9   7   67.98    9.74   0
   0  -9   7   68.35    9.16   0
  -1   9  -7  235.72   10.20   0
   1  -9   7  185.72    7.95   0
   1  -9   7  198.30   10.32   0
   2  -9   7  343.66    8.52   0
  -2   9  -7  348.35    8.38   0
   3  -9   7  136.02    7.48   0
  -3   9  -7  132.16    9.81   0
   3  -9   7  134.03    9.55   0
   4  -9   7  259.63    8.53   0
   4  -9   7  259.49   10.15   0
   5  -9   7  293.13   11.17   0
   5  -9   7  297.74   10.25   0
   6  -9   7  189.62   10.83   0
   6  -9   7  197.38   10.02   0
   7  -9   7  213.15   10.52   0
   7  -9   7  189.75   11.34   0
   8  -9   7    2.57    7.13   0
   8  -9   7   -5.21   10.45   0
   9  -9   7    1.00    7.59   0
   9  -9   7   11.77   11.22   0
  10  -9   7   24.66    8.33   0
  10  -9   7   41.41   12.15   0
  10   8  -7   11.61   11.57   0
 -10  -8   7    7.87   12.23   0
  10   8  -7   22.42   12.24   0
   9   8  -7   23.47   10.90   0
   9   8  -7   12.87   10.69   0
  -9  -8   7   17.32   11.25   0
   8   8  -7   23.78    7.28   0
  -8  -8   7   25.59   12.72   0
   8   8  -7   25.43   10.34   0
   7   8  -7    3.51    6.83   0
   7   8  -7   -0.54   11.81   0
  -7  -8   7    4.01   11.77   0
   6   8  -7  158.03    7.30   0
  -6  -8   7  144.15   13.07   0
   5   8  -7  145.66    9.46   0
  -5  -8   7  136.38   14.46   0
  -4  -8   7  982.91   23.26   0
   4   8  -7 1092.91   10.90   0
  -4  -8   7  974.06   25.43   0
   3   8  -7  299.51   10.21   0
  -3  -8   7  258.01   13.81   0
  -3  -8   7  258.37   14.79   0
   2   8  -7   41.26    6.85   0
  -2  -8   7   37.04   10.91   0
  -2  -8   7   37.81    9.63   0
   1   8  -7  387.15    8.50   0
  -1  -8   7  341.41   11.32   0
  -1  -8   7  351.54   11.72   0
   0   8  -7    5.90    6.55   0
   0  -8   7   -0.16    8.41   0
   0  -8   7    4.27    8.47   0
   1  -8   7  219.39    7.66   0
  -1   8  -7  204.80    7.55   0
   1  -8   7  180.03    7.44   0
  -2   8  -7    8.51    6.46   0
   2  -8   7    0.02    9.01   0
   3  -8   7  300.42    8.41   0
   3  -8   7  282.77   10.29   0
   4  -8   7  272.16   10.67   0
   4  -8   7  252.80   10.08   0
   5  -8   7  498.06   10.87   0
   5  -8   7  473.32    9.79   0
   6  -8   7   98.47    7.15   0
   6  -8   7  105.93    7.69   0
  -6   8  -7  101.09    9.54   0
   7  -8   7  265.23    8.27   0
   7  -8   7  313.09   12.07   0
  -7   8  -7  302.74    8.19   0
   8  -8   7  235.35   10.93   0
   8  -8   7  220.45   11.73   0
  -8   8  -7  212.95    8.13   0
   9  -8   7   85.42    7.89   0
  -9   8  -7   95.43    7.95   0
   9  -8   7   77.02    8.70   0
  10  -8   7   43.99    8.81   0
 -10   8  -7   50.86    8.13   0
  10  -8   7   58.41    8.28   0
  11   7  -7   98.89    9.39   0
 -11  -7   7   87.66   13.06   0
  11   7  -7   86.71   12.37   0
  10   7  -7  145.53    8.95   0
 -10  -7   7  149.10   12.64   0
  10   7  -7  149.66   14.27   0
  -9  -7   7   65.42   12.92   0
   9   7  -7   60.98   10.32   0
   9   7  -7   66.83   10.49   0
   8   7  -7   10.00    7.02   0
   8   7  -7   15.07    9.62   0
  -8  -7   7   27.91   10.11   0
   7   7  -7   -2.81    6.65   0
   7   7  -7    0.54   11.23   0
  -7  -7   7    1.14    9.34   0
   6   7  -7   -2.40    8.85   0
  -6  -7   7    2.73   13.06   0
   5   7  -7    7.64    6.25   0
   4   7  -7  233.46    7.49   0
   3   7  -7  658.51    9.18   0
   2   7  -7  186.14    7.32   0
  -2  -7   7  162.55   11.96   0
  -2  -7   7  161.01   10.73   0
   1   7  -7 1133.20   12.83   0
  -1  -7   7  990.06   16.04   0
  -1  -7   7  986.31   15.92   0
   0  -7   7   70.35    7.00   0
   0   7  -7   79.01    6.95   0
   0  -7   7   78.44    9.04   0
  -1   7  -7  131.08    9.68   0
   1  -7   7  118.93    9.65   0
   2  -7   7  171.48    7.83   0
  -2   7  -7  168.10    7.51   0
   2  -7   7  149.15    7.00   0
   3  -7   7   84.34    8.71   0
   3  -7   7   80.25   10.02   0
  -3   7  -7   85.57    9.05   0
   4  -7   7   18.26    6.14   0
   4  -7   7   16.64    6.68   0
  -4   7  -7   13.22    8.77   0
  -5   7  -7  577.17    9.02   0
   5  -7   7  655.29   12.82   0
   5  -7   7  595.70   10.97   0
   6  -7   7  412.93   11.82   0
  -6   7  -7  375.42   10.49   0
   6  -7   7  357.59    8.31   0
   7  -7   7  308.52   10.47   0
   7  -7   7  329.34   11.85   0
  -7   7  -7  334.56   11.03   0
   8  -7   7  208.29    8.01   0
   8  -7   7  214.09    8.96   0
  -8   7  -7  225.91   10.59   0
   9  -7   7   38.84   10.61   0
   9  -7   7   30.51    8.08   0
  -9   7  -7   39.45    7.60   0
  10  -7   7  203.16    9.99   0
 -10   7  -7  219.43   11.85   0
  10  -7   7  205.35    9.14   0
  12   6  -7   39.00    9.29   0
  12   6  -7   38.59   12.14   0
  11   6  -7  125.65    9.19   0
  11   6  -7  106.31   11.60   0
 -11  -6   7  102.98   12.63   0
  10   6  -7   84.26    8.15   0
 -10  -6   7   63.19   11.21   0
  10   6  -7   80.70   12.80   0
   9   6  -7  388.15   11.71   0
   9   6  -7  330.50   12.00   0
  -9  -6   7  346.50   14.99   0
   8   6  -7   82.93    9.39   0
  -8  -6   7   72.17   12.38   0
   8   6  -7   76.86    9.68   0
   7   6  -7  125.24    9.31   0
  -7  -6   7  118.37   13.38   0
   7   6  -7  117.64   12.53   0
   6   6  -7   15.76    6.60   0
   5   6  -7  220.80    9.87   0
   4   6  -7  534.21    8.87   0
   3   6  -7  822.93    9.84   0
  -2  -6   7  141.53   13.33   0
  -2  -6   7  146.49   13.33   0
   2   6  -7  158.03    6.95   0
  -1  -6   7 1368.11   12.06   0
  -1  -6   7 1290.41   18.66   0
   1   6  -7 1383.56   12.15   0
   0  -6   7 1131.86   14.93   0
   0   6  -7 1240.03   11.56   0
   0  -6   7 1203.77   11.70   0
   1  -6   7  369.13    8.62   0
  -1   6  -7  371.12    8.50   0
  -1   6  -7  325.77    8.55   0
   2  -6   7  477.17   10.53   0
   2  -6   7  498.78   11.44   0
  -2   6  -7  471.14   10.89   0
   3  -6   7   70.07    6.98   0
  -3   6  -7   59.67    8.78   0
   3  -6   7   67.03    8.56   0
   4  -6   7  183.86    9.61   0
   4  -6   7  207.47   10.90   0
  -4   6  -7  205.76    9.67   0
   5  -6   7   24.13    8.66   0
   5  -6   7   27.04    9.81   0
  -5   6  -7   28.25    6.13   0
   6  -6   7   34.11    7.17   0
  -6   6  -7   31.22    6.40   0
   6  -6   7   31.29    6.33   0
   7  -6   7   38.46    6.56   0
   7  -6   7   48.74   10.35   0
  -7   6  -7   41.32    6.74   0
   8  -6   7  378.63   10.90   0
   8  -6   7  361.33    9.76   0
  -8   6  -7  408.58   11.10   0
   9  -6   7  105.72    7.85   0
   9  -6   7   98.44   11.84   0
  -9   6  -7   99.67    7.71   0
  10  -6   7   89.99   11.41   0
  10  -6   7   82.15    8.89   0
 -10   6  -7   78.56    8.48   0
  12   5  -7    4.41   11.16   0
  12   5  -7   -0.73   11.88   0
  11   5  -7  212.27   11.80   0
  11   5  -7  201.14    9.06   0
  10   5  -7   87.13   10.87   0
  10   5  -7   73.71    9.98   0
   9   5  -7  109.83    7.85   0
   9   5  -7   88.58    9.99   0
   8   5  -7  166.53    7.19   0
   8   5  -7  149.92   12.19   0
   7   5  -7  122.99    9.27   0
   7   5  -7  106.08   13.66   0
   6   5  -7 1225.46   13.09   0
   5   5  -7  212.58    7.26   0
   4   5  -7  228.03    7.49   0
   3   5  -7   16.96    6.35   0
  -2  -5   7   23.74    6.08   0
  -2  -5   7   17.42   10.18   0
   2   5  -7   23.18    6.28   0
  -2  -5   7   18.12   10.88   0
  -1  -5   7    6.29    5.89   0
   1   5  -7   -0.01    8.61   0
  -1  -5   7    3.98    7.96   0
   0  -5   7  480.42   11.03   0
   0   5  -7  540.50   10.99   0
   0   5  -7  472.44   11.95   0
   0  -5   7  497.85   10.97   0
   1  -5   7 1136.73   13.50   0
  -1   5  -7 1130.49   13.31   0
  -1   5  -7 1043.86   13.27   0
   2  -5   7 1194.68   11.76   0
   2  -5   7 1296.65   12.68   0
  -2   5  -7 1280.80   13.95   0
   3  -5   7  578.64    9.97   0
   3  -5   7  581.15   10.65   0
  -3   5  -7  562.71    8.74   0
   4  -5   7   69.08    6.27   0
   4  -5   7   74.26    7.28   0
  -4   5  -7   73.64    9.13   0
   5  -5   7  147.79    6.63   0
   5  -5   7  153.18    7.92   0
  -5   5  -7  146.44    9.09   0
   6  -5   7    2.78    6.18   0
   6  -5   7    5.66    7.12   0
  -6   5  -7    6.33    5.87   0
   7  -5   7   17.27    6.37   0
   7  -5   7   25.21    7.26   0
  -7   5  -7   19.53    6.51   0
   8  -5   7   61.12    9.71   0
   8  -5   7   42.03    7.91   0
  -8   5  -7   60.42    9.84   0
   9  -5   7  109.40   10.62   0
   9  -5   7  103.41   11.71   0
  -9   5  -7  104.27   11.01   0
  10  -5   7  100.92    8.45   0
  10  -5   7  107.73    9.39   0
 -10   5  -7  103.86    8.49   0
  13   4  -7   15.26    8.83   0
  13   4  -7   12.24    8.44   0
  12   4  -7   88.62   11.68   0
  12   4  -7   81.26   11.21   0
  11   4  -7   -5.63    7.40   0
  11   4  -7    4.88    9.88   0
  10   4  -7   91.26    9.92   0
  10   4  -7  100.07    7.77   0
   9   4  -7  345.68    8.37   0
   9   4  -7  332.84   11.64   0
   8   4  -7  600.78    9.23   0
   8   4  -7  579.42   15.12   0
   7   4  -7  226.67    9.76   0
   7   4  -7  188.82   13.16   0
   6   4  -7 1255.04   11.37   0
   5   4  -7 2029.45   13.76   0
   4   4  -7  761.25   11.62   0
   3   4  -7 1026.88   10.76   0
  -3  -4   7 1007.24   10.70   0
   2   4  -7   -0.37    8.72   0
   2   4  -7    3.75   10.37   0
  -2  -4   7    3.08    7.24   0
  -2  -4   7   -1.06    6.24   0
  -1  -4   7   25.20    8.81   0
   1   4  -7   23.62    6.36   0
  -1  -4   7   20.26    7.93   0
   1   4  -7   22.12    7.98   0
   0  -4   7  489.29    9.04   0
   0   4  -7  513.85   11.09   0
   0   4  -7  374.26    8.68   0
   1  -4   7  979.51   12.25   0
   1  -4   7  976.60   13.25   0
  -1   4  -7  978.16   12.53   0
   2  -4   7  552.53   10.66   0
   2  -4   7  552.70    9.67   0
  -2   4  -7  528.80   10.55   0
   3  -4   7 1421.79   13.32   0
   3  -4   7 1458.47   15.07   0
  -3   4  -7 1410.65   13.22   0
   4  -4   7  801.34   13.15   0
  -4   4  -7  762.78    9.20   0
   4  -4   7  783.83   11.27   0
   5  -4   7  767.59    9.53   0
   5  -4   7  830.74   13.17   0
  -5   4  -7  829.13    9.35   0
   6  -4   7  189.70    7.08   0
   6  -4   7  176.89    8.08   0
  -6   4  -7  213.46    6.97   0
   7  -4   7   18.50    6.63   0
   7  -4   7   15.15    7.32   0
  -7   4  -7   28.12    6.45   0
   8  -4   7    8.56    7.07   0
  -8   4  -7   18.18    6.84   0
   9  -4   7    8.86    7.52   0
  -9   4  -7    5.65   10.34   0
  10  -4   7   -4.87   11.19   0
 -10   4  -7    0.78    7.99   0
  13   3  -7   40.73   12.15   0
  13   3  -7   45.28   11.31   0
  12   3  -7   40.32    8.08   0
  12   3  -7   66.71   10.85   0
  11   3  -7  115.87   10.67   0
  11   3  -7  106.18   10.21   0
  10   3  -7   15.70    6.92   0
  10   3  -7   15.43    9.01   0
   9   3  -7   40.90    6.80   0
   9   3  -7   34.81    8.77   0
   8   3  -7  195.93    9.98   0
   8   3  -7  187.39   11.96   0
   7   3  -7   16.04    8.40   0
   7   3  -7   54.85    8.94   0
   6   3  -7  350.16    8.31   0
   5   3  -7  974.86   12.00   0
  -4  -3   7   10.04    5.89   0
   4   3  -7    6.55    6.19   0
  -3  -3   7 1651.75   12.81   0
   3   3  -7 1661.59   13.06   0
  -3  -3   7 1576.76   28.61   0
   3   3  -7 1510.75   28.06   0
  -2  -3   7  459.27    8.54   0
   2   3  -7  485.15   10.68   0
  -2  -3   7  389.31   11.35   0
   2   3  -7  421.98   11.91   0
  -1  -3   7 1127.60   13.06   0
   1   3  -7 1104.84   13.19   0
  -1  -3   7 1009.63   13.88   0
   1   3  -7  912.85   12.39   0
   0  -3   7  325.33    8.33   0
   0   3  -7  288.14    7.77   0
   1  -3   7  507.07   11.29   0
   1  -3   7  450.49    8.07   0
  -1   3  -7  489.88   10.16   0
   2  -3   7  111.40    6.39   0
   2  -3   7  121.40    9.90   0
  -2   3  -7  112.29    8.43   0
   3  -3   7  180.46   10.48   0
   3  -3   7  187.20    8.94   0
  -3   3  -7  183.16    6.85   0
   4  -3   7   19.22    5.80   0
   4  -3   7   18.04    6.98   0
  -4   3  -7   29.02    5.81   0
   5  -3   7  174.42    8.88   0
  -5   3  -7  167.11    9.20   0
   6  -3   7  853.20    9.61   0
  -6   3  -7  850.95    9.41   0
   7  -3   7  296.37    7.68   0
  -7   3  -7  295.12    7.66   0
   8  -3   7  164.48    7.48   0
  -8   3  -7  181.95    7.76   0
   9  -3   7   -0.76    7.46   0
  -9   3  -7   -0.86    7.41   0
  10  -3   7   -7.59    8.26   0
 -10   3  -7   -1.48    8.20   0
  14   2  -7   40.11   12.15   0
  14   2  -7   41.88    8.90   0
  13   2  -7  198.29    9.26   0
  13   2  -7  193.42   12.22   0
  12   2  -7   97.38    8.09   0
  12   2  -7  109.61   10.31   0
  11   2  -7  272.04   10.99   0
  11   2  -7  259.01   11.07   0
  10   2  -7   55.99    6.76   0
  10   2  -7   66.25    9.79   0
   9   2  -7  225.33   10.19   0
   9   2  -7  239.91   10.00   0
   8   2  -7  232.56   10.18   0
   8   2  -7  193.67   10.31   0
   7   2  -7  127.28   11.36   0
   7   2  -7  132.53   11.78   0
   7   2  -7  131.87    6.85   0
   6   2  -7   61.55    6.35   0
   6   2  -7   56.46   10.66   0
   6   2  -7   59.47   10.77   0
   5   2  -7 2028.23   14.18   0
   5   2  -7 1866.16   29.30   0
   5   2  -7 1744.90   26.82   0
  -4  -2   7  582.53    9.05   0
   4   2  -7  554.38    9.06   0
   4   2  -7  499.67   15.23   0
   3   2  -7  441.51   12.06   0
   3   2  -7  472.64    8.87   0
  -3  -2   7  435.94   12.10   0
  -3  -2   7  517.39   10.93   0
  -2  -2   7  235.82    7.88   0
   2   2  -7  296.86   10.09   0
  -2  -2   7  344.13    8.18   0
   2   2  -7  338.61    8.25   0
   1   2  -7  635.90   11.44   0
  -1  -2   7  678.76   11.64   0
   0   2  -7 1928.51   14.36   0
   0  -2   7 2207.73   16.50   0
   0  -2   7 2157.30   16.11   0
  -1   2  -7  174.32    6.32   0
   1  -2   7  184.05    7.91   0
   1  -2   7  182.27    8.35   0
   2  -2   7  236.34   10.58   0
   2  -2   7  206.38    6.93   0
  -2   2  -7  207.97    6.68   0
   3  -2   7    6.83    5.93   0
   3  -2   7   -4.96    6.84   0
  -3   2  -7    3.50    5.51   0
   4  -2   7   53.91    6.06   0
  -4   2  -7  100.75    8.30   0
   5  -2   7   25.65    6.05   0
  -5   2  -7   32.10    8.32   0
   6  -2   7  419.53    8.01   0
  -6   2  -7  442.78    7.84   0
   7  -2   7  235.07    7.52   0
  -7   2  -7  250.22    7.40   0
   8  -2   7  271.66   10.77   0
  -8   2  -7  276.98   10.63   0
   9  -2   7  218.41   11.53   0
  -9   2  -7  217.48   11.67   0
  14   1  -7   10.21    8.50   0
  14   1  -7   -7.92   11.37   0
  13   1  -7   55.49    7.81   0
  13   1  -7   43.65    7.82   0
  12   1  -7   48.70   10.39   0
  12   1  -7   52.49    7.37   0
  11   1  -7  338.85    8.68   0
  11   1  -7  317.82   11.33   0
  10   1  -7  609.44    9.61   0
  10   1  -7  539.37   10.05   0
   9   1  -7   86.77    6.94   0
   9   1  -7   96.68    9.52   0
   8   1  -7  165.71    7.41   0
   8   1  -7  132.25    7.66   0
   8   1  -7  140.78    7.54   0
   7   1  -7  107.82    7.21   0
   7   1  -7   85.10    7.03   0
   7   1  -7   95.73    9.50   0
   6   1  -7   33.83    8.60   0
   6   1  -7   49.18    8.81   0
   6   1  -7   39.83    9.42   0
  -5  -1   7   18.85    5.84   0
   5   1  -7   17.41    6.09   0
   5   1  -7   15.97    7.74   0
   4   1  -7   55.72    8.77   0
  -4  -1   7   52.71    8.60   0
   4   1  -7   48.37    8.13   0
  -4  -1   7   55.73    8.55   0
  -3  -1   7  416.92   10.86   0
  -3  -1   7  484.29   10.95   0
   3   1  -7  455.63   11.04   0
   3   1  -7  419.61   10.86   0
  -2  -1   7 1011.09   12.81   0
   2   1  -7  902.36   12.76   0
   2   1  -7 1013.55   13.01   0
   1   1  -7  363.43    9.52   0
  -1  -1   7  372.40    8.41   0
  -1  -1   7  334.33    7.67   0
   0   1  -7  331.20    9.30   0
   0  -1   7  338.10    8.39   0
   0  -1   7  321.61    9.21   0
  -1   1  -7   69.14    7.85   0
   1  -1   7   70.74    7.17   0
   1  -1   7   77.56    8.02   0
  -2   1  -7  198.67    6.46   0
   2  -1   7  185.85    6.36   0
  -3   1  -7  626.46   10.10   0
   3  -1   7  527.03    7.98   0
   4  -1   7   64.35    5.96   0
  -4   1  -7   63.45    8.29   0
   5  -1   7   28.21    5.93   0
  -5   1  -7   25.72    5.73   0
   6  -1   7  370.81    9.99   0
  -6   1  -7  388.29    7.73   0
   7  -1   7   95.89    6.88   0
  -7   1  -7  110.74    6.86   0
   8  -1   7   21.79   10.12   0
  -8   1  -7   14.57    6.98   0
   9  -1   7  144.47    8.52   0
  -9   1  -7  154.86    8.63   0
  15   0  -7    0.57    9.06   0
  15   0  -7   -3.57   12.66   0
  14   0  -7    5.83   11.45   0
  14   0  -7    5.41   11.30   0
  13   0  -7   20.34   10.68   0
  13   0  -7   22.87   10.44   0
  12   0  -7   19.61    7.05   0
  12   0  -7    5.67    6.88   0
  11   0  -7    9.65    9.35   0
  11   0  -7   -1.03    6.77   0
  10   0  -7  715.06   12.32   0
  10   0  -7  663.47   12.67   0
   9   0  -7  362.98   10.83   0
   9   0  -7  329.47   10.97   0
   8   0  -7  898.88   12.64   0
   8   0  -7  729.04   11.38   0
   8   0  -7  849.84   13.80   0
   7   0  -7  562.14    9.55   0
   7   0  -7  503.80   12.37   0
   7   0  -7  522.52   11.67   0
   6   0  -7   -0.16    6.08   0
   6   0  -7    3.23    7.94   0
   5   0  -7  190.02    9.88   0
   5   0  -7  175.64    9.00   0
  -5   0   7  189.55    7.25   0
   4   0  -7  121.10    8.64   0
  -4   0   7  213.07    9.27   0
   4   0  -7  201.31    7.50   0
  -3   0   7  165.92    6.95   0
   3   0  -7  165.94    7.32   0
   3   0  -7   96.64    6.48   0
  -2   0   7  378.70    8.44   0
  -2   0   7  411.82    9.73   0
   2   0  -7  355.35    7.81   0
  -1   0   7 1286.06   12.78   0
  -1   0   7 1329.65   13.96   0
   1   0  -7 1142.43   11.21   0
   0   0  -7 1195.39   10.79   0
   0   0   7 1297.64   12.06   0
   0   0   7 1242.47   10.82   0
  -1   0  -7 1182.77   11.91   0
   1   0   7 1131.99   10.19   0
  -2   0  -7  416.84    7.45   0
   2   0   7  435.10    9.51   0
  -3   0  -7  556.25    9.67   0
   3   0   7  525.28    7.79   0
  -4   0  -7  224.04    6.81   0
   4   0   7  249.97    8.95   0
   5   0   7  103.76    6.36   0
  -5   0  -7  114.76    8.72   0
   6   0   7   33.97    8.93   0
  -6   0  -7   23.53    6.30   0
   7   0   7   48.56    6.88   0
  -7   0  -7   54.67    6.80   0
   8   0   7    8.04    7.54   0
  -8   0  -7   21.67    7.47   0
   9   0   7   68.06    8.52   0
  -9   0  -7   66.92   11.82   0
  15  -1  -7   83.69   12.69   0
  15  -1  -7   65.91   12.85   0
  14  -1  -7   87.15   11.44   0
  14  -1  -7   93.75   11.78   0
  13  -1  -7   53.83   10.68   0
  13  -1  -7   58.34   10.68   0
  12  -1  -7    2.30    9.97   0
  12  -1  -7    1.50    9.95   0
  11  -1  -7   83.32   10.04   0
  11  -1  -7   97.56    9.89   0
  10  -1  -7  247.82   10.22   0
  10  -1  -7  246.87   10.63   0
   9  -1  -7   23.79    8.73   0
   9  -1  -7   19.73    6.52   0
   9  -1  -7   23.96    6.64   0
   8  -1  -7  187.40    9.79   0
   8  -1  -7  159.77    7.23   0
   8  -1  -7  169.76    9.78   0
   7  -1  -7 1125.72   14.13   0
   7  -1  -7 1046.26   13.46   0
  -6   1   7  595.45    9.47   0
   6  -1  -7  581.32   11.70   0
   6  -1  -7  553.25   10.98   0
   5  -1  -7 1496.59   13.53   0
   5  -1  -7 1530.18   15.08   0
  -5   1   7 1714.94   14.96   0
   4  -1  -7  101.10    6.31   0
  -4   1   7  142.24    7.10   0
   4  -1  -7  133.11    7.48   0
  -4   1   7  107.79    6.28   0
  -3   1   7   53.74    8.02   0
  -3   1   7   37.17    8.93   0
   3  -1  -7   47.00    7.98   0
  -2   1   7  388.00   10.69   0
  -2   1   7  361.51    9.27   0
   2  -1  -7  337.23    7.46   0
  -1   1   7   35.20    5.76   0
  -1   1   7   34.11    6.48   0
   1  -1  -7   32.63    5.50   0
   0   1   7   31.35    7.72   0
   0  -1  -7   27.59    5.60   0
  -1  -1  -7  558.81    8.02   0
   1   1   7  621.09    9.97   0
  -2  -1  -7  727.83    8.55   0
   2   1   7  825.77   10.60   0
  -3  -1  -7  305.31    7.04   0
   3   1   7  356.21    9.10   0
  -4  -1  -7  287.39    7.05   0
   4   1   7  339.65    9.07   0
  -5  -1  -7  101.84    8.77   0
   5   1   7  100.87    6.46   0
   6   1   7  243.48    7.45   0
  -6  -1  -7  225.68    7.22   0
   7   1   7   44.67    9.92   0
  -7  -1  -7   55.28    9.97   0
   8   1   7   12.04    7.76   0
  -8  -1  -7   -2.19    7.81   0
  15  -2  -7   63.70   12.19   0
  15  -2  -7   68.69   12.54   0
  14  -2  -7   29.62    8.02   0
  14  -2  -7   40.46   11.12   0
  13  -2  -7  270.57   11.38   0
  13  -2  -7  258.54   11.33   0
  12  -2  -7  291.56   11.50   0
  12  -2  -7  254.73   11.42   0
  11  -2  -7  230.28   10.78   0
  11  -2  -7  181.11    8.00   0
  10  -2  -7  176.41   10.14   0
  10  -2  -7  158.44    7.54   0
  10  -2  -7  150.37    7.42   0
   9  -2  -7  442.63    9.47   0
   9  -2  -7  388.01    8.91   0
   9  -2  -7  398.76   10.80   0
   8  -2  -7  114.37    7.29   0
   8  -2  -7  114.59    9.39   0
   8  -2  -7  114.92    9.06   0
   7  -2  -7  301.80    9.85   0
   7  -2  -7  326.32   10.79   0
   6  -2  -7  640.15   10.29   0
  -6   2   7  673.43    9.95   0
   6  -2  -7  663.91   11.43   0
  -5   2   7 2224.23   15.70   0
   5  -2  -7 2027.61   15.74   0
   5  -2  -7 2117.88   17.49   0
  -5   2   7 1972.44   14.56   0
   4  -2  -7 1973.34   14.02   0
  -4   2   7 2311.37   16.91   0
  -4   2   7 2073.96   14.50   0
  -3   2   7  304.40    7.16   0
  -3   2   7  326.85    8.22   0
   3  -2  -7  296.91    7.29   0
  -2   2   7  804.10   10.26   0
  -2   2   7  766.83    9.08   0
   2  -2  -7  757.40    9.15   0
  -1   2   7   25.78    7.60   0
   1  -2  -7   21.41    5.64   0
   0   2   7  135.19    6.20   0
   0  -2  -7  130.63    6.20   0
  -1  -2  -7   27.60    5.77   0
   1   2   7   34.17    7.85   0
  -2  -2  -7  262.34    8.89   0
   2   2   7  238.58    6.80   0
  -3  -2  -7  148.11    8.55   0
   3   2   7  151.99    8.62   0
  -4  -2  -7  774.45   10.80   0
   4   2   7  783.98   10.88   0
   5   2   7  205.61    7.32   0
  -5  -2  -7  210.34    7.27   0
   6   2   7  173.84    7.30   0
  -6  -2  -7  180.92    7.41   0
   7   2   7  110.24   10.61   0
  -7  -2  -7  111.62   10.85   0
  -8  -2  -7   38.87    8.54   0
   8   2   7   25.37    8.12   0
  15  -3  -7  155.18   12.65   0
  15  -3  -7  174.06   13.15   0
  14  -3  -7   63.97    8.48   0
  14  -3  -7   66.62    8.24   0
  13  -3  -7  134.15    8.58   0
  13  -3  -7  116.60    8.17   0
  12  -3  -7  390.65   12.04   0
  12  -3  -7  322.97    8.93   0
  11  -3  -7  230.26    8.15   0
  11  -3  -7  277.97    8.83   0
  11  -3  -7  252.94    8.28   0
  10  -3  -7  422.48   10.87   0
  10  -3  -7  450.82    9.79   0
  10  -3  -7  418.92    8.94   0
   9  -3  -7   14.86    9.26   0
   9  -3  -7   14.60    6.41   0
   9  -3  -7    1.21    6.31   0
   8  -3  -7   97.53    9.97   0
   8  -3  -7   86.83    6.76   0
   7  -3  -7   52.31    9.74   0
  -7   3   7   61.47    9.01   0
   7  -3  -7   51.61    8.36   0
  -6   3   7  298.45    8.06   0
   6  -3  -7  298.80    9.72   0
   5  -3  -7  237.56    7.19   0
  -5   3   7  265.77    9.33   0
  -5   3   7  240.07    7.94   0
   4  -3  -7  846.14   11.06   0
  -4   3   7  890.20   12.64   0
  -4   3   7  776.10    9.29   0
  -3   3   7  239.03    6.62   0
  -3   3   7  249.71    9.91   0
   3  -3  -7  241.54    6.98   0
  -2   3   7 1278.51   12.22   0
   2  -3  -7 1357.38   10.97   0
  -2   3   7 1328.76   10.87   0
  -1   3   7  388.98    7.39   0
   1  -3  -7  464.15    9.43   0
   0   3   7   46.08    5.68   0
   0  -3  -7   56.17    8.06   0
   1   3   7   46.50    8.03   0
  -1  -3  -7   49.25    7.96   0
  -2  -3  -7  144.73    6.34   0
   2   3   7  156.13    8.71   0
   3   3   7    2.39    8.35   0
  -3  -3  -7    4.54    5.81   0
   4   3   7   36.01    8.90   0
  -4  -3  -7   25.34    6.22   0
  -5  -3  -7  189.79    7.33   0
   5   3   7  192.73    7.39   0
  -6  -3  -7  166.89    7.80   0
   6   3   7  163.31    7.80   0
  -7  -3  -7  232.80   11.70   0
   7   3   7  214.53    8.75   0
  15  -4  -7    8.59    8.40   0
  15  -4  -7   10.17    8.63   0
  14  -4  -7   63.65    8.67   0
  14  -4  -7   71.12    8.09   0
  13  -4  -7   81.15   10.73   0
  13  -4  -7   63.31    7.82   0
  13  -4  -7   60.99    7.79   0
  12  -4  -7  349.98   11.18   0
  12  -4  -7  369.68   12.33   0
  12  -4  -7  326.43    8.67   0
  11  -4  -7  137.09    9.94   0
  11  -4  -7  150.90   10.70   0
  11  -4  -7  138.17    7.65   0
  10  -4  -7  342.50   11.76   0
  10  -4  -7  296.23    8.12   0
  10  -4  -7  322.24    8.36   0
   9  -4  -7  445.53   10.08   0
   9  -4  -7  401.12    8.40   0
   8  -4  -7  609.61   13.26   0
   8  -4  -7  556.28    9.01   0
  -7   4   7  575.92   10.00   0
   7  -4  -7  566.19   10.82   0
  -6   4   7    1.73    6.20   0
   6  -4  -7   -6.10    5.96   0
  -5   4   7   57.28    5.72   0
  -5   4   7   66.50    6.63   0
   5  -4  -7   62.85    5.82   0
   4  -4  -7  452.90    7.81   0
  -4   4   7  493.38    9.30   0
  -4   4   7  458.44    8.00   0
  -3   4   7  156.92    6.20   0
  -3   4   7  173.50    9.96   0
   3  -4  -7  147.02    6.31   0
   2  -4  -7  602.90   10.01   0
  -2   4   7  602.34    9.97   0
  -1   4   7  981.05    9.32   0
   1  -4  -7 1046.20   11.17   0
   0   4   7  777.20    8.71   0
   0  -4  -7  811.60   10.67   0
   1   4   7  900.62    9.05   0
  -1  -4  -7  932.95   10.97   0
   2   4   7  103.50    8.46   0
  -2  -4  -7  106.13    6.38   0
   3   4   7    8.78    6.03   0
  -3  -4  -7   11.12    6.04   0
   4   4   7   70.44    6.59   0
  -4  -4  -7   64.36    6.60   0
  -5  -4  -7    7.48    6.64   0
   5   4   7   -4.98    6.87   0
  -6  -4  -7   -2.09    7.80   0
   6   4   7   -6.07   10.89   0
  15  -5  -7   40.05   12.18   0
  15  -5  -7   26.43   11.90   0
  15  -5  -7   30.29    8.51   0
  14  -5  -7   16.22    7.75   0
  14  -5  -7   12.03   11.18   0
  14  -5  -7    7.32   10.94   0
  13  -5  -7   60.31   10.97   0
  13  -5  -7   61.56    7.55   0
  13  -5  -7   71.49   10.55   0
  12  -5  -7   62.60   10.52   0
  12  -5  -7   55.82   10.13   0
  12  -5  -7   44.89    7.29   0
  11  -5  -7  201.39    7.80   0
  11  -5  -7  228.26   11.96   0
  11  -5  -7  194.48   10.32   0
  10  -5  -7  308.55   12.06   0
  10  -5  -7  268.72    7.92   0
  10  -5  -7  300.49   10.18   0
   9  -5  -7  362.59   10.15   0
   8  -5  -7  127.34    6.99   0
   7  -5  -7  788.89    9.68   0
  -7   5   7  920.21   14.03   0
  -6   5   7  757.66   12.80   0
   6  -5  -7  682.09   11.00   0
   5  -5  -7   99.25    6.15   0
  -5   5   7  106.24    9.68   0
  -5   5   7  108.90    8.97   0
   4  -5  -7   10.60    8.27   0
  -4   5   7    0.72    6.81   0
  -4   5   7    4.07    7.95   0
  -3   5   7  386.06    7.28   0
  -3   5   7  396.69    8.88   0
   3  -5  -7  406.78    7.41   0
   2  -5  -7   79.72    6.12   0
  -2   5   7   44.88    5.78   0
   1  -5  -7   66.38    6.23   0
  -1   5   7   80.29    6.01   0
   0  -5  -7  109.81    6.23   0
   0   5   7  119.79    8.58   0
  -1  -5  -7  499.11    7.74   0
   1   5   7  539.06    9.82   0
  -2  -5  -7  668.58    8.50   0
   2   5   7  682.91    8.58   0
  -3  -5  -7  147.74    9.30   0
   3   5   7  102.62    6.72   0
  -4  -5  -7  111.97    9.76   0
   4   5   7  119.39    7.39   0
  -5  -5  -7    7.07   10.73   0
   5   5   7    8.27   10.63   0
  -6  -5  -7   17.03   11.47   0
   6   5   7    8.46   11.38   0
  15  -6  -7   47.22   12.95   0
  15  -6  -7   37.07    8.93   0
  15  -6  -7   53.62   12.27   0
  14  -6  -7    3.89   11.39   0
  14  -6  -7    5.77    7.81   0
  14  -6  -7    1.97   11.08   0
  13  -6  -7   26.33   10.98   0
  13  -6  -7   37.92   10.43   0
  13  -6  -7   24.06   10.49   0
  12  -6  -7    7.38    6.93   0
  12  -6  -7    9.99   10.29   0
  12  -6  -7   -1.68    9.85   0
  11  -6  -7   72.13    6.92   0
  11  -6  -7   62.33    6.94   0
  10  -6  -7   58.10    9.06   0
   9  -6  -7  625.98   11.20   0
  -8   6   7  200.97   10.36   0
   8  -6  -7  176.91    7.01   0
  -7   6   7  304.59   10.87   0
   7  -6  -7  246.57    7.17   0
  -6   6   7  397.41   11.32   0
   6  -6  -7  331.67    7.57   0
  -6   6   7  366.88    7.60   0
  -5   6   7    8.67    8.08   0
  -5   6   7   14.55    9.38   0
   5  -6  -7    3.39    5.81   0
   4  -6  -7  475.63    7.96   0
  -4   6   7  552.06   11.90   0
  -4   6   7  519.75    7.95   0
  -3   6   7   69.84    5.87   0
   3  -6  -7   67.79    6.05   0
  -2   6   7   51.33    6.02   0
   2  -6  -7   52.78    6.15   0
   1  -6  -7   26.12    5.73   0
  -1   6   7   18.26    5.87   0
   0  -6  -7  282.35    7.17   0
   0   6   7  254.15    7.06   0
  -1  -6  -7   75.18    8.73   0
   1   6   7   71.28    6.35   0
  -2  -6  -7  140.75    6.88   0
   2   6   7  152.54    9.29   0
  -3  -6  -7   52.86    7.22   0
   3   6   7   66.18    9.36   0
  -4  -6  -7  227.69    8.23   0
   4   6   7  249.68   10.97   0
  -5  -6  -7  217.52    8.80   0
   5   6   7  209.12    9.02   0
  15  -7  -7  134.53    9.22   0
  15  -7  -7  114.72    9.25   0
  14  -7  -7  140.28    8.62   0
  14  -7  -7  143.53    8.71   0
  13  -7  -7   89.44   10.87   0
  13  -7  -7   75.57    7.74   0
  12  -7  -7   93.88    7.57   0
  12  -7  -7   79.73    7.52   0
  11  -7  -7   18.00    9.77   0
  11  -7  -7   16.38    6.78   0
  10  -7  -7   64.69    6.78   0
   9  -7  -7    0.72    8.97   0
  -8   7   7   79.48    9.57   0
   8  -7  -7   63.21    6.72   0
   7  -7  -7  383.54    9.84   0
  -7   7   7  429.88   11.96   0
  -6   7   7  719.80   11.21   0
   6  -7  -7  728.75    9.23   0
  -6   7   7  765.56    9.31   0
  -5   7   7   70.04    6.32   0
  -5   7   7   74.18    7.18   0
   5  -7  -7   91.97    6.48   0
   4  -7  -7  204.74    6.83   0
  -4   7   7  210.69    6.78   0
  -4   7   7  172.37    7.72   0
  -3   7   7  335.04    9.15   0
   3  -7  -7  317.73    7.20   0
  -2   7   7  203.85    8.96   0
   2  -7  -7  229.38    8.99   0
  -1   7   7  229.50    7.03   0
   1  -7  -7  248.16    9.29   0
   0  -7  -7   66.74    6.45   0
   0   7   7   66.35    6.46   0
  -1  -7  -7   84.51    9.22   0
   1   7   7   76.73    6.67   0
  -2  -7  -7  104.65    7.43   0
   2   7   7  121.15    7.57   0
  -3  -7  -7   77.31    7.62   0
   3   7   7   84.17    7.77   0
  -4  -7  -7   28.48    7.99   0
   4   7   7   25.53    8.15   0
  15  -8  -7   26.47    8.74   0
  15  -8  -7   25.12   12.31   0
  14  -8  -7  149.51    9.07   0
  14  -8  -7  162.23    8.93   0
  13  -8  -7  197.62    8.71   0
  13  -8  -7  215.94   11.69   0
  12  -8  -7  361.90    9.35   0
  12  -8  -7  373.37   11.88   0
  11  -8  -7  106.57   10.09   0
  11  -8  -7  111.62    7.60   0
  10  -8  -7    6.09    6.51   0
   9  -8  -7    5.59    9.52   0
  -8   8   7    3.28    9.09   0
   8  -8  -7   -0.57    6.37   0
  -7   8   7   17.44    9.34   0
   7  -8  -7    9.16    6.37   0
   6  -8  -7  397.55    9.93   0
  -6   8   7  421.21   12.36   0
  -6   8   7  397.73    7.73   0
   5  -8  -7  618.28    8.79   0
  -5   8   7  624.97   10.77   0
  -5   8   7  703.24   11.08   0
  -4   8   7  644.37    8.53   0
   4  -8  -7  665.44    8.62   0
  -3   8   7  604.41    8.38   0
   3  -8  -7  633.20   10.41   0
  -2   8   7   86.14    6.43   0
   2  -8  -7   74.75    6.34   0
  -1   8   7  182.21    6.88   0
   1  -8  -7  168.90    7.12   0
   0   8   7   80.71    6.75   0
   0  -8  -7   69.91    7.04   0
  -1  -8  -7   29.56    9.73   0
   1   8   7   10.91    9.95   0
  -2  -8  -7   19.20    7.57   0
   2   8   7   22.03    7.57   0
  -3  -8  -7   80.99    8.06   0
   3   8   7   85.13    8.25   0
  14  -9  -7   46.66    8.31   0
  14  -9  -7   38.18    8.65   0
  13  -9  -7   34.31    7.78   0
  13  -9  -7   29.05   11.17   0
  12  -9  -7   79.93   10.75   0
  12  -9  -7  107.52   11.10   0
  11  -9  -7  433.42   11.50   0
  10  -9  -7  201.54    7.94   0
   9  -9  -7  237.54   10.31   0
  -8   9   7   23.25    9.88   0
   8  -9  -7   33.95    9.17   0
  -7   9   7   11.24    9.59   0
   7  -9  -7    5.00    6.36   0
   6  -9  -7   58.38    6.64   0
  -6   9   7   54.55   10.40   0
   5  -9  -7   19.53    8.97   0
  -5   9   7    3.76    6.15   0
  -5   9   7    2.79    9.99   0
  -4   9   7   -1.85    6.25   0
   4  -9  -7   10.38    6.30   0
   3  -9  -7  370.59   10.20   0
  -3   9   7  361.00    7.78   0
  -2   9   7  218.40    7.28   0
   2  -9  -7  219.21    7.37   0
  -1   9   7  196.52    7.44   0
   1  -9  -7  232.45   10.42   0
   0   9   7  130.72    7.64   0
   0  -9  -7  122.77   10.42   0
   1   9   7   23.25   10.53   0
  -1  -9  -7   18.07    7.67   0
   2   9   7  100.33   11.68   0
  -2  -9  -7   82.31    8.40   0
  14 -10  -7    9.42    8.43   0
  14 -10  -7   21.19   12.14   0
  13 -10  -7   27.78    8.22   0
  13 -10  -7   35.15    8.22   0
  12 -10  -7   13.37   10.80   0
  12 -10  -7   13.95    7.80   0
  11 -10  -7  227.76   11.18   0
  10 -10  -7  133.73    7.54   0
   9 -10  -7  354.82   11.06   0
  -8  10   7  454.23   14.39   0
   8 -10  -7  468.61   11.13   0
  -7  10   7  184.59   11.41   0
   7 -10  -7  169.76   10.14   0
   6 -10  -7  200.32   10.11   0
  -6  10   7  191.30   11.36   0
   5 -10  -7    6.17    6.46   0
  -5  10   7    3.00    7.60   0
  -5  10   7    2.73    6.51   0
  -4  10   7   -8.92    6.63   0
   4 -10  -7    3.81    6.66   0
  -3  10   7    0.23    9.57   0
   3 -10  -7   -5.35    9.52   0
   2 -10  -7   56.93    7.05   0
  -2  10   7   71.05   10.15   0
   1 -10  -7  100.14    7.91   0
  -1  10   7  104.41   10.49   0
   0  10   7  338.56    8.98   0
   0 -10  -7  305.09    8.98   0
  -1 -10  -7  129.21   11.82   0
   1  10   7  113.87   11.68   0
  13 -11  -7   21.06    8.59   0
  13 -11  -7   29.72   11.99   0
  12 -11  -7   18.25   11.49   0
  12 -11  -7    8.83    8.21   0
  11 -11  -7   71.17   11.34   0
  10 -11  -7   62.89    7.96   0
   9 -11  -7   21.52   10.21   0
  -8  11   7  187.03   14.94   0
   8 -11  -7  142.11    7.89   0
   7 -11  -7  151.63    8.19   0
  -7  11   7  178.84   12.29   0
   6 -11  -7  350.43    8.65   0
  -6  11   7  385.46   13.24   0
  -5  11   7  177.36   11.99   0
  -5  11   7  167.73    7.65   0
   5 -11  -7  150.55    7.73   0
  -4  11   7   -6.55    9.92   0
   4 -11  -7    2.62    7.29   0
  -3  11   7   13.59    7.32   0
   3 -11  -7   15.35   10.60   0
  -2  11   7    8.69    7.89   0
   2 -11  -7    9.54    7.76   0
   1 -11  -7    7.71    8.10   0
  -1  11   7    2.95   11.44   0
  12 -12  -7   67.39   12.25   0
  11 -12  -7   54.94   11.58   0
  10 -12  -7   32.58    8.12   0
   9 -12  -7   26.86    7.83   0
   8 -12  -7  121.90    8.35   0
  -8  12   7  119.00   15.46   0
   7 -12  -7   70.87   11.11   0
  -7  12   7   59.76   11.87   0
   6 -12  -7   48.23   10.97   0
  -6  12   7   36.51    8.60   0
  -5  12   7  217.06    8.74   0
  -5  12   7  249.79   13.36   0
   5 -12  -7  220.34   11.96   0
   4 -12  -7   97.89   11.63   0
  -4  12   7  105.38   11.63   0
  -3  12   7  134.40   12.03   0
   3 -12  -7  144.70   11.97   0
  10 -13  -7   20.75    8.77   0
   9 -13  -7   10.16    8.46   0
  -8  13   7    3.48   14.84   0
   8 -13  -7   -5.20   11.84   0
   7 -13  -7   32.29   12.18   0
  -7  13   7   28.37   12.76   0
  -6  13   7   15.52   12.73   0
   6 -13  -7   12.87    8.33   0
   1  15  -8   43.35   12.55   0
  -1 -15   8   18.35   13.21   0
  -1 -15   8   29.40   11.86   0
   0 -15   8  127.10   12.63   0
   0  15  -8  128.45   12.74   0
   0 -15   8  102.46   13.66   0
  -1  15  -8   72.40    8.96   0
   1 -15   8   66.65   12.04   0
   1 -15   8   61.01   12.65   0
  -2  15  -8   78.39    8.94   0
   2 -15   8   82.39   12.05   0
   2 -15   8   78.90   12.63   0
   3 -15   8   13.01   11.90   0
   4 -15   8   16.38   11.77   0
  -4  15  -8   24.08    8.84   0
   4 -15   8   21.32    8.80   0
   5 -15   8    6.41   12.46   0
   5 -15   8    6.37    8.85   0
   6 -15   8   34.26   12.69   0
   6 -15   8   40.32    8.84   0
  -4 -14   8    4.34   16.73   0
  -4 -14   8   -0.08   15.00   0
   3  14  -8   28.84   12.24   0
  -3 -14   8   29.07   14.42   0
  -3 -14   8   19.33   13.66   0
  -2 -14   8   66.26   12.96   0
  -2 -14   8   71.82   11.76   0
   2  14  -8   94.62   12.11   0
   1  14  -8   58.23   11.34   0
  -1 -14   8   46.15   12.20   0
  -1 -14   8   40.26   10.98   0
   0 -14   8   98.23   11.25   0
   0  14  -8  113.84   11.64   0
   0 -14   8   90.84   12.28   0
  -1  14  -8   23.40    7.82   0
   1 -14   8   38.27   10.82   0
   1 -14   8   28.97   11.49   0
   2 -14   8   90.07   11.45   0
  -2  14  -8  113.94   11.62   0
   2 -14   8   99.57   11.78   0
   3 -14   8   93.21   11.88   0
   4 -14   8    5.96    8.02   0
  -4  14  -8    6.60    7.96   0
   4 -14   8    6.14    7.99   0
   5 -14   8   13.83    8.08   0
   5 -14   8   13.80   11.62   0
   6 -14   8   30.13   11.90   0
   6 -14   8   21.41    8.44   0
   7 -14   8   17.19    8.72   0
  -5 -13   8    6.29   14.42   0
   5  13  -8    3.00    8.79   0
  -5 -13   8    3.41   15.79   0
  -4 -13   8   27.75   11.39   0
  -4 -13   8   26.77   15.28   0
   4  13  -8   32.81   11.83   0
   3  13  -8   51.93   11.51   0
  -3 -13   8   45.96   10.84   0
  -3 -13   8   38.69   12.19   0
   2  13  -8   18.82   11.01   0
  -2 -13   8    9.18   11.63   0
  -2 -13   8    6.54   10.04   0
  -1 -13   8    5.14    9.99   0
   1  13  -8   -2.51   10.56   0
  -1 -13   8    3.88   10.89   0
   0  13  -8  155.44   11.09   0
   0 -13   8  145.41   10.87   0
   0 -13   8  139.53   11.69   0
  -1  13  -8  185.57   11.31   0
   1 -13   8  151.45   11.36   0
   1 -13   8  163.00   11.25   0
  -2  13  -8  104.46    7.93   0
   2 -13   8   78.19    8.01   0
   2 -13   8   91.18   11.16   0
   3 -13   8  126.61    8.47   0
  -3  13  -8  165.68   11.22   0
   3 -13   8  142.66   11.42   0
   4 -13   8    5.91   11.09   0
   4 -13   8    2.64   10.59   0
   5 -13   8  117.87   11.47   0
   5 -13   8  126.86   10.96   0
   6 -13   8   52.32   11.29   0
   7 -13   8    3.53   11.60   0
   8 -13   8    7.36    8.42   0
   6  12  -8  172.92   12.79   0
  -6 -12   8  160.22   19.39   0
  -5 -12   8  252.45   16.56   0
   5  12  -8  269.17   12.25   0
  -5 -12   8  212.51   18.11   0
   4  12  -8   42.86    7.97   0
  -4 -12   8   24.41   10.75   0
  -4 -12   8   25.74   14.84   0
   3  12  -8   44.13    7.74   0
  -3 -12   8   38.58   10.04   0
  -3 -12   8   42.04   11.20   0
   2  12  -8    7.42    7.31   0
  -2 -12   8    2.62   10.16   0
  -2 -12   8    0.33   11.52   0
   1  12  -8    7.16    7.12   0
  -1 -12   8    3.29    9.38   0
  -1 -12   8    6.39   10.26   0
   0  12  -8    4.46   10.05   0
   0 -12   8   -1.25    9.71   0
   0 -12   8    4.80   10.18   0
   1 -12   8  225.55   11.11   0
  -1  12  -8  267.51   11.00   0
   1 -12   8  228.35   11.59   0
   2 -12   8  195.62   11.03   0
  -2  12  -8  252.48   11.26   0
   3 -12   8  332.84    9.59   0
  -3  12  -8  440.03   12.27   0
   3 -12   8  402.03   12.17   0
   4 -12   8   76.14   10.59   0
   5 -12   8  108.62    8.12   0
   6 -12   8  218.53    9.05   0
   7 -12   8   34.72   11.61   0
   7 -12   8   36.18    7.89   0
   8 -12   8   57.35    8.48   0
   8 -12   8   61.44   12.23   0
   9 -12   8    0.86   12.07   0
   9 -12   8    6.30   12.83   0
   8  11  -8   18.76   12.96   0
  -8 -11   8   10.01   23.09   0
   7  11  -8   11.16    8.32   0
  -7 -11   8   17.43   21.11   0
   6  11  -8    2.17    8.02   0
  -6 -11   8    5.82   17.52   0
   5  11  -8  158.58   11.26   0
  -5 -11   8  118.22   18.08   0
  -5 -11   8  128.83   16.67   0
   4  11  -8  173.21    8.23   0
  -4 -11   8  161.24   14.12   0
  -4 -11   8  159.22   17.21   0
   3  11  -8  264.75   11.06   0
  -3 -11   8  218.83   13.29   0
  -3 -11   8  202.59   14.66   0
   2  11  -8  141.82    7.41   0
  -2 -11   8  130.10   11.45   0
  -2 -11   8  125.78   10.38   0
   1  11  -8   -3.44    9.62   0
  -1 -11   8    3.68    9.28   0
  -1 -11   8   -1.43    9.82   0
   0 -11   8  138.98   10.27   0
   0  11  -8  156.18   10.40   0
   0 -11   8  141.44   10.74   0
  -1  11  -8   -6.80   10.02   0
   1 -11   8   36.44   10.14   0
   1 -11   8   24.62    9.83   0
   2 -11   8    1.69    6.73   0
  -2  11  -8    8.35    9.60   0
  -3  11  -8   83.05    7.53   0
   3 -11   8   83.17    9.86   0
   4 -11   8  212.17   10.98   0
   5 -11   8  216.32   11.64   0
   5 -11   8  189.81    8.31   0
   6 -11   8  384.14   10.62   0
   6 -11   8  353.26    9.30   0
   7 -11   8   31.24    7.69   0
   7 -11   8   38.71   11.33   0
   8 -11   8   48.39   12.02   0
   8 -11   8   50.58   11.39   0
   9 -11   8   43.76   12.83   0
   9 -11   8   48.89    8.64   0
   9  10  -8   18.63    9.02   0
   8  10  -8   53.11    8.70   0
   7  10  -8   19.63    7.93   0
   6  10  -8    8.77    7.27   0
   5  10  -8   25.55    9.93   0
  -4 -10   8  170.39   17.96   0
   4  10  -8  206.33   10.54   0
  -4 -10   8  168.73   18.87   0
   3  10  -8  184.61    7.55   0
  -3 -10   8  178.76   13.40   0
  -3 -10   8  174.92   14.08   0
  -2 -10   8  765.14   15.42   0
   2  10  -8  892.87   10.59   0
  -2 -10   8  774.49   16.72   0
   1  10  -8  594.78   11.70   0
  -1 -10   8  531.16   12.88   0
  -1 -10   8  508.30   13.47   0
   0  10  -8  478.70   11.29   0
   0 -10   8  433.17   11.84   0
   0 -10   8  393.13    9.83   0
   1 -10   8  203.84   10.53   0
  -1  10  -8  250.35   10.48   0
   1 -10   8  219.32   10.83   0
  -2  10  -8    9.56    9.53   0
   3 -10   8   69.09    9.92   0
  -3  10  -8   47.42    7.38   0
   3 -10   8   43.52    6.80   0
   4 -10   8   -4.03    7.08   0
   4 -10   8   -6.53    9.42   0
   5 -10   8   32.27    7.53   0
   5 -10   8   32.89    9.78   0
   6 -10   8  202.96    8.27   0
   6 -10   8  230.67   11.93   0
   7 -10   8  293.36    8.64   0
   7 -10   8  302.70   10.05   0
   8 -10   8  157.48   11.46   0
   8 -10   8  125.28    9.28   0
   9 -10   8  106.04    8.80   0
   9 -10   8  105.47   12.81   0
  10   9  -8   87.33   19.71   0
  10   9  -8   89.30    9.78   0
   9   9  -8   33.08   12.03   0
   8   9  -8  186.60    8.96   0
   7   9  -8   90.68    7.49   0
   6   9  -8   28.20    7.07   0
   5   9  -8   30.29    7.43   0
   4   9  -8  111.62    7.21   0
   3   9  -8   30.18    7.31   0
  -3  -9   8   41.15   14.87   0
  -3  -9   8   45.99   16.80   0
  -2  -9   8  124.18   10.15   0
   2   9  -8  152.48    7.54   0
  -2  -9   8  137.86   12.42   0
   1   9  -8  176.21    7.23   0
  -1  -9   8  158.11   10.14   0
  -1  -9   8  140.38   10.04   0
   0   9  -8  237.15    9.77   0
   0  -9   8  203.21   10.49   0
   0  -9   8  185.50    7.96   0
  -1   9  -8  927.26   13.01   0
   1  -9   8  839.32   13.41   0
  -2   9  -8  201.34   10.31   0
   2  -9   8  215.49    8.03   0
   3  -9   8   83.93   10.03   0
   3  -9   8   81.46    6.81   0
   4  -9   8   60.50    9.26   0
   4  -9   8   58.70    7.29   0
   5  -9   8   67.42    7.08   0
   5  -9   8   32.35    7.50   0
   6  -9   8    6.45    9.90   0
   6  -9   8   15.14    7.36   0
   7  -9   8  128.91    7.76   0
   7  -9   8  140.29    8.29   0
   8  -9   8   91.40   10.84   0
   8  -9   8  109.77    8.63   0
   9  -9   8  195.04    9.04   0
   9  -9   8  213.52   13.26   0
  10  -9   8  120.89    9.21   0
  10  -9   8  160.66   13.74   0
  10   8  -8  204.18    9.58   0
  10   8  -8  169.15   17.03   0
   9   8  -8   86.58   11.37   0
   9   8  -8   79.10   17.07   0
   8   8  -8   62.69    7.41   0
   7   8  -8  160.84    7.65   0
   6   8  -8  105.97    9.52   0
   5   8  -8  763.04   11.78   0
   4   8  -8   41.61    6.82   0
   3   8  -8   88.23    7.15   0
  -2  -8   8   91.79   12.00   0
   2   8  -8  110.08    9.68   0
  -2  -8   8   92.38   11.71   0
  -1  -8   8  115.04    9.66   0
  -1  -8   8  116.33    9.68   0
   1   8  -8  132.41    9.81   0
   0  -8   8   22.91    6.95   0
   0   8  -8   36.63    9.29   0
   0  -8   8   31.97    8.59   0
   1  -8   8  373.50   10.86   0
   1  -8   8  397.00    8.80   0
  -1   8  -8  431.46   11.01   0
   2  -8   8  487.61    9.19   0
  -2   8  -8  503.88    9.34   0
   3  -8   8  422.47    8.57   0
   3  -8   8  480.81    9.40   0
   4  -8   8  477.00   10.94   0
   4  -8   8  517.01    9.83   0
   5  -8   8   16.35    6.93   0
   5  -8   8    3.48    9.19   0
  -5   8  -8    3.11    6.62   0
   6  -8   8   94.69    7.09   0
   6  -8   8   97.23   10.96   0
  -6   8  -8  103.11    7.30   0
   7  -8   8    5.20   10.59   0
   7  -8   8    7.11    9.90   0
  -7   8  -8    5.83    7.09   0
   8  -8   8    6.44    7.43   0
   8  -8   8   24.60   11.28   0
  -8   8  -8    9.04    7.47   0
   9  -8   8   30.99   11.11   0
   9  -8   8   15.65   11.92   0
  -9   8  -8   21.12    7.93   0
  10  -8   8   95.89    9.21   0
  10  -8   8  114.59   13.34   0
 -10   8  -8  114.60   12.56   0
  11   7  -8   24.55   14.60   0
  11   7  -8   15.95    8.78   0
  10   7  -8    6.46    8.03   0
  10   7  -8    2.70   13.25   0
   9   7  -8   71.63   10.90   0
   9   7  -8   84.19   16.10   0
   8   7  -8   77.24    9.95   0
   7   7  -8  194.18   10.05   0
   6   7  -8   43.03    9.11   0
   5   7  -8  138.07    9.59   0
   4   7  -8  288.58    7.61   0
   3   7  -8  107.97    9.22   0
   2   7  -8  301.35   10.10   0
  -2  -7   8  270.59   15.25   0
  -2  -7   8  241.72   13.79   0
  -1  -7   8   15.11    8.47   0
   1   7  -8   22.23    6.34   0
  -1  -7   8   24.64    8.93   0
   0  -7   8   17.75    6.18   0
   0  -7   8   11.97    5.86   0
   0   7  -8   19.97    6.14   0
   1  -7   8  398.67    9.28   0
  -1   7  -8  440.04   11.55   0
   2  -7   8  575.07    9.78   0
   2  -7   8  489.72    9.04   0
  -2   7  -8  552.92   11.94   0
   3  -7   8   87.24    9.47   0
   3  -7   8   90.89    7.10   0
  -3   7  -8   77.25    6.63   0
   4  -7   8  372.64   10.11   0
   4  -7   8  398.58    9.08   0
  -4   7  -8  391.39   10.54   0
   5  -7   8  237.23    9.82   0
   5  -7   8  231.83    8.34   0
  -5   7  -8  239.73   10.08   0
   6  -7   8  234.99    9.98   0
  -6   7  -8  231.38   10.20   0
   6  -7   8  233.76    8.55   0
   7  -7   8   39.79    7.26   0
   7  -7   8   48.83    7.73   0
  -7   7  -8   50.27   10.08   0
   8  -7   8   16.54    7.42   0
   8  -7   8   25.73    8.24   0
  -8   7  -8   30.77    7.52   0
   9  -7   8   16.20   11.12   0
   9  -7   8   17.60    8.61   0
  -9   7  -8    3.56    7.98   0
  10  -7   8    9.97    8.76   0
  10  -7   8   20.90   12.86   0
 -10   7  -8    8.66    8.49   0
  12   6  -8   53.63    9.08   0
  12   6  -8   49.12   15.21   0
  11   6  -8   25.54    8.31   0
  11   6  -8   26.90   10.98   0
  10   6  -8    7.64   10.76   0
  10   6  -8    5.93   12.66   0
   9   6  -8   -2.86    7.11   0
   9   6  -8    0.13   13.42   0
   8   6  -8  -10.45    6.75   0
   7   6  -8  173.91    9.62   0
   6   6  -8  491.86   11.03   0
   5   6  -8  705.30    9.47   0
   4   6  -8  627.15    9.13   0
   3   6  -8  173.40    9.36   0
  -2  -6   8  364.14   15.50   0
  -2  -6   8  405.88   10.18   0
   2   6  -8  409.18    8.10   0
  -2  -6   8  343.75   14.59   0
  -1  -6   8  407.46   11.53   0
  -1  -6   8  432.37    8.45   0
   1   6  -8  461.24   10.49   0
   0  -6   8   60.29    6.86   0
   0   6  -8   80.04    6.93   0
   0   6  -8   72.35    9.50   0
   0  -6   8   76.96    8.59   0
   1  -6   8   36.34    7.11   0
  -1   6  -8   26.28    9.56   0
  -1   6  -8   36.55    8.93   0
   2  -6   8  538.77    9.02   0
   2  -6   8  585.23   10.42   0
  -2   6  -8  654.28   11.87   0
   3  -6   8  242.65   10.74   0
   3  -6   8  198.19    7.07   0
  -3   6  -8  208.29    9.59   0
   4  -6   8  256.93    9.34   0
   4  -6   8  269.15   10.79   0
  -4   6  -8  248.13    7.29   0
   5  -6   8  268.54    8.49   0
  -5   6  -8  274.88    9.96   0
   5  -6   8  283.86    9.74   0
   6  -6   8  259.88   10.16   0
   6  -6   8  272.11    8.94   0
  -6   6  -8  255.56    7.70   0
   7  -6   8  461.83   11.06   0
   7  -6   8  467.64   12.92   0
  -7   6  -8  410.16    8.42   0
   8  -6   8   69.11   10.41   0
   8  -6   8   78.26   11.79   0
  -8   6  -8   66.46    7.54   0
   9  -6   8   63.17    8.06   0
   9  -6   8   74.09   12.36   0
  -9   6  -8   76.92    8.22   0
  10  -6   8   -1.68    8.36   0
  10  -6   8    2.73   12.80   0
 -10   6  -8    2.97   11.71   0
  12   5  -8  261.78    9.82   0
  12   5  -8  254.51   13.77   0
  11   5  -8   93.35   11.54   0
  11   5  -8   79.76   11.18   0
  10   5  -8   75.17    7.93   0
  10   5  -8   64.62   12.41   0
   9   5  -8    5.46    9.97   0
   9   5  -8    2.79   13.34   0
   8   5  -8   13.29    6.63   0
   7   5  -8  133.45    9.70   0
   6   5  -8  126.67    6.99   0
   5   5  -8  163.32    9.60   0
   4   5  -8  846.12   10.16   0
  -3  -5   8  915.82   10.24   0
   3   5  -8  934.83   10.31   0
  -2  -5   8  124.18    6.75   0
   2   5  -8  140.41    9.32   0
  -2  -5   8  115.23   10.92   0
  -1  -5   8  595.16    9.14   0
   1   5  -8  594.86    9.13   0
   1   5  -8  552.42   13.01   0
  -1  -5   8  540.59   11.94   0
   0  -5   8  271.08   10.22   0
   0  -5   8  253.56    9.49   0
   0   5  -8  246.55    7.84   0
   0   5  -8  238.35    7.98   0
   1  -5   8  380.07    9.31   0
  -1   5  -8  450.24   10.86   0
   2  -5   8   -4.62    8.02   0
   2  -5   8    0.14    9.95   0
  -2   5  -8    8.95    8.47   0
   3  -5   8  125.58    8.74   0
  -3   5  -8  109.51    6.51   0
   3  -5   8  110.68    7.56   0
   4  -5   8   25.44    5.99   0
   4  -5   8   21.18    9.83   0
  -4   5  -8   35.02    8.66   0
   5  -5   8  299.18   10.01   0
   5  -5   8  276.12    8.60   0
  -5   5  -8  304.04    7.70   0
   6  -5   8  122.88    7.28   0
   6  -5   8  128.18   10.84   0
  -6   5  -8  150.18    9.77   0
   7  -5   8  226.44    7.85   0
   7  -5   8  224.46   12.00   0
  -7   5  -8  221.70    7.97   0
   8  -5   8  148.90    7.90   0
   8  -5   8  173.73   12.07   0
  -8   5  -8  165.99    7.93   0
   9  -5   8  146.41    9.58   0
   9  -5   8  141.28   11.67   0
  -9   5  -8  155.94   11.68   0
  13   4  -8   -2.61   12.44   0
  13   4  -8    8.09   11.70   0
  12   4  -8   73.79   11.57   0
  12   4  -8   81.27   11.24   0
  11   4  -8  129.34    8.36   0
  11   4  -8  118.96   12.87   0
  10   4  -8  326.42   11.31   0
  10   4  -8  281.70   12.13   0
   9   4  -8  684.09    9.70   0
   9   4  -8  626.10   16.89   0
   8   4  -8   16.22    6.30   0
   8   4  -8   12.04   15.36   0
   8   4  -8   13.08   14.47   0
   7   4  -8  192.54    7.43   0
   6   4  -8   -3.07    6.80   0
   5   4  -8   26.07    6.33   0
   4   4  -8    5.17    8.73   0
   3   4  -8  800.02    9.98   0
  -3  -4   8  713.66   26.45   0
  -3  -4   8  807.62   11.78   0
  -2  -4   8  252.86   10.06   0
   2   4  -8  255.38    7.92   0
   2   4  -8  241.35   11.28   0
  -2  -4   8  224.69   10.28   0
  -1  -4   8 1366.61   13.62   0
   1   4  -8 1354.99   13.60   0
  -1  -4   8 1244.53   15.07   0
   1   4  -8 1163.91   13.87   0
   0  -4   8 1154.06   11.65   0
   0   4  -8 1136.24   13.51   0
   1  -4   8  617.88    9.56   0
   1  -4   8  545.59    8.86   0
  -1   4  -8  585.50    9.18   0
   2  -4   8  615.35    9.87   0
   2  -4   8  617.00   10.68   0
  -2   4  -8  597.20    8.85   0
   3  -4   8  132.44    6.85   0
   3  -4   8  140.17    7.53   0
  -3   4  -8  134.99    9.31   0
   4  -4   8  619.75    8.70   0
   4  -4   8  554.70    9.70   0
  -4   4  -8  664.07   10.71   0
   5  -4   8   27.78    8.78   0
   5  -4   8   20.25    6.99   0
  -5   4  -8   14.42    6.16   0
   6  -4   8  217.34    7.48   0
   6  -4   8  174.59   11.39   0
  -6   4  -8  253.26    9.80   0
   7  -4   8  173.46    7.60   0
   7  -4   8  197.04   11.70   0
  -7   4  -8  194.13   10.31   0
   8  -4   8  186.07    8.11   0
   8  -4   8  197.09    9.18   0
  -8   4  -8  213.87    8.08   0
   9  -4   8   30.77    7.87   0
   9  -4   8   38.37    8.89   0
  -9   4  -8   38.05    7.90   0
  13   3  -8   -0.17   11.97   0
  13   3  -8    1.70   11.24   0
  12   3  -8   18.68   11.18   0
  12   3  -8   16.54    7.36   0
  11   3  -8   48.93    7.61   0
  11   3  -8   47.50    9.85   0
  10   3  -8   90.16    7.73   0
  10   3  -8   83.94   10.05   0
   9   3  -8  497.12    9.14   0
   9   3  -8  475.33   14.77   0
   8   3  -8  326.08   14.45   0
   8   3  -8  362.41    8.10   0
   8   3  -8  330.28   15.03   0
   7   3  -8  927.12   10.47   0
   6   3  -8  585.80    9.04   0
   5   3  -8  105.00    6.86   0
  -4  -3   8   68.51    6.55   0
   4   3  -8   68.68    6.68   0
  -3  -3   8  190.75    9.54   0
   3   3  -8  184.61    7.52   0
  -3  -3   8  185.08   11.49   0
   3   3  -8  176.15   11.68   0
  -2  -3   8  129.20    8.72   0
  -2  -3   8  134.79    7.13   0
   2   3  -8  121.32    7.01   0
   2   3  -8  124.74    9.39   0
  -1  -3   8  401.85    8.72   0
   1   3  -8  377.83    8.66   0
   1   3  -8  348.34    8.16   0
   0  -3   8 1726.21   15.10   0
   0  -3   8 1648.34   14.56   0
   0   3  -8 1512.82   13.04   0
   1  -3   8 1022.22   12.91   0
   1  -3   8  856.77    9.96   0
  -1   3  -8  907.69   10.22   0
   2  -3   8  570.08    9.41   0
   2  -3   8  592.00   10.39   0
  -2   3  -8  539.74    8.40   0
   3  -3   8   11.99    9.67   0
   3  -3   8   36.98    8.55   0
  -3   3  -8   46.07    8.50   0
   4  -3   8  102.10    9.97   0
   4  -3   8   97.03    8.37   0
  -4   3  -8   96.61    6.55   0
   5  -3   8  257.89    9.55   0
   5  -3   8  238.89    8.56   0
  -5   3  -8  250.60    7.21   0
   6  -3   8    1.65    6.55   0
   6  -3   8    4.03    7.88   0
  -6   3  -8   -7.59    9.18   0
   7  -3   8    6.25    9.48   0
  -7   3  -8   -2.00    6.85   0
   8  -3   8  178.16   11.00   0
  -8   3  -8  189.05   11.06   0
   9  -3   8   82.09   11.63   0
  -9   3  -8   72.02    8.43   0
  14   2  -8   54.21   12.73   0
  14   2  -8   52.05   12.38   0
  13   2  -8   17.75   11.35   0
  13   2  -8   19.21   10.71   0
  12   2  -8   52.71   10.82   0
  12   2  -8   43.47   10.35   0
  11   2  -8   19.62   10.12   0
  11   2  -8   23.10    9.37   0
  10   2  -8   81.91   10.71   0
  10   2  -8   87.65    9.86   0
   9   2  -8  216.67    7.86   0
   9   2  -8  197.12   10.24   0
   9   2  -8  186.77   10.85   0
   8   2  -8  184.65    7.61   0
   8   2  -8  187.99   12.28   0
   8   2  -8  191.96   12.76   0
   7   2  -8  435.87    8.39   0
   7   2  -8  400.66   14.65   0
   7   2  -8  399.17   14.98   0
   6   2  -8 1256.79   22.12   0
   6   2  -8 1384.22   12.02   0
   6   2  -8 1304.06   23.82   0
  -5  -2   8  844.78   11.53   0
   5   2  -8  776.56    9.86   0
   5   2  -8  703.78   17.14   0
   4   2  -8  552.40    9.06   0
   4   2  -8  506.31   12.99   0
  -4  -2   8  556.68    8.73   0
  -4  -2   8  559.07   15.37   0
  -3  -2   8   84.52    6.38   0
   3   2  -8   77.12    8.66   0
   3   2  -8   81.32    6.95   0
  -3  -2   8   77.24    8.64   0
   2   2  -8   41.15    5.78   0
  -2  -2   8   73.89    8.01   0
  -2  -2   8  249.56    9.91   0
   2   2  -8  218.26    7.66   0
   1   2  -8  387.60    9.81   0
  -1  -2   8  372.63    8.19   0
   0   2  -8   23.01    5.78   0
   0  -2   8   21.69    9.54   0
   0  -2   8   18.84    5.80   0
  -1   2  -8  108.42    6.17   0
   1  -2   8  112.56    8.63   0
   1  -2   8  111.45    7.49   0
   2  -2   8  555.88    9.81   0
   2  -2   8  545.12    8.34   0
  -2   2  -8  567.98    8.45   0
   3  -2   8  671.45   12.36   0
   3  -2   8  628.10    8.69   0
  -3   2  -8  670.22    8.71   0
   4  -2   8  336.11    8.77   0
   4  -2   8  393.58    9.83   0
  -4   2  -8  382.41    9.60   0
   5  -2   8  443.92   10.14   0
  -5   2  -8  457.19   10.10   0
   6  -2   8   24.43    6.70   0
  -6   2  -8   22.57    6.63   0
   7  -2   8  123.40   10.07   0
  -7   2  -8  130.93    7.51   0
   8  -2   8   34.34    7.70   0
  -8   2  -8   44.58    7.68   0
   9  -2   8  -11.58    8.27   0
  -9   2  -8    6.59   11.64   0
  14   1  -8   91.98   12.19   0
  14   1  -8   96.72   12.12   0
  13   1  -8   32.84   11.07   0
  13   1  -8   24.85   10.80   0
  12   1  -8  252.62    8.74   0
  12   1  -8  228.19   11.25   0
  11   1  -8  393.75    8.99   0
  11   1  -8  379.53   11.96   0
  10   1  -8  109.12    9.88   0
  10   1  -8  114.10    9.81   0
  10   1  -8  106.15   10.08   0
   9   1  -8   20.22    9.24   0
   9   1  -8   21.91    9.46   0
   9   1  -8   25.35    9.24   0
   8   1  -8  232.05    7.86   0
   8   1  -8  194.70   10.46   0
   8   1  -8  203.76   10.49   0
   7   1  -8    6.00    6.45   0
   7   1  -8   11.15    9.04   0
   7   1  -8    9.90    8.31   0
   6   1  -8   62.49    6.47   0
   6   1  -8   51.15    8.39   0
  -5  -1   8  349.83    9.90   0
   5   1  -8  320.36   10.23   0
   5   1  -8  293.44   10.53   0
  -4  -1   8  949.94   14.49   0
  -4  -1   8 1063.44   12.42   0
   4   1  -8  948.35   10.62   0
   4   1  -8  924.21   14.19   0
  -3  -1   8 2218.54   14.44   0
   3   1  -8 1895.98   15.70   0
   3   1  -8 2278.39   16.26   0
  -3  -1   8 1866.98   15.59   0
  -2  -1   8  218.61    9.79   0
   2   1  -8  206.98    8.85   0
  -1  -1   8  273.01    8.89   0
  -1  -1   8  253.31    7.87   0
   1   1  -8  253.42    7.01   0
   0   1  -8    1.01    5.78   0
   0  -1   8    2.47    6.81   0
   0  -1   8    8.10    8.03   0
  -1   1  -8    5.07    5.77   0
   1  -1   8    1.99    9.99   0
   1  -1   8    6.24    5.71   0
   2  -1   8   10.82    7.18   0
   2  -1   8   17.82    5.96   0
  -2   1  -8   15.79    8.32   0
   3  -1   8  224.96    6.83   0
  -3   1  -8  213.14    6.71   0
   4  -1   8  443.47    9.94   0
  -4   1  -8  420.32    7.93   0
   5  -1   8  842.18   11.58   0
  -5   1  -8  778.69    9.51   0
   6  -1   8  236.48    9.91   0
  -6   1  -8  225.92    7.44   0
   7  -1   8   63.73    7.19   0
  -7   1  -8   73.14    7.36   0
   8  -1   8   59.59   11.32   0
  -8   1  -8   79.77    8.09   0
  15   0  -8   36.30    9.47   0
  15   0  -8   41.73   13.04   0
  14   0  -8  180.18    9.29   0
  14   0  -8  164.00    9.66   0
  13   0  -8   60.98   10.85   0
  13   0  -8   71.38   11.18   0
  12   0  -8   87.45   10.39   0
  12   0  -8   96.04   10.50   0
  11   0  -8  422.96   11.62   0
  11   0  -8  347.91    9.45   0
  10   0  -8   18.46    9.68   0
  10   0  -8   13.62   10.05   0
  10   0  -8   59.09    9.70   0
   9   0  -8  151.58   10.05   0
   9   0  -8  112.51    7.23   0
   9   0  -8  131.68    9.78   0
   8   0  -8   47.79    9.47   0
   8   0  -8   53.97    8.53   0
   8   0  -8   53.84    9.33   0
   7   0  -8  139.40    7.18   0
   7   0  -8  129.98    9.86   0
   7   0  -8  135.55    9.05   0
   6   0  -8   94.19   10.32   0
   6   0  -8  103.50    8.59   0
  -6   0   8  108.66    7.19   0
   5   0  -8  323.08    8.16   0
  -5   0   8  414.31   10.05   0
  -5   0   8  353.87    8.87   0
   5   0  -8  385.08    8.40   0
  -4   0   8  247.35    9.80   0
   4   0  -8  185.44    7.87   0
   4   0  -8  201.63    8.84   0
  -3   0   8  483.83   10.39   0
   3   0  -8  452.16   10.04   0
  -2   0   8  248.55    9.67   0
  -2   0   8  232.74    9.06   0
   2   0  -8  213.36    6.79   0
  -1   0   8  900.15   11.65   0
   1   0  -8  816.07    9.76   0
  -1   0   8  915.06   10.58   0
   0   0  -8  971.07   11.66   0
   0   0   8  990.98   13.18   0
   0   0   8  985.64   11.83   0
  -1   0  -8   18.11    6.01   0
   1   0   8   28.25   10.07   0
   1   0   8   19.78    5.79   0
  -2   0  -8   75.74    8.22   0
   2   0   8   65.01    8.21   0
  -3   0  -8   67.77    6.36   0
   3   0   8   65.05    6.26   0
  -4   0  -8   80.52    9.07   0
   4   0   8   79.17    8.90   0
   5   0   8   10.98    8.76   0
  -5   0  -8    5.45    6.41   0
   6   0   8  191.56   10.22   0
  -6   0  -8  175.41    7.40   0
   7   0   8  119.73    7.64   0
  -7   0  -8  144.33   10.67   0
   8   0   8  193.53    9.09   0
  -8   0  -8  212.31   11.95   0
  15  -1  -8    0.24   12.38   0
  15  -1  -8    3.10    8.49   0
  14  -1  -8    7.20    8.09   0
  14  -1  -8    4.35    7.94   0
  13  -1  -8   65.47   11.04   0
  13  -1  -8   65.90    7.91   0
  12  -1  -8  144.39    8.00   0
  12  -1  -8  159.65    8.07   0
  12  -1  -8  146.06    8.10   0
  11  -1  -8  465.27   11.80   0
  11  -1  -8  354.72    9.21   0
  11  -1  -8  423.15   12.00   0
  10  -1  -8   54.62    9.73   0
  10  -1  -8   41.83    6.83   0
  10  -1  -8   50.09    9.57   0
   9  -1  -8   17.40    9.39   0
   9  -1  -8   11.10    6.66   0
   9  -1  -8    7.57    6.32   0
   8  -1  -8  313.42    8.49   0
   8  -1  -8  293.43   11.11   0
   8  -1  -8  280.95    8.17   0
  -7   1   8  169.94    7.22   0
   7  -1  -8  158.49    7.62   0
   7  -1  -8  164.28    9.22   0
  -6   1   8  487.69   10.89   0
   6  -1  -8  388.76    8.48   0
   6  -1  -8  459.96   11.58   0
   5  -1  -8  201.72    7.04   0
  -5   1   8  284.18    8.36   0
   5  -1  -8  278.64   11.30   0
  -4   1   8 1060.63   12.64   0
  -4   1   8  953.51   12.04   0
   4  -1  -8  859.77   10.28   0
  -3   1   8  433.57    8.41   0
   3  -1  -8  432.00    9.83   0
  -3   1   8  409.50    7.87   0
  -2   1   8  371.35    8.28   0
  -2   1   8  319.96    7.58   0
   2  -1  -8  323.03    7.74   0
  -1   1   8   78.85    5.86   0
  -1   1   8   85.54    7.04   0
   1  -1  -8   94.75    8.20   0
   0   1   8 1086.84   11.73   0
   0  -1  -8  993.41    9.60   0
   0   1   8  947.61   10.71   0
  -1  -1  -8  230.25    8.90   0
   1   1   8  215.69    6.82   0
  -2  -1  -8   62.24    8.51   0
   2   1   8   49.22    6.05   0
  -3  -1  -8   35.22    5.78   0
   3   1   8   30.44    5.92   0
  -4  -1  -8   78.50    6.54   0
   4   1   8   87.30    9.09   0
  -5  -1  -8   18.81    8.89   0
   5   1   8    6.89    6.26   0
   6   1   8   44.97    7.21   0
  -6  -1  -8   35.67    7.25   0
   7   1   8   35.83   11.01   0
  -7  -1  -8   30.14    8.02   0
  15  -2  -8   -0.00    8.49   0
  15  -2  -8   -0.59   12.11   0
  14  -2  -8    6.63    7.72   0
  14  -2  -8    5.13    8.13   0
  13  -2  -8   13.03   10.32   0
  13  -2  -8    7.90    7.37   0
  13  -2  -8   14.90    7.33   0
  12  -2  -8   29.92   10.24   0
  12  -2  -8   18.97    7.26   0
  12  -2  -8    9.23    7.32   0
  11  -2  -8  484.87   12.06   0
  11  -2  -8  418.62    9.50   0
  11  -2  -8  364.92    9.12   0
  10  -2  -8  716.08   10.54   0
  10  -2  -8  844.92   11.36   0
  10  -2  -8  838.89   13.32   0
   9  -2  -8  486.27   11.79   0
   9  -2  -8  419.31    9.27   0
   9  -2  -8  403.37    8.81   0
   8  -2  -8  609.34   10.51   0
   8  -2  -8  612.64   12.02   0
  -7   2   8  199.10    7.32   0
   7  -2  -8  203.09   10.50   0
   7  -2  -8  194.53    9.12   0
  -6   2   8  713.98   10.25   0
   6  -2  -8  665.05    9.54   0
   6  -2  -8  729.05   13.14   0
   5  -2  -8  443.25   10.32   0
  -5   2   8  466.18    8.91   0
  -5   2   8  424.55    8.19   0
  -4   2   8  117.02    7.25   0
  -4   2   8  118.87    6.53   0
   4  -2  -8  122.29    8.74   0
  -3   2   8   31.63    8.90   0
   3  -2  -8   20.43    8.21   0
  -3   2   8   27.03    5.85   0
  -2   2   8  904.32   10.55   0
  -2   2   8  863.13    9.57   0
   2  -2  -8  800.10    9.36   0
  -1   2   8  493.40    7.83   0
   1  -2  -8  522.64    9.64   0
  -1   2   8  532.97   11.24   0
   0   2   8  824.31    8.94   0
   0  -2  -8  812.40    8.97   0
   1   2   8  362.19    7.49   0
  -1  -2  -8  430.26    9.39   0
   2   2   8  293.04    7.18   0
  -2  -2  -8  317.27    9.15   0
  -3  -2  -8  803.66   11.34   0
   3   2   8  734.26    9.04   0
  -4  -2  -8  187.34    9.44   0
   4   2   8  168.44    7.22   0
  -5  -2  -8   85.01    7.15   0
   5   2   8   86.88    6.91   0
   6   2   8    4.93    7.14   0
  -6  -2  -8   12.86   10.26   0
  -7  -2  -8   59.14    8.18   0
   7   2   8   58.18    8.28   0
  15  -3  -8   47.76   12.26   0
  15  -3  -8   45.22   11.87   0
  15  -3  -8   44.76   12.26   0
  14  -3  -8   39.58    7.81   0
  14  -3  -8   40.06   11.34   0
  14  -3  -8   29.65    7.95   0
  13  -3  -8   22.79   10.72   0
  13  -3  -8   25.98   10.43   0
  13  -3  -8    9.61   10.52   0
  12  -3  -8    2.41    9.83   0
  12  -3  -8   -0.74    6.87   0
  12  -3  -8   -0.69    6.80   0
  11  -3  -8   12.46    9.30   0
  11  -3  -8    9.49    6.64   0
  11  -3  -8    5.04    6.79   0
  10  -3  -8  105.58   10.08   0
  10  -3  -8   91.55    9.71   0
  10  -3  -8   77.77    6.86   0
   9  -3  -8   85.95    7.50   0
   9  -3  -8   72.09    9.44   0
   8  -3  -8  954.90   14.35   0
   8  -3  -8  830.02   10.38   0
  -7   3   8  803.23   13.20   0
   7  -3  -8  689.75   11.70   0
   7  -3  -8  731.27   11.76   0
   6  -3  -8  853.22   11.57   0
  -6   3   8  934.14   10.97   0
   5  -3  -8  580.61    8.86   0
  -5   3   8  703.82   11.83   0
  -5   3   8  630.58    8.88   0
  -4   3   8   35.07    8.99   0
  -4   3   8   38.42    6.07   0
   4  -3  -8   40.37    5.95   0
  -3   3   8  172.52    6.43   0
  -3   3   8  172.98   10.07   0
   3  -3  -8  177.24    8.56   0
  -2   3   8  138.32   10.08   0
   2  -3  -8  115.45    6.21   0
  -2   3   8  131.53    8.65   0
   1  -3  -8   11.69    5.71   0
  -1   3   8   16.54    5.64   0
   0   3   8  213.51    8.65   0
   0  -3  -8  201.02    6.80   0
   1   3   8  677.17   10.43   0
  -1  -3  -8  649.95    8.50   0
   2   3   8  192.45    6.94   0
  -2  -3  -8  228.97    9.39   0
   3   3   8  278.86    9.85   0
  -3  -3  -8  285.18    9.82   0
  -4  -3  -8  157.96    7.04   0
   4   3   8  146.64    7.20   0
  -5  -3  -8  144.92    7.80   0
   5   3   8  180.12   10.65   0
  -6  -3  -8  185.26   11.56   0
   6   3   8  153.59   11.66   0
  15  -4  -8   88.21   12.73   0
  15  -4  -8   68.82    8.64   0
  15  -4  -8   70.79    8.84   0
  14  -4  -8  163.94   12.23   0
  14  -4  -8  142.54    8.80   0
  14  -4  -8  148.86    8.81   0
  13  -4  -8  329.95   12.59   0
  13  -4  -8  303.40   11.53   0
  13  -4  -8  305.99   11.64   0
  12  -4  -8   23.39    7.41   0
  12  -4  -8   25.22    7.18   0
  12  -4  -8   29.22    7.21   0
  11  -4  -8   35.32    7.27   0
  11  -4  -8   22.12    7.03   0
  11  -4  -8   28.05    9.48   0
  10  -4  -8    1.29    9.75   0
  10  -4  -8   -1.13    6.57   0
  10  -4  -8    0.97    6.22   0
   9  -4  -8   70.83    8.98   0
   9  -4  -8   71.88   10.24   0
  -8   4   8    9.84    9.09   0
   8  -4  -8   -0.41    8.48   0
  -7   4   8  392.80   11.09   0
   7  -4  -8  362.07   10.13   0
  -6   4   8  714.12   11.15   0
  -6   4   8  680.55   10.43   0
   6  -4  -8  652.75    9.06   0
   5  -4  -8 1201.24   12.41   0
  -5   4   8 1217.32   12.29   0
  -5   4   8 1120.34   10.48   0
  -4   4   8  523.14   11.66   0
  -4   4   8  534.70   10.24   0
   4  -4  -8  461.68    8.03   0
  -3   4   8   79.34    6.02   0
  -3   4   8   79.54    7.35   0
   3  -4  -8   62.45    6.17   0
  -2   4   8  563.00    9.37   0
   2  -4  -8  558.23   10.29   0
  -2   4   8  561.64   10.06   0
   1  -4  -8  185.00    6.69   0
  -1   4   8  211.62    6.73   0
   0  -4  -8  188.75    6.62   0
   0   4   8  167.95    6.67   0
  -1  -4  -8   33.24    6.22   0
   1   4   8   36.97    6.07   0
   2   4   8  236.62    7.23   0
  -2  -4  -8  250.95    9.56   0
   3   4   8   87.46    6.69   0
  -3  -4  -8  103.53    9.29   0
  -4  -4  -8  157.46   10.09   0
   4   4   8  161.44   10.37   0
  -5  -4  -8   41.69    7.59   0
   5   4   8   37.10    7.69   0
  15  -5  -8   44.92    9.16   0
  15  -5  -8   44.72    8.68   0
  15  -5  -8   55.02   12.31   0
  14  -5  -8   10.21   11.23   0
  14  -5  -8    7.80    7.71   0
  14  -5  -8    7.67   11.22   0
  13  -5  -8  204.50   11.22   0
  13  -5  -8  193.17    9.66   0
  13  -5  -8  216.73   11.34   0
  12  -5  -8  279.64   12.71   0
  12  -5  -8  266.85    8.55   0
  12  -5  -8  246.94    8.36   0
  11  -5  -8  474.42   13.58   0
  11  -5  -8  428.27    9.22   0
  11  -5  -8  460.12   11.32   0
  10  -5  -8  357.40    8.40   0
   9  -5  -8   40.84    6.27   0
  -8   5   8   38.23    9.26   0
   8  -5  -8   39.57    6.14   0
  -7   5   8    7.66    8.86   0
   7  -5  -8    3.04    8.53   0
  -6   5   8    1.40    9.13   0
   6  -5  -8   -1.06    6.05   0
  -6   5   8   -4.78    8.43   0
   5  -5  -8  224.09    7.12   0
  -5   5   8  245.74   10.29   0
  -5   5   8  204.10    7.02   0
  -4   5   8  784.08   10.62   0
  -4   5   8  772.04   10.55   0
   4  -5  -8  747.52    9.04   0
  -3   5   8  174.27    8.05   0
   3  -5  -8  193.82    6.58   0
  -3   5   8  206.82    8.53   0
   2  -5  -8  554.20    8.22   0
  -2   5   8  555.04    8.12   0
   1  -5  -8   60.50    6.14   0
  -1   5   8   67.39    6.19   0
   0  -5  -8  103.49    6.61   0
   0   5   8  109.91    6.56   0
  -1  -5  -8  157.58    9.44   0
   1   5   8  129.10    6.73   0
  -2  -5  -8   -0.39    6.33   0
   2   5   8    2.51    6.27   0
  -3  -5  -8    8.53    6.77   0
   3   5   8    6.69    6.74   0
  -4  -5  -8  105.95    7.80   0
   4   5   8  109.04    7.97   0
  -5  -5  -8  143.00   11.84   0
   5   5   8  104.67   11.73   0
  15  -6  -8   25.27   13.01   0
  15  -6  -8   31.53   11.89   0
  15  -6  -8   32.10   12.10   0
  14  -6  -8   33.96    8.30   0
  14  -6  -8   33.37   11.87   0
  14  -6  -8   40.66   11.38   0
  13  -6  -8  101.19   12.13   0
  13  -6  -8  121.63   11.23   0
  13  -6  -8  108.32    7.92   0
  12  -6  -8  144.36    7.99   0
  12  -6  -8  134.51    7.97   0
  11  -6  -8  139.17   10.17   0
  11  -6  -8  163.32   10.40   0
  10  -6  -8  575.92    9.42   0
   9  -6  -8  151.65    7.07   0
  -8   6   8  296.93   10.87   0
   8  -6  -8  258.90    9.49   0
   7  -6  -8    9.17    6.19   0
  -7   6   8    8.25    9.16   0
   6  -6  -8   92.18    6.58   0
  -6   6   8   38.82    6.69   0
  -6   6   8   75.10    8.89   0
   5  -6  -8    5.34    8.76   0
  -5   6   8   11.87    6.85   0
  -5   6   8   14.24    6.01   0
  -4   6   8  109.16    7.70   0
  -4   6   8  118.42    6.30   0
   4  -6  -8  143.66    8.85   0
  -3   6   8   52.13    8.29   0
  -3   6   8   53.29    7.28   0
   3  -6  -8   55.13    6.11   0
  -2   6   8  684.48   10.58   0
   2  -6  -8  680.01    8.68   0
   1  -6  -8  752.61   10.99   0
  -1   6   8  729.95    8.75   0
   0  -6  -8  210.33    7.34   0
   0   6   8  210.43    7.26   0
  -1  -6  -8  120.98    9.29   0
   1   6   8  133.72    9.16   0
  -2  -6  -8    0.40    9.30   0
   2   6   8    4.14    6.69   0
  -3  -6  -8   43.91   10.65   0
   3   6   8   39.18    7.60   0
   4   6   8   31.21   11.35   0
  -4  -6  -8   22.12   11.45   0
  15  -7  -8   39.01   12.26   0
  15  -7  -8   32.70    8.85   0
  14  -7  -8   -1.16    8.01   0
  14  -7  -8    4.61   11.29   0
  13  -7  -8   13.74    7.59   0
  13  -7  -8   16.53    7.51   0
  12  -7  -8  135.95    7.88   0
  12  -7  -8  133.52    7.94   0
  11  -7  -8   15.97    7.27   0
  10  -7  -8   74.46    6.82   0
   9  -7  -8  113.11    6.80   0
  -8   7   8  163.46   10.45   0
   8  -7  -8  157.69    7.09   0
  -7   7   8  509.56   12.34   0
   7  -7  -8  404.83    8.09   0
   6  -7  -8   47.54    6.17   0
  -6   7   8   41.72    9.63   0
  -6   7   8   46.42    8.96   0
   5  -7  -8   43.44    8.68   0
  -5   7   8   -0.10    7.03   0
  -5   7   8   33.92    8.59   0
  -4   7   8    2.56    9.55   0
   4  -7  -8   -1.78    6.27   0
  -4   7   8    3.33    5.93   0
  -3   7   8   21.84    6.17   0
   3  -7  -8   27.01    6.10   0
  -2   7   8    5.45    6.05   0
   2  -7  -8    8.49    6.08   0
  -1   7   8  234.55    7.26   0
   1  -7  -8  251.78    7.51   0
   0  -7  -8  139.88    7.30   0
   0   7   8  131.66    7.02   0
  -1  -7  -8  258.09    7.81   0
   1   7   8  299.41   10.37   0
  -2  -7  -8   89.30   10.89   0
   2   7   8   93.82   10.78   0
  -3  -7  -8   23.98   11.55   0
   3   7   8   41.70   11.33   0
  15  -8  -8   43.76   12.79   0
  15  -8  -8   33.83   12.59   0
  14  -8  -8    8.16    8.19   0
  14  -8  -8   10.88   11.60   0
  13  -8  -8   53.78    7.90   0
  13  -8  -8   49.20    8.02   0
  12  -8  -8    9.12    7.75   0
  12  -8  -8   11.84    7.67   0
  11  -8  -8   57.08    7.38   0
  10  -8  -8  149.86   10.19   0
  -9   8   8  339.33   12.42   0
   9  -8  -8  320.36   10.69   0
  -8   8   8   44.42    7.07   0
   8  -8  -8   34.13    9.28   0
  -7   8   8  376.34   12.08   0
   7  -8  -8  334.32   10.25   0
   6  -8  -8  510.68    8.51   0
  -6   8   8  560.23   12.93   0
  -6   8   8  551.27    8.67   0
   5  -8  -8  417.29   10.08   0
  -5   8   8  433.57   10.36   0
  -5   8   8  460.39   12.22   0
  -4   8   8  288.70    7.55   0
  -4   8   8  316.36   11.56   0
   4  -8  -8  315.96    7.73   0
   3  -8  -8   32.48    6.44   0
  -3   8   8   35.31    9.29   0
  -2   8   8   16.44    6.55   0
   2  -8  -8   16.05    8.89   0
  -1   8   8   68.24    6.92   0
   1  -8  -8   55.91    6.82   0
   0   8   8   27.91    7.14   0
   0  -8  -8   31.68    7.34   0
  -1  -8  -8   48.22   10.71   0
   1   8   8   33.80    7.79   0
  -2  -8  -8  228.25   12.30   0
   2   8   8  236.00   12.28   0
  14  -9  -8   25.83   11.82   0
  14  -9  -8   26.03    8.33   0
  13  -9  -8   35.29    8.31   0
  13  -9  -8   28.73   11.32   0
  12  -9  -8  138.43    8.39   0
  12  -9  -8  166.87   11.60   0
  11  -9  -8   17.35    7.30   0
  10  -9  -8   -3.09    9.76   0
  -9   9   8  207.45   13.87   0
   9  -9  -8  174.15    7.67   0
  -8   9   8  182.23   11.23   0
   8  -9  -8  175.81    7.75   0
  -7   9   8  258.83   12.04   0
   7  -9  -8  227.24    7.96   0
  -6   9   8  301.14   11.96   0
  -6   9   8  316.56   10.36   0
   6  -9  -8  262.86    7.95   0
  -5   9   8   99.93    7.25   0
  -5   9   8  107.97   10.56   0
   5  -9  -8  103.34    9.71   0
  -4   9   8  231.50   10.21   0
  -4   9   8  207.08   11.58   0
   4  -9  -8  212.10    7.70   0
   3  -9  -8   58.15    6.94   0
  -3   9   8   60.51    6.80   0
   2  -9  -8   59.05    7.20   0
  -2   9   8   71.12    9.86   0
  -1   9   8   27.32    7.40   0
   1  -9  -8   31.35   10.27   0
   0   9   8   60.77    7.86   0
   0  -9  -8   78.66   11.35   0
   1   9   8   18.87    8.19   0
  -1  -9  -8   19.24    8.14   0
  13 -10  -8   75.43    8.96   0
  13 -10  -8   88.36    8.93   0
  12 -10  -8  180.85    8.90   0
  11 -10  -8   50.13    7.77   0
  10 -10  -8   33.24    7.82   0
  -9  10   8   50.51   13.37   0
   9 -10  -8   42.76    7.53   0
  -8  10   8    1.57   10.58   0
   8 -10  -8    9.87   10.15   0
   7 -10  -8   18.21   10.21   0
  -7  10   8    6.54   10.97   0
   6 -10  -8  276.25   10.86   0
  -6  10   8  275.97   12.31   0
  -6  10   8  273.35    8.12   0
  -5  10   8  176.48    7.47   0
  -5  10   8  205.59   12.03   0
   5 -10  -8  189.67   10.60   0
  -4  10   8  126.98   11.65   0
  -4  10   8  124.67   10.16   0
   4 -10  -8  117.36    7.83   0
  -3  10   8  114.38    7.81   0
   3 -10  -8  113.71    7.82   0
   2 -10  -8   94.85    7.99   0
  -2  10   8   97.01    7.98   0
   1 -10  -8  317.76    9.49   0
  -1  10   8  327.84   12.40   0
  12 -11  -8  285.82   12.90   0
  11 -11  -8  255.61   12.52   0
  10 -11  -8   59.25    8.11   0
  -9  11   8   83.68   16.69   0
   9 -11  -8   82.31   11.10   0
  -8  11   8   24.88   11.54   0
   8 -11  -8   22.10    7.87   0
  -7  11   8  137.08   12.07   0
   7 -11  -8  110.56    8.16   0
  -6  11   8   14.56   11.71   0
   6 -11  -8   14.24    7.73   0
  -5  11   8   39.08   11.94   0
   5 -11  -8   48.69    7.73   0
  -5  11   8   49.16    7.69   0
  -4  11   8  109.35    8.35   0
  -4  11   8   92.14    9.21   0
   4 -11  -8  121.59    8.12   0
  -3  11   8  214.85    9.06   0
   3 -11  -8  205.53    9.13   0
  -2  11   8   37.69    8.69   0
   2 -11  -8   38.21    8.28   0
  11 -12  -8  133.96   12.51   0
  10 -12  -8   90.61    9.01   0
  -9  12   8  212.97   20.77   0
   9 -12  -8  179.40    9.29   0
   8 -12  -8   62.18    8.35   0
  -8  12   8   65.25   15.58   0
   7 -12  -8   38.63   11.50   0
  -7  12   8   35.30   12.32   0
  -6  12   8   46.59   12.85   0
   6 -12  -8   36.03    8.39   0
  -5  12   8    8.61   12.89   0
   5 -12  -8   11.32    8.36   0
  -5  12   8    1.57   11.49   0
   1  15  -9   21.56   12.71   0
  -1 -15   9    5.44   13.22   0
  -1 -15   9    5.60   14.72   0
   0 -15   9    2.18   11.95   0
   0  15  -9   -6.67   12.24   0
   0 -15   9    0.55   12.63   0
  -1  15  -9    8.76    8.70   0
   1 -15   9    8.01    8.57   0
   1 -15   9    7.29   12.43   0
  -2  15  -9   67.49    9.49   0
   2 -15   9   51.97    9.00   0
   2 -15   9   55.95   12.65   0
   3 -15   9   51.37    9.01   0
  -3  15  -9   73.90   12.89   0
   3 -15   9   54.03   12.95   0
   4 -15   9   52.72   12.92   0
   4 -15   9   62.70   13.01   0
   5 -15   9   54.77    9.55   0
   5 -15   9   72.29   13.05   0
   3  14  -9  137.61   12.84   0
  -3 -14   9  100.94   15.68   0
  -3 -14   9   87.73   17.08   0
   2  14  -9   69.56    9.06   0
  -2 -14   9   74.51   14.36   0
  -2 -14   9   68.83   15.71   0
   1  14  -9  133.04   11.96   0
  -1 -14   9   92.90   12.97   0
  -1 -14   9   96.60   12.00   0
   0 -14   9   -1.98   10.86   0
   0  14  -9  -15.34   11.49   0
   0 -14   9    7.33   11.44   0
  -1  14  -9   18.66   11.27   0
   1 -14   9    8.79   11.23   0
   1 -14   9   16.42   11.54   0
   2 -14   9    8.58   11.40   0
  -2  14  -9    6.52   11.23   0
   2 -14   9   12.35    8.31   0
  -3  14  -9   39.18   11.66   0
   3 -14   9   23.20   11.58   0
   4 -14   9   12.98    8.49   0
   4 -14   9   13.08    8.30   0
   5 -14   9  146.57   12.95   0
   5 -14   9  176.40   12.77   0
   6 -14   9   86.84    9.40   0
   6 -14   9   90.39    9.16   0
   5  13  -9   16.11    8.98   0
   4  13  -9   30.42   11.80   0
   3  13  -9   69.80   11.74   0
  -3 -13   9   57.99   16.27   0
  -3 -13   9   52.19   16.98   0
   2  13  -9   21.99    8.12   0
  -2 -13   9   10.46   10.69   0
  -2 -13   9   15.57   11.12   0
  -1 -13   9  149.34   11.44   0
   1  13  -9  171.83    8.32   0
  -1 -13   9  139.85   14.66   0
   0  13  -9   85.43    8.18   0
   0 -13   9   73.48   10.88   0
   0 -13   9   68.28   11.43   0
   1 -13   9   47.68   10.73   0
  -1  13  -9   51.61    8.12   0
   1 -13   9   47.77   11.04   0
  -2  13  -9    9.91   10.71   0
   2 -13   9    4.52   10.74   0
   2 -13   9   10.22   10.85   0
  -3  13  -9   98.50   11.43   0
   3 -13   9   68.73   11.26   0
   4 -13   9    8.14   11.35   0
   4 -13   9   -6.44   11.03   0
   5 -13   9   21.31    8.12   0
   6 -13   9   33.81   11.67   0
   7 -13   9   23.70    8.61   0
   6  12  -9   87.14   12.39   0
   5  12  -9   12.52   11.49   0
   4  12  -9    8.26   11.06   0
   3  12  -9  127.34   11.21   0
  -3 -12   9   98.58   16.11   0
  -3 -12   9   96.59   16.74   0
   2  12  -9   97.80    8.09   0
  -2 -12   9   86.66   12.88   0
  -2 -12   9   82.46   11.46   0
   1  12  -9   67.63   10.52   0
  -1 -12   9   59.35   12.38   0
  -1 -12   9   55.33   10.78   0
   0  12  -9  194.36    8.34   0
   0 -12   9  154.34    8.37   0
   0 -12   9  163.22   11.55   0
  -1  12  -9  196.81    8.56   0
   1 -12   9  141.29    8.60   0
   1 -12   9  164.38   11.53   0
  -2  12  -9  289.22   11.92   0
   2 -12   9  234.42   11.87   0
   2 -12   9  258.43   11.89   0
   3 -12   9   32.35    7.80   0
  -3  12  -9   28.78   10.80   0
   4 -12   9   13.35    7.53   0
   5 -12   9    4.21   10.55   0
   6 -12   9   46.18    7.81   0
   6 -12   9   50.30    8.52   0
   7 -12   9    1.17   11.38   0
   7 -12   9    6.73    8.55   0
   8 -12   9   93.09    9.32   0
   8 -12   9  104.62   13.45   0
   8  11  -9   91.00    9.43   0
   7  11  -9   16.49    8.33   0
   6  11  -9   74.70    8.45   0
   5  11  -9   32.75    7.86   0
   4  11  -9   49.76   10.85   0
   3  11  -9    6.01    7.25   0
   2  11  -9  207.92    8.38   0
  -2 -11   9  188.10   13.75   0
  -2 -11   9  170.51   14.20   0
   1  11  -9  113.93    7.54   0
  -1 -11   9   99.65   12.46   0
  -1 -11   9  103.34   10.72   0
   0 -11   9  254.74   11.41   0
   0  11  -9  302.74    8.61   0
   0 -11   9  246.62   11.42   0
  -1  11  -9  153.43   10.65   0
   1 -11   9  130.68   10.56   0
   1 -11   9  131.25   10.54   0
  -2  11  -9  200.41    8.42   0
   2 -11   9  173.70   10.81   0
   2 -11   9  170.87   11.04   0
   3 -11   9  180.91    8.59   0
   4 -11   9  196.33    8.86   0
   4 -11   9  176.87    8.61   0
   5 -11   9  136.08   11.29   0
   5 -11   9  132.73   11.31   0
   6 -11   9   -1.47    7.53   0
   6 -11   9   11.55    7.88   0
   7 -11   9   13.18   11.21   0
   7 -11   9   12.83    8.27   0
   8 -11   9   33.84    8.62   0
   8 -11   9   25.69    9.06   0
   9  10  -9    7.09   12.95   0
   8  10  -9  153.81    9.40   0
   7  10  -9   69.02    8.22   0
   6  10  -9  179.53    8.31   0
   5  10  -9  156.98    8.19   0
   4  10  -9   59.20    7.35   0
   3  10  -9  210.34   10.97   0
  -2 -10   9   50.07   11.93   0
  -2 -10   9   55.40   13.50   0
   2  10  -9   49.62    7.00   0
   1  10  -9   60.51    9.62   0
  -1 -10   9   54.04    9.50   0
  -1 -10   9   61.74    9.48   0
   0 -10   9   -5.46    9.61   0
   0  10  -9   -4.90    9.51   0
   0 -10   9   -0.66    9.11   0
   1 -10   9  182.36    8.57   0
  -1  10  -9  229.02    8.16   0
   1 -10   9  196.19   10.53   0
   2 -10   9  105.33    7.75   0
  -2  10  -9  106.38    7.42   0
   3 -10   9  362.68   11.48   0
   3 -10   9  326.40    9.50   0
   4 -10   9  120.66   10.31   0
   4 -10   9  120.78    8.00   0
   5 -10   9  192.02   11.16   0
   5 -10   9  218.12   11.74   0
   6 -10   9  262.19    9.41   0
   6 -10   9  230.53    8.72   0
   7 -10   9   98.07   11.28   0
   7 -10   9  101.01    8.78   0
   8 -10   9   24.22    8.36   0
   8 -10   9   26.13   11.98   0
   9 -10   9   15.26   12.31   0
   9 -10   9   16.65    9.51   0
  10   9  -9    7.37    9.09   0
   9   9  -9   25.97    8.63   0
   8   9  -9    4.51    7.48   0
   7   9  -9    5.80    7.40   0
   6   9  -9   62.31   10.29   0
   5   9  -9  588.34   12.20   0
   4   9  -9  425.63    8.80   0
   3   9  -9  461.56   10.90   0
  -2  -9   9   54.78   13.20   0
   2   9  -9   68.05    7.12   0
  -2  -9   9   55.72   11.57   0
  -1  -9   9   63.73    9.31   0
   1   9  -9   67.49    6.80   0
  -1  -9   9   67.30   11.28   0
   0  -9   9  527.82   12.35   0
   0  -9   9  520.59   12.83   0
   0   9  -9  561.28    9.18   0
   1  -9   9   12.52    6.68   0
   1  -9   9    3.91    6.32   0
  -1   9  -9    5.22    6.90   0
   2  -9   9   50.20    9.95   0
  -2   9  -9   48.39    7.19   0
   3  -9   9  379.79    8.77   0
   3  -9   9  428.83   11.85   0
   4  -9   9  241.50    8.27   0
   4  -9   9  279.82   11.54   0
   5  -9   9   37.80    7.06   0
   5  -9   9   33.47    7.23   0
   6  -9   9  208.54    8.20   0
   6  -9   9  202.80   11.68   0
   7  -9   9  161.27   11.14   0
   7  -9   9  146.83   11.79   0
   8  -9   9  165.79    9.14   0
   8  -9   9  178.60    9.63   0
  -8   9  -9  174.25    8.94   0
   9  -9   9   33.86    8.64   0
   9  -9   9   39.01    9.32   0
  -9   9  -9   37.60    8.86   0
  10   8  -9   76.09    9.02   0
   9   8  -9   20.57   11.27   0
   8   8  -9  -12.62   10.26   0
   7   8  -9    6.76    9.73   0
   6   8  -9   11.05    6.63   0
   5   8  -9   82.54   10.04   0
   4   8  -9  334.43    8.29   0
   3   8  -9  643.76    9.70   0
   2   8  -9  368.51   10.36   0
  -2  -8   9  308.74   16.20   0
  -2  -8   9  293.42   16.18   0
  -1  -8   9   88.90   10.97   0
   1   8  -9  106.31    9.51   0
  -1  -8   9   83.35    9.45   0
   0  -8   9  456.82    8.81   0
   0  -8   9  444.65   11.51   0
   0   8  -9  438.33    8.62   0
   1  -8   9  105.33    9.82   0
   1  -8   9  111.68    9.28   0
  -1   8  -9   95.73    7.10   0
   2  -8   9  189.56    8.03   0
   3  -8   9   21.39    6.49   0
   3  -8   9   32.57    6.96   0
   4  -8   9  117.83    7.70   0
   4  -8   9  113.16    9.76   0
  -4   8  -9  130.24   10.16   0
   5  -8   9   24.31   10.37   0
   5  -8   9    6.70    9.54   0
  -5   8  -9    6.77    9.87   0
   6  -8   9  289.60   10.90   0
   6  -8   9  286.40   11.96   0
  -6   8  -9  275.46    8.54   0
   7  -8   9  150.88    8.22   0
   7  -8   9  169.39   12.05   0
  -7   8  -9  166.41    8.26   0
   8  -8   9   81.06    8.34   0
   8  -8   9   85.00    8.88   0
  -8   8  -9   71.12    8.07   0
   9  -8   9   72.18   12.46   0
   9  -8   9   89.98   13.06   0
  -9   8  -9  116.03   12.52   0
  11   7  -9   29.55   12.24   0
  10   7  -9   98.96    8.49   0
   9   7  -9   82.61    7.96   0
   8   7  -9  265.20    8.36   0
   7   7  -9   33.88    6.85   0
   6   7  -9   60.71    6.96   0
   5   7  -9   55.99    9.28   0
   4   7  -9   11.51    8.94   0
   3   7  -9   10.68    6.26   0
   2   7  -9  122.19    9.18   0
  -2  -7   9  101.49   13.17   0
  -2  -7   9   99.36   13.75   0
  -1  -7   9  335.94    8.23   0
   1   7  -9  334.58    8.25   0
  -1  -7   9  299.79   10.85   0
   0  -7   9  880.06   10.78   0
   0  -7   9  707.29   10.94   0
   0   7  -9  923.97   12.55   0
   1  -7   9  400.66    8.84   0
  -1   7  -9  433.27   11.04   0
  -1   7  -9  378.44   11.40   0
   2  -7   9   30.19    9.92   0
   2  -7   9   31.52    6.15   0
  -2   7  -9   36.38    6.62   0
   3  -7   9   82.87    6.52   0
   3  -7   9   93.47    9.93   0
  -3   7  -9   84.86    7.01   0
   4  -7   9    0.41    9.93   0
  -4   7  -9   -0.16    6.49   0
   4  -7   9   10.14    8.90   0
   5  -7   9   45.29    6.65   0
   5  -7   9   61.40   10.60   0
  -5   7  -9   74.99    9.45   0
   6  -7   9   -2.90    6.84   0
   6  -7   9   -3.81   10.55   0
  -6   7  -9   -3.13    9.87   0
   7  -7   9  214.45    8.38   0
   7  -7   9  220.87    9.37   0
  -7   7  -9  239.36    8.56   0
   8  -7   9   65.83    8.05   0
   8  -7   9   59.42    8.88   0
  -8   7  -9   69.79    8.25   0
   9  -7   9  126.14    9.69   0
   9  -7   9  138.48   12.39   0
  -9   7  -9  123.71    9.02   0
  12   6  -9   95.54   12.83   0
  12   6  -9   65.12   18.39   0
  11   6  -9   13.90    8.46   0
  10   6  -9  123.75   11.40   0
   9   6  -9   49.27   10.49   0
   8   6  -9  209.00   10.46   0
   7   6  -9  401.36   10.65   0
   6   6  -9  146.18    9.60   0
   5   6  -9  236.06    7.53   0
   4   6  -9   20.76    6.34   0
   3   6  -9   38.42    6.27   0
  -2  -6   9    9.41    6.16   0
   2   6  -9    7.09    6.39   0
  -2  -6   9    8.44   10.10   0
  -1  -6   9  186.05   10.06   0
   1   6  -9  193.89    9.91   0
  -1  -6   9  152.21    9.56   0
   0  -6   9  182.73   10.30   0
   0  -6   9  171.63    9.38   0
   0   6  -9  168.92   10.25   0
   0   6  -9  158.39    9.86   0
   1  -6   9  843.37   12.80   0
  -1   6  -9  823.17   12.93   0
   2  -6   9  414.05    8.85   0
   2  -6   9  441.31   10.33   0
  -2   6  -9  416.72    8.60   0
   3  -6   9  294.00    8.73   0
   3  -6   9  299.25    7.75   0
  -3   6  -9  298.74    7.93   0
   4  -6   9   85.29    9.16   0
   4  -6   9   82.62   10.13   0
  -4   6  -9   65.65    9.37   0
   5  -6   9   40.67    6.66   0
   5  -6   9   48.18   10.30   0
  -5   6  -9   56.17    6.78   0
   6  -6   9  130.86    9.83   0
   6  -6   9  112.60    8.29   0
  -6   6  -9  108.26    7.34   0
   7  -6   9    7.28   10.10   0
   7  -6   9   12.24   11.38   0
  -7   6  -9    7.61    7.19   0
   8  -6   9    2.23    8.30   0
   8  -6   9   10.47   10.73   0
  -8   6  -9    8.62   10.84   0
   9  -6   9   58.80    9.58   0
   9  -6   9   81.12   12.10   0
  -9   6  -9   73.80   12.09   0
  12   5  -9   -2.61    8.50   0
  12   5  -9    3.32   13.65   0
  11   5  -9    7.92   15.76   0
  11   5  -9   20.38   11.31   0
  11   5  -9    8.24   15.10   0
  10   5  -9   63.21    7.82   0
   9   5  -9  144.89   10.38   0
   8   5  -9   71.71    7.45   0
   7   5  -9  179.50    7.22   0
   6   5  -9   42.23    6.54   0
   5   5  -9 1027.15   10.34   0
   4   5  -9  324.12   10.03   0
  -3  -5   9   -0.48    6.13   0
   3   5  -9    4.27    8.95   0
   2   5  -9   -2.25    6.70   0
  -2  -5   9   -2.30    9.03   0
   2   5  -9   19.96   11.36   0
  -2  -5   9    1.84    8.11   0
  -1  -5   9  711.86    9.67   0
   1   5  -9  726.37   11.85   0
  -1  -5   9  684.80   12.39   0
   1   5  -9  684.67   13.16   0
   0  -5   9   31.42    7.43   0
   0   5  -9   75.26    8.97   0
   1  -5   9  246.18   10.48   0
   1  -5   9  207.33    7.29   0
  -1   5  -9  212.41    7.45   0
   2  -5   9  312.87    8.54   0
   2  -5   9  284.83    7.49   0
  -2   5  -9  295.01    9.94   0
   3  -5   9  236.98   10.68   0
   3  -5   9  243.81    9.48   0
  -3   5  -9  237.39    7.47   0
   4  -5   9  373.39    9.18   0
   4  -5   9  447.10   10.47   0
  -4   5  -9  469.49   10.61   0
   5  -5   9  169.12    8.14   0
   5  -5   9  163.57    9.59   0
  -5   5  -9  156.94    7.21   0
   6  -5   9  142.28    7.36   0
   6  -5   9  132.95    8.32   0
  -6   5  -9  147.31    7.58   0
   7  -5   9   -3.13    8.11   0
   7  -5   9    7.74    7.25   0
  -7   5  -9    2.31    7.29   0
   8  -5   9    6.59    8.73   0
   8  -5   9   12.19    7.76   0
  -8   5  -9    9.75    7.67   0
   9  -5   9    1.82    9.14   0
   9  -5   9    7.01    8.50   0
  -9   5  -9   11.71    8.57   0
  13   4  -9   41.55   12.63   0
  13   4  -9   36.66   12.26   0
  12   4  -9   20.08    8.13   0
  12   4  -9   22.63   13.39   0
  11   4  -9   83.76   13.26   0
  11   4  -9   98.10   11.15   0
  11   4  -9   63.67   11.67   0
  10   4  -9   99.92   10.67   0
  10   4  -9   83.44   14.78   0
  10   4  -9   80.89   15.33   0
   9   4  -9   88.91   10.39   0
   8   4  -9  146.78    9.90   0
   7   4  -9  718.08   11.33   0
   6   4  -9  301.39    7.62   0
   5   4  -9  741.76   11.57   0
  -4  -4   9  631.59    9.12   0
   4   4  -9  635.95    9.34   0
  -3  -4   9  141.50    6.91   0
   3   4  -9  157.65    9.54   0
   3   4  -9  131.60   12.31   0
  -3  -4   9  127.11   11.27   0
  -2  -4   9 1061.92   12.48   0
   2   4  -9  995.57   10.54   0
  -2  -4   9  910.49   14.24   0
   2   4  -9  945.08   15.16   0
  -1  -4   9  178.18    7.72   0
   1   4  -9  181.85    7.72   0
  -1  -4   9  201.91    9.23   0
   1   4  -9  195.69    9.61   0
   0  -4   9    9.93    6.70   0
   0   4  -9   13.40    8.34   0
   1  -4   9   13.02    9.48   0
   1  -4   9   12.71    8.41   0
  -1   4  -9   11.33    6.04   0
   2  -4   9  419.78   11.41   0
   2  -4   9  378.55    7.81   0
  -2   4  -9  419.88   10.09   0
   3  -4   9   43.57    7.24   0
   3  -4   9   83.55    8.63   0
  -3   4  -9   25.77    6.22   0
   4  -4   9  287.97    8.59   0
   4  -4   9  300.95    9.69   0
  -4   4  -9  301.28    7.53   0
   5  -4   9  455.65    9.74   0
   5  -4   9  488.29   10.83   0
  -5   4  -9  461.93    8.47   0
   6  -4   9  451.72    9.85   0
   6  -4   9  441.62    8.78   0
  -6   4  -9  442.48    8.84   0
   7  -4   9  255.83   12.87   0
   7  -4   9  263.83   11.08   0
  -7   4  -9  255.44   11.04   0
   8  -4   9    2.20    8.85   0
   8  -4   9   19.60   10.83   0
  -8   4  -9   -3.42    7.60   0
  13   3  -9  131.10   12.37   0
  13   3  -9  101.37   12.24   0
  12   3  -9   94.11   11.98   0
  12   3  -9  130.74    8.52   0
  12   3  -9  105.39   11.80   0
  11   3  -9   61.63   10.87   0
  11   3  -9   54.10   12.67   0
  11   3  -9   56.29   12.52   0
  10   3  -9  246.69    8.42   0
  10   3  -9  217.08   12.14   0
  10   3  -9  210.89   12.82   0
   9   3  -9  127.42   14.39   0
   9   3  -9  125.46    7.45   0
   9   3  -9  117.64   14.81   0
   8   3  -9   30.89    6.49   0
   7   3  -9   74.05    6.91   0
   6   3  -9   98.95    6.72   0
  -5  -3   9  334.52    7.70   0
   5   3  -9  341.06   10.28   0
  -4  -3   9  851.95   10.19   0
   4   3  -9  846.53   12.25   0
  -4  -3   9  784.30   18.33   0
   4   3  -9  749.21   17.90   0
  -3  -3   9  452.59    8.40   0
   3   3  -9  469.13    8.62   0
  -3  -3   9  409.62   11.50   0
   3   3  -9  441.75   11.98   0
  -2  -3   9  633.10   10.39   0
  -2  -3   9  824.32   11.86   0
   2   3  -9  779.77   11.93   0
   2   3  -9  756.80   12.71   0
  -1  -3   9 1079.49   10.92   0
   1   3  -9 1054.72   13.35   0
   0  -3   9  556.34    9.26   0
   0  -3   9  575.28   10.55   0
   0   3  -9  565.36   10.66   0
   1  -3   9  726.10   10.14   0
   1  -3   9  656.47    9.02   0
  -1   3  -9  715.41   11.13   0
   2  -3   9   16.72    7.15   0
   2  -3   9   20.65    8.38   0
  -2   3  -9   19.11    5.71   0
   3  -3   9   62.87    7.37   0
   3  -3   9   63.22    8.66   0
  -3   3  -9   65.74    6.33   0
   4  -3   9   35.57    7.90   0
   4  -3   9   33.98    6.14   0
  -4   3  -9   73.63    8.79   0
   5  -3   9  165.01    8.47   0
   5  -3   9  219.59    7.22   0
  -5   3  -9  211.93    7.40   0
   6  -3   9   72.38    8.38   0
   6  -3   9  111.22    9.81   0
  -6   3  -9   89.67    9.84   0
   7  -3   9  351.75   10.04   0
   7  -3   9  343.02    8.95   0
  -7   3  -9  353.35    8.77   0
   8  -3   9   96.91    9.47   0
   8  -3   9   85.13    8.23   0
  -8   3  -9  124.68    8.48   0
  14   2  -9    9.55   12.34   0
  14   2  -9   13.76   12.17   0
  13   2  -9   10.99   11.64   0
  13   2  -9    5.34    7.56   0
  12   2  -9  169.16   11.95   0
  12   2  -9  205.15    8.65   0
  12   2  -9  177.90   11.51   0
  11   2  -9  310.57    8.96   0
  11   2  -9  274.31   12.02   0
  11   2  -9  271.51   12.70   0
  10   2  -9  501.43   13.44   0
  10   2  -9  604.04   11.91   0
  10   2  -9  477.90   13.58   0
   9   2  -9  311.33   10.85   0
   9   2  -9  273.68   12.18   0
   9   2  -9  289.46   13.66   0
   8   2  -9    1.29   10.56   0
   8   2  -9   11.41    6.51   0
   8   2  -9    0.43   10.41   0
   7   2  -9  211.86   10.01   0
   7   2  -9  187.18   13.51   0
   7   2  -9  179.21   12.66   0
   6   2  -9  102.35    6.92   0
   6   2  -9   90.06   12.76   0
   6   2  -9   94.21   11.33   0
  -5  -2   9   82.22    8.82   0
   5   2  -9   67.23    6.68   0
   5   2  -9   60.34   10.71   0
  -4  -2   9  253.75    9.47   0
   4   2  -9  220.76   10.09   0
   4   2  -9  236.92    7.64   0
  -4  -2   9  224.57   10.06   0
  -3  -2   9  787.15   12.01   0
   3   2  -9  770.64   12.87   0
   3   2  -9  768.53   10.02   0
  -3  -2   9  765.00   12.70   0
   2   2  -9  340.87    8.13   0
  -2  -2   9  397.46   10.60   0
  -1  -2   9  573.90   10.62   0
   1   2  -9  579.20   10.86   0
  -1  -2   9  604.04   11.20   0
   0   2  -9  254.24    9.04   0
   0  -2   9  245.45    8.10   0
   0  -2   9  253.64    9.10   0
  -1   2  -9 1111.14   12.19   0
   1  -2   9  900.87   10.82   0
   1  -2   9 1029.20   10.15   0
   2  -2   9  492.80    9.36   0
   2  -2   9  505.67   10.04   0
  -2   2  -9  474.90    7.94   0
   3  -2   9   31.73    7.51   0
   3  -2   9   79.57    8.57   0
  -3   2  -9   42.72    6.05   0
   4  -2   9   22.23   10.21   0
   4  -2   9    3.40    6.06   0
  -4   2  -9    5.39    6.17   0
   5  -2   9   88.09   10.99   0
   5  -2   9   82.50    7.08   0
  -5   2  -9   88.18    9.79   0
   6  -2   9   18.43    8.25   0
   6  -2   9    5.72    6.90   0
  -6   2  -9   16.44    9.83   0
   7  -2   9   41.05   10.70   0
  -7   2  -9   40.18    7.52   0
   8  -2   9   77.04    8.54   0
  -8   2  -9   89.67    8.81   0
  14   1  -9   13.03    8.55   0
  14   1  -9    9.04    8.54   0
  13   1  -9    2.40   11.16   0
  13   1  -9    0.82   11.02   0
  13   1  -9   -2.74   10.52   0
  12   1  -9   -2.05    7.47   0
  12   1  -9   -2.48    9.68   0
  12   1  -9    3.08   10.50   0
  11   1  -9   28.44    9.60   0
  11   1  -9   25.82   10.35   0
  11   1  -9   18.57    9.74   0
  10   1  -9  214.24    7.98   0
[truncated: 163,481 more chars]
